# Supplementary material
Source: HighWire-hosted journal article supplement (doi:10.1101/rna.1905910)
Supplement: Supplemental_Table.xlsx [file Supplemental_Table.xlsx]

## Sheet: CoMAP data
Probe Set ID	Gene Title	Gene Symbol	IP-pre124-1_021209.2.rma-gene-default-Signal	IP-pre124-2_021209.2.rma-gene-default-Signal	IP-pre124-3_021209.2.rma-gene-default-Signal	IP-pre128-1_021209.2.rma-gene-default-Signal	IP-pre128-2_021209.2.rma-gene-default-Signal	IP-pre128-3_021209.2.rma-gene-default-Signal	IP-preneg-1_021209.2.rma-gene-default-Signal	IP-preneg-2_021209.2.rma-gene-default-Signal	IP-preneg-3_021209.2.rma-gene-default-Signal
7917103	zinc finger, ZZ-type containing 3	ZZZ3	0.841906	0.841906	0.735015	0.926347	0.763105	0.996966	0.883571	0.841906	0.943293
8011542	zinc finger, ZZ-type with EF-hand domain 1	ZZEF1	0.953048	0.87926	1.04005	0.891766	1.02407	0.994654	0.951887	0.994654	0.994654
8136918	zyxin	ZYX	4.20575	4.19913	3.98794	3.46208	3.7039	3.4964	4.4465	4.50137	4.47937
7901479	zyg-11 homolog B (C. elegans)	ZYG11B	1.04309	0.687844	0.702037	0.851564	0.870958	1.00533	0.851564	0.851564	0.943293
7901497	zyg-11 homolog A (C. elegans)	ZYG11A	0.935056	0.868643	0.775175	0.861251	0.868975	0.868643	0.78256	1.01106	0.767685
8090351	ZXD family zinc finger C	ZXDC	1.67059	1.87274	1.83222	2.00656	1.75381	1.79223	1.78922	1.77248	1.62485
8167942	zinc finger, X-linked, duplicated B	ZXDB	1.50765	1.39986	1.40357	1.406	1.56261	1.80146	1.55725	1.54404	1.5447
8173201	zinc finger, X-linked, duplicated A	ZXDA	5.24392	5.41563	5.41617	5.4721	5.44426	4.80265	5.59627	5.36902	5.38184
7933707	ZW10 interactor	ZWINT	1.06605	1.09991	0.962362	1.12686	1.4061	1.2722	1.50792	2.2395	1.79777
7984330	Zwilch, kinetochore associated, homolog (Drosophila)	ZWILCH	0.798401	0.79331	0.798401	0.901479	0.798401	0.798401	0.798401	0.7196	0.724692
7951734	ZW10, kinetochore associated, homolog (Drosophila)	ZW10	0.934024	0.851564	0.735119	0.851564	0.851564	0.856656	0.798423	0.851564	0.789147
8129108	zinc finger with UFM1-specific peptidase domain	ZUFSP	0.880384	0.691711	0.716349	0.662957	0.909557	0.869178	0.65012	0.73252	0.723854
8105506	zinc finger, SWIM-type containing 6	ZSWIM6	1.15744	1.15744	1.0474	1.01338	1.41278	1.15744	1.1055	1.15744	1.832
7915682	zinc finger, SWIM-type containing 5	ZSWIM5	0.866105	1.08647	1.07374	1.10833	1.06201	1.07374	1.28814	1.09522	1.00409
8026198	zinc finger, SWIM-type containing 4	ZSWIM4	2.10005	2.45883	1.49541	2.44496	1.75869	2.10926	1.86515	2.06921	2.42297
8063071	zinc finger, SWIM-type containing 3	ZSWIM3	0.839902	0.875873	0.807576	0.863624	1.02983	1.18195	1.00588	1.0125	0.955188
8057563	zinc finger, SWIM-type containing 2	ZSWIM2	0.814895	0.780902	1.01763	0.797799	0.901471	0.793188	0.970743	0.804276	0.716597
8063074	zinc finger, SWIM-type containing 1	ZSWIM1	1.43504	1.36085	1.40445	1.40869	1.40869	1.26548	1.76328	1.41711	1.27018
8039577	zinc finger and SCAN domain containing 5	ZSCAN5	1.07818	0.946942	1.04359	1.1009	1.23925	1.01897	0.929588	1.15871	0.829583
8031799	zinc finger and SCAN domain containing 4	ZSCAN4	0.634221	0.793593	0.968209	0.833381	0.74712	0.775308	0.867855	0.775308	0.754103
7988082	zinc finger and SCAN domain containing 29	ZSCAN29	1.0599	1.06082	1.09326	1.43007	1.24363	1.42663	1.2462	1.22052	1.22052
8124583	zinc finger and SCAN domain containing 23	ZSCAN23	0.844182	0.839914	0.727828	0.808992	0.788114	0.763796	0.788114	0.765651	0.788114
8031908	zinc finger and SCAN domain containing 22	ZSCAN22	1.64968	1.29943	1.35496	1.16939	1.25528	1.05719	1.13335	1.24824	1.04779
8134689	zinc finger and SCAN domain containing 21	ZSCAN21	1.05051	1.0001	1.21032	1.07798	1.06611	1.17776	1.20768	0.972913	1.04873
7899884	zinc finger and SCAN domain containing 20	ZSCAN20	0.975256	0.955013	1.01723	1.60079	1.03897	0.911508	1.03897	1.13359	1.03897
7985577	zinc finger and SCAN domain containing 2	ZSCAN2	0.973168	1.08258	1.06164	1.09177	1.12926	1.09177	1.09177	1.17889	1.04549
8039730	zinc finger and SCAN domain containing 18	ZSCAN18	1.40596	1.53073	1.53014	1.53014	1.37173	1.45726	1.54015	1.61429	1.53014
8117640	zinc finger and SCAN domain containing 16	ZSCAN16	0.78941	0.642678	1.0434	0.800782	0.846892	0.739064	0.808031	1.08154	0.78941
8124574	zinc finger and SCAN domain containing 12	ZSCAN12	0.850066	0.809045	0.856442	0.838747	0.821872	0.855804	0.851564	0.999352	0.889369
7998921	zinc finger and SCAN domain containing 10	ZSCAN10	1.06512	0.941101	1.09708	1.09708	0.886222	1.17976	1.21092	1.18524	1.32294
8031847	zinc finger and SCAN domain containing 1	ZSCAN1	3.40301	3.42864	3.44105	3.42864	3.44105	3.41178	3.4432	3.54518	3.3841
8166195	zinc finger (CCCH type), RNA-binding motif and serine/arginine rich 2	ZRSR2	0.867806	0.937231	1.09957	1.13267	0.93403	1.04455	0.931533	0.862295	1.09957
8107353	zinc finger (CCCH type), RNA-binding motif and serine/arginine rich 1	ZRSR1	0.991686	1.34436	1.01997	1.22558	2.19268	1.41365	1.66987	1.23104	1.04352
8141898	zuotin related factor 1	ZRF1	1.09627	0.804204	0.754991	0.86316	0.804204	0.793116	0.840804	0.787958	0.735377
8086008	zinc finger, RAN-binding domain containing 3 /// dynein, cytoplasmic 1, light intermediate chain 1	ZRANB3 /// DYNC1LI1	0.960464	0.695191	0.918395	1.08681	0.86835	1.2389	0.917285	0.903116	0.847005
8055377	zinc finger, RAN-binding domain containing 3	ZRANB3	0.838345	0.948961	0.779084	0.8937	0.933938	0.838345	0.814793	0.838345	0.838345
7916969	zinc finger, RAN-binding domain containing 2	ZRANB2	0.862394	0.86582	0.796229	0.947083	0.763105	0.862179	0.897438	0.807771	0.912521
7931226	zinc finger, RAN-binding domain containing 1	ZRANB1	0.943966	0.81564	1.04816	1.06231	0.819503	1.07845	0.88556	0.986625	1.35233
8081407	zona pellucida-like domain containing 1	ZPLD1	0.757594	0.836623	0.811012	0.795904	0.684116	0.835898	0.811012	0.855815	0.830535
8006958	zona pellucida binding protein 2	ZPBP2	0.774097	0.661031	0.845113	0.928916	0.873524	0.934541	0.836636	1.02725	0.75459
8139622	zona pellucida binding protein	ZPBP	0.905278	0.817012	0.804989	0.860549	0.960035	0.91575	0.932949	0.736593	0.85461
7925419	zona pellucida glycoprotein 4	ZP4	0.786123	0.9063	0.961669	1.11857	0.98178	1.01048	0.848276	0.972243	0.807909
8133728	zona pellucida glycoprotein 3 (sperm receptor)	ZP3	0.895685	0.788058	1.19855	0.987205	1.03688	0.848089	0.897558	1.21877	1.11752
8000097	zona pellucida glycoprotein 2 (sperm receptor)	ZP2	1.11269	0.989952	0.929098	0.984617	0.949923	0.984617	0.89745	0.939051	0.984617
7940358	zona pellucida glycoprotein 1 (sperm receptor)	ZP1	1.04369	1.00904	1.15035	0.939455	0.939536	1.04843	1.09588	1.35266	0.960691
8024934	zinc and ring finger 4	ZNRF4	1.37565	0.967808	0.924013	1.41145	1.23358	1.32038	1.1117	1.58771	1.22338
8072160	zinc and ring finger 3	ZNRF3	0.947988	0.858778	0.819444	0.980749	1.16523	1.0703	0.877306	1.03992	1.1349
8132062	zinc and ring finger 2	ZNRF2	2.15806	2.1426	2.11028	1.73263	2.26335	1.98902	1.93341	1.83139	2.20711
7997247	zinc and ring finger 1	ZNRF1	1.69657	1.44143	1.91209	1.68863	1.65463	1.54195	1.64525	1.58987	1.90465
8117822	zinc ribbon domain containing 1	ZNRD1	0.882251	0.934446	0.845777	0.993428	0.922769	0.922769	1.38939	0.929049	0.788948
8179055	zinc ribbon domain containing 1	ZNRD1	0.91346	0.911026	1.10952	1.03043	0.94072	0.759668	1.65625	0.708431	1.02206
8042859	zinc finger, HIT type 4 /// WW domain binding protein 1	ZNHIT4 /// WBP1	1.70969	1.84857	1.88065	2.21273	1.76977	1.50571	1.85918	1.79278	2.14461
8006627	zinc finger, HIT type 3	ZNHIT3	0.958762	1.01883	0.990744	1.05106	1.01883	0.933024	1.01883	1.17853	1.00864
7949373	zinc finger, HIT type 2	ZNHIT2	1.50895	1.71998	1.47361	1.29933	1.88808	1.5481	1.5481	1.44948	1.5481
8135089	zinc finger, HIT type 1	ZNHIT1	0.922803	1.31448	0.922803	0.827835	0.922803	0.696346	1.14393	0.922803	1.01453
8066905	zinc finger, NFX1-type containing 1	ZNFX1	1.51845	1.38319	1.38319	1.25155	1.37906	1.19334	1.43172	1.37102	1.51778
8035836	zinc finger protein 99	ZNF99	1.13139	1.01025	0.781146	0.808031	0.652143	1.03655	0.808031	0.763105	0.655093
8027247	zinc finger protein 93	ZNF93	0.774021	0.908062	1.14354	1.03475	1.02251	0.981466	1.11547	1.05557	1.16596
8133089	zinc finger protein 92	ZNF92	0.838345	0.739785	0.995017	0.974926	1.034	0.631462	0.838345	0.838345	0.843437
8035842	zinc finger protein 91	ZNF91	0.890847	1.00075	0.775435	0.922803	1.15132	0.783914	0.922803	0.983426	0.922803
8027254	zinc finger protein 90	ZNF90	0.95688	0.765453	1.05691	0.963258	0.951719	1.01031	0.952427	1.01429	1.04249
8027272	zinc finger protein 85	ZNF85	0.854075	0.85022	0.632098	0.897539	0.671963	0.905576	0.749875	0.749875	0.800011
7960143	zinc finger protein 84	ZNF84	0.851564	0.773469	0.79612	0.642516	0.7503	0.617326	0.757595	0.915866	0.70719
8063723	zinc finger protein 831	ZNF831	0.994654	0.890454	0.879389	1.42552	0.955503	0.804801	1.10264	0.962044	0.835534
8006477	zinc finger protein 830	ZNF830	0.916249	0.958003	0.880139	0.914956	0.863934	0.978876	0.80615	0.728699	0.913358
8038967	zinc finger protein 83	ZNF83	0.790942	0.808272	0.790942	0.790942	0.72739	0.918552	0.802515	0.790942	0.71244
8036365	zinc finger protein 829	ZNF829	0.798325	0.798325	0.588315	1.02708	0.81889	0.837971	0.798325	1.15004	0.69114
7970376	zinc finger protein 828	ZNF828	0.895543	0.706486	0.815921	0.616002	0.815921	0.796578	0.87613	1.03349	0.898911
8103025	zinc finger protein 827	ZNF827	1.11712	1.53241	1.17247	1.17247	1.17247	1.06142	1.17136	1.15048	1.25513
8035789	zinc finger protein 826 /// zinc finger protein 737	ZNF826 /// ZNF737	0.815193	0.899727	0.986073	0.702003	0.802111	0.950418	0.709653	1.03858	0.757053
8034315	zinc finger protein 823	ZNF823	0.851564	0.856537	0.893246	0.834502	0.952619	0.910172	0.917688	0.820353	0.823025
8002618	zinc finger protein 821	ZNF821	1.00569	0.952319	1.10817	1.10911	1.12114	1.33176	1.15044	0.939802	1.10432
8030969	zinc finger protein 818	ZNF818	0.899925	0.640199	0.788086	0.876963	0.876691	0.890715	1.00114	0.839138	0.733813
8039017	zinc finger protein 816A /// zinc finger protein 321	ZNF816A /// ZNF321	0.991305	0.852576	0.897186	0.819585	0.833492	0.919918	0.842655	0.793669	0.728321
8030980	zinc finger protein 813 /// zinc finger protein 525	ZNF813 /// ZNF525	0.851564	0.890988	1.35206	0.915116	1.51984	1.13465	0.449746	0.630945	1.40763
8030997	zinc finger protein 813	ZNF813	0.85542	0.632109	0.851564	0.90814	0.851564	1.04159	0.851564	0.792265	0.851564
8167201	zinc finger protein 81	ZNF81	0.889294	0.777561	0.889294	0.914413	0.833198	0.970655	0.92263	0.927241	0.85293
8030946	zinc finger protein 808	ZNF808	0.772144	0.902467	1.339	1.00715	0.944728	0.680549	0.968888	0.925439	0.944494
8031712	zinc finger protein 805	ZNF805	0.870759	0.802803	0.824022	0.950447	1.0661	0.973123	0.956028	0.916484	0.809101
8134018	zinc finger protein 804B	ZNF804B	1.13428	0.989499	1.01586	1.01321	0.942291	0.859081	0.989499	1.01813	0.782615
8046815	zinc finger protein 804A	ZNF804A	0.835831	0.732186	0.975427	0.888075	0.86792	0.890715	0.888075	0.873384	0.888075
8142730	zinc finger protein 800	ZNF800	0.704069	0.805518	0.850651	0.966995	1.02144	1.08589	1.08891	0.870592	1.11701
8089694	zinc finger protein 80	ZNF80	0.681025	0.889091	0.747677	0.833055	0.841906	0.846997	1.06303	1.04879	0.663112
8031893	zinc finger protein 8	ZNF8	1.19312	1.59242	1.06633	1.19389	1.24083	1.22822	1.24	1.55463	1.23217
8034390	zinc finger protein 799	ZNF799	0.839928	0.749736	0.714455	0.730475	1.10796	0.681187	0.888351	0.639214	0.586072
8028254	zinc finger protein 793	ZNF793	1.15502	1.07508	1.07763	1.21159	1.14101	0.982224	1.15212	1.06215	1.06844
8036045	zinc finger protein 792	ZNF792	1.57255	1.82614	1.53214	1.3018	1.82366	1.46102	1.53214	1.44948	1.51359
8026007	zinc finger protein 791	ZNF791	1.02487	0.87542	0.941505	1.00974	1.087	0.806902	0.808031	1.11232	0.941505
8036357	zinc finger protein 790	ZNF790	0.90816	0.831454	0.831454	0.762292	0.988829	0.890715	1.0141	1.01048	0.737225
8158022	zinc finger protein 79	ZNF79	0.937823	1.26848	0.894876	0.954236	0.941457	1.01083	0.923655	1.05999	0.845158
8134613	zinc finger protein 789	ZNF789	1.18815	1.25797	1.43063	1.22284	0.995414	1.05109	1.2517	1.22697	1.43063
8025992	zinc finger family member 788	ZNF788	0.908368	0.946296	0.797872	0.776751	0.916164	0.936903	0.767629	0.803689	0.797872
8039569	zinc finger protein 787	ZNF787	3.26927	2.96164	3.26363	3.14705	2.22384	3.04866	2.94659	3.02077	3.02077
8143697	zinc finger protein 786	ZNF786	0.98271	1.1064	0.99578	1.06459	0.991636	1.12813	0.994654	1.05788	0.945636
8000917	zinc finger protein 785 /// zinc finger protein 688	ZNF785 /// ZNF688	1.78954	1.74722	2.00972	1.77558	1.74745	2.50769	2.24182	1.95415	1.90664
8039530	zinc finger protein 784	ZNF784	1.84241	1.58014	2.14796	1.57358	1.66561	1.82719	1.94996	1.68637	2.27754
8162639	zinc finger protein 782	ZNF782	1.08333	0.832596	0.626839	0.901758	0.695855	0.94874	1.01048	0.832596	0.832596
8036430	zinc finger protein 781	ZNF781	0.863861	0.674646	0.680996	0.910137	0.728624	0.922205	0.766751	0.883665	0.684893
8036813	zinc finger protein 780B	ZNF780B	0.734615	0.89084	0.841608	0.84787	0.807518	0.844003	0.595881	0.795489	0.868457
8036820	zinc finger protein 780A	ZNF780A	0.798903	0.678808	0.716971	0.726825	0.848863	0.820123	0.73125	0.802459	0.747084
7997896	zinc finger protein 778	ZNF778	1.01997	1.3379	0.998803	0.886178	0.949171	1.10772	1.07277	1.19625	1.10551
8143714	zinc finger protein 777	ZNF777	1.18561	0.766304	1.0497	1.01897	1.0497	1.25215	0.85297	1.13556	1.55941
8137228	zinc finger protein 775	ZNF775	2.34321	2.08296	2.27002	2.55478	2.52694	1.95613	2.46379	2.33034	3.07099
7986004	zinc finger protein 774	ZNF774	1.42324	1.09291	1.53495	1.18722	1.71894	1.43907	1.44765	1.51028	1.38925
8031759	zinc finger protein 773	ZNF773	1.79233	1.36408	1.2292	1.37117	1.40787	1.58405	1.58405	1.44776	1.55008
8039645	zinc finger protein 772	ZNF772	0.618273	1.12109	0.869949	0.792174	0.760079	0.977546	0.962294	0.760125	0.841911
7994817	zinc finger protein 771	ZNF771	1.42483	1.36745	1.14739	1.11324	1.17446	1.34752	1.22749	1.23029	1.0972
7987361	zinc finger protein 770	ZNF770	0.793569	0.675023	0.908904	0.896068	0.75113	1.12653	0.724141	0.727221	0.75113
7982527	zinc finger protein 770	ZNF770	0.699276	0.778882	0.782062	0.935303	0.812713	0.952659	0.739808	0.874181	0.556963
8032544	zinc finger protein 77	ZNF77	1.10561	1.46333	1.2758	1.20311	1.02199	1.24667	1.37215	1.06419	0.986878
8000899	zinc finger protein 768	ZNF768	3.49631	3.00065	3.02405	3.37856	3.02405	2.89089	2.95489	3.00803	3.10086
8143733	zinc finger family member 767	ZNF767	1.25213	1.02218	0.934773	1.12247	1.16147	0.989882	1.01139	1.10722	1.13962
8030899	zinc finger protein 766	ZNF766	1.08071	0.981735	0.734578	1.062	1.01748	0.772016	1.00042	0.949601	0.911297
8030982	zinc finger protein 765 /// zinc finger protein 813	ZNF765 /// ZNF813	1.36619	1.28066	1.40948	1.36664	1.36619	1.67234	1.28583	1.57498	1.52278
8000906	zinc finger protein 764	ZNF764	2.37984	2.71601	2.53505	3.01657	2.58946	2.74704	2.4788	2.5959	2.35979
8025978	zinc finger protein 763	ZNF763	0.686259	0.943126	0.865023	0.830564	0.860874	0.841906	0.841906	0.687864	0.861741
8030993	zinc finger protein 761	ZNF761	0.772458	0.983137	0.851564	0.828446	0.890787	0.985038	0.851564	0.851564	0.884746
8118915	zinc finger protein 76 (expressed in testis)	ZNF76	1.27665	1.26955	1.28764	1.19766	1.38353	0.953649	1.26955	1.26537	1.26955
7992877	zinc finger protein 75a /// hypothetical protein LOC100128510	ZNF75A /// LOC100128510	0.874289	0.885639	0.885639	0.924513	0.795686	1.13161	0.738788	1.2353	0.832684
7992887	zinc finger protein 75a /// hypothetical protein LOC100128510	ZNF75A /// LOC100128510	0.903127	0.853638	0.724088	0.899686	0.764378	0.718288	0.783851	0.820759	0.765287
8019541	zinc finger protein 750	ZNF750	1.21506	0.978985	1.19384	1.21642	1.15998	1.35205	1.2112	1.25625	1.28223
8175319	zinc finger protein 75 (D8C6)	ZNF75	0.888114	0.889705	1.15901	0.922803	0.922803	1.00585	0.922803	0.889441	0.955985
8031748	zinc finger protein 749 /// similar to Major histocompatibility complex, class II, DR beta 4 /// similar to major histocompatibility complex, class II, DQ beta 1 /// similar to HLA class II histocompatibility antigen, DR-W53 beta chain /// similar to hCG1992647 /// major histocompatibility complex, class II, DQ beta 1 /// major histocompatibility complex, class II, DQ beta 2 /// major histocompat…	ZNF749 /// LOC100133484 /// LOC100133583 /// LOC100133661 /// LOC100133811 /// HLA-DQB1 /// HLA-DQB2 /// HLA-DRB1 /// HLA-DRB2 /// HLA-DRB3 /// HLA-DRB4 /// HLA-DRB5 /// RNASE2 /// LOC730415 /// hCG_1998957	0.941535	0.724714	0.690821	0.603885	0.591666	0.768196	0.808031	0.729045	0.723588
8000903	zinc finger protein 747	ZNF747	3.22203	3.04875	3.08845	2.96844	3.16546	3.5766	3.34869	2.81097	3.5991
8143725	zinc finger protein 746	ZNF746	3.76234	3.36968	3.06454	3.35017	3.66011	3.72241	3.54892	3.30341	3.79397
7955721	zinc finger protein 740	ZNF740	1.83511	1.69576	1.67994	1.77558	1.63028	1.70311	1.53326	1.79806	1.70491
8071382	zinc finger protein 74	ZNF74	1.70658	1.9552	1.77579	1.96104	1.86591	1.90572	1.83455	2.0222	1.88741
8027297	zinc finger protein 738	ZNF738	0.81221	0.806711	0.764772	0.756485	0.795972	0.836616	0.723397	0.887201	0.74916
7995252	zinc finger protein 720	ZNF720	0.853737	0.894335	0.939454	0.857541	1.09385	1.01048	1.25754	1.01048	0.857541
8093320	zinc finger protein 718 /// zinc finger protein 595	ZNF718 /// ZNF595	0.824812	0.864311	0.864311	0.912372	0.937768	0.834805	0.977437	0.879497	0.968631
8088911	zinc finger protein 717	ZNF717	0.798401	0.909453	0.881363	0.777216	0.798401	0.798401	0.798401	0.830357	0.707469
8133018	zinc finger protein 716	ZNF716	0.851564	0.652053	0.995317	0.81239	0.450064	0.82972	0.718061	0.924078	0.84071
8027285	zinc finger protein 714	ZNF714	1.23043	0.943293	1.16154	0.943293	0.708903	0.763892	0.955915	1.10221	0.954556
8132917	zinc finger protein 713	ZNF713	0.756253	0.812717	0.90007	0.895618	0.792563	0.971632	0.812717	0.792563	0.580853
8168589	zinc finger protein 711	ZNF711	0.743642	0.755495	0.7734	0.879384	0.900826	0.652053	1.10546	0.651085	0.820368
7985924	zinc finger protein 710	ZNF710	1.44898	1.71703	1.82689	1.99918	1.64725	1.62888	1.87307	1.74095	2.11425
8031675	zinc finger protein 71	ZNF71	1.99151	1.53062	1.94918	1.92957	2.03499	1.85263	1.95098	2.03099	2.046
8034395	zinc finger protein 709 /// zinc finger protein 564	ZNF709 /// ZNF564	0.756253	0.801297	0.871025	0.81218	0.992462	0.796544	0.721439	0.756253	0.680862
8035803	zinc finger protein 708	ZNF708	0.770181	0.880797	0.974924	0.770181	0.770181	0.73437	0.770181	0.770181	0.71704
8148662	zinc finger protein 707	ZNF707	1.30026	1.13026	1.45487	1.13236	1.0736	1.28028	1.30026	1.31609	1.30026
8152111	zinc finger protein 706	ZNF706	0.886456	0.860939	0.89278	0.816724	0.751153	0.723645	0.678744	0.884585	1.09736
7953733	zinc finger protein 705A	ZNF705A	0.652871	0.73477	0.4927	0.730054	0.895714	1.64687	0.791128	0.945961	0.626245
8151496	zinc finger protein 704	ZNF704	0.851564	1.02064	0.858416	1.09314	1.02064	0.69094	1.08651	0.768335	0.863571
8145829	zinc finger protein 703	ZNF703	3.2201	3.36918	3.00733	2.5207	2.75309	2.81246	2.82706	2.82847	2.984
8039025	zinc finger protein 702	ZNF702	0.9028	0.666342	0.788137	0.832187	0.86969	0.647817	0.613987	0.668991	0.631239
8030950	zinc finger protein 701	ZNF701	0.906547	0.913301	0.735015	0.743215	0.891666	0.985267	0.726574	0.929693	0.763703
8025973	zinc finger protein 700	ZNF700	0.73485	1.02916	1.09593	0.782	0.794268	0.768196	0.768196	0.798401	0.511099
8074931	zinc finger protein 70	ZNF70	0.902301	1.108	1.4923	1.24805	1.27892	1.09659	1.15653	1.23024	1.07873
8148941	zinc finger protein 7	ZNF7	1.22997	1.07835	1.07011	0.899079	1.08611	0.955819	0.985242	1.16968	0.864014
8033746	zinc finger protein 699	ZNF699	0.757433	0.748337	0.740324	0.806726	0.742464	0.693393	0.725896	0.80258	0.76398
7919051	zinc finger protein 697	ZNF697	1.57473	1.76196	1.90353	1.60657	1.701	1.60761	1.54914	1.87254	1.79787
8148615	zinc finger protein 696	ZNF696	1.81752	2.00024	2.3174	2.25667	1.77761	1.85726	1.72447	1.77761	1.64031
7925662	zinc finger protein 695	ZNF695	0.839621	0.988051	0.632875	0.6975	0.851564	0.768196	1.14393	0.851564	0.878198
7925773	zinc finger protein 692	ZNF692	1.39651	1.49848	1.54581	1.3558	1.4479	1.38481	1.61817	1.52785	1.46431
7900624	zinc finger protein 691	ZNF691	1.12509	1.33806	1.50288	1.44451	1.22985	1.39556	1.22951	1.37247	1.23784
8025968	zinc finger protein 69	ZNF69	1.28987	1.52307	1.23666	1.38102	1.28329	1.67248	1.1632	1.45613	1.48479
8000924	zinc finger protein 689	ZNF689	1.68808	1.93494	1.88564	1.75363	1.95892	1.73433	2.17231	1.9457	1.96345
8000910	zinc finger protein 688	ZNF688	1.24244	1.23076	1.20602	1.28558	1.17305	1.31466	1.02681	1.15683	1.19442
7905382	zinc finger protein 687	ZNF687	1.84497	2.56368	1.92083	1.82756	1.59987	1.97093	1.81475	1.98518	2.1036
7900461	zinc finger protein 684	ZNF684	0.943293	0.880183	0.96773	0.721231	0.723168	0.808031	0.881937	0.808031	0.820653
7913965	zinc finger protein 683	ZNF683	1.18402	1.15618	1.18402	1.39511	1.18402	1.18402	1.04536	1.11217	1.18402
8035782	zinc finger protein 682	ZNF682	0.802424	0.881799	1.0497	0.943338	0.802424	0.753789	0.802424	0.934068	0.781239
8035855	zinc finger protein 681	ZNF681	0.64906	0.817624	0.750671	0.691655	0.816036	0.647686	0.821858	0.755831	0.722224
8139820	zinc finger protein 680	ZNF680	0.968747	0.768309	0.818137	0.871971	0.886186	0.883223	0.869533	0.688353	1.13371
8133042	zinc finger protein 679	ZNF679	0.79043	0.857176	0.917055	0.86439	0.920864	0.954042	0.920864	1.09576	0.964575
7910190	zinc finger protein 678	ZNF678	1.14379	1.03879	0.977662	0.836127	0.791396	0.850933	0.891465	0.756645	1.00357
8039070	zinc finger protein 677	ZNF677	0.939805	0.833652	1.0154	1.13413	0.8222	1.16878	0.911027	0.911027	0.911027
8035825	zinc finger protein 676	ZNF676	0.851564	0.851564	0.735015	0.860534	0.851564	0.799732	0.875965	0.851564	1.03468
8035847	zinc finger protein 675	ZNF675	0.87431	0.790942	0.713566	0.790942	0.790942	0.80991	0.790942	0.703221	0.790942
8172274	zinc finger protein 674	ZNF674	0.742246	0.746818	0.629241	0.781636	0.802598	0.53882	0.908946	0.772857	0.795818
8166989	zinc finger protein 673	ZNF673	0.866587	0.866587	0.866587	0.696644	1.41271	0.967679	1.02995	0.978678	0.733492
7911289	zinc finger protein 672	ZNF672	1.50722	1.92963	1.35075	1.47052	1.81491	1.79303	1.53418	1.41173	1.53097
8039680	zinc finger protein 671	ZNF671	1.04256	0.755599	1.04256	1.34196	0.927892	1.01048	1.22266	0.849079	0.816586
7925672	zinc finger protein 670	ZNF670	0.878225	0.859545	0.831454	0.753197	1.00484	0.978418	0.899036	0.851564	0.814124
7925677	zinc finger protein 669	ZNF669	1.23984	0.873067	0.889956	0.887467	1.05213	0.995952	0.856938	0.802338	0.976186
7995030	zinc finger protein 668	ZNF668	1.18144	1.22554	1.07661	1.18791	1.05601	1.1485	0.934292	1.10256	0.926789
8000974	zinc finger protein 668	ZNF668	1.05252	0.933154	1.1438	1.40428	1.14739	1.28006	1.43156	1.3332	1.22629
8039593	zinc finger protein 667	ZNF667	0.694988	0.938504	1.22013	0.861981	0.799521	0.92068	0.979761	0.843831	0.614143
8039062	zinc finger protein 665	ZNF665	0.753865	0.763386	0.614851	0.796265	0.744683	0.762823	0.761256	0.724939	0.762823
7959751	zinc finger protein 664	ZNF664	1.13948	1.21529	1.13952	1.28204	1.44133	1.32147	1.27144	1.20664	1.60243
8066739	zinc finger protein 663	ZNF663	0.898788	1.11706	0.6833	0.918319	0.863777	0.885911	1.01963	0.803524	0.873292
8079124	zinc finger protein 662	ZNF662	1.15932	1.06271	1.22806	1.09937	1.26428	1.52951	1.10299	1.22045	1.30213
8079198	zinc finger protein 660	ZNF660	0.833576	0.583388	0.735015	0.741728	0.850648	0.80604	0.944733	0.86526	0.825808
8027268	zinc finger protein 66	ZNF66	0.833089	0.836251	0.952853	1.0266	1.11399	0.597594	0.992771	0.942455	0.95759
8161319	zinc finger protein 658 /// zinc finger protein 658B /// zinc finger protein 658 pseudogene	ZNF658 /// ZNF658B /// LOC653501	0.975513	0.842009	0.791277	0.873272	0.842009	0.842009	0.821749	0.884552	0.844555
8161346	zinc finger protein 658 /// zinc finger protein 658B /// zinc finger protein 658 pseudogene	ZNF658 /// ZNF658B /// LOC653501	0.955711	0.808031	0.766877	0.824052	0.808031	0.808031	0.808031	0.849533	0.808031
8161326	zinc finger protein 658 /// zinc finger protein 658B /// zinc finger protein 658 pseudogene	ZNF658 /// ZNF658B /// LOC653501	1.06097	0.8952	0.88419	0.8952	0.8952	0.863389	0.8952	0.905699	0.914496
8134631	zinc finger protein 655	ZNF655	1.06002	1.20329	1.27036	1.04997	1.06963	1.03286	1.11462	1.10068	1.17141
8081069	zinc finger protein 654	ZNF654	0.723182	0.723182	0.701161	0.747758	0.851564	0.959391	0.849501	0.851564	0.723182
8034276	zinc finger protein 653	ZNF653	2.23071	2.27165	2.00081	2.27476	2.15642	1.98157	2.33209	2.25972	2.26903
8016546	zinc finger protein 652	ZNF652	1.14488	1.0497	1.20431	1.36789	1.0497	0.842818	0.929292	1.0497	1.06252
8038913	zinc finger protein 649	ZNF649	0.745398	0.898005	0.877602	0.972992	1.0045	0.738271	0.869915	0.853894	0.799614
7922686	zinc finger protein 648	ZNF648	1.11389	1.38058	1.07831	0.812826	1.46905	1.15132	1.15748	0.767121	1.22677
7995033	zinc finger protein 646	ZNF646	1.38974	0.948898	1.19729	1.45015	1.1559	0.928849	0.865033	1.17672	1.12099
8166433	zinc finger protein 645	ZNF645	0.849646	0.849646	0.758205	0.779585	0.522897	0.886658	0.865472	1.2196	0.695886
7917604	zinc finger protein 644	ZNF644	0.797748	0.795068	0.852192	0.920388	0.771273	0.900157	0.775092	0.75621	0.776365
7900438	zinc finger protein 643	ZNF643	1.32616	1.03277	1.02486	0.984043	0.943369	0.963671	1.30514	0.81593	0.936299
7900446	zinc finger protein 642	ZNF642	0.67455	0.74713	1.03341	1.11353	1.03771	1.00693	0.805914	0.86356	0.811297
7962794	zinc finger protein 641	ZNF641	1.01889	1.16069	0.887883	1.0083	1.07788	1.03189	1.01889	0.993019	1.1348
8084035	zinc finger protein 639	ZNF639	0.676796	0.651719	0.923033	0.826538	1.20013	0.686504	0.777183	0.851564	0.843978
8042601	zinc finger protein 638	ZNF638	1.00832	0.994674	0.892273	0.824422	0.699357	0.941046	0.73437	0.824422	0.908434
8172379	zinc finger protein 630 /// zinc finger protein 182	ZNF630 /// ZNF182	0.823387	0.832154	0.931365	0.829307	0.900426	0.915116	0.915116	0.915116	0.920271
8000941	zinc finger protein 629	ZNF629	1.24602	1.60816	1.81158	1.52773	1.44251	1.72238	1.32264	1.82406	1.56208
8031489	zinc finger protein 628	ZNF628	2.36723	2.21284	2.36725	2.21284	1.8393	2.10997	2.21284	2.32455	2.21284
8025927	zinc finger protein 627	ZNF627	1.23327	1.3976	1.23691	1.36789	1.21279	1.31534	1.34953	1.21279	1.12253
8035795	zinc finger protein 626	ZNF626	1.00064	0.900948	0.822463	0.748597	0.900948	1.06754	0.767474	0.900948	1.0497
8013035	zinc finger protein 624	ZNF624	0.816322	1.02351	0.913366	0.963765	1.06518	0.95928	1.06366	0.842949	0.975871
8148658	zinc finger protein 623	ZNF623	1.07956	0.802568	0.996306	1.17684	0.903461	0.810732	1.02566	0.935204	1.18916
8111129	zinc finger protein 622	ZNF622	0.940932	1.01048	1.0497	1.03323	0.763105	1.01048	1.00309	1.01048	1.13236
8079005	zinc finger protein 621	ZNF621	0.894571	0.702813	0.894571	1.13835	0.859568	0.890715	0.894571	0.862512	0.845563
8078999	zinc finger protein 620	ZNF620	0.983324	0.974766	0.912108	1.07787	1.2743	0.955534	1.00921	1.11359	0.969701
8078991	zinc finger protein 619	ZNF619	1.09824	0.938291	0.892322	1.14416	0.929976	0.822443	0.929144	0.82504	0.776144
8157381	zinc finger protein 618	ZNF618	1.07537	0.845951	1.01374	0.988048	1.15199	0.807929	1.12561	0.879617	0.870074
8157362	zinc finger protein 618	ZNF618	1.11035	1.06093	1.06093	1.1427	0.899971	1.06093	0.987028	1.06093	1.06093
8038954	zinc finger protein 616	ZNF616	0.911892	0.668435	0.72608	0.820014	0.836292	0.824439	1.13357	0.835156	0.815752
8038952	zinc finger protein 616	ZNF616	0.627266	0.71634	0.643573	0.757086	0.68373	0.620508	0.68373	0.589428	0.817204
8038925	zinc finger protein 615	ZNF615	0.831454	0.846477	0.831454	0.831454	0.831454	1.03844	0.823767	0.831454	0.786846
8038933	zinc finger protein 614 /// zinc finger protein 432	ZNF614 /// ZNF432	0.66846	0.92428	0.782763	1.04939	0.750177	1.18166	1.01272	0.738217	0.817716
8030871	zinc finger protein 613	ZNF613	0.884378	0.910523	0.73957	0.845821	1.01427	0.829045	0.941733	0.694392	0.921923
8038981	zinc finger protein 611	ZNF611	0.719991	0.699203	0.878605	0.634723	0.810255	0.710614	0.735015	0.646187	0.846698
8030914	zinc finger protein 610	ZNF610	0.844889	0.962266	0.844889	0.825838	0.877539	0.855646	0.836412	0.808518	0.851552
7984203	zinc finger protein 609	ZNF609	1.38715	1.28022	1.33987	1.27263	1.32629	0.97466	1.26253	1.20047	1.28324
8113761	zinc finger protein 608	ZNF608	0.883728	1.07897	1.00562	1.02826	0.93702	1.35354	1.05596	0.966641	0.856699
8036436	zinc finger protein 607	ZNF607	1.0866	0.675433	0.795547	0.905846	0.817887	0.863564	1.07659	0.817887	0.675451
8039719	zinc finger protein 606	ZNF606	1.09167	1.10247	1.20745	1.09167	1.26804	0.932825	1.14688	1.15125	0.966006
7967863	zinc finger protein 605	ZNF605	0.736971	0.763105	0.735015	0.684603	0.680362	0.759375	0.915116	0.913981	0.577608
8038989	zinc finger protein 600	ZNF600	0.82089	0.947226	0.822016	0.83616	1.0954	1.0557	0.813166	0.720685	0.82089
8036038	zinc finger protein 599	ZNF599	0.782269	0.799726	0.839712	0.801404	0.778658	0.652709	0.944744	0.746463	0.771814
7998679	zinc finger protein 598	ZNF598	2.08355	2.17401	1.82667	1.9466	2.27837	2.09466	2.03095	2.0808	2.42696
7998978	zinc finger protein 597	ZNF597	0.772826	0.739188	0.611066	0.89711	0.634391	0.928353	0.907533	0.813188	0.794574
8144230	zinc finger protein 596	ZNF596	0.897931	1.04911	0.730656	1.07299	0.863972	0.768809	0.718061	0.726297	0.789063
8011823	zinc finger protein 594	ZNF594	0.702792	1.13668	0.869521	0.769026	0.742739	0.890715	0.842916	1.13219	0.754208
7899096	zinc finger protein 593	ZNF593	2.18583	1.82596	2.15968	2.50632	2.18302	1.85563	2.14583	2.14797	2.14797
7985605	zinc finger protein 592	ZNF592	1.5432	1.86943	1.5878	1.32513	1.33789	1.36842	1.68203	1.59313	1.40164
8079598	zinc finger protein 589	ZNF589	0.718675	0.819764	0.788387	1.14096	0.833023	0.83559	0.885091	0.913699	0.875546
8031815	zinc finger protein 587 /// zinc finger protein 551 /// zinc finger protein 776	ZNF587 /// ZNF551 /// ZNF776	0.812095	0.782464	0.839428	0.810455	0.79728	0.893117	0.818363	0.834033	0.800521
8031825	zinc finger protein 587	ZNF587	1.54143	1.70029	1.36156	0.672272	0.925862	1.26991	0.94795	0.798639	0.537083
8031827	zinc finger protein 587	ZNF587	0.796089	0.764764	1.00617	0.999869	0.68373	0.851564	0.782402	0.841706	0.851564
8031837	zinc finger protein 587	ZNF587	1.43261	1.25396	1.02139	1.17522	0.719824	1.05729	1.16569	1.18392	0.878549
8031821	zinc finger protein 586	ZNF586	1.14449	1.16965	0.90792	1.10524	1.04095	0.909555	1.03166	1.09987	1.00694
8036389	zinc finger protein 585B	ZNF585B	1.0599	0.923314	1.20991	1.0599	1.28963	1.05093	0.998302	1.06152	0.856719
8036373	zinc finger protein 585A	ZNF585A	0.844331	0.760796	0.899686	0.894594	1.01074	0.995049	0.899686	0.922803	0.899686
8031939	zinc finger protein 584 /// zinc finger protein 324B	ZNF584 /// ZNF324B	1.79398	1.40799	1.64152	1.3843	1.72378	1.76689	1.43254	1.65097	1.65097
8031640	zinc finger protein 583	ZNF583	0.926446	0.987433	0.82817	1.06736	0.845812	1.06485	0.894669	0.909075	1.0778
8039586	zinc finger protein 582	ZNF582	1.04532	1.14681	0.974379	1.11654	0.909541	0.817345	1.2952	1.04327	1.02738
8031522	zinc finger protein 581	ZNF581	1.90421	1.98477	1.89006	1.96934	2.37536	1.99183	1.98477	2.14684	1.88894
8031516	zinc finger protein 580 /// zinc finger protein 581	ZNF580 /// ZNF581	4.94887	5.41557	4.98724	4.63358	4.52576	4.76419	4.61921	4.86524	5.04717
8039524	zinc finger protein 579	ZNF579	2.95761	3.38178	3.24002	3.0967	3.19836	3.0711	3.09543	2.99656	3.09155
8030944	zinc finger protein 578 /// zinc finger protein 528	ZNF578 /// ZNF528	0.318579	0.652053	0.643573	0.403283	0.98939	0.832402	0.531599	0.752069	0.920924
8038904	zinc finger protein 577	ZNF577	0.869326	0.811533	0.88536	0.905308	1.0497	0.801009	1.08191	1.11258	0.913326
8029311	zinc finger protein 576	ZNF576	1.45182	1.67712	1.88798	1.51642	1.49659	1.48011	1.49659	1.38607	1.33604
8029301	zinc finger protein 575	ZNF575	2.57812	2.67652	2.4007	3.01867	2.57812	2.36615	2.62305	2.94707	2.57812
8029182	zinc finger protein 574	ZNF574	0.919224	0.841998	1.44584	1.15844	0.97519	1.07878	1.45606	1.37815	1.51913
8036444	zinc finger protein 573	ZNF573	0.748737	0.807549	0.842666	0.921653	0.764601	0.766131	0.812636	0.928333	0.681144
8148276	zinc finger protein 572	ZNF572	0.798401	0.798401	0.798401	0.969557	0.881769	0.798401	0.781071	0.717157	0.798401
8036406	zinc finger protein 571	ZNF571	0.851564	0.851564	1.10365	1.14025	0.723954	0.88437	0.834234	1.02836	0.661537
8028248	zinc finger protein 570	ZNF570	0.832675	0.980751	0.988322	1.02524	0.874726	0.915116	0.915116	0.87275	0.79911
8024532	zinc finger protein 57	ZNF57	1.15292	1.19438	0.892337	0.963562	1.00177	0.725637	1.18676	1.1812	0.734661
8036395	zinc finger protein 569	ZNF569	0.866798	0.937707	0.926176	1.12603	1.04768	0.941319	0.992914	0.825144	0.922243
8028213	zinc finger protein 568	ZNF568	0.750177	0.866587	0.849593	0.713523	1.04879	0.789328	1.01521	0.841906	0.841906
8028200	zinc finger protein 567	ZNF567	0.82477	0.673799	0.852047	0.67062	0.862324	0.833435	0.82477	0.876682	0.735837
8036318	zinc finger protein 566	ZNF566	0.956983	0.863704	0.783945	0.846041	0.637391	0.555198	0.924442	0.922429	0.992756
8036291	zinc finger protein 565	ZNF565	0.803022	0.738797	0.801964	0.915151	1.11296	0.803681	0.859302	0.932922	0.875925
8034401	zinc finger protein 564	ZNF564	1.04769	0.994775	0.851952	1.13236	0.760291	0.784541	0.867502	0.83415	0.807837
8034370	zinc finger protein 563	ZNF563	0.845447	0.870093	0.828903	0.864483	0.863422	1.09932	0.985328	0.729972	0.752545
8033801	zinc finger protein 562	ZNF562	1.32752	1.12702	1.08451	1.066	1.115	0.90779	1.07566	1.45274	1.12434
8033795	zinc finger protein 561	ZNF561	0.847602	0.998449	0.922803	1.01294	0.851564	0.941771	1.10737	0.829611	0.98858
8033767	zinc finger protein 560	ZNF560	0.747036	0.775015	0.761789	0.930326	0.991679	0.726795	0.669223	0.749284	0.805935
8027239	zinc finger protein 56	ZNF56	0.907794	0.726198	0.654112	0.816206	0.78669	1.00445	0.554181	0.807878	0.742867
8025478	zinc finger protein 559	ZNF559	0.895472	0.924831	0.759412	0.911692	0.93066	1.22148	0.915116	1.06257	0.777812
8033667	zinc finger protein 558	ZNF558	0.915116	0.911261	1.22934	0.915116	0.930421	0.979428	0.915116	0.915116	1.11593
8025132	zinc finger protein 557	ZNF557	1.09731	0.839606	1.07977	0.893074	0.949738	0.84621	0.727133	1.03052	0.857111
8024527	zinc finger protein 556	ZNF556	0.987545	0.850454	0.850454	1.08518	1.0673	0.767493	0.824036	0.663695	0.850454
8024518	zinc finger protein 555	ZNF555	0.909013	0.982495	1.11043	0.984813	1.13453	1.07405	0.982309	0.936145	1.00681
8024511	zinc finger protein 554	ZNF554	1.02138	0.76373	0.957494	1.10979	0.840158	0.883346	1.05075	0.96785	0.95321
7994813	zinc finger protein 553	ZNF553	1.1579	0.960042	0.964893	0.84705	0.910548	1.16326	0.964111	0.929531	0.990344
8039687	zinc finger protein 552	ZNF552	0.765977	0.863886	0.85724	1.1045	0.88134	0.847313	0.834315	0.992351	0.847313
8031807	zinc finger protein 551	ZNF551	0.784396	0.83413	0.83413	0.8168	0.849435	0.83413	0.83413	0.745303	0.83413
8039655	zinc finger protein 550	ZNF550	0.968905	0.81624	1.22205	1.01338	0.884381	0.882319	0.924098	0.979587	0.893538
8031762	zinc finger protein 549	ZNF549	1.01431	1.0241	1.05299	1.10751	1.06126	0.948565	1.12136	0.797964	1.11131
8028770	zinc finger protein 546	ZNF546	0.790942	0.917383	0.684051	0.796157	0.790942	0.746333	1.02637	0.790942	0.785001
8036309	zinc finger protein 545	ZNF545	0.711732	0.768196	0.768196	0.839111	0.768196	0.771307	0.813123	0.824448	0.65773
8031884	zinc finger protein 544	ZNF544	0.912515	0.994654	0.951171	1.12711	1.42386	1.28454	1.06066	1.12329	0.932237
8031720	zinc finger protein 543	ZNF543	0.853969	0.83705	1.05076	0.931484	1.08467	0.885107	0.791548	0.899858	0.773805
8031632	zinc finger protein 542	ZNF542	0.844712	0.851564	0.914822	0.849017	0.851564	0.851564	0.86739	0.851564	0.851564
8037931	zinc finger protein 541	ZNF541	0.975173	0.978599	0.986408	1.03933	0.897344	0.876283	0.978599	1.12213	0.794189
8028266	zinc finger protein 540	ZNF540	0.692984	0.686763	0.855036	0.728258	0.792298	0.838634	0.711322	0.831063	0.744561
8027431	zinc finger protein 536	ZNF536	0.662552	0.677412	0.869381	0.741811	0.50532	1.20383	0.747636	0.671946	0.74749
8030939	zinc finger protein 534 /// zinc finger protein 528	ZNF534 /// ZNF528	1.11247	1.1159	1.29752	1.1979	1.0697	1.11247	0.94168	0.952085	1.15763
8021442	zinc finger protein 532	ZNF532	1.90312	2.26516	2.07903	1.72165	1.94547	1.59848	2.09581	2.71308	2.7165
8031778	zinc finger protein 530	ZNF530	0.916489	0.965896	1.23679	0.843226	0.927477	0.708491	1.11989	1.18883	0.950214
8036333	zinc finger protein 529	ZNF529	0.799572	0.795717	1.0497	0.927962	0.782081	0.999645	0.937488	0.872034	0.872034
8030931	zinc finger protein 528	ZNF528	0.831009	0.836077	0.833209	0.648536	0.876198	0.892461	0.841485	0.738229	0.773758
8028241	zinc finger protein 527	ZNF527	1.08044	0.883367	0.846584	0.901698	1.15132	0.975678	1.31484	1.00395	0.907415
8029188	zinc finger protein 526	ZNF526	1.3139	1.3139	1.37287	1.3054	1.3139	1.16465	1.13715	1.66513	1.45589
8031511	zinc finger protein 524	ZNF524	2.62147	2.43078	3.09467	2.78886	2.93288	2.32688	2.74504	3.01707	2.61337
8022612	zinc finger protein 521	ZNF521	0.988025	0.988025	1.19935	1.28167	0.928153	1.04763	0.988025	0.979878	0.828011
8022420	zinc finger protein 519	ZNF519	0.711768	0.741407	0.94489	1.0982	1.0497	0.816395	0.816395	0.868426	0.654555
8099364	zinc finger protein 518B	ZNF518B	0.756253	0.815753	0.831454	0.807956	0.900572	0.819476	1.01048	0.851564	0.864388
7929562	zinc finger protein 518A	ZNF518A	0.76016	0.786019	0.921912	0.863346	0.791771	0.983573	0.898566	0.784426	0.685555
8148932	zinc finger protein 517	ZNF517	2.06031	1.88549	2.05045	1.8934	1.96127	1.89472	1.75281	1.94899	1.85799
8023882	zinc finger protein 516	ZNF516	1.88988	1.82913	1.76784	1.7152	2.07226	1.48774	1.97027	2.04393	1.84503
8053775	zinc finger protein 514	ZNF514	0.933716	0.978955	1.10063	1.24149	0.975004	1.00391	0.918048	0.986977	0.979776
8051113	zinc finger protein 513	ZNF513	2.41268	3.20192	2.33634	2.4774	2.17454	2.31037	2.43857	2.55598	2.50084
8067773	zinc finger protein 512B	ZNF512B	1.25561	1.70179	1.33943	1.36789	1.5674	1.36789	1.34996	1.38372	1.2133
8040985	zinc finger protein 512	ZNF512	0.968613	0.923044	1.09012	0.999869	0.789223	0.980557	0.881006	1.06896	0.930421
7931561	zinc finger protein 511	ZNF511	1.86479	1.678	1.60974	1.27357	1.44736	1.57746	1.8021	1.6276	1.8075
8162631	zinc finger protein 510	ZNF510	0.852041	1.17614	0.850006	1.24211	0.969375	1.02257	0.876772	0.875631	0.741056
8093829	zinc finger protein 509	ZNF509	0.952477	1.02679	1.11896	1.02182	1.29509	1.01534	1.02182	0.876014	0.943293
8027439	zinc finger protein 507	ZNF507	0.783401	0.761174	0.652884	0.831588	0.836753	0.783401	0.915116	0.738865	0.841908
8035773	zinc finger protein 506	ZNF506	0.892165	0.884851	0.811821	0.790942	0.821876	0.859297	0.888723	0.821876	0.821876
7934553	zinc finger protein 503	ZNF503	1.76768	1.73834	1.91883	2.01966	1.95496	2.40899	2.00534	1.99775	1.77775
8079224	zinc finger protein 502	ZNF502	0.74329	0.74329	0.520807	0.795122	0.938947	0.972299	0.690149	0.806655	0.678273
8079229	zinc finger protein 501	ZNF501	0.718998	1.00382	0.808994	0.837282	1.08874	0.712128	0.874143	0.824972	0.880257
7999196	zinc finger protein 500	ZNF500	1.46452	1.48599	1.6898	1.48599	1.50839	1.48599	1.40958	1.35459	1.44576
8134644	zinc finger protein 498	ZNF498	1.76925	1.75008	1.28383	1.24775	1.79008	1.29339	1.07115	1.94192	1.26521
7925705	zinc finger protein 496	ZNF496	2.22418	1.53241	1.66966	1.79428	1.80262	1.97103	1.51712	1.79428	2.20397
8027304	zinc finger protein 493	ZNF493	0.773782	0.796172	0.712041	0.848901	0.788264	0.892591	0.713396	0.735375	0.796172
8035831	zinc finger protein 492 /// zinc finger protein 98 (F7175)	ZNF492 /// ZNF98	1.47233	1.09147	0.893818	0.999869	0.876016	0.987991	1.14934	0.987991	1.16818
8027345	zinc finger protein 492	ZNF492	1.01284	0.895766	1.25659	1.05021	0.644046	0.768196	1.06564	0.763105	0.714125
8025951	zinc finger protein 491	ZNF491	1.25624	0.985179	1.17866	0.999869	0.950175	1.08912	0.833128	1.20091	0.674812
8034408	zinc finger protein 490	ZNF490	0.812075	0.837964	0.94494	0.927337	0.95913	0.837964	0.817797	0.791925	0.858272
7927383	zinc finger protein 488	ZNF488	1.11185	1.25655	1.21214	1.19766	1.11185	1.11185	0.915116	1.17159	1.03335
7927169	zinc finger protein 487	ZNF487	0.708688	0.723635	1.0067	0.851877	0.554555	1.81685	1.07229	0.50817	0.403328
8027260	zinc finger protein 486	ZNF486	0.763105	0.763105	0.645328	0.684603	0.748414	0.763105	0.719815	0.816246	0.900808
7927173	zinc finger protein 485	ZNF485	0.724703	0.709704	0.790271	1.07782	0.720522	1.04307	0.702445	0.874826	0.569312
8162449	zinc finger protein 484	ZNF484	0.729291	0.994654	0.886973	0.939198	0.818538	0.852716	0.993416	0.752614	1.04217
8157193	zinc finger protein 483	ZNF483	0.898089	0.866587	0.833722	0.978566	0.925911	0.894233	0.824872	0.878013	0.739765
8030908	zinc finger protein 480	ZNF480	0.815227	0.866587	0.793989	0.755202	0.742705	0.882413	0.864429	0.765812	0.948701
8139800	zinc finger protein 479 /// zinc finger protein 479 pseudogene	ZNF479 /// LOC643955	0.961958	0.96939	0.907522	0.907522	0.843524	0.985425	0.907522	0.81178	0.799216
8133023	zinc finger protein 479 /// zinc finger protein 479 pseudogene	ZNF479 /// LOC643955	0.915116	0.945613	0.915116	0.915116	0.835058	0.982625	0.915116	0.82371	0.776868
8139772	zinc finger protein 479	ZNF479	1.22803	0.632411	0.572865	1.29952	0.756082	0.718606	0.823331	0.67412	0.755297
8107591	zinc finger protein 474	ZNF474	0.854352	0.774369	0.779506	0.703885	0.842147	0.786495	0.863333	0.779506	0.683623
8030569	zinc finger protein 473	ZNF473	1.16169	1.12109	1.11064	1.10401	1.03884	1.12109	1.18655	1.14918	1.19103
8031650	zinc finger protein 471	ZNF471	0.895676	0.747282	0.782997	0.918781	0.68373	0.891174	0.975512	0.732259	0.669332
8031669	zinc finger protein 470	ZNF470	0.921759	0.776882	0.729693	0.939263	0.958479	0.92147	0.868869	0.717923	0.735776
7997765	zinc finger protein 469	ZNF469	2.07797	1.70913	1.85657	1.68948	1.82872	1.68237	1.5745	2.157	2.01652
8038998	zinc finger protein 468	ZNF468	0.751369	0.867463	0.732648	0.867183	1.10969	0.91402	0.885073	0.792418	0.840114
8143749	zinc finger protein 467	ZNF467	2.99382	3.85747	2.99087	2.18309	2.57345	2.59621	2.35315	2.60813	2.70074
8157105	zinc finger protein 462	ZNF462	0.906854	1.32306	1.07327	0.938452	1.21956	1.20328	1.09633	0.963705	1.17797
8036341	zinc finger protein 461	ZNF461	0.767196	0.928832	0.702699	0.836842	1.22927	0.852346	0.915116	0.949925	0.836842
8031714	zinc finger protein 460	ZNF460	1.19511	1.22052	1.58235	1.14487	1.29576	1.19777	1.20356	1.26498	1.28629
8110478	zinc finger protein 454	ZNF454	1.15657	1.14393	1.18195	1.33542	0.997333	1.08233	1.14393	1.33089	1.13817
8124594	zinc finger protein 452	ZNF452	1.03123	1.01936	0.975311	1.332	1.08615	1.35889	0.849926	1.03123	1.04546
8120382	zinc finger protein 451 /// KIAA1702 protein	ZNF451 /// KIAA1702	1.017	1.00133	0.820667	0.850876	0.841906	0.841906	0.911904	0.851564	0.790546
8037433	zinc finger protein 45	ZNF45	0.634968	0.829584	0.970869	1.13952	0.77694	0.847743	0.672395	0.618792	0.788266
8170015	zinc finger protein 449	ZNF449	0.839179	0.820242	0.899117	0.861766	0.915952	0.830808	0.839179	0.755415	0.830588
8031962	zinc finger protein 446	ZNF446	2.98982	3.06666	2.96497	3.27483	2.98982	3.0725	3.09251	3.05071	2.83894
8086482	zinc finger protein 445	ZNF445	0.865854	1.10849	0.932084	0.949388	0.881303	1.04886	0.996818	0.866395	1.1353
8031617	zinc finger protein 444	ZNF444	2.27833	2.12307	2.64722	2.35133	2.41391	2.4585	2.38325	2.5461	3.10632
8034393	zinc finger protein 443	ZNF443	1.13118	0.640714	0.831454	1.09642	0.797561	1.19836	1.11185	0.763105	0.830344
8034379	zinc finger protein 442	ZNF442	0.936507	0.778396	1.13252	0.981063	0.913777	0.931579	1.05113	0.939665	0.852257
8025945	zinc finger protein 441	ZNF441	0.756253	0.799421	0.859291	0.846869	0.739658	0.799421	0.790942	0.826753	0.790942
8025958	zinc finger protein 440	ZNF440	0.50654	0.862884	0.910255	0.897833	0.925273	0.841906	0.808031	0.841906	0.892041
8034349	zinc finger protein 44	ZNF44	0.869132	1.08192	0.653979	0.86189	0.865145	0.855123	0.814076	0.841413	0.845025
8025964	zinc finger protein 439	ZNF439	0.756253	0.566319	0.831454	0.935302	0.836821	0.814928	0.718061	0.722358	0.65935
7932867	zinc finger protein 438	ZNF438	0.917089	0.718089	0.785853	0.734601	0.812295	0.785267	0.785267	1.11215	0.696405
7913582	zinc finger protein 436	ZNF436	1.11003	1.07317	1.2009	1.20783	1.1972	0.95897	1.21971	1.44311	1.38939
7998967	zinc finger protein 434	ZNF434	1.01566	1.08351	1.39566	1.50235	1.23962	1.03512	1.10553	0.899183	1.00336
8034320	zinc finger protein 433	ZNF433	0.787359	0.721047	0.851564	0.832596	0.851564	0.976188	0.866844	0.819315	0.855185
8038942	zinc finger protein 432	ZNF432	0.800428	0.962207	0.903444	0.903444	0.817003	0.912764	0.881678	0.892192	0.978941
8027292	zinc finger protein 431	ZNF431	0.785304	0.711389	0.686205	0.840779	0.917146	0.514073	0.788764	0.965046	1.26893
8027279	zinc finger protein 430	ZNF430	0.921763	0.71703	0.69736	1.10281	0.848971	0.898539	0.856084	0.848363	0.886143
8035813	zinc finger protein 43	ZNF43	0.731149	0.906194	0.763105	0.763105	0.673151	0.653951	0.763105	0.763105	0.763105
8027312	zinc finger protein 429	ZNF429	0.706996	0.740359	0.909042	0.760737	0.768196	0.955027	0.874605	0.665119	1.02696
8037355	zinc finger protein 428	ZNF428	1.14426	1.19725	0.898923	0.951582	0.946066	0.954302	0.974494	0.79573	0.995117
8033780	zinc finger protein 426	ZNF426	0.803588	0.876246	0.851564	0.851564	0.685931	0.910885	0.915116	0.851564	0.813829
8143702	zinc finger protein 425	ZNF425	0.950576	0.983249	0.937048	1.1158	1.09641	1.02188	1.02188	0.958465	1.12676
8001337	zinc finger protein 423	ZNF423	0.992787	0.911027	0.946016	0.927048	0.842231	0.85683	0.680378	0.922289	0.901159
8028219	zinc finger protein 420	ZNF420	0.87927	0.914403	0.87927	0.826902	0.927168	0.890715	0.840048	0.922803	0.87927
8031750	zinc finger protein 419	ZNF419	1.21227	0.893909	1.24684	1.22488	1.11801	0.787855	1.09624	1.2095	1.09624
8039698	zinc finger protein 418	ZNF418	0.915564	0.950666	1.1008	0.928076	0.958151	0.741739	1.10704	0.871507	0.833797
8039695	zinc finger protein 417	ZNF417	1.65027	1.0777	1.17788	1.51385	1.05567	1.57078	1.52875	0.946919	1.75519
8039664	zinc finger protein 416	ZNF416	1.14546	1.66241	1.42927	1.04529	1.30143	1.04926	0.984935	1.06409	1.07146
8039044	zinc finger protein 415	ZNF415	0.759391	0.866587	0.759391	0.714782	0.759391	1.01538	0.670536	0.759391	0.696974
8033598	zinc finger protein 414	ZNF414	3.73911	3.57946	3.2379	3.26113	3.40557	3.57858	3.8442	3.48729	3.49128
7975645	zinc finger protein 410	ZNF410	0.754456	0.888988	0.981834	0.883899	1.17706	0.913996	1.16178	0.888988	0.893849
8172307	zinc finger protein 41	ZNF41	0.806271	0.822249	0.919569	0.843968	0.720684	0.822249	0.760915	0.889272	0.774321
7978059	zinc finger protein 409	ZNF409	1.1008	1.0198	1.06294	1.26495	1.36152	1.1181	1.20166	1.37172	1.13623
7939699	zinc finger protein 408	ZNF408	0.667044	1.32125	1.16939	1.07365	1.09815	1.19781	1.09815	1.01048	1.01419
8021756	zinc finger protein 407	ZNF407	0.919252	0.899032	0.857663	0.849329	0.852279	0.922627	0.816878	0.857111	0.750556
8037430	zinc finger protein 404	ZNF404	0.745692	0.636823	0.851871	0.753904	0.827969	0.756591	0.715049	0.744446	0.835407
8137091	zinc finger protein 398	ZNF398	1.18705	1.28279	1.1617	1.06439	1.05213	1.14162	1.28249	1.19629	1.18705
8022872	zinc finger protein 397 opposite strand /// zinc finger protein 397	ZNF397OS /// ZNF397	1.01662	0.786434	1.09478	0.838859	0.976972	0.972665	0.881561	0.916231	1.14187
8020889	zinc finger protein 397	ZNF397	0.925531	0.860829	0.960737	0.850547	0.95619	1.00596	0.836754	0.956831	0.915792
8022892	zinc finger protein 396	ZNF396	0.832238	0.904124	0.885266	0.819285	0.848481	0.849754	0.882585	0.771968	0.927775
8149986	zinc finger protein 395 /// F-box protein 16	ZNF395 /// FBXO16	1.43532	1.73138	1.61652	1.57903	1.30191	1.73138	1.60055	1.70787	2.14527
8141305	zinc finger protein 394	ZNF394	0.953693	0.998222	0.855132	1.28366	0.90303	0.775521	0.900059	0.768196	0.768196
8117572	zinc finger protein 391	ZNF391	0.902626	0.921204	0.74656	0.934449	0.870169	0.811596	1.14314	0.936828	0.912516
8085774	zinc finger protein 385D	ZNF385D	0.683051	0.766903	1.06184	0.970105	0.860181	0.963646	0.795189	0.912313	0.862726
8015503	zinc finger protein 385C	ZNF385C	1.27951	1.30307	1.32583	1.5086	1.19435	1.19611	1.26292	1.49355	1.45242
8057418	zinc finger protein 385B	ZNF385B	1.44584	1.48928	1.78505	1.48928	1.50795	1.26289	1.64821	1.49989	1.36089
7963774	zinc finger protein 385A	ZNF385A	3.02637	3.26448	3.03062	2.91252	2.62408	2.96948	3.20827	2.96392	3.09121
7960666	zinc finger protein 384	ZNF384	1.96179	2.20254	1.90916	1.97933	1.87683	1.87368	2.04606	1.92351	2.1952
8028227	zinc finger protein 383	ZNF383	0.655908	0.734837	0.729573	0.789885	0.789885	0.917495	0.804061	0.744958	0.789885
8028194	zinc finger protein 382	ZNF382	0.786129	0.707452	0.774333	0.847846	0.761999	0.682478	0.746388	0.618373	0.680382
7933129	zinc finger protein 37B /// similar to zinc finger protein 37a (KOX 21)	ZNF37B /// LOC100129482	0.981939	1.23552	1.05659	1.17889	1.06169	1.06169	0.849519	1.21275	1.16212
7927071	zinc finger protein 37A	ZNF37A	0.826679	0.934197	0.826679	0.860827	0.926791	0.737553	0.871337	0.814387	0.826679
8162601	zinc finger protein 367	ZNF367	1.08215	1.14241	1.27061	1.09896	1.15132	1.21673	1.15132	1.06688	1.35326
8112584	zinc finger protein 366	ZNF366	1.04419	1.05807	1.08141	1.38739	1.14086	1.08538	1.17906	1.11404	1.28434
7927747	zinc finger protein 365	ZNF365	0.956005	0.851564	0.839455	0.809983	0.772763	0.851564	0.851564	0.851564	0.851564
7904830	zinc finger protein 364	ZNF364	0.638761	0.862803	0.845474	0.883006	0.815192	0.865987	0.86065	0.873859	1.06551
7899870	zinc finger protein 362	ZNF362	2.68793	3.24015	2.48252	2.52575	2.51154	2.39499	2.67106	2.90634	2.90311
8025179	zinc finger protein 358	ZNF358	3.50544	3.58422	3.20243	3.58127	3.50544	3.75617	3.50544	3.23113	3.82801
8110491	zinc finger protein 354C	ZNF354C	0.784546	0.866587	0.889602	0.943963	0.943963	0.967361	0.943963	0.943963	0.958776
8110463	zinc finger protein 354B	ZNF354B	0.847788	0.887719	1.18008	0.858121	0.911619	0.875674	0.830542	0.9037	0.980631
8116247	zinc finger protein 354A	ZNF354A	0.732715	0.768196	0.768196	0.768196	0.768196	0.768196	0.759346	0.744066	1.0305
8038919	zinc finger protein 350	ZNF350	0.740602	0.980121	0.766282	0.766282	0.733164	0.795406	0.849518	0.766282	0.8727
8079217	zinc finger protein 35	ZNF35	0.85282	0.884508	0.926153	0.903967	1.04132	0.772812	0.940821	0.891935	1.19422
8039054	zinc finger protein 347	ZNF347	0.652162	0.764231	0.877877	0.763105	0.748414	0.890715	0.808031	0.931774	0.72327
8110253	zinc finger protein 346	ZNF346	1.26643	1.47767	1.43428	1.29829	1.36853	1.18075	1.11746	1.36575	1.37495
8028206	zinc finger protein 345	ZNF345	0.856719	0.788369	0.887574	0.692408	0.856719	0.856719	1.01006	0.851564	0.856719
8064514	zinc finger protein 343	ZNF343	1.18797	0.804236	0.944343	0.940305	1.1246	0.851158	0.689146	0.913608	0.987219
8037495	zinc finger protein 342	ZNF342	2.22556	2.10255	2.04875	1.95288	1.85527	2.08669	2.10255	2.24025	2.30962
8061946	zinc finger protein 341	ZNF341	1.23347	1.36874	1.40479	1.58186	1.20392	1.40381	1.07594	1.27219	1.44674
8153896	zinc finger protein 34	ZNF34	0.97547	1.00337	1.04476	0.843974	0.992112	1.10613	1.07646	1.24297	1.14921
7933139	zinc finger protein 33B	ZNF33B	0.765137	1.24686	0.816764	0.888956	0.837164	0.696191	0.846146	0.830096	0.870826
7927062	zinc finger protein 33A	ZNF33A	1.31931	0.994654	0.982585	1.0898	0.982585	0.982585	0.718061	0.914164	1.06451
8065517	zinc finger protein 337	ZNF337	0.657112	0.884904	0.662837	1.02702	0.846362	0.884341	1.08163	1.01221	0.727004
8066641	zinc finger protein 335	ZNF335	1.66852	1.34416	1.29703	1.38285	1.31379	1.23042	1.23958	1.26809	1.34964
8066745	zinc finger protein 334	ZNF334	0.755312	0.791267	0.851564	0.958776	0.930421	0.851564	0.724055	0.874009	0.690364
8026365	zinc finger protein 333	ZNF333	1.09089	0.865576	1.13534	1.08704	1.05794	1.08176	0.890211	1.14834	1.19107
8030999	zinc finger protein 331	ZNF331	1.04084	0.849546	1.26573	0.916042	0.899792	1.00754	1.00726	1.08044	1.08766
8097543	zinc finger protein 330	ZNF330	0.958455	0.786795	0.841906	1.10676	0.982752	0.841906	0.841906	0.841906	0.668744
8039740	zinc finger protein 329	ZNF329	1.00265	0.852056	1.10559	0.954556	0.785118	0.951836	0.971507	0.883831	1.15109
7902891	zinc finger protein 326	ZNF326	0.692182	0.689375	0.869265	0.777834	0.876969	0.777834	0.911286	0.837055	0.714612
8031949	zinc finger protein 324B /// zinc finger protein 584	ZNF324B /// ZNF584	1.67052	1.68554	1.94271	1.52284	1.67052	1.81315	1.71482	1.52444	1.67052
8031956	zinc finger protein 324	ZNF324	1.1981	1.1981	1.01422	1.1981	1.19396	1.63961	1.05363	1.18307	1.1981
8124562	zinc finger protein 323	ZNF323	1.01505	1.23599	0.940353	0.927635	1.01547	0.920093	1.17345	1.02893	1.43946
8124459	zinc finger protein 322A /// zinc finger protein 322B	ZNF322A /// ZNF322B	0.866578	0.793504	0.714169	0.959697	0.764142	0.768196	0.840953	0.682827	0.697737
8162669	zinc finger protein 322A /// zinc finger protein 322B	ZNF322A /// ZNF322B	0.867884	0.801076	0.733888	0.917724	0.768196	0.768196	0.792633	0.747706	0.761504
8039013	zinc finger protein 321	ZNF321	0.865078	0.865078	0.929109	0.846101	0.894839	0.877412	0.869893	0.93015	0.773067
8039006	zinc finger protein 320	ZNF320	0.713466	0.779037	0.667512	0.846611	0.667086	0.764473	0.727034	0.680587	0.763823
7933186	zinc finger protein 32	ZNF32	0.951101	0.930655	1.1086	1.15381	0.9194	1.13709	0.855181	1.03857	1.0181
8001651	zinc finger protein 319	ZNF319	1.1475	1.1236	1.15132	0.988871	1.04602	1.01434	1.05561	1.28557	1.41199
8126542	zinc finger protein 318	ZNF318	1.05949	1.05949	1.1	1.05949	1.05949	0.963655	1.01048	1.05949	1.05949
8025458	zinc finger protein 317	ZNF317	1.09207	1.03263	1.04846	1.04846	0.749602	0.965091	1.04846	0.949841	1.14019
8063369	zinc finger protein 313	ZNF313	1.63303	1.37501	1.44878	1.25153	1.57192	0.969879	1.46458	1.40834	1.85966
8124622	zinc finger protein 311	ZNF311	0.86632	0.802874	0.87328	0.854567	0.809447	0.788204	0.795691	0.915162	1.02248
8178275	zinc finger protein 311	ZNF311	0.86632	0.802874	0.87328	0.854567	0.809447	0.788204	0.795691	0.915162	1.02248
8031726	zinc finger protein 304	ZNF304	0.851564	0.851564	0.773079	0.771953	0.77219	0.851564	0.864186	0.851564	0.855086
8027674	zinc finger protein 302	ZNF302	1.08084	0.888711	0.743198	0.919652	1.10027	0.922811	0.918749	0.922811	0.929532
8115196	zinc finger protein 300	ZNF300	0.784409	0.702384	1.04327	0.760946	0.863043	0.740821	0.817066	0.851564	1.00125
8027692	zinc finger protein 30	ZNF30	0.770624	0.763105	0.780739	0.82046	0.782805	0.704303	0.782805	0.786553	0.777429
8141380	zinc finger protein 3	ZNF3	1.88146	1.44308	1.4467	1.18727	1.46721	1.43266	1.27713	1.69819	1.44871
8070557	zinc finger protein 295	ZNF295	0.897855	0.866199	0.993754	0.955784	0.913951	0.879525	0.791335	0.888205	0.915035
8069711	zinc finger protein 294	ZNF294	0.836318	0.805866	0.730775	0.770743	0.72536	0.735015	0.735015	0.72003	0.735015
8120992	zinc finger protein 292	ZNF292	0.851564	0.763105	0.851564	0.790942	0.891721	0.871674	0.736792	0.851564	0.780445
8005106	zinc finger protein 29 pseudogene	ZNF29	0.851564	0.808031	0.81003	0.707739	0.936413	0.808904	0.808031	0.808031	0.634723
8013026	zinc finger protein 287	ZNF287	0.704645	0.703831	1.08326	0.94692	0.839709	0.856841	0.759693	0.808031	0.808031
8005117	zinc finger protein 286A /// TBC1 domain family, member 26 /// TBC1 domain family, member 28	ZNF286A /// TBC1D26 /// TBC1D28	1.30182	1.46979	1.29492	1.23608	1.15132	0.944441	0.789033	1.46313	1.31774
8005110	zinc finger protein 286A /// TBC1 domain family, member 26	ZNF286A /// TBC1D26	0.879876	1.10231	1.26328	1.01853	1.1609	0.970479	0.974838	1.00257	1.05611
8013305	zinc finger protein 286A	ZNF286A	0.668649	0.769313	1.22513	1.05228	1.11332	0.890715	0.819807	0.922875	0.962026
8029435	zinc finger protein 285B	ZNF285B	0.912941	0.814948	0.740399	0.937609	0.719701	0.867623	0.645084	0.883786	0.800793
8037459	zinc finger protein 285A	ZNF285A	1.1142	0.886478	0.847477	0.914653	0.772902	1.03159	0.719106	0.847477	0.846922
8029368	zinc finger protein 284	ZNF284	1.01355	0.737122	0.549094	0.682136	0.771905	0.71893	0.71893	0.705012	0.648211
8029321	zinc finger protein 283	ZNF283	0.854771	0.768196	0.690821	0.644022	0.783502	0.784417	0.790562	0.678243	0.768196
8137101	zinc finger protein 282	ZNF282	1.73646	1.6506	1.763	1.66194	1.46943	1.44439	1.59335	1.62186	1.69628
7923183	zinc finger protein 281	ZNF281	1.14965	1.21014	1.15234	1.11749	1.28202	0.987272	0.983453	1.32195	1.34783
7989159	zinc finger protein 280D	ZNF280D	0.853968	0.863697	0.864935	0.980499	0.753506	0.85994	0.874941	0.85994	0.856702
8175076	zinc finger protein 280C	ZNF280C	0.941765	0.923131	0.922803	0.922803	0.706221	0.812079	1.07208	1.09868	0.922803
8074845	zinc finger protein 280B	ZNF280B	0.900315	0.897136	0.900315	0.956242	1.01686	0.912962	0.948843	0.922803	0.810061
8074853	zinc finger protein 280A	ZNF280A	0.99452	0.880085	0.870092	1.10056	0.914998	0.935209	0.811038	0.87034	0.725741
8038993	zinc finger protein 28	ZNF28	0.655908	0.763105	0.632588	0.703885	0.763105	0.661034	0.723094	0.696846	0.775929
8135497	zinc finger protein 277	ZNF277	0.92371	0.824968	0.893417	0.912614	0.743129	0.659589	0.824968	0.809983	0.775296
8135512	zinc finger protein 277	ZNF277	0.668223	0.854968	1.0638	0.854968	0.841906	1.01048	0.969454	0.773824	0.841906
7998002	zinc finger protein 276	ZNF276	1.22704	1.32927	1.32088	1.06064	1.09658	1.2011	1.46	1.59766	1.29292
8170635	zinc finger protein 275	ZNF275	1.0233	1.08286	1.39074	1.04783	1.10016	1.01466	0.91169	1.01391	0.966498
8031871	zinc finger protein 274	ZNF274	1.15132	1.17803	0.904048	1.05681	1.17132	1.15132	0.998277	1.22052	1.40763
8133062	zinc finger protein 273	ZNF273	0.760538	0.768196	0.803696	0.806961	0.750969	0.887263	0.66207	0.745181	0.767641
8020898	zinc finger protein 271	ZNF271	0.998484	0.986966	0.831454	0.790942	1.17873	1.43172	0.915116	0.915116	0.783473
7960165	zinc finger protein 268 /// zinc finger, DHHC-type containing 11	ZNF268 /// ZDHHC11	1.27017	1.00257	1.16044	0.9305	1.00652	1.003	1.00742	1.09668	1.00652
7995258	zinc finger protein 267	ZNF267	0.825361	0.825361	0.685764	0.825361	0.999642	1.077	0.756789	0.851564	0.66105
8033754	zinc finger protein 266	ZNF266	1.16086	1.12072	0.922803	0.860005	0.878177	0.994598	1.03978	1.09925	1.17929
8031690	zinc finger protein 264	ZNF264	1.011	1.34246	1.11091	1.16175	0.90488	1.16175	1.03602	1.26963	1.34138
7992870	zinc finger protein 263	ZNF263	0.943942	1.0025	0.943942	1.01511	1.07438	0.701761	0.943942	0.972032	1.18561
8036324	zinc finger protein 260	ZNF260	0.822367	0.940791	0.753177	0.822367	0.889366	0.822367	0.884679	0.730638	0.822367
7960134	zinc finger protein 26	ZNF26	0.826579	0.941491	0.798401	0.74526	0.794268	1.00125	0.497599	0.80806	0.914545
7951838	zinc finger protein 259	ZNF259	1.96618	2.33901	1.57004	1.71049	1.74211	2.2282	2.14733	2.52322	3.43721
8027323	zinc finger protein 257	ZNF257	0.877963	0.80274	0.508649	0.940438	0.739944	0.899776	0.734416	0.695738	0.822562
8039706	zinc finger protein 256	ZNF256	0.719897	0.806011	0.994196	1.15867	0.809294	0.627773	0.924465	0.864407	1.01403
8027368	zinc finger protein 254	ZNF254	0.890852	0.798562	0.810125	0.890852	1.26124	0.890852	0.846169	1.03565	1.28966
8027241	zinc finger protein 253	ZNF253	1.16285	0.982292	1.29698	1.15225	1.09334	0.916284	0.92915	0.982292	1.15115
8153935	zinc finger protein 252	ZNF252	0.797572	0.89542	0.8432	0.796547	0.709474	0.856233	0.797572	0.797572	0.781471
8153890	zinc finger protein 251	ZNF251	0.943293	1.04576	0.903136	0.856358	0.943293	1.03866	0.775426	1.08966	0.943293
8153920	zinc finger protein 250	ZNF250	0.830338	1.04765	1.14409	1.03704	0.930421	1.13656	1.04765	1.05381	0.980467
7933105	zinc finger protein 25	ZNF25	0.842739	0.890715	0.721663	1.10916	0.890715	0.890715	0.9292	0.934249	1.21718
7933092	zinc finger protein 248	ZNF248	0.812747	0.895498	0.893054	0.940811	0.795551	0.91933	0.724408	0.817581	0.807459
8022882	zinc finger protein 24	ZNF24	1.00671	1.7982	1.10837	1.08243	0.816959	1.14515	0.860863	1.01087	1.05478
7933180	zinc finger protein 239	ZNF239	0.962085	0.882211	0.867001	1.0142	1.09752	1.01258	1.06274	1.22651	0.953774
7911038	zinc finger protein 238	ZNF238	0.795111	0.933465	1.05455	1.02923	1.02683	1.16001	1.0537	1.07167	0.760987
8021783	zinc finger protein 236	ZNF236	1.15433	1.13231	1.13231	1.04225	1.13231	1.29123	1.2464	1.13231	1.13231
8037444	zinc finger protein 235	ZNF235	0.848426	0.851558	0.824054	0.986712	0.999607	0.827771	0.912439	0.768088	1.0107
8029392	zinc finger protein 234	ZNF234	0.800204	0.846039	0.705279	0.763105	1.26724	0.864728	0.763105	0.846682	0.700688
8029423	zinc finger protein 233	ZNF233	1.12338	0.684839	0.762655	0.861647	0.715905	0.802726	0.788637	0.697346	0.877899
8011817	zinc finger protein 232	ZNF232	0.988783	0.878306	0.952467	1.17189	0.886041	0.956707	0.937003	1.0198	0.956707
8029347	zinc finger protein 230	ZNF230	0.643346	0.798401	0.799528	0.881057	0.807145	0.837553	0.950413	0.969215	0.78561
8002533	zinc finger protein 23 (KOX 16)	ZNF23	1.15132	1.15132	1.28831	1.08235	1.44347	1.15132	1.15132	0.998387	1.14813
8037467	zinc finger protein 229	ZNF229	0.867791	0.874643	0.790981	0.947105	0.77302	0.879735	0.945743	0.874643	0.874643
8037453	zinc finger protein 228	ZNF228	0.884366	0.708521	1.00707	0.780753	0.866104	0.725509	0.950187	0.724503	0.65238
8029413	zinc finger protein 227	ZNF227	1.01242	0.828065	1.22571	0.911027	0.896337	0.911027	0.935681	0.863877	0.911027
8029399	zinc finger protein 226	ZNF226	0.773193	0.943745	0.868504	1.13236	0.868504	0.868504	0.91343	0.968849	0.868504
8029385	zinc finger protein 225	ZNF225	0.921185	0.786483	0.817263	1.01068	0.852115	1.12922	0.819188	0.747441	0.613782
8029377	zinc finger protein 224	ZNF224	0.924562	0.841067	0.74141	0.687797	0.709483	0.681933	0.946164	0.810099	0.74141
8029360	zinc finger protein 223	ZNF223	1.2293	0.928179	0.913454	1.0589	0.922769	0.89901	0.899803	0.915423	0.829786
8029353	zinc finger protein 222	ZNF222	0.719987	0.8998	1.01436	1.16172	1.05966	0.796409	0.779818	0.652347	0.726968
8029331	zinc finger protein 221	ZNF221	0.765339	0.835802	0.699694	1.147	0.954562	0.709566	0.791429	0.7899	0.749669
7927202	zinc finger protein 22 (KOX 15)	ZNF22	0.974318	1.10876	1.01924	1.2201	0.888658	0.999633	0.947473	0.980261	0.982708
7977646	zinc finger protein 219	ZNF219	1.61964	1.58034	1.30504	1.16211	1.3077	1.36104	1.60332	1.25587	1.44698
8067113	zinc finger protein 217	ZNF217	0.943293	1.00696	0.982545	0.999869	1.00951	0.830476	1.09195	0.95021	1.21755
7938183	zinc finger protein 215	ZNF215	1.0845	0.828222	0.990562	0.95134	0.95134	1.10801	0.95134	0.967165	0.964163
7946288	zinc finger protein 214	ZNF214	0.735015	0.652053	0.781822	0.77696	0.763105	0.811477	0.78417	0.725712	0.685855
7992854	zinc finger protein 213	ZNF213	1.29808	1.37705	1.41773	1.7302	1.23246	1.19996	1.40503	1.37209	1.32677
8137112	zinc finger protein 212	ZNF212	1.62021	1.25313	1.15132	1.126	1.61295	1.19031	1.22052	1.22052	1.31576
8031784	zinc finger protein 211 /// zinc finger protein 134	ZNF211 /// ZNF134	0.972204	0.889337	0.91047	0.913356	0.982854	0.870339	1.07865	0.882784	0.974881
8031792	zinc finger protein 211	ZNF211	0.80725	1.31041	1.02781	1.08898	1.00539	1.01048	0.961854	0.826429	1.15495
8035819	zinc finger protein 208	ZNF208	0.705313	1.17734	0.481503	0.768918	0.617061	0.575658	0.975803	0.695802	0.781063
8006377	zinc finger protein 207	ZNF207	1.18915	1.319	1.26432	0.946753	1.67975	1.32354	1.53104	0.929938	1.24559
7992845	zinc finger protein 205	ZNF205	1.89942	1.90797	2.11468	1.77104	1.59966	1.98832	1.86294	1.89942	1.89942
8124498	zinc finger protein 204 (pseudogene)	ZNF204	0.520883	0.777404	0.828983	0.724912	0.708603	0.660349	0.7149	0.673467	0.66204
7952361	zinc finger protein 202	ZNF202	0.74791	0.803537	0.773037	0.850019	0.800902	0.856519	0.96515	0.886395	1.05997
7998931	zinc finger protein 200	ZNF200	0.964237	1.10157	0.901153	0.926272	1.024	0.937581	1.0248	1.20938	1.07418
8034344	zinc finger protein 20 /// zinc finger protein 625	ZNF20 /// ZNF625	1.23966	0.899686	0.81703	0.899686	0.939391	0.899686	0.872041	0.734052	0.899686
8034342	zinc finger protein 20 /// zinc finger protein 625	ZNF20 /// ZNF625	1.06971	0.839002	0.903146	1.06165	0.924913	0.836614	0.915116	0.899837	0.915116
8034334	zinc finger protein 20	ZNF20	0.782417	0.90912	0.814374	1.00244	0.837772	0.890715	0.788764	0.687864	1.09366
8043512	zinc finger protein 2	ZNF2	0.943293	0.943293	0.943293	0.878981	0.877034	0.999545	0.80982	0.999509	1.03182
8079204	zinc finger protein 197	ZNF197	0.878757	0.757585	0.850679	1.01765	0.945516	0.711771	0.842393	1.03871	0.974755
7945864	zinc finger protein 195	ZNF195	0.729831	1.08074	0.876252	0.926396	1.0875	0.897261	0.972684	0.736793	1.09721
8117655	zinc finger protein 193	ZNF193	1.01523	0.688375	0.974285	0.911027	0.911027	0.911027	0.793425	1.05694	0.995186
8117646	zinc finger protein 192	ZNF192	1.21653	1.10642	1.18855	1.05615	1.05828	1.25291	0.967967	1.1058	1.03685
8002547	zinc finger protein 19	ZNF19	0.912246	0.957166	1.07111	0.999869	1.02532	0.917617	1.14679	0.999869	1.03909
8156935	zinc finger protein 189	ZNF189	0.752602	0.803408	0.861867	0.817248	1.07395	0.766246	0.802218	0.835288	0.881478
8117667	zinc finger protein 187	ZNF187	0.928841	0.715202	0.8907	0.9298	0.810529	0.870282	0.902058	0.808865	0.903246
8170602	zinc finger protein 185 (LIM domain)	ZNF185	0.943293	0.943293	1.03175	0.948509	1.03175	0.943293	0.914093	0.943293	0.943293
8124502	zinc finger protein 184	ZNF184	0.931511	0.768196	0.694477	0.893354	0.817391	0.768196	0.655886	0.843474	0.768196
8172369	zinc finger protein 182 /// zinc finger protein 630	ZNF182 /// ZNF630	0.827385	0.892686	1.0497	0.907798	0.9863	0.832699	1.37578	1.14006	0.9863
8027685	zinc finger protein 181	ZNF181	1.04194	0.806094	0.693064	1.01801	0.838888	0.92459	0.933262	0.898822	0.841906
8037474	zinc finger protein 180	ZNF180	0.985705	0.963474	0.940906	0.954352	1.10849	0.732684	0.93077	0.864119	1.0459
8012843	zinc finger protein 18	ZNF18	0.988418	1.04572	1.11881	1.10809	1.05204	1.44065	1.29956	1.07119	1.21761
8005586	zinc finger protein 179	ZNF179	0.818019	0.734493	0.924758	0.976525	1.01867	1.00256	0.989625	0.913161	0.987877
8025488	zinc finger protein 177	ZNF177	0.960995	0.76209	0.922803	1.10443	0.967847	0.915015	0.922803	0.922803	0.691364
8030831	zinc finger protein 175	ZNF175	1.03149	0.915364	0.831454	0.831454	0.883092	0.604997	0.857474	0.729412	0.808709
7992897	zinc finger protein 174	ZNF174	0.9307	0.919181	0.923001	0.816299	0.865309	0.923	1.16652	0.766721	0.923
8031744	zinc finger protein 17	ZNF17	0.911461	0.743494	0.592143	0.717684	0.930421	0.752345	0.735015	0.735015	0.717684
8156529	zinc finger protein 169	ZNF169	1.1077	1.20477	0.859902	1.03974	0.803485	1.07006	0.954826	1.00659	1.04149
8079189	zinc finger protein 167	ZNF167	1.22277	1.10101	0.994421	0.960275	0.686571	0.957374	1.04546	0.96212	0.967663
8117630	zinc finger protein 165	ZNF165	0.923832	0.940478	0.902867	0.95778	0.833072	0.873408	1.08394	1.00849	0.830864
8039034	zinc finger protein 160	ZNF160	1.03171	0.839832	1.07834	1.02013	0.891975	1.00946	1.14226	1.04652	0.958491
8153930	zinc finger protein 16	ZNF16	0.880558	1.02439	0.956883	1.05979	0.933392	0.969331	0.956333	0.948693	0.964515
8167152	zinc finger protein 157	ZNF157	1.06601	1.23358	1.02782	1.10544	1.12252	1.04882	1.16236	1.12252	0.861519
8029340	zinc finger protein 155	ZNF155	0.92083	1.09451	0.92083	0.856518	0.960536	0.92083	1.00851	0.832003	0.856719
8039674	zinc finger protein 154	ZNF154	1.24387	1.22307	1.06481	1.11818	1.79375	1.22783	1.22307	1.12075	1.15442
8090237	zinc finger protein 148	ZNF148	0.856719	0.856719	0.836229	0.856719	1.18836	1.1	0.856719	0.809569	0.856719
8028186	zinc finger protein 146	ZNF146	0.833139	0.672921	0.925132	0.770818	0.742015	0.765651	0.749306	0.727679	0.832756
7938331	zinc finger protein 143	ZNF143	0.794024	0.941435	0.799444	0.799166	0.841767	0.705514	0.793612	0.7256	0.74496
8058973	zinc finger protein 142	ZNF142	1.22774	1.29667	1.59133	1.38666	1.24357	1.10082	1.54552	1.40248	1.5737
8093336	zinc finger protein 141	ZNF141	0.818877	0.911027	0.895927	0.911027	0.974429	1.01048	0.902177	0.763105	0.92584
7960150	zinc finger protein 140	ZNF140	0.87164	0.951177	1.13854	0.944102	0.87164	0.816529	0.87053	0.938826	0.797938
8035765	zinc finger protein 14	ZNF14	0.736327	0.853459	0.911873	1.20979	0.806098	1.04562	0.665006	0.687864	0.782712
8133057	zinc finger protein 138	ZNF138	1.10692	0.708864	0.828842	0.836872	0.902341	0.856261	0.855169	0.828452	0.885386
8030954	zinc finger protein 137	ZNF137	0.827297	0.784558	0.568682	0.756254	0.620991	0.645236	0.713995	0.771731	0.666611
8025998	zinc finger protein 136	ZNF136	0.899499	0.915104	0.967632	0.935066	0.942425	1.12092	0.947568	0.95321	0.850173
8031857	zinc finger protein 135	ZNF135	1.58346	1.51661	1.59207	1.82904	1.39247	1.75224	1.80705	1.55647	1.57305
8061154	zinc finger protein 133	ZNF133	1.44782	1.07265	1.24853	1.07302	1.23656	1.09648	1.31374	1.24853	1.24741
8039771	zinc finger protein 132	ZNF132	1.45914	1.12636	1.03144	0.912742	1.19592	1.02534	1.02738	1.01388	1.095
8105136	zinc finger protein 131	ZNF131	0.892834	0.899686	0.873606	0.899686	0.988145	0.932867	0.899686	0.899686	0.771303
7925691	zinc finger protein 124	ZNF124	0.904175	0.791686	1.05462	1.0329	0.911027	0.991359	0.941224	0.911027	0.90783
8033789	zinc finger protein 121	ZNF121	0.924554	0.904603	1.3239	0.974587	1.16656	0.904603	0.950579	0.904603	0.792418
8138116	zinc finger protein 12	ZNF12	1.15257	1.10002	1.15742	0.949866	1.05401	1.13025	1.05401	1.15932	1.09323
8139832	zinc finger protein 117	ZNF117	1.19092	0.862181	0.779316	0.856693	0.862181	0.862181	0.766349	0.882066	0.913983
8030002	zinc finger protein 114	ZNF114	0.624001	0.875067	0.866587	0.866587	0.985369	1.01048	0.689658	0.866587	0.910617
8133049	zinc finger protein 107	ZNF107	0.840368	0.79359	0.802824	0.786982	0.848	0.784355	0.93976	1.05106	0.749662
8027233	zinc finger protein 101	ZNF101	1.10132	1.07314	0.897313	0.906833	1.20772	1.08896	1.11807	0.851564	1.20772
8035808	zinc finger protein 100	ZNF100	1.04703	0.851942	0.656476	0.87785	0.954314	0.825528	1.45706	0.87785	0.890673
7960158	zinc finger protein 10	ZNF10	0.942508	0.880718	0.968948	0.7611	0.736082	0.748968	0.7473	0.792513	0.892144
8066786	zinc finger, MYND-type containing 8	ZMYND8	0.810917	0.819978	1.16326	1.33752	0.932049	0.892826	0.94961	0.994654	0.994654
8165622	zinc finger, MYND-type containing 19	ZMYND19	2.01162	2.31563	2.26325	2.31891	2.16772	2.82523	2.18901	2.47098	2.40211
7934384	zinc finger, MYND-type containing 17	ZMYND17	0.790306	0.928999	0.928999	1.19396	0.98494	1.06247	0.719596	0.928999	0.879991
8003926	zinc finger, MYND-type containing 15	ZMYND15	1.12978	1.06891	1.10708	1.57235	1.10319	1.08078	0.905848	1.22285	0.893494
7915425	zinc finger, MYND-type containing 12	ZMYND12	0.845047	0.887604	0.887604	0.944464	1.03085	0.848958	0.887604	0.990639	0.740507
7925792	zinc finger, MYND domain containing 11	ZMYND11	1.04904	1.14952	0.99396	1.00257	1.09096	1.00257	0.887914	1.12198	0.99771
8087653	zinc finger, MYND-type containing 10	ZMYND10	1.28425	1.36889	1.69038	1.46923	1.17421	1.40654	1.26092	1.55067	1.21221
7914764	zinc finger, MYM-type 6 /// Hypothetical protein LOC653160 /// similar to ZMYM6 protein	ZMYM6 /// LOC653160 /// LOC100130633	1.08898	1.08898	1.08898	1.05785	1.52592	1.01048	1.17666	1.08898	1.08898
7970428	zinc finger, MYM-type 5	ZMYM5	0.936346	0.998111	0.656591	0.816283	0.77179	0.647576	0.976615	0.693347	0.624698
7899957	zinc finger, MYM-type 4	ZMYM4	0.914016	1.09887	0.764755	1.14925	0.908821	0.938047	0.843444	0.830077	0.860614
8173457	zinc finger, MYM-type 3	ZMYM3	1.41251	1.40583	1.3924	1.02041	1.3924	1.49402	1.33056	1.3924	1.45446
7967900	zinc finger, MYM-type 2	ZMYM2	0.788012	0.851564	1.03036	0.87431	0.851564	0.890715	1.00358	0.851564	0.851564
7899943	zinc finger, MYM-type 1	ZMYM1	0.758162	0.743494	0.726535	0.786846	0.735015	0.623962	0.735015	1.01425	0.735015
7900413	zinc metallopeptidase (STE24 homolog, S. cerevisiae)	ZMPSTE24	0.728764	0.557347	0.744742	0.801069	1.1119	0.744742	0.612169	0.744742	0.72815
8132617	zinc finger, MIZ-type containing 2	ZMIZ2	3.00223	2.93228	2.2634	2.44728	2.45485	2.25112	2.75124	2.75866	2.88898
7928558	zinc finger, MIZ-type containing 1	ZMIZ1	1.62947	1.63315	1.51242	1.45015	1.41733	1.28768	1.43141	1.63887	1.8916
8075276	zinc finger, matrin type 5	ZMAT5	1.32734	1.26488	1.47058	1.68346	1.32734	1.32734	1.17096	1.32734	1.32734
8150419	zinc finger, matrin type 4	ZMAT4	1.14208	1.25417	1.2955	1.35125	0.999223	0.923052	1.15339	1.14266	0.986266
8092230	zinc finger, matrin type 3	ZMAT3	1.36647	1.53288	1.3307	1.24469	0.910659	1.1213	1.23984	1.22276	1.60302
8108620	zinc finger, matrin type 2	ZMAT2	1.61272	1.08248	1.16302	0.907311	1.04757	1.01949	1.15948	1.20739	1.19973
8174119	zinc finger, matrin type 1	ZMAT1	0.862297	0.806877	0.901725	0.818763	0.950256	0.934907	0.818763	0.880859	0.645455
8134621	zinc finger with KRAB and SCAN domains 5	ZKSCAN5	1.20999	1.04994	1.01048	1.13417	0.98172	1.02631	1.01048	0.99409	1.07533
8124553	zinc finger with KRAB and SCAN domains 4	ZKSCAN4	1.01473	1.00968	1.53413	1.05791	1.13193	1.54448	1.07688	0.922803	0.959164
8117685	zinc finger with KRAB and SCAN domains 3	ZKSCAN3	1.11012	0.860495	0.827376	1.0305	1.13506	0.951999	0.820356	1.05637	0.951999
8000399	zinc finger with KRAB and SCAN domains 2	ZKSCAN2	1.00657	1.30109	1.08656	1.12391	0.92931	1.00642	1.22377	1.16698	0.841402
8134680	zinc finger with KRAB and SCAN domains 1	ZKSCAN1	1.00212	1.45365	1.05747	1.05747	0.886657	1.14328	1.14515	0.964278	1.1492
8039625	zinc finger, imprinted 3	ZIM3	0.852674	0.815683	0.943293	1.00098	0.992301	1.00761	0.948285	0.959119	0.940097
8039607	zinc finger, imprinted 2 /// paternally expressed 3	ZIM2 /// PEG3	1.26449	1.0155	1.16302	1.2121	1.25193	1.33588	1.27471	1.19599	1.08388
8031768	zinc finger protein interacting with K protein 1 homolog (mouse)	ZIK1	0.898759	0.865943	0.791736	0.784911	0.834383	0.881058	0.865379	1.09153	0.908463
7972567	Zic family member 5 (odd-paired homolog, Drosophila)	ZIC5	2.24684	1.87793	1.89979	1.88732	1.89185	2.10391	1.74711	1.89185	1.89185
8091342	Zic family member 4	ZIC4	1.02486	1.15904	1.01985	1.13453	1.08701	1.33456	1.08701	1.22052	1.08701
8170200	Zic family member 3 heterotaxy 1 (odd-paired homolog, Drosophila)	ZIC3	1.02323	0.866587	0.915937	1.00931	0.851564	1.01551	0.936427	1.00274	0.864437
7969830	Zic family member 2 (odd-paired homolog, Drosophila)	ZIC2	3.66854	3.60042	3.60405	3.58902	3.63252	3.4596	3.82292	3.66326	3.64045
8083233	Zic family member 1 (odd-paired homolog, Drosophila)	ZIC1	1.09421	1.02281	1.04998	1.05671	1.032	1.04998	1.15001	1.10672	1.0835
8066279	zinc fingers and homeoboxes 3	ZHX3	0.956897	0.914774	0.8176	0.899208	0.976772	0.782759	0.860581	0.766241	0.952587
8148149	zinc fingers and homeoboxes 2	ZHX2	1.1986	0.933395	1.16864	1.04278	0.972405	1.03178	0.951358	1.12247	1.02405
8064156	zinc finger, CCCH-type with G patch domain	ZGPAT	1.63048	2.27678	2.08272	2.08432	2.08272	1.97778	1.83271	2.14839	2.363
8003578	zymogen granule protein 16	ZG16	1.67356	1.33105	1.37504	1.56977	1.20019	1.45257	1.3712	1.45155	1.25153
7994615	zymogen granule protein 16	ZG16	1.34069	1.13236	1.2036	1.35546	1.03847	1.13236	1.32677	1.13236	1.06517
7901426	zinc finger, FYVE domain containing 9	ZFYVE9	0.851564	0.792878	0.768196	0.871274	0.86982	0.923897	0.866814	0.768196	0.768196
8099008	zinc finger, FYVE domain containing 28	ZFYVE28	0.964881	0.971733	1.41527	1.71226	1.11507	1.05136	1.1247	1.07015	0.994716
7929692	zinc finger, FYVE domain containing 27	ZFYVE27	1.10881	1.10881	1.01012	1.13236	1.05758	1.10881	1.24226	1.54959	1.03848
7979757	zinc finger, FYVE domain containing 26	ZFYVE26	1.35966	1.00743	1.04443	1.15132	1.15132	1.04739	1.15132	1.26788	1.15132
7977149	zinc finger, FYVE domain containing 21	ZFYVE21	2.23074	1.87513	1.90512	1.71076	1.87513	2.0416	2.1249	1.69957	2.10255
8085537	zinc finger, FYVE domain containing 20	ZFYVE20	1.01078	1.13367	0.701	0.980695	0.996791	1.2741	0.899832	1.2321	0.950589
7982812	zinc finger, FYVE domain containing 19	ZFYVE19	1.5175	1.36083	1.92113	1.5621	1.35232	1.34121	1.46286	1.61261	1.45975
8106602	zinc finger, FYVE domain containing 16	ZFYVE16	0.947678	0.710886	0.726535	0.795326	0.794313	0.786356	0.735015	0.665159	0.790369
7979984	zinc finger, FYVE domain containing 1	ZFYVE1	1.26031	1.3924	1.59039	1.39031	1.32038	1.61369	1.40189	1.30038	1.32038
8176384	zinc finger protein, Y-linked /// hypothetical protein LOC100130829	ZFY /// LOC100130829	0.966923	1.00001	0.886916	1.04782	0.984462	1.12274	1.07035	0.955074	0.991514
8166500	zinc finger protein, X-linked	ZFX	0.728015	0.788903	0.804947	0.699945	0.913188	0.602462	0.795202	0.840377	0.955945
8032699	zinc finger RNA binding protein 2	ZFR2	1.58957	1.5616	1.55752	1.8316	1.62717	1.64429	1.88374	1.70832	1.62717
8111360	zinc finger RNA binding protein	ZFR	1.0599	1.21646	1.2294	1.01048	1.04122	0.958647	1.01048	1.33131	1.01048
8147837	zinc finger protein, multitype 2	ZFPM2	0.793236	0.866587	1.04532	0.890715	0.814697	0.890715	0.845671	0.851564	0.890715
7997767	zinc finger protein, multitype 1	ZFPM1	2.93577	2.65269	2.74349	2.59347	2.74349	2.25001	2.82809	3.01416	2.5505
7941127	zinc finger protein-like 1	ZFPL1	2.25064	2.20075	2.21457	1.97323	2.00248	2.22978	2.50204	2.06586	2.5078
8170644	zinc finger protein 92 homolog (mouse)	ZFP92	1.10543	0.87623	1.15132	1.75618	1.09255	0.890608	1.04355	1.24548	0.87918
7940118	zinc finger protein 91 homolog (mouse) /// ZFP91-CNTF /// ciliary neurotrophic factor	ZFP91 /// ZFP91-CNTF /// CNTF	1.03665	0.907739	0.915116	0.915116	0.915116	0.915116	0.985115	0.825163	0.91399
7996807	zinc finger protein 90 homolog (mouse)	ZFP90	0.9175	0.971414	0.914113	0.951207	0.926458	0.892901	1.08978	0.84616	0.92627
8067094	zinc finger protein 64 homolog (mouse)	ZFP64	1.04852	1.16803	1.23595	1.08706	1.22747	1.02796	1.16792	1.52364	1.15094
8116494	zinc finger protein 62 homolog (mouse)	ZFP62	0.952401	0.922208	1.21677	1.02163	0.78786	0.782131	0.968372	1.04822	0.928537
8124684	zinc finger protein 57 homolog (mouse)	ZFP57	0.876773	1.09446	1.01671	0.917529	0.917529	1.00576	0.735905	0.917529	0.700688
8098690	zinc finger protein 42 homolog (mouse)	ZFP42	0.953671	0.899686	0.756814	1.06576	0.899686	0.899686	0.747634	0.761438	0.964541
8148597	zinc finger protein 41 homolog (mouse)	ZFP41	1.30602	1.36458	1.27284	1.36091	1.34524	1.30602	1.30602	1.18585	1.36596
8163444	zinc finger protein 37 homolog (mouse)	ZFP37	0.943293	0.746543	0.758479	0.823918	0.712212	0.746543	0.924426	0.746543	0.717626
8051814	zinc finger protein 36, C3H type-like 2	ZFP36L2	4.05561	3.85626	3.16923	1.99082	1.91388	1.79657	2.05344	2.05535	1.99082
7979813	zinc finger protein 36, C3H type-like 1	ZFP36L1	4.3269	4.40421	3.89636	2.37974	2.27252	2.46529	2.45255	2.6465	3.3324
8028652	zinc finger protein 36, C3H type, homolog (mouse)	ZFP36	5.49808	5.55394	4.84667	4.88996	4.66017	4.63716	5.90264	5.80577	6.12349
8036420	zinc finger protein 30 homolog (mouse)	ZFP30	0.890715	0.779663	0.969822	0.946643	0.890715	0.890715	0.915116	0.590955	0.807348
8004081	zinc finger protein 3 homolog (mouse)	ZFP3	0.886617	0.866587	0.794788	1.08915	0.836885	0.791427	0.774514	0.847136	0.904393
8031659	zinc finger protein 28 homolog (mouse)	ZFP28	1.19727	0.882934	1.00087	1.23409	0.921144	1.22431	0.914768	0.996925	1.11428
8110472	zinc finger protein 2 homolog (mouse)	ZFP2	0.883027	0.81756	0.989229	0.89616	1.03865	0.908889	0.937267	0.721903	0.941308
8022110	zinc finger protein 161 homolog (mouse)	ZFP161	0.756253	0.866587	1.0497	0.855609	0.600829	0.882413	0.803599	0.856719	0.950333
8036304	zinc finger protein 14 homolog (mouse)	ZFP14	0.79332	0.739391	0.706097	0.800731	0.819832	0.78814	0.962202	0.863182	0.700685
7987892	zinc finger protein 106 homolog (mouse)	ZFP106	0.807217	0.843032	0.927437	0.875799	0.841906	0.941358	0.841906	0.905128	0.841906
7997257	zinc finger protein 1 homolog (mouse)	ZFP1	0.727106	0.897255	0.764866	0.726692	1.03009	0.884375	0.89976	1.02584	0.795169
8147000	zinc finger homeobox 4	ZFHX4	0.922803	0.922803	0.922803	0.794421	1.11745	1.43515	0.971332	0.922803	0.922803
8002692	zinc finger homeobox 3	ZFHX3	1.43663	1.26185	1.29698	1.36944	1.16476	1.45405	1.22782	1.27359	1.20976
7978056	zinc finger homeobox 2	ZFHX2	1.02515	1.33435	1.26008	1.39526	1.23018	1.23725	1.13426	1.23018	1.0396
8153043	zinc finger and AT hook domain containing	ZFAT	0.878734	0.807716	0.893427	0.846028	0.883729	0.960624	0.800324	0.809815	0.890803
7985259	zinc finger, AN1-type domain 6	ZFAND6	1.16281	1.23836	0.635313	0.833087	0.808684	1.1089	0.715684	0.897144	1.21391
8161747	zinc finger, AN1-type domain 5	ZFAND5	1.9601	1.94912	1.20448	1.53241	1.53241	1.53128	2.3325	1.44245	2.15341
8119227	zinc finger, AN1-type domain 3	ZFAND3	2.05492	2.33945	1.73696	1.71032	1.73696	1.50247	1.40732	1.87839	2.49903
8048478	zinc finger, AN1-type domain 2B	ZFAND2B	2.54192	2.09919	1.98477	1.90047	1.9406	1.90078	2.03292	1.90083	1.99305
8137709	zinc finger, AN1-type domain 2A	ZFAND2A	1.17421	1.67484	1.07912	1.22012	1.28826	1.23309	1.42741	1.23498	1.33373
8151561	zinc finger, AN1-type domain 1	ZFAND1	0.57708	0.704738	0.704734	0.74662	0.916123	0.712651	0.666466	0.697393	0.704738
8164464	zer-1 homolog (C. elegans)	ZER1	1.17609	1.212	1.17609	1.27398	1.18363	1.11449	0.977945	1.19785	1.32537
8055624	zinc finger E-box binding homeobox 2	ZEB2	1.05861	1.00156	1.05974	1.32035	0.948878	1.33141	0.972278	1.04061	1.10351
7926916	zinc finger E-box binding homeobox 1	ZEB1	0.738193	0.872291	0.942856	0.867959	0.868951	0.967774	0.967632	0.859449	0.784381
8175023	zinc finger, DHHC-type containing 9	ZDHHC9	1.61603	1.47634	1.25367	1.15349	1.53418	1.35542	1.61787	1.64867	1.54149
8074892	zinc finger, DHHC-type containing 8 pseudogene	ZDHHC8P	2.49952	2.3418	2.49952	2.7186	2.5001	2.48903	2.5254	2.7958	2.49754
8071339	zinc finger, DHHC-type containing 8	ZDHHC8	2.32501	2.04872	2.35097	2.14754	2.28578	2.27676	2.48105	2.21454	2.17204
8003180	zinc finger, DHHC-type containing 7	ZDHHC7	1.83843	1.66329	1.75833	1.23358	1.8041	1.72101	2.03025	1.83843	2.19276
7936346	zinc finger, DHHC-type containing 6	ZDHHC6	1.08145	1.04922	1.01318	1.08175	1.05248	1.13271	1.27677	1.30352	1.41931
7940051	zinc finger, DHHC-type containing 5	ZDHHC5	1.29589	1.20908	1.45116	1.38037	1.41332	1.38212	1.3948	1.43333	1.62397
8131414	zinc finger, DHHC-type containing 4	ZDHHC4	2.80654	2.02769	2.36784	2.20858	2.14056	2.0973	2.30633	2.21788	2.79177
8086505	zinc finger, DHHC-type containing 3	ZDHHC3	1.15568	1.00368	1.29474	0.896764	1.0587	1.34026	1.17366	1.47745	1.0497
7949645	zinc finger, DHHC-type containing 24	ZDHHC24	1.24066	1.65662	1.32074	1.43903	1.50204	1.30553	1.39875	1.50547	1.72471
8081779	zinc finger, DHHC-type containing 23	ZDHHC23	0.936705	1.17332	1.08638	1.08638	1.06943	1.12553	1.02042	1.1267	1.08638
7980344	zinc finger, DHHC-type containing 22	ZDHHC22	1.01494	1.21774	1.22124	1.37214	1.19781	1.35909	1.18562	1.38117	1.17046
8160151	zinc finger, DHHC-type containing 21	ZDHHC21	1.07405	0.757844	0.762082	0.790942	0.896275	0.811464	0.888601	0.748149	0.71244
7970524	zinc finger, DHHC-type containing 20	ZDHHC20	0.9683	0.719882	0.630995	0.774993	0.747414	0.836026	0.685023	0.755693	0.774993
8144758	zinc finger, DHHC-type containing 2	ZDHHC2	1.21108	1.03846	1.35697	1.23836	1.09905	1.04918	0.908546	0.879919	0.843733
8093074	zinc finger, DHHC-type containing 19	ZDHHC19	1.13938	1.15132	1.15132	1.23822	1.11632	1.09629	1.19116	1.15132	1.15132
7899253	zinc finger, DHHC-type containing 18	ZDHHC18	3.00931	3.22147	3.20987	2.94254	2.7855	3.06338	2.94354	2.93496	3.73663
7957277	zinc finger, DHHC-type containing 17	ZDHHC17	0.898715	0.679604	0.779183	1.05804	0.805523	0.898715	0.737736	0.851564	0.913994
7929634	zinc finger, DHHC-type containing 16	ZDHHC16	2.0644	2.001	1.60459	1.37529	1.48255	1.61077	1.32246	1.42051	1.68676
8173647	zinc finger, DHHC-type containing 15	ZDHHC15	0.835132	0.782698	0.84751	0.829479	0.881532	0.905042	0.871674	0.934697	0.829479
8122982	zinc finger, DHHC-type containing 14	ZDHHC14	1.01225	0.533292	1.14113	0.647531	1.14092	1.43941	0.967176	0.966174	0.99152
7938816	zinc finger, DHHC-type containing 13	ZDHHC13	0.939038	1.04727	0.898739	0.760718	0.692113	0.971672	0.898739	0.898739	1.00013
8164452	zinc finger, DHHC-type containing 12	ZDHHC12	3.80378	4.57798	3.8396	3.37338	3.52833	3.74439	4.16115	4.11568	4.60892
8110721	zinc finger, DHHC-type containing 11	ZDHHC11	0.935348	1.11184	1.10983	1.38102	1.30699	0.951501	1.04754	1.11279	1.11665
8002029	zinc finger, DHHC-type containing 1	ZDHHC1	1.19877	1.02941	1.11076	1.32964	1.37101	1.52144	1.10788	1.21984	1.41876
8047784	zinc finger, DBF-type containing 2	ZDBF2	0.718641	0.926549	0.673149	0.721121	0.545672	1.04614	0.823017	0.517098	0.818885
8078319	zinc finger, CW type with PWWP domain 2	ZCWPW2	0.737157	0.720122	0.6317	0.91466	0.898218	0.800715	0.720122	0.754335	0.720122
8141498	zinc finger, CW type with PWWP domain 1	ZCWPW1	0.778604	0.791565	1.20124	0.908783	0.808173	1.0489	0.814686	0.740686	0.884618
7962367	zinc finger CCHC-type and RNA binding motif 1	ZCRB1	0.69133	0.535128	0.850936	1.05946	0.822929	0.889383	1.0877	0.701149	0.955013
8106702	zinc finger, CCHC domain containing 9	ZCCHC9	1.03727	0.782179	0.972032	0.999869	1.17154	0.886223	0.780194	0.987858	1.13236
7967287	zinc finger, CCHC domain containing 8	ZCCHC8	0.939076	0.770603	0.633528	0.705101	0.662162	0.852995	0.833107	0.757049	0.758923
8155234	zinc finger, CCHC domain containing 7	ZCCHC7	0.862943	1.02644	0.969058	1.24458	0.903734	0.9882	1.16854	0.750907	0.83309
8162147	zinc finger, CCHC domain containing 6	ZCCHC6	0.88568	0.820901	0.825361	0.725069	0.825361	0.94788	0.808031	0.825361	0.791034
8173752	zinc finger, CCHC domain containing 5	ZCCHC5	0.703108	1.00409	0.838195	0.838195	0.803192	0.872191	0.838195	0.909434	0.838195
8094393	zinc finger, CCHC domain containing 4	ZCCHC4	0.802183	0.808595	0.831222	0.726339	0.722232	0.907576	0.936097	0.815867	0.811141
8060330	zinc finger, CCHC domain containing 3	ZCCHC3	2.42577	1.91836	1.41595	1.60398	1.71654	1.63608	2.38078	1.96392	2.49759
8021546	zinc finger, CCHC domain containing 2 /// chromosome 18 open reading frame 49	ZCCHC2 /// C18orf49	1.04667	0.758909	0.803096	0.989318	0.923138	0.749404	0.915486	0.915486	0.934615
8021542	zinc finger, CCHC domain containing 2	ZCCHC2	3.38388	3.21773	3.08511	3.50655	3.33828	2.99056	3.05386	3.83726	3.26252
7899604	zinc finger, CCHC domain containing 17	ZCCHC17	0.939179	0.994654	0.994654	0.994654	0.920517	0.890715	1.14253	0.994654	0.994654
8169432	zinc finger, CCHC domain containing 16	ZCCHC16	0.891216	1.12109	0.96324	1.17885	0.800349	0.96324	1.11016	0.843073	0.812073
8003263	zinc finger, CCHC domain containing 14	ZCCHC14	0.992	1.10261	1.0497	1.07425	1.0571	0.792488	0.903172	0.76139	0.992
8168420	zinc finger, CCHC domain containing 13	ZCCHC13	1.1981	1.11461	1.36839	1.1981	1.1981	1.05559	1.1981	1.24314	1.1981
8169598	zinc finger, CCHC domain containing 12	ZCCHC12	0.848921	0.634104	0.846629	0.912391	0.781744	0.830605	0.868847	0.850438	0.810582
7916185	zinc finger, CCHC domain containing 11	ZCCHC11	1.07406	0.929072	0.831454	0.800324	0.78017	0.737729	0.831454	0.819285	0.831454
8114113	zinc finger, CCHC domain containing 10	ZCCHC10	0.735497	0.924158	0.841906	0.822938	0.969178	0.797297	1.22299	0.933255	0.840779
8142899	zinc finger, C3HC-type containing 1	ZC3HC1	1.79428	1.23358	1.1562	1.1338	1.24431	1.2494	1.22059	1.21776	1.52096
8143270	zinc finger CCCH-type, antiviral 1-like	ZC3HAV1L	0.833681	0.857446	0.873263	0.857446	0.857446	0.857446	0.7678	0.857446	0.945969
8143279	zinc finger CCCH-type, antiviral 1	ZC3HAV1	1.23067	1.02727	1.0806	1.00455	1.26654	1.02727	1.0444	1.02364	1.02727
8054664	zinc finger CCCH-type containing 8	ZC3H8	0.724529	0.81001	0.964909	0.879068	1.07315	0.768196	0.829547	0.625372	0.768196
8073397	zinc finger CCCH-type containing 7B	ZC3H7B	2.55898	2.9523	2.55898	2.23856	2.36403	2.3439	3.08696	2.55568	3.01123
7999496	zinc finger CCCH-type containing 7A	ZC3H7A	0.804835	1.06213	0.831454	0.771953	1.32042	0.847709	0.913607	0.687864	0.896344
8044450	zinc finger CCCH-type containing 6	ZC3H6	0.969244	1.08743	0.999173	1.13306	1.07511	0.836026	0.974571	0.963552	0.974571
8037856	zinc finger CCCH-type containing 4	ZC3H4	1.42324	1.42324	1.52965	1.13055	1.42324	1.19768	1.42324	1.42324	1.55851
8153411	zinc finger CCCH-type containing 3	ZC3H3	1.36789	1.35663	1.25464	1.36789	1.37018	1.21879	1.34951	1.29604	1.36789
7997779	zinc finger CCCH-type containing 18	ZC3H18	1.73877	1.74759	1.82573	1.97305	2.17467	1.5558	1.69443	1.83666	1.57145
8046848	zinc finger CCCH-type containing 15	ZC3H15	0.868124	0.649728	0.740948	1.06343	0.808722	0.840475	0.808722	0.807449	0.811268
7976101	zinc finger CCCH-type containing 14	ZC3H14	0.866587	0.866587	0.844566	0.866587	0.805314	0.792878	0.866587	0.743306	0.866587
7971422	zinc finger CCCH-type containing 13	ZC3H13	0.885267	0.70798	1.07744	0.813281	0.953167	0.804089	0.740806	0.619443	0.790942
8130073	zinc finger CCCH-type containing 12D	ZC3H12D	1.87776	2.00021	2.47905	1.95717	2.03338	2.00021	1.9405	1.89058	2.13621
7943715	zinc finger CCCH-type containing 12C	ZC3H12C	0.756019	0.708768	0.755644	0.698088	0.675267	0.851677	0.915116	0.737468	0.751536
8167957	zinc finger CCCH-type containing 12B	ZC3H12B	0.851306	0.993312	0.788536	0.784245	0.832215	0.866924	0.817127	0.755291	0.77
7900146	zinc finger CCCH-type containing 12A	ZC3H12A	3.30062	3.18482	2.8356	3.17607	2.90698	3.28929	3.41148	3.32856	3.9741
7908978	zinc finger CCCH-type containing 11A	ZC3H11A	0.943293	0.625168	0.915116	0.916087	0.900426	0.982979	0.76699	0.867966	1.21561
7956162	zinc finger CCCH-type containing 10	ZC3H10	1.39795	1.15569	1.28827	1.24505	1.57423	0.88123	1.53245	1.49285	1.25068
8118721	zinc finger and BTB domain containing 9 /// synaptic Ras GTPase activating protein 1 homolog (rat)	ZBTB9 /// SYNGAP1	0.888966	1.04027	1.3231	1.13236	1.15132	1.04719	1.50036	1.4862	1.15642
7914550	zinc finger and BTB domain containing 8 opposite strand	ZBTB8OS	0.869985	0.714808	1.44971	1.66032	1.16607	0.777972	1.15326	1.40928	0.777667
7899797	zinc finger and BTB domain containing 8 /// zinc finger and BTB domain containing 8-like	ZBTB8 /// RP1-27O5.1	1.01438	1.07164	0.972222	1.1198	1.01438	1.15994	0.9836	0.989901	1.01438
8023212	zinc finger and BTB domain containing 7C	ZBTB7C	1.05065	1.1241	1.36943	1.24186	1.19374	1.10681	1.19492	1.26498	1.19374
7905854	zinc finger and BTB domain containing 7B	ZBTB7B	3.42212	3.70629	3.44729	2.82744	2.96089	3.2471	3.1298	3.12984	3.27408
8032755	zinc finger and BTB domain containing 7A	ZBTB7A	2.73671	2.79967	2.87573	2.87573	2.87573	2.8365	2.97988	3.1782	2.87573
8163999	zinc finger and BTB domain containing 6	ZBTB6	1.05104	0.967979	0.950439	0.992988	0.922967	1.10768	0.97515	0.990442	0.944959
8161224	zinc finger and BTB domain containing 5	ZBTB5	1.10371	1.10902	1.17988	1.12344	0.813418	1.37122	1.26839	1.02786	1.05435
7897305	zinc finger and BTB domain containing 48	ZBTB48	1.42467	1.3924	1.52699	1.43098	1.3924	1.37238	1.3924	1.32055	1.28825
8079099	zinc finger and BTB domain containing 47	ZBTB47	2.03681	1.97175	2.00807	1.83299	2.14361	1.74944	2.01091	1.98552	2.10008
8067743	zinc finger and BTB domain containing 46	ZBTB46	1.64849	1.55785	1.64299	1.61993	1.64299	1.54541	1.8937	1.52294	1.64849
8039791	zinc finger and BTB domain containing 45	ZBTB45	1.53428	1.51715	1.2125	1.81791	1.54232	1.38283	1.53428	1.43644	1.38532
7952739	zinc finger and BTB domain containing 44	ZBTB44	0.942754	1.25517	1.06368	1.04146	0.965453	1.28721	1.09767	1.37703	1.03853
8157933	zinc finger and BTB domain containing 43	ZBTB43	1.07174	0.97128	1.0497	1.01937	1.0497	1.05272	0.842898	0.922803	1.06489
7923119	zinc finger and BTB domain containing 41	ZBTB41	0.683609	0.857902	0.735015	0.912328	0.895459	0.768528	0.77008	0.596447	0.855118
7898750	zinc finger and BTB domain containing 40	ZBTB40	1.07512	1.44945	1.10991	1.07166	1.10358	1.0893	1.35545	1.14343	1.10292
8012212	zinc finger and BTB domain containing 4	ZBTB4	1.3924	1.43092	1.39683	1.3924	1.45231	1.33239	1.4313	1.41677	1.61026
7964300	zinc finger and BTB domain containing 39	ZBTB39	1.32373	1.22983	1.23751	1.02647	1.24513	1.15132	1.22983	1.28186	1.0676
8083092	zinc finger and BTB domain containing 38	ZBTB38	0.881468	0.957044	0.861433	0.864376	0.779456	0.680106	0.992974	0.934535	0.818289
8083090	zinc finger and BTB domain containing 38	ZBTB38	1.13761	1.31129	1.0497	0.899686	1.14501	1.25773	0.876945	1.01951	1.25926
7907486	zinc finger and BTB domain containing 37	ZBTB37	0.827603	0.915582	1.17544	0.970692	0.970692	1.21807	0.920557	0.970692	0.903184
8157945	zinc finger and BTB domain containing 34	ZBTB34	1.75865	1.733	2.19465	1.57814	1.07488	1.43182	1.76272	1.57988	2.1142
8157941	zinc finger and BTB domain containing 34	ZBTB34	1.308	1.20757	1.308	1.3588	1.25121	1.25858	1.308	1.32038	1.48205
8157947	zinc finger and BTB domain containing 34	ZBTB34	1.07234	0.863059	1.01995	1.31104	1.0663	1.11674	1.00027	1.07576	1.07576
8169683	zinc finger and BTB domain containing 33	ZBTB33	0.995226	0.780435	0.790956	0.814937	0.763105	0.763105	1.02617	0.763105	0.763105
8027947	zinc finger and BTB domain containing 32	ZBTB32	1.31722	1.32709	1.77031	1.30351	1.13154	1.15241	1.30686	1.44328	1.33361
7948829	zinc finger and BTB domain containing 3	ZBTB3	1.21659	1.12301	1.41973	1.3376	0.901149	0.936605	1.14458	1.33762	1.26103
8164002	zinc finger and BTB domain containing 26	ZBTB26	0.909453	0.930357	0.98646	0.94907	1.06285	1.00257	1.03456	0.909453	0.842548
7979611	zinc finger and BTB domain containing 25	ZBTB25	1.32592	1.17734	1.53968	1.64096	1.32847	1.28703	1.80652	1.45003	1.34886
8128767	zinc finger and BTB domain containing 24	ZBTB24	0.706899	0.805494	1.00566	0.857321	0.937338	0.708102	0.719927	0.775844	0.674116
8178988	zinc finger and BTB domain containing 22	ZBTB22	2.08197	2.24831	2.00886	2.06936	2.12443	2.13964	2.03193	2.06696	2.06696
8125731	zinc finger and BTB domain containing 22	ZBTB22	2.61447	2.5714	2.37175	2.44496	2.48823	2.52122	2.44496	2.44496	2.44496
8089701	zinc finger and BTB domain containing 20	ZBTB20	0.891496	0.853046	1.16949	0.881413	0.930421	1.36857	0.753376	0.930421	0.930421
8130185	zinc finger and BTB domain containing 2	ZBTB2	0.996379	0.848104	0.945658	0.95081	1.0497	0.908856	0.681055	1.04764	0.898185
7912675	zinc finger and BTB domain containing 17	ZBTB17	1.48684	1.5382	1.35804	1.73694	1.83843	1.52402	1.57115	1.50484	1.76019
7943984	zinc finger and BTB domain containing 16	ZBTB16	1.20016	1.22567	1.45279	1.37221	1.32038	1.32038	1.42262	1.20985	1.32038
8125201	zinc finger and BTB domain containing 12	ZBTB12	2.70578	2.67972	2.81197	2.84162	2.77297	2.75236	2.85581	2.73767	2.66655
8178683	zinc finger and BTB domain containing 12	ZBTB12	2.70578	2.67972	2.81197	2.84162	2.77297	2.75236	2.85581	2.73767	2.66655
8089234	zinc finger and BTB domain containing 11	ZBTB11	1.19004	0.882632	0.982052	0.982052	1.14687	0.8947	0.905468	1.07107	0.98051
8147040	zinc finger and BTB domain containing 10	ZBTB10	1.04441	1.11697	1.11071	0.947967	1.24429	1.17133	1.11523	1.13814	1.13814
7975068	zinc finger and BTB domain containing 1	ZBTB1	0.823208	0.753401	0.802718	0.84462	0.654994	0.863626	0.940219	0.775662	0.736634
8067221	Z-DNA binding protein 1	ZBP1	1.32485	1.02535	1.18202	1.33032	1.02286	1.22117	1.04851	1.18202	0.980941
7946635	zinc finger, BED-type containing 5	ZBED5	0.837336	0.862187	0.736593	0.843289	0.794279	0.807472	0.812846	0.920354	0.808031
8073943	zinc finger, BED-type containing 4	ZBED4	1.07414	1.10736	0.948621	0.999869	1.26204	1.03073	1.10366	1.6894	1.64003
8112740	zinc finger, BED-type containing 3	ZBED3	2.94697	3.44754	3.15164	3.03386	2.85155	2.74675	2.94697	2.77713	3.13267
8089467	zinc finger, BED-type containing 2	ZBED2	1.03152	0.994654	0.987991	0.93264	1.19602	0.812894	0.742747	0.885044	0.987991
8171139	zinc finger, BED-type containing 1 /// dehydrogenase/reductase (SDR family) X-linked	ZBED1 /// DHRSX	2.61119	2.83158	2.65663	2.70503	2.77569	2.58542	2.1702	2.40165	2.79271
8177029	zinc finger, BED-type containing 1 /// dehydrogenase/reductase (SDR family) X-linked	ZBED1 /// DHRSX	2.61119	2.83158	2.65663	2.70503	2.77569	2.58542	2.1702	2.40165	2.79271
8091887	zinc finger, B-box domain containing	ZBBX	0.66635	0.609615	0.763105	0.763105	0.808149	0.763105	0.829113	0.763105	0.787669
8094968	zygote arrest 1	ZAR1	2.90137	2.99106	2.83076	3.06501	2.92231	2.92093	2.88384	2.84414	2.71785
8043725	zeta-chain (TCR) associated protein kinase 70kDa	ZAP70	1.0085	1.15132	1.12972	1.32802	0.954481	1.33665	1.10779	1.09905	1.05325
8134915	zonadhesin	ZAN	1.33516	1.33516	1.41661	1.2033	1.44236	1.1419	1.33516	1.26677	1.317
8046461	sterile alpha motif and leucine zipper containing kinase AZK	ZAK	1.06756	0.885077	0.852213	0.767967	1.10791	0.883063	0.902916	1.12819	0.925951
8023871	zinc binding alcohol dehydrogenase, domain containing 2	ZADH2	1.60129	1.34516	1.26066	1.31683	1.71343	1.15548	1.37461	1.2648	1.2648
7975632	zinc binding alcohol dehydrogenase, domain containing 1	ZADH1	0.793728	0.859011	0.933131	0.853241	0.835014	0.853241	0.819182	0.829591	0.810336
8010036	zinc activated ligand-gated ion channel	ZACN	1.27921	1.20914	1.11745	1.40373	1.02366	1.23059	1.47545	1.43997	1.42559
8166398	YY2 transcription factor	YY2	1.10495	1.27943	1.1696	0.993491	1.21342	1.00654	1.11966	1.22052	1.08504
7920799	YY1 associated protein 1	YY1AP1	1.79428	1.79793	1.77967	1.93648	1.83857	1.81368	1.68266	1.70059	2.0961
7976744	YY1 transcription factor	YY1	1.62972	1.8656	1.66727	1.87889	1.96245	1.83843	1.81761	1.79035	1.88856
8152096	tyrosine 3-monooxygenase/tryptophan 5-monooxygenase activation protein, zeta polypeptide	YWHAZ	1.26561	1.1858	1.0822	0.985537	1.04252	1.0822	0.884795	1.35948	1.42789
8050215	tyrosine 3-monooxygenase/tryptophan 5-monooxygenase activation protein, theta polypeptide /// tyrosine 3/tryptophan 5 -monooxygenase activation protein, theta polypeptide pseudogene	YWHAQ /// LOC392510	1.58689	1.63866	1.57152	1.73157	1.66233	1.64944	1.48004	1.53108	1.87552
8072577	tyrosine 3-monooxygenase/tryptophan 5-monooxygenase activation protein, eta polypeptide	YWHAH	1.78933	1.49764	1.79045	1.58912	1.8628	1.67251	1.93473	1.92156	1.83631
8140398	tyrosine 3-monooxygenase/tryptophan 5-monooxygenase activation protein, gamma polypeptide	YWHAG	1.94433	2.06842	1.69697	1.55726	1.90111	1.96047	2.04627	1.80379	2.21521
8011011	tyrosine 3-monooxygenase/tryptophan 5-monooxygenase activation protein, epsilon polypeptide /// platelet-activating factor acetylhydrolase, isoform Ib, alpha subunit 45kDa	YWHAE /// PAFAH1B1	2.65513	3.43499	2.48688	2.15535	2.5346	2.10255	2.33458	3.04861	2.90121
8055476	tyrosine 3-monooxygenase/tryptophan 5-monooxygenase activation protein, epsilon polypeptide	YWHAE	2.26573	1.76843	1.26986	1.6038	1.00224	1.56154	1.56292	1.76843	2.01305
8062880	tyrosine 3-monooxygenase/tryptophan 5-monooxygenase activation protein, beta polypeptide	YWHAB	0.883393	0.965739	0.879162	0.863273	0.902074	0.853191	0.836244	0.750533	1.07513
8146637	YTH domain family, member 3	YTHDF3	0.82121	1.06705	0.953599	0.852245	0.81446	0.745235	0.780362	0.82121	0.82121
7899519	YTH domain family, member 2	YTHDF2	1.05936	1.0497	1.02768	1.27535	0.9554	1.02517	1.05225	0.974013	1.0497
8067593	YTH domain family, member 1	YTHDF1	1.35639	1.18556	1.42369	1.35639	1.49992	1.31592	1.03941	1.19469	1.30558
8107375	YTH domain containing 2	YTHDC2	1.11853	0.838345	0.810255	0.810255	0.857313	1.02637	0.759844	0.838345	0.826828
8100714	YTH domain containing 1	YTHDC1	0.919219	0.830025	0.722261	1.11628	0.848971	0.852482	0.982449	1.01016	0.583704
8055361	yeast Sps1/Ste20-related kinase 4 (S. cerevisiae)	YSK4	0.728349	0.808262	0.773129	0.953629	0.884181	0.63424	0.639625	0.634881	0.773129
7915084	yrdC domain containing (E. coli)	YRDC	2.31446	1.96053	2.10255	2.48363	1.63495	2.80295	2.06077	2.31446	3.05376
8041197	yippee-like 5 (Drosophila)	YPEL5	0.873846	1.0497	1.08509	0.98539	1.21179	1.0497	0.883676	1.06096	1.0497
7948282	yippee-like 4 (Drosophila)	YPEL4	1.10401	0.905103	0.979759	0.899577	0.948585	0.835558	0.999869	1.1185	1.13236
8000791	yippee-like 3 (Drosophila)	YPEL3	2.03477	2.13784	1.57532	1.53241	1.56785	1.69567	1.34114	1.93384	1.588
8008819	yippee-like 2 (Drosophila)	YPEL2	1.47796	1.13429	1.13429	1.19771	0.960818	1.02137	1.13429	1.11761	1.13429
8074780	yippee-like 1 (Drosophila)	YPEL1	0.851564	1.03819	0.966337	0.899686	0.851564	0.768602	0.851564	0.851564	1.15844
7923967	YOD1 OTU deubiquinating enzyme 1 homolog (S. cerevisiae)	YOD1	1.61854	1.31406	1.5405	1.45274	1.5864	1.55452	1.4957	1.21867	1.52397
7932678	YME1-like 1 (S. cerevisiae)	YME1L1	1.03369	0.795953	0.915466	0.885247	0.88518	0.916121	0.70356	0.984973	1.03366
7975725	YLP motif containing 1	YLPM1	0.913072	0.804257	1.10236	0.921082	1.04978	0.908616	0.913072	0.913072	1.13956
8132580	YKT6 v-SNARE homolog (S. cerevisiae)	YKT6	4.81496	4.25207	3.11225	3.98279	4.42242	4.127	4.44595	4.43932	5.14768
8100076	Yip1 domain family, member 7	YIPF7	0.782345	0.765651	0.760425	0.965164	0.909228	0.701533	0.801753	0.721237	0.707195
8168018	Yip1 domain family, member 6	YIPF6	1.20281	1.33394	1.12545	1.26201	1.16894	1.12312	1.27527	1.3273	1.40763
8114829	Yip1 domain family, member 5	YIPF5	0.775441	0.958817	0.965492	0.846487	0.925146	0.733591	0.790908	0.978158	0.726276
8041273	Yip1 domain family, member 4	YIPF4	0.952706	1.12532	1.01541	0.959732	0.931589	1.04291	1.05582	0.893256	1.01541
8126574	Yip1 domain family, member 3	YIPF3	3.37471	3.91716	3.08597	3.4467	3.20298	3.89902	3.70704	3.53424	3.92171
8034108	Yip1 domain family, member 2	YIPF2	2.54137	2.33173	3.07169	2.68269	2.43275	2.60939	2.40021	2.27346	2.81726
7916343	Yip1 domain family, member 1	YIPF1	1.08899	1.19257	1.0239	1.20448	1.23228	1.19257	1.12341	1.28103	1.33704
8036483	Yip1 interacting factor homolog B (S. cerevisiae)	YIF1B	3.18693	3.56335	2.89784	2.75567	2.86732	2.93192	2.82708	3.15285	2.8761
7949577	Yip1 interacting factor homolog A (S. cerevisiae)	YIF1A	2.49005	2.49442	2.93614	2.20581	2.57441	2.54361	3.37084	3.03405	3.54269
8021984	v-yes-1 Yamaguchi sarcoma viral oncogene homolog 1	YES1	0.854834	0.660678	0.684545	0.684603	0.952658	0.827417	0.774678	0.791195	0.763105
7957032	YEATS domain containing 4	YEATS4	0.93192	0.748884	0.948149	1.00438	0.888397	0.879736	0.856719	0.856719	0.841489
8084232	YEATS domain containing 2	YEATS2	1.30668	1.12649	1.01465	1.05405	1.17721	1.15062	1.07233	1.19895	1.18752
8074773	YdjC homolog (bacterial)	YDJC	1.7028	2.06677	1.98809	2.1475	2.00306	1.86681	1.94467	1.89922	2.02807
8012140	Y box binding protein 2	YBX2	4.57816	4.61506	4.47306	4.57816	4.62191	4.6086	4.514	4.63429	4.65733
8142084	Y box binding protein 1 pseudogene 2	YBX1P2	0.98345	1.53241	1.66684	1.17258	1.53241	1.37342	1.38035	1.53241	1.91355
7900585	Y box binding protein 1	YBX1	5.94908	5.4599	5.15144	4.55643	4.45104	4.95149	5.13519	4.90295	5.53278
7962203	tyrosyl-tRNA synthetase 2, mitochondrial	YARS2	1.06465	0.940512	0.877965	1.21863	0.868488	0.706649	1.0205	0.868488	0.768196
7914563	tyrosyl-tRNA synthetase	YARS	1.09952	1.11866	0.820642	1.0998	1.16402	1.19453	1.26629	1.3427	1.58435
7943398	Yes-associated protein 1, 65kDa	YAP1	1.65157	1.57487	1.87019	1.5761	1.35468	1.32038	1.62118	1.70205	1.80259
7962358	YY1 associated factor 2	YAF2	1.13236	1.14969	1.13236	1.10123	1.13997	1.13236	1.14393	1.11339	1.08775
8008297	xylosyltransferase II	XYLT2	2.18767	2.53052	1.7114	1.98477	1.98477	1.90948	2.49526	1.6891	2.80555
7999754	xylosyltransferase I	XYLT1	1.49604	1.70657	1.57514	1.56361	1.34376	1.70723	1.23185	2.00813	1.57514
8078784	xylulokinase homolog (H. influenzae)	XYLB	1.19478	0.969137	0.808837	0.886213	0.768981	0.652053	0.886213	0.839062	0.947745
8170052	cancer/testis antigen CT45-1 /// cancer/testis antigen CT45 /// cancer/testis antigen CT45-3 /// cancer/testis antigen CT45-4 /// cancer/testis antigen CT45-5 /// cancer/testis antigen CT45-6	XX-FW88277B6.1 /// RP13-36C9.1 /// RP13-36C9.3 /// CT45-4 /// RP13-36C9.6 /// CT45-6	0.88251	0.885936	0.963729	0.890015	0.814974	0.901896	0.912255	0.898738	0.670376
8175353	cancer/testis antigen CT45-1 /// cancer/testis antigen CT45 /// cancer/testis antigen CT45-3 /// cancer/testis antigen CT45-4 /// cancer/testis antigen CT45-5 /// cancer/testis antigen CT45-6	XX-FW88277B6.1 /// RP13-36C9.1 /// RP13-36C9.3 /// CT45-4 /// RP13-36C9.6 /// CT45-6	0.872803	0.851564	0.851564	0.940148	0.830596	0.869747	0.900093	0.851564	0.747712
8175344	cancer/testis antigen CT45-1 /// cancer/testis antigen CT45 /// cancer/testis antigen CT45-3 /// cancer/testis antigen CT45-4 /// cancer/testis antigen CT45-5 /// cancer/testis antigen CT45-6	XX-FW88277B6.1 /// RP13-36C9.1 /// RP13-36C9.3 /// CT45-4 /// RP13-36C9.6 /// CT45-6	0.950878	0.92766	0.887147	0.878132	0.848693	0.862543	0.949325	0.844245	0.775249
8170068	cancer/testis antigen CT45-1 /// cancer/testis antigen CT45 /// cancer/testis antigen CT45-3 /// cancer/testis antigen CT45-4 /// cancer/testis antigen CT45-5 /// cancer/testis antigen CT45-6	XX-FW88277B6.1 /// RP13-36C9.1 /// RP13-36C9.3 /// CT45-4 /// RP13-36C9.6 /// CT45-6	0.976268	0.928506	0.991925	0.919997	0.748752	0.911027	0.977035	0.920686	0.879566
8170060	cancer/testis antigen CT45-1 /// cancer/testis antigen CT45 /// cancer/testis antigen CT45-3 /// cancer/testis antigen CT45-4 /// cancer/testis antigen CT45-5 /// cancer/testis antigen CT45-6	XX-FW88277B6.1 /// RP13-36C9.1 /// RP13-36C9.3 /// CT45-4 /// RP13-36C9.6 /// CT45-6	0.987829	0.906081	0.888601	0.927803	0.841462	0.888601	0.954609	0.888601	0.79277
8175336	cancer/testis antigen CT45-1 /// cancer/testis antigen CT45 /// cancer/testis antigen CT45-3 /// cancer/testis antigen CT45-4 /// cancer/testis antigen CT45-5 /// cancer/testis antigen CT45-6	XX-FW88277B6.1 /// RP13-36C9.1 /// RP13-36C9.3 /// CT45-4 /// RP13-36C9.6 /// CT45-6	0.936785	0.884773	0.9191	0.896687	0.740887	0.878651	0.955634	0.878651	0.791173
8000884	XTP3-transactivated protein A	XTP3TPA	1.70223	1.96847	2.12702	2.03444	2.17861	1.98208	1.98208	1.98208	1.9162
7950447	X-ray radiation resistance associated 1	XRRA1	0.929989	0.817582	0.799654	1.17442	0.931844	1.038	0.947325	0.936691	1.02206
8061324	5'-3' exoribonuclease 2	XRN2	0.928223	0.864957	0.673053	0.735122	1.11588	0.897866	0.918992	0.842768	0.864957
8091141	5'-3' exoribonuclease 1	XRN1	0.827376	0.871165	0.776831	0.793315	0.68699	0.770788	0.770788	0.770788	0.770788
7956648	XRCC6 binding protein 1	XRCC6BP1	0.614135	0.862247	0.860308	0.737539	0.828751	0.800479	0.686925	0.712691	0.770476
8073457	X-ray repair complementing defective repair in Chinese hamster cells 6 (Ku autoantigen, 70kDa)	XRCC6	1.47233	1.40861	1.15928	1.25745	1.46102	1.21795	1.5457	1.53	1.79978
8048146	X-ray repair complementing defective repair in Chinese hamster cells 5 (double-strand-break rejoining; Ku autoantigen, 80kDa)	XRCC5	1.51176	1.07717	1.33529	1.29578	1.67052	1.21728	1.21728	1.12732	1.22052
8106730	X-ray repair complementing defective repair in Chinese hamster cells 4	XRCC4	0.738523	0.773656	0.643573	0.754392	0.72039	0.788234	0.705409	0.818583	0.762977
7981447	X-ray repair complementing defective repair in Chinese hamster cells 3	XRCC3	1.72094	1.79222	1.74039	1.63576	1.71033	1.37886	1.87715	1.95643	1.66383
8144036	X-ray repair complementing defective repair in Chinese hamster cells 2	XRCC2	0.864113	0.717917	0.873134	0.85068	0.762421	1.02426	0.777641	0.888809	0.770642
8037331	X-ray repair complementing defective repair in Chinese hamster cells 1	XRCC1	2.0523	2.4124	1.63699	2.07659	1.74321	2.02947	2.10408	1.88857	2.47384
7907861	xenotropic and polytropic retrovirus receptor	XPR1	0.801059	0.949556	0.801732	1.19995	1.02268	0.949863	0.963562	0.860388	0.93155
7956785	exportin, tRNA (nuclear export receptor for tRNAs)	XPOT	1.23032	1.67577	1.17529	1.44568	0.97576	1.01239	1.14725	0.898849	2.37618
8144953	exportin 7	XPO7	1.00198	1.14507	1.11451	1.04113	1.58523	1.17461	1.06362	1.36902	1.135
8000482	exportin 6	XPO6	1.54141	1.39931	1.25288	1.29255	1.66553	1.31204	1.63111	1.65837	2.7636
8126588	exportin 5	XPO5	0.905465	0.895509	0.911244	0.905465	0.905465	0.819667	0.868528	0.922803	0.84514
7970473	exportin 4	XPO4	1.26699	1.16845	1.02889	0.935699	0.932747	0.835887	1.02007	1.19518	0.913219
8052526	exportin 1 (CRM1 homolog, yeast)	XPO1	0.865543	0.817423	0.874358	0.885707	0.817423	0.829322	0.731364	0.686408	0.728148
8073311	X-prolyl aminopeptidase (aminopeptidase P) 3, putative	XPNPEP3	0.99989	0.948058	1.0497	0.935578	0.900031	0.99989	0.99989	0.908161	0.99989
8169836	X-prolyl aminopeptidase (aminopeptidase P) 2, membrane-bound	XPNPEP2	0.948379	0.779942	1.16569	1.13912	1.05196	1.14767	1.53887	1.0277	1.10121
7936284	X-prolyl aminopeptidase (aminopeptidase P) 1, soluble	XPNPEP1	1.36594	1.76123	2.03643	1.70816	1.30757	1.64821	1.64821	1.64519	1.45115
8085486	xeroderma pigmentosum, complementation group C	XPC	1.02183	0.846525	0.903819	1.0049	0.901771	0.891129	0.901771	1.06816	0.863251
8162696	xeroderma pigmentosum, complementation group A	XPA	0.859993	0.75092	0.854874	0.774127	0.803612	0.947407	0.725572	0.867707	0.813933
8176675	XK, Kell blood group complex subunit-related, Y-linked /// XK, Kell blood group complex subunit-related, Y-linked 2	XKRY /// XKRY2	0.806638	0.873627	0.777889	0.766302	0.763105	0.763105	0.763105	0.825522	0.759908
8177180	XK, Kell blood group complex subunit-related, Y-linked /// XK, Kell blood group complex subunit-related, Y-linked 2	XKRY /// XKRY2	0.806638	0.873627	0.777889	0.766302	0.763105	0.763105	0.763105	0.825522	0.759908
8173999	XK, Kell blood group complex subunit-related, X-linked	XKRX	0.794332	0.841985	1.0812	0.81418	0.576145	0.632597	1.02781	0.645004	0.89243
8146900	XK, Kell blood group complex subunit-related family, member 9	XKR9	0.790015	0.736714	0.685783	0.753537	0.712537	0.874082	0.840304	0.817423	0.662358
7899417	XK, Kell blood group complex subunit-related family, member 8	XKR8	1.31102	1.22331	1.15132	1.13084	1.10858	1.15095	1.03055	0.925289	1.33912
8061647	XK, Kell blood group complex subunit-related family, member 7	XKR7	1.26502	1.19568	1.38873	1.13236	1.37468	1.59778	1.32038	1.32038	1.32038
8149307	XK, Kell blood group complex subunit-related family, member 6	XKR6	1.06242	1.06242	1.06242	0.948579	1.15094	1.15385	1.06242	1.06242	1.00928
8149086	XK, Kell blood group complex subunit-related family, member 5	XKR5	0.954618	0.953006	0.894439	1.12	1.20665	1.01488	1.12	1.21941	1.13659
8146475	XK, Kell blood group complex subunit-related family, member 4	XKR4	1.03172	1.26386	1.01048	1.08754	0.905873	1.12315	1.01048	1.12703	0.914647
8074204	XK, Kell blood group complex subunit-related family, member 3	XKR3	0.955155	0.71802	0.929267	0.826912	0.762253	0.805867	0.689173	0.917477	0.860971
8166723	X-linked Kx blood group (McLeod syndrome)	XK	1.66128	1.10597	1.38024	1.01427	1.12555	1.36915	1.13316	1.35581	1.16115
8046062	xin actin-binding repeat containing 2	XIRP2	0.695208	0.807497	0.838627	0.846084	0.68373	0.86063	0.727156	0.807497	0.929374
8086341	xin actin-binding repeat containing 1 /// hypothetical protein LOC642987	XIRP1 /// FLJ43080	1.14297	1.02554	1.28346	1.52265	1.18044	1.42341	1.16936	1.26211	1.23881
8169742	X-linked inhibitor of apoptosis	XIAP	0.806785	1.06224	0.851564	0.719703	0.767098	0.768196	1.09894	0.851564	0.851564
8165808	Xg blood group	XG	1.40728	1.46358	1.36403	1.7939	1.54936	1.51555	1.73003	1.55288	1.45603
8051322	xanthine dehydrogenase	XDH	0.819515	0.987991	1.18472	1.01905	0.921576	0.903217	0.812746	0.987991	1.06832
8086595	chemokine (C motif) receptor 1	XCR1	1.51327	1.59358	1.23996	1.96223	1.50749	1.42741	1.85479	1.59358	1.23921
7922127	chemokine (C motif) ligand 2	XCL2	0.729952	0.795978	0.94395	1.02032	0.769986	0.66896	0.516312	1.3222	1.24561
7907156	chemokine (C motif) ligand 1	XCL1	0.850616	0.674603	0.766832	0.98927	0.846827	0.899359	0.676392	0.898392	0.856719
8075182	X-box binding protein 1	XBP1	2.10557	2.03119	2.10581	2.12353	1.91877	2.19174	2.35168	2.0769	3.00659
8167742	X antigen family, member 5	XAGE5	0.955806	0.948973	0.882113	0.865467	0.702336	0.717851	0.636212	0.751474	0.717851
8172806	X antigen family, member 3	XAGE3	0.866074	0.977517	0.893479	0.915179	1.11413	0.855769	0.701605	0.95197	0.918925
8167693	X antigen family, member 2 /// X antigen family, member 2-like	XAGE2 /// CTD-2267G17.3	1.01521	1.33117	1.01521	1.20994	1.11418	1.01521	0.808031	1.00994	0.883571
8172749	X antigen family, member 2 /// X antigen family, member 2-like	XAGE2 /// CTD-2267G17.3	1.01521	1.33117	1.01521	1.20994	1.11418	1.01521	0.808031	1.00994	0.883571
8167701	X antigen family, member 1D /// X antigen family, member 1C /// X antigen family, member 1E /// X antigen family, member 1 /// X antigen family, member 1B	XAGE1D /// XAGE1C /// XAGE1E /// XAGE1 /// XAGE1B	1.07805	1.23867	1.21058	1.58153	1.14134	1.23867	1.23867	1.23867	1.32719
8167710	X antigen family, member 1D /// X antigen family, member 1C /// X antigen family, member 1E /// X antigen family, member 1 /// X antigen family, member 1B	XAGE1D /// XAGE1C /// XAGE1E /// XAGE1 /// XAGE1B	1.07805	1.23867	1.21058	1.58153	1.14134	1.23867	1.23867	1.23867	1.32719
8172739	X antigen family, member 1D /// X antigen family, member 1C /// X antigen family, member 1E /// X antigen family, member 1 /// X antigen family, member 1B	XAGE1D /// XAGE1C /// XAGE1E /// XAGE1 /// XAGE1B	1.07805	1.23867	1.21058	1.58153	1.14134	1.23867	1.23867	1.23867	1.32719
8172757	X antigen family, member 1D /// X antigen family, member 1C /// X antigen family, member 1E /// X antigen family, member 1 /// X antigen family, member 1B	XAGE1D /// XAGE1C /// XAGE1E /// XAGE1 /// XAGE1B	1.07805	1.23867	1.21058	1.58153	1.14134	1.23867	1.23867	1.23867	1.32719
8172766	X antigen family, member 1D /// X antigen family, member 1C /// X antigen family, member 1E /// X antigen family, member 1 /// X antigen family, member 1B	XAGE1D /// XAGE1C /// XAGE1E /// XAGE1 /// XAGE1B	1.07805	1.23867	1.21058	1.58153	1.14134	1.23867	1.23867	1.23867	1.32719
8004184	XIAP associated factor 1	XAF1	0.833347	0.958728	0.958728	1.0579	0.94835	1.05722	1.21942	1.00298	1.07876
8033392	XPA binding protein 2	XAB2	1.12495	1.1699	1.18091	1.17143	1.18091	1.02061	1.25367	1.12607	1.28452
8091422	WW domain containing transcription regulator 1	WWTR1	1.58136	2.33672	2.25447	2.2622	1.98477	1.99386	2.52787	2.58701	2.95773
7996976	WW domain containing E3 ubiquitin protein ligase 2	WWP2	1.16975	1.20037	1.21405	1.11827	1.08779	1.13593	1.13593	1.14895	1.36285
8147156	WW domain containing E3 ubiquitin protein ligase 1	WWP1	0.859216	0.799641	0.887943	0.89648	1.24758	0.870369	0.825875	0.978309	0.760145
7997352	WW domain containing oxidoreductase	WWOX	0.993153	0.987572	0.993153	0.847885	0.931922	1.02699	1.0687	0.990398	1.1774
8165947	WWC family member 3	WWC3	1.17501	1.21015	1.17621	1.23336	1.15647	0.985169	1.23336	1.25134	1.30766
8098470	WW and C2 domain containing 2	WWC2	0.865168	0.670293	0.749815	1.1424	0.94413	0.854622	0.907929	0.832366	0.927573
8109773	WW and C2 domain containing 1	WWC1	0.996935	0.933876	1.00663	0.996935	1.11139	0.955347	1.14165	0.993115	0.996935
8027665	Wilms tumor 1 interacting protein	WTIP	2.32292	2.32292	2.32292	2.31108	2.32292	2.7627	2.35312	1.96353	2.24742
8126952	Wilms tumor 1 associated protein	WTAP	2.94125	2.40589	2.40589	1.90825	2.20129	2.3075	2.30544	2.40589	2.94875
8123129	Wilms tumor 1 associated protein	WTAP	1.81808	1.7531	1.57594	1.8127	1.72522	1.50063	1.5272	1.69568	1.809
7947363	Wilms tumor 1	WT1	1.93038	1.85711	1.94557	1.90856	2.24533	1.94557	1.94557	1.70763	2.08205
7958398	WSC domain containing 2	WSCD2	1.22379	1.20261	1.27487	1.2294	1.22026	1.27045	1.14573	1.51851	1.27045
8004152	WSC domain containing 1	WSCD1	1.14539	1.15321	1.09531	1.03973	1.07667	1.03855	0.934854	0.983512	1.03821
7966829	WD repeat and SOCS box-containing 2	WSB2	5.08301	5.15625	3.96531	2.94643	3.23583	3.48256	3.99058	4.35086	4.97408
8005765	WD repeat and SOCS box-containing 1	WSB1	1.00881	0.862464	0.893023	0.790942	1.0637	1.00881	0.941864	1.01847	1.21835
8116595	Werner helicase interacting protein 1	WRNIP1	1.69228	1.74932	1.59489	1.92128	1.64415	1.757	1.93798	1.95003	2.21829
8145702	Werner syndrome	WRN	0.962571	0.866587	0.794737	0.794737	0.723498	0.756732	0.779432	0.710296	0.767651
8068612	tryptophan rich basic protein	WRB	1.21373	0.963099	0.939929	1.03589	0.861596	0.732162	0.933028	0.771706	1.35964
8007895	wingless-type MMTV integration site family, member 9B	WNT9B	1.8049	1.517	1.82721	1.67065	1.96953	1.6886	1.51144	1.7858	1.78001
7924832	wingless-type MMTV integration site family, member 9A	WNT9A	1.3924	1.3924	1.37229	1.5301	1.3924	1.44121	1.17846	1.3924	1.3924
7929822	wingless-type MMTV integration site family, member 8B	WNT8B	0.825628	0.94438	0.997259	0.977801	1.17474	0.951404	0.969171	0.969171	0.912235
8108287	wingless-type MMTV integration site family, member 8A	WNT8A	0.944207	0.969422	1.14901	1.14302	0.990045	0.824016	0.957879	1.21861	0.770764
8076734	wingless-type MMTV integration site family, member 7B	WNT7B	1.87194	1.63192	1.84745	1.79916	1.65884	1.36619	1.66376	1.66551	1.48942
8085475	wingless-type MMTV integration site family, member 7A	WNT7A	1.22052	1.14381	1.17622	1.25848	0.983751	1.28802	1.22052	1.23757	1.22052
8048445	wingless-type MMTV integration site family, member 6	WNT6	2.65527	2.64642	2.50406	2.6232	2.41416	2.40399	2.49905	2.61757	2.54343
7953012	wingless-type MMTV integration site family, member 5B	WNT5B	0.984696	1.21962	1.19742	0.999243	1.26777	1.16141	1.18597	1.29759	1.21392
8088180	wingless-type MMTV integration site family, member 5A	WNT5A	1.00349	1.08913	1.18826	0.978389	0.978389	0.976461	1.09754	0.978389	0.971858
7913547	wingless-type MMTV integration site family, member 4	WNT4	1.97492	1.4614	1.84919	1.73911	1.67016	1.65883	1.69409	1.93823	1.67381
7910217	wingless-type MMTV integration site family, member 3A	WNT3A	1.23336	1.33947	1.42809	1.23129	1.29825	1.27193	1.25301	1.42488	1.54598
8016311	wingless-type MMTV integration site family, member 3	WNT3	1.1981	1.274	0.833521	1.25357	1.38108	1.25357	1.25357	1.25357	1.25357
7904025	wingless-type MMTV integration site family, member 2B	WNT2B	0.968643	1.02	1.26167	1.02	0.851564	0.814233	1.02	0.989807	1.05227
8142471	wingless-type MMTV integration site family member 2	WNT2	1.0559	0.978205	0.861532	0.779503	0.858066	0.886518	1.12958	0.86381	0.966357
8135763	wingless-type MMTV integration site family, member 16	WNT16	1.03464	1.03464	0.922803	1.19191	0.955268	1.07308	0.804679	1.03464	1.2605
7950534	wingless-type MMTV integration site family, member 11	WNT11	1.15592	1.01694	1.15592	1.18297	1.58855	0.870404	1.17376	1.13235	1.27414
7962918	wingless-type MMTV integration site family, member 10B	WNT10B	1.0599	1.12708	1.16141	1.03211	1.11206	1.07845	1.1384	1.52297	1.0599
8048452	wingless-type MMTV integration site family, member 10A	WNT10A	2.3735	2.25695	2.32819	2.47514	2.25695	2.38456	2.30756	2.80658	2.25695
7955170	wingless-type MMTV integration site family, member 1	WNT1	1.71339	1.84058	1.56841	1.67957	1.72955	1.38483	1.78037	1.67329	1.4238
8007363	WNK lysine deficient protein kinase 4	WNK4	1.10513	0.951566	1.23325	1.2167	1.08688	0.989805	0.970969	1.16318	1.07825
8173059	WNK lysine deficient protein kinase 3	WNK3	0.701083	0.763105	0.717677	0.763105	0.962616	0.796287	0.811634	0.687864	0.768196
8156415	WNK lysine deficient protein kinase 2	WNK2	1.1805	1.1805	1.14859	1.06439	1.05395	1.05323	1.27337	1.34253	1.28528
7952953	WNK lysine deficient protein kinase 1	WNK1	1.02816	0.994654	1.22685	1.04928	1.0599	0.981393	1.17015	1.13995	1.1675
8035040	widely interspaced zinc finger motifs	WIZ	1.82865	1.78306	1.66674	1.61186	1.70255	1.80853	1.68416	1.89325	1.82072
7939131	Wilms tumor upstream neighbor 1	WIT1	1.0497	0.910813	1.18156	1.0497	0.94249	1.16585	0.956783	1.12208	1.0497
8121532	WNT1 inducible signaling pathway protein 3	WISP3	0.883602	0.652053	0.767052	0.883602	1.1288	0.736682	0.883602	1.26652	0.868302
8062864	WNT1 inducible signaling pathway protein 2	WISP2	2.78753	2.70476	2.82551	2.94967	3.13089	2.79947	2.79438	2.81704	2.78876
8148435	WNT1 inducible signaling pathway protein 1	WISP1	1.50707	1.42177	2.0536	1.54035	1.53077	1.74562	1.59205	1.25452	1.40414
8131303	WD repeat domain, phosphoinositide interacting 2	WIPI2	1.63541	1.53259	1.41404	1.41485	1.5937	1.64271	1.44289	1.55595	1.65723
8017850	WD repeat domain, phosphoinositide interacting 1	WIPI1	2.46504	2.90325	2.35372	2.39615	2.49619	2.49368	2.33054	2.09808	2.62795
8132036	WAS/WASL interacting protein family, member 3	WIPF3	1.84768	1.62742	1.75809	1.40887	1.41793	1.22385	1.27248	1.42495	1.43059
8007058	WAS/WASL interacting protein family, member 2	WIPF2	1.48327	1.31421	1.30402	1.48802	1.31421	1.27411	1.60534	1.31421	1.38805
8056860	WAS/WASL interacting protein family, member 1	WIPF1	1.58503	1.6322	1.486	1.42495	1.42699	1.18608	1.29065	1.49624	1.4394
7964722	WNT inhibitory factor 1	WIF1	0.884775	0.946927	1.0497	1.09346	0.858468	1.01966	0.946927	1.21053	0.863589
7963965	within bgcn homolog (Drosophila)	WIBG	1.65491	1.53299	1.43701	1.74134	1.55616	1.60607	1.61653	1.75985	1.46419
8098942	Wolf-Hirschhorn syndrome candidate 2	WHSC2	1.77711	1.86969	1.68788	1.92736	1.75465	1.77711	1.91572	1.77711	1.60518
8150287	Wolf-Hirschhorn syndrome candidate 1-like 1	WHSC1L1	0.764135	0.746226	0.819535	1.00844	0.809948	0.927924	0.902208	0.863827	1.04258
8093539	Wolf-Hirschhorn syndrome candidate 1	WHSC1	1.15075	1.20261	1.02947	1.20261	1.17296	1.25889	1.21716	1.22947	1.20502
7986687	WAS protein homology region 2 domain containing 1-like 1 /// WAS protein homology region 2 domain containing 1-like 2 /// similar to junction-mediating and regulatory protein	WHDC1L1 /// WHDC1L2 /// LOC652637	0.820809	0.851885	1.05453	0.743963	0.851885	1.01016	0.848188	0.833732	0.985407
7985482	WAS protein homology region 2 domain containing 1	WHDC1	1.4307	1.37248	1.29673	1.47727	1.29984	1.45668	1.44984	1.56565	1.44803
8093906	Wolfram syndrome 1 (wolframin)	WFS1	1.48051	1.39543	1.26042	1.38676	1.38676	1.2306	1.38607	1.38676	1.32639
8008511	WAP, follistatin/kazal, immunoglobulin, kunitz and netrin domain containing 2	WFIKKN2	1.43101	1.30271	1.26551	1.40866	1.92559	1.15226	1.34204	1.55618	1.30354
7991927	WAP, follistatin/kazal, immunoglobulin, kunitz and netrin domain containing 1	WFIKKN1	1.74193	1.96129	2.2124	1.67052	2.05014	1.72713	1.96129	2.12625	1.9839
8066559	WAP four-disulfide core domain 9	WFDC9	1.03172	0.936095	0.915116	1.06249	0.915116	0.862538	0.915116	1.14451	0.915116
8066549	WAP four-disulfide core domain 8	WFDC8	0.690005	0.871992	0.853663	0.854938	0.810748	0.84028	0.766266	0.783174	0.754695
8066536	WAP four-disulfide core domain 6 /// serine peptidase inhibitor-like, with Kunitz and WAP domains 1 (eppin)	WFDC6 /// SPINLW1	1.07941	0.907315	1.22196	0.960159	1.03987	1.00493	1.23226	1.04563	0.924188
8066482	WAP four-disulfide core domain 5	WFDC5	1.27433	1.08753	1.02556	1.13296	1.1914	1.00062	1.0912	1.18415	1.01176
8066579	WAP four-disulfide core domain 3	WFDC3	1.28714	1.12109	0.998449	0.872911	1.07427	1.0511	0.943481	1.00773	1.01288
8063000	WAP four-disulfide core domain 2	WFDC2	1.25002	1.58723	1.76154	1.67052	1.2356	1.38093	1.4365	1.48606	1.48004
8063014	WAP four-disulfide core domain 13	WFDC13	1.0599	1.15671	0.899289	1.09299	0.901719	0.870042	1.38773	1.44695	0.961504
8066489	WAP four-disulfide core domain 12	WFDC12	0.954979	0.970003	1.0143	0.914006	0.763105	0.953249	0.831928	0.998484	0.910994
8066569	WAP four-disulfide core domain 11	WFDC11	0.920824	0.847733	0.887555	0.819844	0.857217	1.18794	0.795993	0.851386	0.842991
8066574	WAP four-disulfide core domain 10B	WFDC10B	1.05984	0.868895	0.871651	0.933817	0.851564	0.672771	0.718061	0.983208	0.780445
8063011	WAP four-disulfide core domain 10A	WFDC10A	0.783261	0.775676	0.974682	1.34931	0.878838	1.02125	0.776351	1.08449	0.902317
7997582	WAP four-disulfide core domain 1	WFDC1	1.15687	1.2882	1.54622	1.57496	1.30656	1.46448	1.3048	1.53367	1.51838
7938348	WEE1 homolog (S. pombe)	WEE1	1.12651	1.15022	1.15086	1.2464	1.39741	1.11118	1.18176	1.19623	1.1375
7938364	WEE1 homolog (S. pombe)	WEE1	0.841906	0.841906	1.03753	0.899686	0.68373	1.09613	0.820969	0.885439	0.700688
7938366	WEE1 homolog (S. pombe)	WEE1	0.903802	0.755575	0.787252	0.787252	0.787252	0.820434	0.703914	0.831157	0.851564
7899289	WD and tetratricopeptide repeats 1	WDTC1	2.48618	2.01766	1.80563	1.11341	1.51454	1.7412	1.49992	1.55549	1.93917
8056047	WD repeat, sterile alpha motif and U-box domain containing 1	WDSUB1	0.694456	0.699267	0.913362	0.812704	0.770291	0.792824	0.92496	0.774374	0.696552
8147785	WD repeats and SOF1 domain containing	WDSOF1	1.08077	1.11203	1.02907	1.13385	0.936387	0.795173	1.0303	1.02907	0.981722
7985898	WD repeat domain 93	WDR93	1.33712	1.31118	1.04268	0.933589	1.18788	1.14655	0.795197	0.842581	1.13526
8052703	WD repeat domain 92	WDR92	0.890715	0.989106	0.890715	0.890715	0.766415	0.890715	0.890715	0.809471	0.923897
8052733	WD repeat domain 92	WDR92	1.24713	0.980645	0.770918	1.18722	1.01439	1.09198	0.59699	0.480343	0.628454
8052731	WD repeat domain 92	WDR92	0.953904	1.01048	1.01048	1.2015	1.05154	1.01048	0.920833	1.07656	1.01048
8052719	WD repeat domain 92	WDR92	1.51804	1.59469	1.85255	1.64652	1.98477	1.41305	1.9897	1.59469	1.59469
8143070	WD repeat domain 91	WDR91	1.00217	1.00217	1.07341	0.790942	0.999821	1.24446	0.993103	1.05305	0.950813
7991939	WD repeat domain 90	WDR90	1.48029	1.44518	1.52325	1.52189	1.34536	1.49519	1.66773	1.61035	1.52189
7979565	WD repeat domain 89	WDR89	1.31105	0.851627	1.28886	0.988208	0.697804	0.705776	0.855593	0.868495	0.856719
7942791	WD repeat domain 88 /// 28S ribosomal RNA	WDR88 /// LOC100008589	12.8629	12.8848	12.7022	12.5079	12.8077	12.7266	12.7027	12.7475	12.9747
8027543	WD repeat domain 88	WDR88	0.895938	1.02734	0.919905	0.919905	0.926548	0.919905	0.8223	0.919905	0.828378
8036451	WD repeat domain 87	WDR87	1.06043	0.958601	0.960214	0.764271	0.736906	0.898235	0.983113	0.93333	0.954413
8143941	WD repeat domain 86	WDR86	1.9811	1.98477	2.06357	2.22824	2.18012	2.09675	2.13678	1.82803	2.20526
8165610	WD repeat domain 85	WDR85	1.28604	1.24484	1.24666	1.1581	1.50611	1.20048	1.17982	1.52844	1.22792
8087874	WD repeat domain 82	WDR82	0.815555	0.866587	0.823918	0.899686	1.15132	1.26137	0.806964	1.76843	2.13937
8003639	WD repeat domain 81	WDR81	1.13711	1.26854	1.18719	1.30987	1.24755	1.24082	1.11852	1.18656	1.18719
7911839	WD repeat domain 8	WDR8	0.81565	0.978458	1.00876	0.850046	0.896855	0.92465	1.17247	0.86776	1.24206
8004556	WD repeat domain 79	WDR79	0.979595	1.09897	0.96117	1.0493	1.00271	1.04257	1.24805	1.07672	0.969452
7916789	WD repeat domain 78	WDR78	0.843913	1.13693	0.774515	0.785287	0.632158	1.22168	0.859478	0.870494	0.838167
7918517	WD repeat domain 77	WDR77	1.81204	1.98572	1.81204	1.49153	1.55647	1.65262	1.86876	1.63576	2.29606
7983306	WD repeat domain 76	WDR76	1.0599	0.940248	0.957818	1.07713	1.03334	0.923095	0.999235	1.01969	0.993613
8046975	WD repeat domain 75	WDR75	0.669585	0.824301	0.879119	0.617548	0.804952	0.714524	0.719976	0.719131	0.791238
8019802	WD repeat domain 74 /// RNA, U2 small nuclear /// RNA, U2B small nuclear	WDR74 /// RNU2 /// RNU2B	7.64303	7.99974	7.13328	6.85523	7.3639	6.86731	7.44561	6.22281	7.13254
8019709	WD repeat domain 74 /// RNA, U2 small nuclear /// RNA, U2B small nuclear	WDR74 /// RNU2 /// RNU2B	7.77733	7.84105	6.55438	6.69713	7.12495	7.02725	7.16068	6.71036	7.14777
8019631	WD repeat domain 74 /// RNA, U2 small nuclear /// RNA, U2B small nuclear	WDR74 /// RNU2 /// RNU2B	7.96203	7.87582	6.51663	6.87277	7.38607	6.68349	7.41211	6.76225	6.95756
8019633	WD repeat domain 74 /// RNA, U2 small nuclear /// RNA, U2B small nuclear	WDR74 /// RNU2 /// RNU2B	7.96203	7.87582	6.51663	6.87277	7.38607	6.68349	7.41211	6.76225	6.95756
8019635	WD repeat domain 74 /// RNA, U2 small nuclear /// RNA, U2B small nuclear	WDR74 /// RNU2 /// RNU2B	7.96203	7.87582	6.51663	6.87277	7.38607	6.68349	7.41211	6.76225	6.95756
8019637	WD repeat domain 74 /// RNA, U2 small nuclear /// RNA, U2B small nuclear	WDR74 /// RNU2 /// RNU2B	7.96203	7.87582	6.51663	6.87277	7.38607	6.68349	7.41211	6.76225	6.95756
8019639	WD repeat domain 74 /// RNA, U2 small nuclear /// RNA, U2B small nuclear	WDR74 /// RNU2 /// RNU2B	7.96203	7.87582	6.51663	6.87277	7.38607	6.68349	7.41211	6.76225	6.95756
8019641	WD repeat domain 74 /// RNA, U2 small nuclear /// RNA, U2B small nuclear	WDR74 /// RNU2 /// RNU2B	7.96203	7.87582	6.51663	6.87277	7.38607	6.68349	7.41211	6.76225	6.95756
8019703	WD repeat domain 74 /// RNA, U2 small nuclear /// RNA, U2B small nuclear	WDR74 /// RNU2 /// RNU2B	7.96203	7.87582	6.51663	6.87277	7.38607	6.68349	7.41211	6.76225	6.95756
8019705	WD repeat domain 74 /// RNA, U2 small nuclear /// RNA, U2B small nuclear	WDR74 /// RNU2 /// RNU2B	7.96203	7.87582	6.51663	6.87277	7.38607	6.68349	7.41211	6.76225	6.95756
8019707	WD repeat domain 74 /// RNA, U2 small nuclear /// RNA, U2B small nuclear	WDR74 /// RNU2 /// RNU2B	7.96203	7.87582	6.51663	6.87277	7.38607	6.68349	7.41211	6.76225	6.95756
7948881	WD repeat domain 74	WDR74	1.4285	1.53872	1.64836	1.28515	1.24945	1.23557	1.51937	1.51008	1.7021
7948894	WD repeat domain 74	WDR74	1.94009	2.27535	0.998698	1.09625	1.26134	1.39533	1.85159	1.15888	1.17081
7991126	WD repeat domain 73	WDR73	1.34591	1.31774	1.52553	1.17327	1.44463	1.05467	1.39281	1.33574	1.31774
7988990	WD repeat domain 72	WDR72	0.815927	0.890776	0.69964	0.754509	0.907095	0.894401	0.681112	0.753999	0.758982
8104998	WD repeat domain 70	WDR70	0.783418	1.19149	0.75876	0.815772	1.00924	0.92196	0.874583	1.01052	0.977008
8021312	WD repeat domain 7	WDR7	0.827009	0.912662	1.20074	0.912662	0.912662	0.652053	0.912662	0.758621	0.912662
8048870	WD repeat domain 69	WDR69	0.877105	0.909619	0.824686	0.831707	0.786055	1.08424	0.866897	0.831527	0.782631
8009164	WD repeat domain 68	WDR68	1.76786	1.90276	1.5645	2.08757	1.60798	1.81582	2.10723	2.08617	1.95045
8148158	WD repeat domain 67	WDR67	0.668774	0.758258	0.773843	0.749831	0.926436	0.847031	0.764293	0.768718	0.764293
7959330	WD repeat domain 66	WDR66	0.984711	0.877709	1.21865	0.899316	0.892371	0.828404	0.970626	1.06034	0.976573
7900639	WD repeat domain 65	WDR65	0.832547	0.859127	0.828388	1.23078	0.927456	0.933953	1.18836	0.917947	0.846527
7910971	WD repeat domain 64	WDR64	0.761345	0.81558	0.902382	0.708976	0.895706	0.768196	0.676361	0.768196	0.865418
7902660	WD repeat domain 63	WDR63	0.865053	0.796979	0.881128	0.963784	0.841906	0.841906	1.01302	0.841906	0.841906
8028119	WD repeat domain 62	WDR62	1.34494	1.49334	1.32977	1.63582	1.52868	1.38233	1.52868	1.52868	1.47601
7990700	WD repeat domain 61	WDR61	1.05865	0.798913	0.914305	0.881272	0.903958	0.660551	0.697484	0.694997	0.855958
8137639	WD repeat domain 60	WDR60	1.02305	0.815495	1.16677	1.00982	0.890486	0.918701	1.12262	0.918701	0.848096
8079693	WD repeat domain 6	WDR6	1.4579	1.80332	1.79217	1.61547	1.40349	1.40349	1.39564	1.40349	1.45297
8089993	WD repeat domain 5B	WDR5B	0.710338	1.12109	0.795696	1.07289	0.678558	0.768197	0.619517	1.00887	0.721457
8002802	WD repeat domain 59	WDR59	1.07685	1.07685	1.07685	1.65451	0.869643	1.23711	0.908406	0.898241	1.07685
7914334	WD repeat domain 57 (U5 snRNP specific)	WDR57	1.26813	0.811185	0.978601	1.30776	1.24158	1.98418	1.4968	1.69876	1.73847
8108593	WD repeat domain 55	WDR55	1.64821	1.30497	1.23358	1.23358	1.23358	1.23358	0.98291	1.20073	1.22052
8042843	WD repeat domain 54	WDR54	0.953893	0.647902	1.15132	1.25848	1.0492	0.836492	1.33296	0.942119	0.975502
8093141	WD repeat domain 53	WDR53	0.995302	0.953746	0.840804	0.933558	0.997466	1.24734	1.03697	1.12311	1.07531
8089606	WD repeat domain 52	WDR52	0.80652	0.655965	0.718061	0.613914	0.633595	0.655965	0.801723	0.718061	0.73334
8089596	WD repeat domain 52	WDR52	0.877239	0.768014	1.15203	0.970718	0.861011	0.445488	1.01274	0.783722	1.02852
8087839	WD repeat domain 51A	WDR51A	0.675302	0.819369	0.962509	0.930421	0.930421	0.857098	0.98946	0.930421	0.930421
8159111	WD repeat domain 5	WDR5	1.67363	1.70617	1.48189	1.45427	1.30538	1.64821	1.55126	1.64821	1.95751
8091922	WD repeat domain 49	WDR49	0.773433	0.874054	0.952884	0.9136	0.709845	1.09382	0.842392	0.843073	0.841248
8078834	WD repeat domain 48	WDR48	0.916684	0.909081	1.11687	1.09666	0.916684	1.10082	0.858697	1.08236	0.915364
7918275	WD repeat domain 47	WDR47	0.907795	0.887698	1.08501	0.925502	1.01596	0.976191	1.02483	0.751244	0.940507
8125671	WD repeat domain 46	WDR46	1.18117	1.5573	1.29827	1.71955	0.983209	1.45065	1.56411	1.47247	1.51401
8178939	WD repeat domain 46	WDR46	1.18117	1.5573	1.29827	1.71955	0.983209	1.45065	1.56411	1.47247	1.51401
8019523	WDR45-like	WDR45L	1.84641	1.76801	1.16289	2.44207	1.95215	1.70707	1.82253	1.30399	2.38706
8172538	WD repeat domain 45	WDR45	1.46336	1.11349	1.03995	1.31657	1.30598	1.54038	1.48687	1.23255	1.76652
8169519	WD repeat domain 44	WDR44	0.575368	1.01399	0.745191	0.913254	0.785719	0.783827	0.749486	0.591218	0.845629
8041149	WD repeat domain 43	WDR43	0.791865	0.793564	1.04071	0.867321	0.806352	0.805229	0.864694	0.846893	0.784274
8171885	WD repeat domain 42B	WDR42B	0.870243	0.799608	0.869607	0.807471	1.10196	0.811052	0.816016	0.847757	0.838412
7921552	WD repeat domain 42A	WDR42A	0.943293	0.994654	0.945325	0.989279	1.24955	0.966563	1.03257	0.966563	1.03903
8112746	WD repeat domain 41	WDR41	1.1526	1.18906	0.984046	1.10397	1.29386	1.1182	1.11594	1.00022	1.23559
8174968	WD repeat domain 40C	WDR40C	0.859762	1.03289	1.11074	0.953666	0.919652	0.915116	0.967451	0.619443	0.707933
8174972	WD repeat domain 40B	WDR40B	1.14388	0.848342	1.21977	1.15433	1.14196	1.17412	1.23899	1.11428	1.48586
8160756	WD repeat domain 40A	WDR40A	1.44639	1.42172	1.48929	1.29899	1.46955	1.65784	1.18954	1.44721	2.20233
8070615	WD repeat domain 4	WDR4	1.28759	1.32322	1.41089	1.34363	1.39062	1.06627	1.31022	1.80512	2.00195
8157818	WD repeat domain 38	WDR38	1.44948	1.41179	1.4887	1.57136	1.62531	1.30638	1.36063	1.45936	1.57136
7925851	WD repeat domain 37	WDR37	1.32872	1.28339	1.17188	1.36598	1.15772	1.11764	1.246	1.13973	1.246
8107282	WD repeat domain 36	WDR36	0.830847	0.752838	1.06879	0.791876	0.795814	0.767726	0.652642	0.87307	0.981225
8050507	WD repeat domain 35	WDR35	0.785154	0.923727	0.831454	1.06703	0.732469	0.879301	1.11577	0.749687	0.834083
8164440	WD repeat domain 34	WDR34	1.89787	1.88458	1.72996	1.73245	1.88515	1.89787	2.01195	2.10115	2.23975
8055060	WD repeat domain 33	WDR33	0.762254	0.944978	0.978451	0.908702	0.839835	0.884714	0.884714	0.907439	0.857123
8155312	WD repeat domain 32	WDR32	1.06681	1.11334	1.09449	0.925134	1.09449	1.09449	1.1224	1.32038	1.3002
8163491	WD repeat domain 31	WDR31	1.12508	1.15205	1.17766	1.3263	0.942478	1.13901	1.10961	1.13345	1.0552
7904364	WD repeat domain 3	WDR3	0.756253	0.767624	0.735015	0.77284	0.711821	0.726511	0.735015	0.58095	0.735015
8130891	WD repeat domain 27	WDR27	1.0599	1.16699	1.33802	1.12345	1.12345	0.969553	1.03675	1.12345	1.04011
7924582	WD repeat domain 26	WDR26	0.889151	0.931853	0.832074	0.702526	0.969698	0.653473	0.912252	1.00252	1.10689
7976766	WD repeat domain 25	WDR25	1.16986	1.22657	1.15132	1.15132	1.05317	1.15132	1.66718	0.971136	1.08414
7998280	WD repeat domain 24	WDR24	1.41712	1.83843	1.83843	1.83843	1.83843	1.65902	2.22785	1.92108	1.75397
7973545	WD repeat domain 23	WDR23	1.04958	1.29166	1.20424	1.26816	1.56086	1.27216	0.923634	1.69924	1.56468
7979849	WD repeat domain 22	WDR22	1.94386	1.43913	1.17731	1.37396	1.42639	1.74728	1.29235	1.42959	2.15829
8151679	WD repeat domain 21C	WDR21C	1.11521	0.931496	1.31878	1.18795	1.10073	0.935737	1.34224	1.45924	1.10652
8094843	WD repeat domain 21B	WDR21B	1.20207	0.959025	0.982925	0.690351	1.09182	0.908422	0.96463	1.06852	0.986397
7975506	WD repeat domain 21A	WDR21A	1.11232	1.13593	1.18296	1.10053	1.09296	1.25639	1.24688	1.13236	1.11384
7976957	WD repeat domain 20	WDR20	0.946822	0.856323	0.925831	0.911037	1.07049	0.747405	0.734897	0.899261	0.899261
8094638	WD repeat domain 19	WDR19	0.991169	0.670423	0.908641	0.799486	0.724554	0.799486	0.799486	0.751437	0.821264
8024089	WD repeat domain 18	WDR18	2.33142	1.86109	2.17488	2.04224	2.32311	2.10093	2.25401	2.09242	3.03309
8098379	WD repeat domain 17	WDR17	0.736922	0.763105	0.702594	0.746885	0.678439	0.948064	0.795387	0.746885	0.599221
8004889	WD repeat domain 16	WDR16	0.828014	0.830607	0.781286	0.678141	0.833153	0.833153	0.927375	0.820974	0.837712
8167322	WD repeat domain 13	WDR13	2.34025	2.37799	1.56542	1.94619	2.13809	2.24194	1.90389	1.98591	2.02229
8058373	WD repeat domain 12	WDR12	0.972321	0.780102	0.886858	0.719071	0.803423	0.752734	0.752598	0.780102	0.694515
8099340	WD repeat domain 1	WDR1	2.00129	2.46104	2.13739	1.85123	2.22359	2.1348	2.13094	2.04521	2.6416
7979281	WD repeat and HMG-box DNA binding protein 1	WDHD1	0.747349	0.683183	0.663989	0.883319	0.739982	0.773063	0.899473	0.735015	0.634723
7927425	WDFY family member 4 /// chromosome 10 open reading frame 64	WDFY4 /// C10orf64	1.22052	1.22052	1.25164	1.2782	1.22052	1.22052	1.22052	1.30388	1.22052
8101511	WD repeat and FYVE domain containing 3	WDFY3	0.953138	1.00099	0.93862	0.995266	1.01423	0.922803	0.986355	0.922803	0.922803
7969204	WD repeat and FYVE domain containing 2	WDFY2	1.41685	1.56374	1.26007	1.32038	1.29507	1.32038	1.56251	1.22718	1.32038
8059361	WD repeat and FYVE domain containing 1	WDFY1	1.28896	1.38572	0.902272	1.07069	0.831614	1.04399	0.923023	0.993621	1.06491
8133366	Williams-Beuren syndrome chromosome region 28	WBSCR28	1.32244	1.07864	1.30451	1.08497	1.2695	1.33769	1.30451	1.07238	1.47187
8140144	Williams Beuren syndrome chromosome region 27	WBSCR27	1.83628	1.80717	1.87901	2.11598	1.83843	1.81331	1.80777	1.68088	1.8513
8133500	Williams-Beuren syndrome chromosome region 23	WBSCR23	1.07647	1.04147	0.995945	0.743573	0.901326	0.840696	1.24273	1.02743	1.05448
8133345	Williams Beuren syndrome chromosome region 22	WBSCR22	2.59027	3.07379	1.73776	1.62449	2.73144	2.30873	2.51814	2.56486	2.9724
8133654	Williams Beuren syndrome chromosome region 19 /// similar to Williams Beuren syndrome chromosome region 19 /// similar to Williams-Beuren syndrome critical region protein 19 /// Williams Beuren syndrome chromosome region 19 pseudogene /// Williams Beuren syndrome chromosome region 19 pseudogene /// similar to Williams Beuren syndrome chromosome region 19 /// similar to Williams Beuren syndrome ch…	WBSCR19 /// tcag7.1017 /// MGC119295 /// LOC441251 /// LOC389517 /// LOC442590 /// LOC100132581 /// LOC100134667 /// LOC730294	1.53241	1.47009	1.55472	1.5655	1.53241	1.50073	1.53241	1.65806	1.53241
8133209	Williams Beuren syndrome chromosome region 19 /// similar to Williams Beuren syndrome chromosome region 19 /// Williams Beuren syndrome chromosome region 19 pseudogene /// Williams Beuren syndrome chromosome region 19 pseudogene /// similar to Williams Beuren syndrome chromosome region 19 /// similar to Williams Beuren syndrome chromosome region 19 pseudogene /// similar to Williams Beuren syndro…	WBSCR19 /// tcag7.1017 /// LOC441251 /// LOC389517 /// LOC442590 /// LOC100132581 /// LOC100134667 /// LOC730294	1.57823	1.23638	1.80476	1.66193	1.23611	1.37529	1.57068	1.49043	1.50571
8140424	Williams Beuren syndrome chromosome region 19 /// similar to Williams Beuren syndrome chromosome region 19 /// Williams Beuren syndrome chromosome region 19 pseudogene /// Williams Beuren syndrome chromosome region 19 pseudogene /// similar to Williams Beuren syndrome chromosome region 19 /// similar to Williams Beuren syndrome chromosome region 19 pseudogene /// similar to Williams Beuren syndro…	WBSCR19 /// tcag7.1017 /// LOC441251 /// LOC389517 /// LOC442590 /// LOC100132581 /// LOC100134667 /// LOC730294	1.51607	1.26866	1.51607	1.57405	1.51607	1.58907	1.44579	1.62369	1.5315
8140454	Williams Beuren syndrome chromosome region 19 /// similar to Williams Beuren syndrome chromosome region 19 /// Williams Beuren syndrome chromosome region 19 pseudogene /// Williams Beuren syndrome chromosome region 19 pseudogene /// similar to Williams Beuren syndrome chromosome region 19 /// similar to Williams Beuren syndrome chromosome region 19 pseudogene /// similar to Williams Beuren syndro…	WBSCR19 /// tcag7.1017 /// LOC441251 /// LOC389517 /// LOC442590 /// LOC100132581 /// LOC100134667 /// LOC730294	1.55155	1.30305	1.57923	1.63422	1.58266	1.65223	1.60138	1.71248	1.57923
8135204	Williams Beuren syndrome chromosome region 19 /// Williams Beuren syndrome chromosome region 19 pseudogene /// similar to Williams Beuren syndrome chromosome region 19 /// similar to Williams-Beuren syndrome critical region protein 19 /// Williams Beuren syndrome chromosome region 19 pseudogene /// similar to Williams Beuren syndrome chromosome region 19 /// similar to Williams Beuren syndrome ch…	WBSCR19 /// LOC389517 /// tcag7.1017 /// MGC119295 /// LOC441251 /// LOC442590 /// LOC100132581 /// LOC100134667 /// LOC730294	1.43144	1.20312	1.50265	1.43607	1.38172	1.38188	1.24239	1.41038	1.38188
8141750	Williams Beuren syndrome chromosome region 19 /// Williams Beuren syndrome chromosome region 19 pseudogene /// similar to Williams Beuren syndrome chromosome region 19 /// similar to Williams-Beuren syndrome critical region protein 19 /// Williams Beuren syndrome chromosome region 19 pseudogene /// similar to Williams Beuren syndrome chromosome region 19 /// similar to Williams Beuren syndrome ch…	WBSCR19 /// LOC389517 /// tcag7.1017 /// MGC119295 /// LOC441251 /// LOC442590 /// LOC100132581 /// LOC100134667 /// LOC730294	1.0599	0.774286	1.19616	1.10884	1.05735	1.05746	1.08773	1.03519	1.0599
8135197	Williams Beuren syndrome chromosome region 19 /// Williams Beuren syndrome chromosome region 19 pseudogene /// similar to Williams Beuren syndrome chromosome region 19 /// similar to Williams-Beuren syndrome critical region protein 19 /// Williams Beuren syndrome chromosome region 19 pseudogene /// similar to Williams Beuren syndrome chromosome region 19 /// similar to Williams Beuren syndrome ch…	WBSCR19 /// LOC389517 /// tcag7.1017 /// MGC119295 /// LOC441251 /// LOC442590 /// LOC100132581 /// LOC100134667 /// LOC730294	1.14252	0.939256	1.23255	1.18297	1.1132	1.1132	1.0756	1.0885	1.1132
8132531	Williams Beuren syndrome chromosome region 19 /// Williams Beuren syndrome chromosome region 19 pseudogene /// similar to Williams Beuren syndrome chromosome region 19 /// similar to Williams-Beuren syndrome critical region protein 19 /// Williams Beuren syndrome chromosome region 19 pseudogene /// similar to Williams Beuren syndrome chromosome region 19 /// similar to Williams Beuren syndrome ch…	WBSCR19 /// LOC389517 /// tcag7.1017 /// MGC119295 /// LOC441251 /// LOC442590 /// LOC100132581 /// LOC100134667 /// LOC730294	1.35077	1.1442	1.29696	1.46015	1.27719	1.17151	1.30883	1.23777	1.29696
8139996	Williams Beuren syndrome chromosome region 19 /// Williams Beuren syndrome chromosome region 19 pseudogene /// similar to Williams Beuren syndrome chromosome region 19 /// similar to Williams Beuren syndrome chromosome region 19 /// similar to Williams Beuren syndrome chromosome region 19 pseudogene /// similar to Williams Beuren syndrome chromosome region 19 pseudogene /// similar to similar to …	WBSCR19 /// LOC389517 /// tcag7.1017 /// LOC442590 /// LOC100132581 /// LOC100134667 /// LOC730294	1.15132	1.15132	1.15387	1.19945	1.03532	1.15132	1.05487	0.98247	1.15132
8140107	Williams Beuren syndrome chromosome region 18	WBSCR18	2.11189	2.72316	2.4339	2.15408	2.39783	2.59695	2.09734	2.88117	2.62031
8133258	Williams-Beuren syndrome chromosome region 17	WBSCR17	1.02987	0.907997	0.993824	0.943293	0.854834	0.943293	0.943293	1.14129	0.792417
8140220	Williams-Beuren syndrome chromosome region 16	WBSCR16	2.62156	3.05919	2.56171	2.29602	3.39354	2.47766	2.81597	2.79052	2.59381
8169022	WW domain binding protein 5	WBP5	0.8074	0.976438	0.739583	0.816749	0.668492	0.93943	0.970483	0.678389	0.958053
7968746	WW domain binding protein 4 (formin binding protein 21)	WBP4	0.753502	0.950284	0.786549	0.746664	0.824888	0.806093	0.758354	0.884552	0.700472
8073562	WBP2 N-terminal like	WBP2NL	0.709071	0.997907	0.863525	0.988145	0.699369	1.31522	1.01048	1.17462	0.851564
8018482	WW domain binding protein 2	WBP2	2.26295	2.0737	1.54992	1.47659	1.72026	1.36145	1.63447	1.71746	1.81897
8020842	WW domain binding protein 11 pseudogene 1	WBP11P1	0.943135	1.1514	1.20751	1.71587	1.32997	1.17861	1.2409	1.23439	1.03348
7961489	WW domain binding protein 11	WBP11	0.962619	0.890715	0.84994	0.890715	0.890715	1.19731	0.890715	0.747897	1.10306
8053599	WW domain binding protein 1	WBP1	5.82418	6.03566	5.14436	4.79319	5.37491	5.42897	5.10412	5.0496	5.57264
8043377	WW domain binding protein 1	WBP1	5.93286	6.1491	5.04739	4.73948	5.4648	5.51886	5.16382	5.18196	5.64511
8042867	WW domain binding protein 1	WBP1	5.67502	5.92831	5.10568	4.61452	5.34494	5.3722	4.98077	4.99037	5.47305
8142671	Wiskott-Aldrich syndrome-like	WASL	1.17991	1.34644	1.08967	1.15054	1.0814	1.16049	1.26675	1.09422	1.15054
8171066	WAS protein family homolog 6 pseudogene /// WAS protein family homolog 3 pseudogene /// CXYorf1-related protein /// WAS protein family homolog 2 pseudogene /// WAS protein family homolog 1	WASH6P /// WASH3P /// LOC376475 /// WASH2P /// WASH1	2.26328	2.25695	2.10675	2.26328	2.26328	2.1508	2.32205	2.15515	2.40765
7998119	WAS protein family homolog 6 pseudogene /// WAS protein family homolog 3 pseudogene /// CXYorf1-related protein /// WAS protein family homolog 2 pseudogene /// WAS protein family homolog 1	WASH6P /// WASH3P /// LOC376475 /// WASH2P /// WASH1	3.17051	3.08002	2.82933	3.08531	3.04798	3.06185	3.08531	3.08531	3.19862
8159790	WAS protein family homolog 3 pseudogene /// WAS protein family homolog 6 pseudogene /// CXYorf1-related protein /// WAS protein family homolog 2 pseudogene /// WAS protein family homolog 1	WASH3P /// WASH6P /// LOC376475 /// WASH2P /// WASH1	2.93428	2.9387	2.72084	2.9387	2.8555	2.71883	2.99019	2.96226	3.10425
7911309	WAS protein family homolog 3 pseudogene /// WAS protein family homolog 6 pseudogene /// CXYorf1-related protein /// WAS protein family homolog 1 /// WAS protein family homolog 2 pseudogene	WASH3P /// WASH6P /// LOC376475 /// WASH1 /// WASH2P	2.1821	2.1963	2.05025	2.16	2.17518	2.05126	2.2535	2.17064	2.34764
7986541	WAS protein family homolog 3 pseudogene /// WAS protein family homolog 6 pseudogene /// CXYorf1-related protein /// WAS protein family homolog 1 /// WAS protein family homolog 2 pseudogene	WASH3P /// WASH6P /// LOC376475 /// WASH1 /// WASH2P	2.05444	2.10255	1.93935	2.10255	2.10255	1.9617	2.10255	2.07581	2.22015
8044649	WAS protein family homolog 3 pseudogene /// WAS protein family homolog 6 pseudogene /// CXYorf1-related protein /// WAS protein family homolog 1 /// WAS protein family homolog 2 pseudogene	WASH3P /// WASH6P /// LOC376475 /// WASH1 /// WASH2P	2.23902	2.23902	2.03327	2.23902	2.23902	2.17527	2.23902	2.23902	2.51491
8031981	WAS protein family homolog 1	WASH1	1.74404	1.54124	1.53508	1.1775	1.28665	1.14125	1.34414	1.26618	1.36466
8167198	WAS protein family, member 4	WASF4	1.10958	0.929391	1.27163	1.0732	1.12512	1.15132	1.11272	1.14695	0.886208
7968212	WAS protein family, member 3	WASF3	1.45691	1.35205	1.31176	1.42974	1.30514	1.34455	1.22684	1.26047	1.30514
7914094	WAS protein family, member 2	WASF2	1.43841	1.38935	0.857751	1.21405	1.25182	1.10489	1.44832	1.2126	1.34908
8128818	WAS protein family, member 1	WASF1	0.971471	0.943293	0.943293	0.98626	0.982102	0.796374	0.796374	0.922803	0.920548
8167334	Wiskott-Aldrich syndrome (eczema-thrombocytopenia)	WAS	1.26787	1.37136	1.42095	1.42409	1.24022	1.15682	1.26787	1.34877	1.1736
7919038	tryptophanyl tRNA synthetase 2, mitochondrial	WARS2	1.30709	0.978636	1.03456	0.862145	0.796442	0.943151	1.09896	0.850148	0.99607
7981290	tryptophanyl-tRNA synthetase	WARS	1.25542	1.46219	1.32294	1.45553	1.25359	1.26929	1.47101	1.4307	1.51984
7934812	wings apart-like homolog (Drosophila)	WAPAL	0.841571	0.719135	1.03925	0.942815	0.943134	0.927441	0.867009	0.913705	0.745781
7926851	WW domain containing adaptor with coiled-coil	WAC	0.834479	1.34282	0.968841	1.02836	0.860514	1.1201	0.861574	0.847805	1.07077
7960464	von Willebrand factor	VWF	0.92263	0.92263	0.806081	0.86341	0.92263	0.92263	0.92263	0.834954	0.92263
7948511	von Willebrand factor C and EGF domains	VWCE	1.47233	1.47233	1.50442	1.76262	1.29698	1.47233	1.37942	1.47233	1.47233
8132805	von Willebrand factor C domain containing 2	VWC2	3.27185	3.4249	3.2622	3.40247	3.14894	3.21736	3.27637	3.15827	3.24602
8043747	von Willebrand factor A domain containing 3B	VWA3B	0.756253	0.686679	0.921836	0.833216	0.765164	0.845497	0.765164	0.834354	0.697978
7993898	von Willebrand factor A domain containing 3A	VWA3A	0.980346	0.819632	0.980346	0.980346	0.980346	0.996477	0.980346	0.980346	1.0685
7930663	von Willebrand factor A domain containing 2	VWA2	1.32711	1.33208	1.29698	1.43675	1.18375	1.32806	1.39229	1.53159	1.26667
7896929	von Willebrand factor A domain containing 1	VWA1	2.25695	2.4301	2.51692	2.44514	2.44514	2.44514	2.40009	2.28598	2.55599
8013606	vitronectin	VTN	1.71551	1.29037	1.46671	1.25667	1.29869	1.09353	1.30133	1.29037	1.29037
7979732	vesicle transport through interaction with t-SNAREs homolog 1B (yeast)	VTI1B	0.906659	0.959962	0.592039	0.946324	0.827823	0.949396	1.00172	0.910111	0.801822
7930524	vesicle transport through interaction with t-SNAREs homolog 1A (yeast)	VTI1A	0.998619	1.14553	0.941326	0.855024	0.908524	0.845606	0.824066	0.764443	0.840012
7918936	V-set domain containing T cell activation inhibitor 1	VTCN1	1.01224	0.920202	0.994683	1.32099	1.02414	1.09568	1.08167	1.19241	1.15254
8122348	Vps20-associated 1 homolog (S. cerevisiae)	VTA1	0.703417	0.871618	0.773227	0.773227	0.706956	0.701827	0.773227	0.719589	0.773227
7975696	visual system homeobox 2	VSX2	1.39113	1.48868	1.61387	1.69281	1.95555	1.77967	1.61724	1.6441	1.53679
8065460	visual system homeobox 1	VSX1	1.33945	1.3924	1.4436	1.77335	1.4436	1.26481	1.34257	1.47169	1.40821
8081799	V-set and transmembrane domain containing 3	VSTM3	0.929688	0.880866	0.969671	0.82396	0.739661	0.955053	1.06138	0.771241	0.680798
8062427	V-set and transmembrane domain containing 2 like	VSTM2L	2.03735	2.19165	1.98477	1.86699	1.90875	2.12311	1.98477	1.8492	2.10295
8027385	V-set and transmembrane domain containing 2B	VSTM2B	2.70578	2.87573	3.05592	2.44496	2.87573	2.87573	2.52934	2.68433	2.87573
8132851	V-set and transmembrane domain containing 2A	VSTM2A	0.953308	1.04786	0.915116	0.813883	0.915116	0.915116	0.840979	0.915116	0.915116
8039109	V-set and transmembrane domain containing 1	VSTM1	0.956384	0.871889	0.890247	0.85178	0.956384	0.934953	1.03157	0.982965	0.956384
8040430	visinin-like 1	VSNL1	0.712176	0.7707	0.763605	0.75242	0.93068	0.808242	0.837206	0.806995	0.757955
8173287	V-set and immunoglobulin domain containing 4	VSIG4	1.04428	0.920005	1.07466	1.04114	1.03823	0.978077	1.14273	1.12938	1.05253
7952426	V-set and immunoglobulin domain containing 2	VSIG2	1.14812	1.02832	1.56732	1.32117	1.45675	0.988334	1.16818	1.14577	1.49212
8169263	V-set and immunoglobulin domain containing 1	VSIG1	1.05516	0.851564	0.964958	0.908627	0.758372	0.768196	1.07653	0.776324	0.713317
8038515	vaccinia related kinase 3	VRK3	2.14962	1.99228	1.96916	1.81514	1.70437	1.99691	2.03455	1.95702	1.97676
8042086	vaccinia related kinase 2	VRK2	0.780419	0.793884	0.866102	0.911252	0.730507	0.894597	0.77549	0.865444	0.784975
7976621	vaccinia related kinase 1	VRK1	0.782331	0.795547	0.752289	0.922226	0.813195	0.940822	0.885476	0.737798	0.818318
8084541	vacuolar protein sorting 8 homolog (S. cerevisiae)	VPS8	0.855262	0.994782	0.980383	0.952859	1.01907	0.856841	0.93055	0.921274	0.867206
7919940	vacuolar protein sorting 72 homolog (S. cerevisiae)	VPS72	2.00616	1.95709	1.71148	1.89787	1.97206	1.30277	1.99808	1.89787	2.16199
8052626	vacuolar protein sorting 54 homolog (S. cerevisiae)	VPS54	0.890715	0.734737	0.807054	0.975468	0.876025	0.850881	0.890715	0.753906	0.890715
8010924	vacuolar protein sorting 53 homolog (S. cerevisiae)	VPS53	1.02714	1.12566	1.0451	1.02714	0.888818	0.881071	1.04291	1.02714	1.06424
8010918	vacuolar protein sorting 53 homolog (S. cerevisiae)	VPS53	1.9612	2.13155	1.82514	1.96948	1.51546	1.74985	1.74985	1.56126	1.71738
8125649	vacuolar protein sorting 52 homolog (S. cerevisiae)	VPS52	0.94626	0.922632	1.35131	0.844682	0.992529	1.1054	1.0593	1.2045	1.27841
8178917	vacuolar protein sorting 52 homolog (S. cerevisiae)	VPS52	0.94626	0.922632	1.35131	0.844682	0.992529	1.1054	1.0593	1.2045	1.27841
8180123	vacuolar protein sorting 52 homolog (S. cerevisiae)	VPS52	0.994485	0.913225	1.33042	0.892908	1.03003	1.12898	1.04796	1.23294	1.26199
8023672	vacuolar protein sorting 4 homolog B (S. cerevisiae)	VPS4B	0.869773	0.901518	0.79238	0.917797	0.889177	0.828618	0.975562	0.946855	0.948425
7996919	vacuolar protein sorting 4 homolog A (S. cerevisiae)	VPS4A	1.60264	1.41522	1.58924	1.23358	1.57442	1.40539	1.93892	2.34093	2.05566
7905099	vacuolar protein sorting 45 homolog (S. cerevisiae)	VPS45	0.808031	0.952654	0.808031	0.874682	0.834461	0.777508	0.808031	0.883308	0.851611
8139165	vacuolar protein sorting 41 homolog (S. cerevisiae)	VPS41	0.922803	0.929655	0.9908	0.87686	0.856706	0.892714	0.915116	0.739551	0.922803
7987840	vacuolar protein sorting 39 homolog (S. cerevisiae)	VPS39	1.2837	1.23368	1.12379	1.10757	1.11639	1.43298	1.27308	1.27611	1.15559
8133339	vacuolar protein sorting 37 homolog D (S. cerevisiae)	VPS37D	2.74238	3.17064	3.11762	3.11762	3.11762	3.43607	2.88954	3.00701	3.32418
7948504	vacuolar protein sorting 37 homolog C (S. cerevisiae)	VPS37C	2.1414	2.14394	2.15281	2.18649	1.93485	1.94461	1.92748	1.91343	2.0964
7967331	vacuolar protein sorting 37 homolog B (S. cerevisiae)	VPS37B	1.7228	1.56389	1.62443	1.28963	1.63488	1.56334	1.68461	1.71578	2.30321
8144774	vacuolar protein sorting 37 homolog A (S. cerevisiae)	VPS37A	1.42603	1.56347	1.86841	1.71696	1.72003	1.70919	1.74312	1.71241	1.45771
7971820	vacuolar protein sorting 36 homolog (S. cerevisiae)	VPS36	0.94971	0.932771	0.932771	0.952145	0.966227	0.932771	0.928722	0.818913	0.932771
8001149	vacuolar protein sorting 35 homolog (S. cerevisiae)	VPS35	0.661442	1.00974	0.913956	0.965852	1.04434	0.906759	0.857101	0.799644	0.972028
7991427	vacuolar protein sorting 33 homolog B (yeast)	VPS33B	1.33603	1.12973	1.3262	1.12973	0.929389	1.22208	1.04101	1.18484	1.29001
7967240	vacuolar protein sorting 33 homolog A (S. cerevisiae)	VPS33A	0.988235	0.92392	0.857532	0.763268	0.802609	0.673001	0.774469	0.715071	0.75391
7966332	vacuolar protein sorting 29 homolog (S. cerevisiae)	VPS29	0.988225	0.807242	0.873717	0.888379	1.05563	0.873154	0.895252	0.914304	0.873717
8153776	vacuolar protein sorting 28 homolog (S. cerevisiae)	VPS28	3.78569	3.75088	3.14338	2.27628	2.71427	3.07134	3.32721	2.78134	3.65631
7945275	vacuolar protein sorting 26 homolog B (S. pombe)	VPS26B	1.56189	1.49634	1.3924	1.29263	1.08148	1.34057	1.31586	1.3924	1.57963
7927972	vacuolar protein sorting 26 homolog A (S. pombe)	VPS26A	0.883143	0.847266	0.905451	0.776326	0.605295	0.847266	0.751943	0.662607	0.728432
8007355	vacuolar protein sorting 25 homolog (S. cerevisiae)	VPS25	1.93947	1.79328	1.82493	1.67052	1.67052	1.56136	2.0516	1.67052	1.60507
8053562	vacuolar protein sorting 24 homolog (S. cerevisiae)	VPS24	1.45373	1.57476	1.34494	1.31748	1.49818	1.43278	1.70045	1.43156	1.47496
7982845	vacuolar protein sorting 18 homolog (S. cerevisiae)	VPS18	1.27105	1.2394	1.53896	1.18297	1.26646	1.18297	1.36994	1.18297	1.20365
7897890	vacuolar protein sorting 13 homolog D (S. cerevisiae)	VPS13D	0.89089	0.994654	0.784711	0.945818	0.788332	0.941064	0.952799	0.800453	0.756924
7989387	vacuolar protein sorting 13 homolog C (S. cerevisiae)	VPS13C	0.82841	0.808309	0.808309	0.80244	0.813138	0.88076	0.808309	0.808309	0.803374
8147580	vacuolar protein sorting 13 homolog B (yeast)	VPS13B	0.896196	1.04007	0.830945	0.860228	0.844078	0.830945	0.830945	0.813553	0.852078
8155946	vacuolar protein sorting 13 homolog A (S. cerevisiae)	VPS13A	0.818153	0.763105	0.763105	0.754254	0.763105	0.796287	0.763105	0.743805	0.818153
7944382	vacuolar protein sorting 11 homolog (S. cerevisiae)	VPS11	1.02485	1.24588	1.02485	0.805308	1.01213	1.02485	1.11167	0.922803	1.30675
8074934	pre-B lymphocyte gene 3	VPREB3	1.0497	1.0497	1.19155	1.23358	0.998478	1.1365	0.952341	0.862085	1.03664
8071646	pre-B lymphocyte gene 1	VPREB1	0.874711	0.931102	0.906612	0.899686	0.851564	0.851564	0.914786	0.914786	0.834234
8087748	Vpr (HIV-1) binding protein	VPRBP	0.983327	1.1661	0.973002	0.751366	1.12166	1.07041	0.900263	0.919656	0.917757
8129627	vanin 3	VNN3	0.771196	1.13303	0.818405	1.19999	0.775228	0.633536	0.785737	0.918122	0.986448
8129637	vanin 2	VNN2	0.866378	0.927871	0.836609	0.918407	0.741136	0.856719	0.929929	0.91266	0.856719
8129618	vanin 1	VNN1	1.04083	0.637402	0.817007	0.841537	0.774589	0.892693	0.721049	0.929641	0.910474
8083538	vomeronasal 2 receptor 1 pseudogene	VN2R1P	0.829731	0.57351	0.857368	0.682267	0.978754	0.85815	0.734695	0.828304	0.808387
7911174	vomeronasal 1 receptor 5	VN1R5	0.821307	0.657086	0.816784	1.02634	0.783469	0.887235	0.753761	0.895362	0.65596
8039075	vomeronasal 1 receptor 4	VN1R4	0.570197	0.881773	0.868244	0.687927	0.69951	0.601038	0.706464	0.760062	0.421866
8001064	vomeronasal 1 receptor 3	VN1R3	0.995121	0.687322	0.814932	0.899686	0.695652	0.837421	0.854767	0.814932	0.820024
8030972	vomeronasal 1 receptor 2	VN1R2	0.668836	0.756612	0.775028	0.80431	0.62595	1.21386	0.91675	0.809605	0.784314
8039642	vomeronasal 1 receptor 1	VN1R1	0.808031	0.991907	0.839161	0.815224	0.924581	0.808031	1.01926	0.719204	0.707739
8011724	vitelline membrane outer layer 1 homolog (chicken)	VMO1	0.984295	1.14709	1.32744	1.18875	0.855494	1.08966	1.12117	1.12598	1.06669
8025000	vimentin-type IF-associated coiled-coil protein	VMAC	1.31774	1.31774	1.43251	1.50957	1.02542	1.1361	1.2676	1.47665	1.31774
8154100	very low density lipoprotein receptor	VLDLR	0.854861	0.787712	0.914324	0.772465	0.854508	0.987334	0.912173	0.854508	0.854508
8133114	vitamin K epoxide reductase complex, subunit 1-like 1	VKORC1L1	1.33101	1.22397	1.09791	0.958784	1.03538	1.06225	1.05283	1.0725	1.69389
8133119	vitamin K epoxide reductase complex, subunit 1-like 1	VKORC1L1	1.10012	0.86963	1.25318	1.05933	0.905244	0.8972	0.924066	0.941764	0.946455
8000998	vitamin K epoxide reductase complex, subunit 1	VKORC1	2.68376	3.39764	2.28447	2.38701	2.43241	2.7849	3.46618	2.93585	3.37694
8041467	vitrin	VIT	0.851564	0.851564	0.756859	0.935342	0.910784	0.985038	0.793008	0.851564	0.850438
8060705	virus-induced signaling adapter	VISA	3.00794	3.83226	3.44195	2.32598	1.87735	2.19687	1.93725	2.25445	2.1751
8144213	vasoactive intestinal peptide receptor 2	VIPR2	0.82042	0.787931	0.981959	1.11389	1.06048	0.837405	1.10777	0.915732	0.850375
8079060	vasoactive intestinal peptide receptor 1	VIPR1	1.16419	1.33424	1.20368	1.36133	1.38789	1.32146	1.46007	1.56201	1.54788
8122865	vasoactive intestinal peptide	VIP	0.831454	0.808084	0.735042	1.09631	0.831454	0.831454	0.913891	0.867266	0.856719
7926368	vimentin	VIM	1.59781	1.63185	1.28802	1.53851	1.693	1.43901	1.58372	1.42029	1.78409
8078665	villin-like	VILL	1.58182	1.39721	1.58589	1.87844	1.53241	1.58188	1.34567	1.52731	1.67011
8048319	villin 1	VIL1	0.89656	0.757341	1.02721	0.987991	0.987991	0.987991	1.02782	0.972711	0.987991
7920980	von Hippel-Lindau tumor suppressor-like	VHLL	0.791519	0.599876	0.948187	0.796479	0.698213	0.762659	0.713818	0.808187	0.777761
8077781	von Hippel-Lindau tumor suppressor	VHL	1.15071	0.861079	0.982574	0.823099	0.978681	0.722139	0.992528	1.17527	0.966807
8085340	vestigial like 4 (Drosophila)	VGLL4	1.22517	1.78414	1.2463	1.70921	1.54258	1.49862	1.38919	1.35815	1.40006
8088979	vestigial like 3 (Drosophila)	VGLL3	1.22717	0.98877	1.15653	0.740376	1.0607	0.965198	1.00829	0.933444	1.27828
8121672	vestigial like 2 (Drosophila)	VGLL2	1.03831	1.17028	1.12935	1.27722	1.03393	1.15199	1.3205	1.2595	1.1446
8170179	vestigial like 1 (Drosophila)	VGLL1	1.0599	1.54088	1.5443	1.0991	1.55455	1.38536	2.13458	1.39864	1.17733
8141664	VGF nerve growth factor inducible	VGF	2.13943	2.20934	2.12924	2.12924	2.23913	2.01984	2.19154	2.00234	2.12924
7957613	vezatin, adherens junctions transmembrane protein	VEZT	0.873579	0.885858	0.873579	0.885666	1.0455	0.770127	0.861405	0.873579	0.873579
8016891	vascular endothelial zinc finger 1	VEZF1	0.851564	0.878586	1.05238	1.42163	0.830801	0.941323	0.775782	1.05238	1.05238
8091678	ventricular zone expressed PH domain homolog 1 (zebrafish)	VEPH1	1.04124	0.851707	1.08557	0.945857	0.657116	0.933799	0.624893	0.914222	0.85443
7931556	VENT homeobox homolog (Xenopus laevis)	VENTX	1.62173	1.91139	1.73037	1.73	1.60464	2.03427	1.76734	1.75639	1.63097
8103822	vascular endothelial growth factor C	VEGFC	1.68111	1.85635	1.76951	1.67124	1.75156	2.10956	2.41186	1.81741	2.01546
7940904	vascular endothelial growth factor B	VEGFB	4.15674	4.78289	3.50873	3.0796	2.74978	2.31536	3.35742	3.16291	3.91624
8119898	vascular endothelial growth factor A	VEGFA	1.89335	2.03634	1.58188	1.89865	1.36797	2.04316	1.90794	1.62813	2.41949
7962689	vitamin D (1,25- dihydroxyvitamin D3) receptor	VDR	0.889218	1.41679	1.17898	0.989449	1.58193	1.04918	1.01229	1.12729	1.02535
8146216	voltage-dependent anion channel 3	VDAC3	1.13906	0.858856	0.889275	1.18713	0.922611	0.670076	0.889509	0.65218	1.12285
7928524	voltage-dependent anion channel 2	VDAC2	1.1981	1.04461	1.12072	1.2338	1.33367	1.24691	1.1981	1.18282	1.03378
8042335	voltage-dependent anion channel 2	VDAC2	1.52142	1.5123	1.5123	1.38637	1.59732	1.7874	1.27466	1.2471	1.48571
8114145	voltage-dependent anion channel 1	VDAC1	1.20932	1.35373	1.68969	1.58285	1.27733	1.3125	1.22733	1.30122	1.85114
8176650	variable charge, Y-linked /// variable charge, Y-linked 1B /// variable charge, X-linked 3A	VCY /// VCY1B /// VCX3A	2.20151	2.47184	2.09856	2.37954	2.39381	2.51883	2.14085	2.60136	2.37976
8177169	variable charge, Y-linked /// variable charge, Y-linked 1B /// variable charge, X-linked 3A	VCY /// VCY1B /// VCX3A	2.20151	2.47184	2.09856	2.37954	2.39381	2.51883	2.14085	2.60136	2.37976
8165890	variable charge, Y-linked /// variable charge, X-linked 3A /// variable charge, X-linked 2 /// variable charge, X-linked 3B /// variable charge, X-linked /// variable charge, Y-linked 1B	VCY /// VCX3A /// VCX2 /// VCX3B /// VCX /// VCY1B	2.33891	2.37081	2.03692	2.03692	2.03692	2.26329	1.94727	2.13976	2.10255
8171216	variable charge, Y-linked /// variable charge, X-linked 3A /// variable charge, X-linked 2 /// variable charge, X-linked /// variable charge, X-linked 3B /// variable charge, Y-linked 1B	VCY /// VCX3A /// VCX2 /// VCX /// VCX3B /// VCY1B	1.90504	2.1507	1.90946	1.90504	1.88592	2.04365	1.84981	2.06099	1.90504
8165881	variable charge, X-linked 3A /// variable charge, X-linked 2 /// variable charge, X-linked 3B /// variable charge, X-linked /// variable charge, Y-linked /// variable charge, Y-linked 1B	VCX3A /// VCX2 /// VCX3B /// VCX /// VCY /// VCY1B	2.26041	2.42696	2.24033	2.21333	2.24033	2.43685	2.14198	2.40096	2.56466
8171240	variable charge, X-linked 2 /// variable charge, X-linked 3A /// variable charge, Y-linked	VCX2 /// VCX3A /// VCY	1.779	1.94312	1.80602	1.53808	1.80046	1.94428	1.73418	1.83929	1.99389
8151118	valosin containing protein (p97)/p47 complex interacting protein 1	VCPIP1	1.11159	1.11516	1.15726	1.0441	1.07619	1.20349	1.2263	1.3219	1.12889
8160914	valosin-containing protein	VCP	1.59451	1.77878	1.49082	1.24987	1.60856	1.70937	1.44194	1.56483	2.01312
7928444	vinculin	VCL	0.979892	0.866587	0.861191	0.936284	1.10827	1.18024	0.979892	0.987794	0.979892
8106743	versican	VCAN	1.18647	0.806346	0.689796	1.23095	0.922895	0.845497	0.915116	0.787046	0.722978
7903358	vascular cell adhesion molecule 1	VCAM1	1.45094	1.2858	1.11212	1.02519	1.06286	1.66793	1.00542	1.01627	1.41149
8171013	von Hippel-Lindau binding protein 1	VBP1	1.01647	0.714205	0.726911	0.718061	0.715043	0.718061	0.718061	0.581251	0.852646
8042532	ventral anterior homeobox 2	VAX2	1.967	1.9258	1.82105	1.97347	1.9902	1.80337	2.13333	1.81837	1.77864
7936552	ventral anterior homeobox 1	VAX1	1.09733	1.09781	1.07974	0.888621	1.15882	1.03384	1.09985	1.01961	1.23333
7918157	vav 3 guanine nucleotide exchange factor	VAV3	0.864856	0.801106	0.819084	0.816418	0.725104	0.978858	0.86343	0.932217	0.806737
8164967	vav 2 guanine nucleotide exchange factor	VAV2	1.28407	1.13951	1.16219	1.21964	1.17732	1.14323	1.08852	1.17623	1.1858
8025076	vav 1 guanine nucleotide exchange factor	VAV1	0.862732	0.922803	0.994042	0.91614	1.03935	1.17623	0.74401	0.922803	0.922803
8015759	vesicle amine transport protein 1 homolog (T. californica)	VAT1	3.9155	4.41735	3.44903	3.43372	3.30749	3.2459	3.73425	3.85281	4.63605
8029710	vasodilator-stimulated phosphoprotein	VASP	2.02426	1.99009	2.02337	1.92889	2.00944	1.88349	1.87245	2.02337	1.93252
7992967	vasorin	VASN	1.95237	1.63988	1.7229	1.87027	1.60909	1.50165	1.75422	1.53495	2.02191
7909642	vasohibin 2	VASH2	1.22052	1.30039	1.22052	1.36982	1.18226	1.31622	1.22052	1.22052	1.22052
7975889	vasohibin 1	VASH1	1.73573	2.15592	1.63238	1.97798	1.35591	1.6335	2.18034	1.76843	1.84553
8118007	valyl-tRNA synthetase 2, mitochondrial (putative) /// general transcription factor IIH, polypeptide 4, 52kDa	VARS2 /// GTF2H4	1.32038	1.29405	1.2779	1.29914	1.3756	1.32428	1.56919	1.21881	1.29914
8177885	valyl-tRNA synthetase 2, mitochondrial (putative) /// general transcription factor IIH, polypeptide 4, 52kDa	VARS2 /// GTF2H4	1.32038	1.29405	1.2779	1.29914	1.3756	1.32428	1.56919	1.21881	1.29914
8179205	valyl-tRNA synthetase 2, mitochondrial (putative) /// general transcription factor IIH, polypeptide 4, 52kDa	VARS2 /// GTF2H4	1.32038	1.29405	1.2779	1.29914	1.3756	1.32428	1.56919	1.21881	1.29914
8118023	valyl-tRNA synthetase 2, mitochondrial (putative) /// general transcription factor IIH, polypeptide 4, 52kDa	VARS2 /// GTF2H4	1.35635	1.23414	1.59247	1.75495	1.7466	1.25095	1.95121	1.57503	1.52739
8177901	valyl-tRNA synthetase 2, mitochondrial (putative)	VARS2	1.20112	1.04734	1.34632	1.50873	1.21826	1.24766	1.21826	1.28434	1.21826
8118028	valyl-tRNA synthetase 2, mitochondrial (putative)	VARS2	1.23671	1.07724	1.43224	1.59143	1.27988	1.28986	1.27988	1.34596	1.27988
8125091	valyl-tRNA synthetase	VARS	1.55769	1.3657	1.78459	1.43374	1.73648	1.45802	1.58947	1.79704	1.51709
8178609	valyl-tRNA synthetase	VARS	1.55769	1.3657	1.78459	1.43374	1.73648	1.45802	1.58947	1.79704	1.51709
8063620	VAMP (vesicle-associated membrane protein)-associated protein B and C	VAPB	1.45961	1.26012	1.36881	1.41231	1.65182	1.36139	1.45317	1.4989	1.65821
8020129	VAMP (vesicle-associated membrane protein)-associated protein A, 33kDa	VAPA	0.988343	0.963264	0.808365	0.954145	0.963264	0.963264	1.16721	0.933267	1.10162
7906602	vang-like 2 (van gogh, Drosophila)	VANGL2	1.3794	1.33025	1.28863	1.47365	1.28286	1.12987	1.33492	1.3048	1.39799
7904211	vang-like 1 (van gogh, Drosophila)	VANGL1	1.01272	1.10249	0.973811	1.17718	0.731413	0.923376	1.01272	1.01272	1.09891
8043197	vesicle-associated membrane protein 8 (endobrevin)	VAMP8	0.960927	0.812234	1.09632	1.2729	1.07138	1.05763	1.28465	1.04196	0.978103
8171041	vesicle-associated membrane protein 7	VAMP7	0.677759	0.801494	0.742795	0.889333	0.774012	0.866587	0.866587	0.785333	1.19091
8176962	vesicle-associated membrane protein 7	VAMP7	0.677759	0.801494	0.742795	0.889333	0.774012	0.866587	0.866587	0.785333	1.19091
8043203	vesicle-associated membrane protein 5 (myobrevin)	VAMP5	2.28737	2.54097	2.22937	2.18174	2.09159	2.08594	2.09402	2.1217	2.24914
7922309	vesicle-associated membrane protein 4	VAMP4	1.06408	0.7472	0.787861	0.844923	0.841906	0.882567	0.841906	0.946712	0.663112
7897370	vesicle-associated membrane protein 3 (cellubrevin)	VAMP3	1.31835	1.15252	1.21545	1.17194	0.955475	1.18534	1.07014	1.06653	1.0792
8012376	vesicle-associated membrane protein 2 (synaptobrevin 2)	VAMP2	2.01219	1.93211	1.90441	1.78024	1.39566	1.58253	1.52255	1.70229	1.75223
7960544	vesicle-associated membrane protein 1 (synaptobrevin 1)	VAMP1	1.55207	1.23144	1.53776	1.453	1.34247	1.5589	1.44	1.47724	2.0801
8002421	Vac14 homolog (S. cerevisiae)	VAC14	2.0484	1.69725	1.98252	2.20163	1.59184	1.68382	2.27603	2.42405	2.23215
8172358	ubiquitously-expressed transcript	UXT	1.07137	1.19212	1.03371	1.19691	1.1305	1.60652	1.28534	1.51935	2.30467
8054395	UDP-glucuronate decarboxylase 1	UXS1	1.21328	1.35769	1.21155	1.35769	1.35769	1.1736	1.70343	1.50678	1.77865
7942626	UV radiation resistance associated gene	UVRAG	0.966746	1.0213	0.830819	0.770322	0.944556	0.952911	0.904101	0.791651	1.06309
8177137	ubiquitously transcribed tetratricopeptide repeat gene, Y-linked /// hypothetical protein LOC100130224	UTY /// LOC100130224	0.909419	0.902737	0.808031	0.804752	0.802751	0.977083	0.674557	0.758616	0.885406
8166956	ubiquitously transcribed tetratricopeptide repeat, X chromosome	UTX	1.09829	0.896912	0.831454	0.73326	0.848657	1.08541	0.765619	0.863281	0.982584
8010783	urotensin 2 receptor	UTS2R	1.95503	2.13877	2.42822	2.27676	1.94339	2.04661	2.0268	2.39578	1.94339
8092741	urotensin 2 domain containing	UTS2D	0.689705	0.808697	0.644219	0.723846	0.624302	0.783387	0.732886	0.701879	0.74261
7912136	urotensin 2	UTS2	0.82875	0.97104	0.884104	0.884104	0.841361	0.901435	0.884104	0.868825	0.984571
8122464	utrophin	UTRN	0.817106	0.828433	0.824624	0.828433	0.907279	0.840876	0.824731	0.828433	0.751231
8014081	UTP6, small subunit (SSU) processome component, homolog (yeast)	UTP6	0.75787	0.944714	0.872259	0.852139	0.943311	1.06227	0.945016	0.948881	0.99549
8095539	UTP3, small subunit (SSU) processome component, homolog (S. cerevisiae)	UTP3	0.908065	0.996269	0.92108	0.816753	1.03844	1.03028	0.912852	0.924043	0.73619
7957890	UTP20, small subunit (SSU) processome component, homolog (yeast)	UTP20	0.851564	0.851564	0.791253	1.02136	0.912149	0.868488	0.908323	0.904706	0.806956
8008530	UTP18, small subunit (SSU) processome component, homolog (yeast)	UTP18	0.871539	0.812836	0.780817	0.893229	0.934861	0.978857	1.19366	0.829509	1.12792
8106193	UTP15, U3 small nucleolar ribonucleoprotein, homolog (S. cerevisiae)	UTP15	0.934483	0.735296	0.735015	0.779313	0.9237	0.728633	0.715028	0.736887	0.735015
7969228	UTP14, U3 small nucleolar ribonucleoprotein, homolog C (yeast) /// asparagine-linked glycosylation 11 homolog (S. cerevisiae, alpha-1,2-mannosyltransferase)	UTP14C /// ALG11	0.88995	0.953392	0.775313	0.918779	0.968121	0.77298	0.880536	0.936396	0.847465
8169868	UTP14, U3 small nucleolar ribonucleoprotein, homolog A (yeast)	UTP14A	0.820028	0.983438	0.880474	0.820028	0.820028	0.768196	0.831123	0.830638	0.768196
7900201	UTP11-like, U3 small nucleolar ribonucleoprotein, (yeast)	UTP11L	0.813257	0.702638	0.812224	0.853007	0.763105	0.898559	0.763105	0.659881	0.698217
7931553	undifferentiated embryonic cell transcription factor 1	UTF1	3.93667	3.84449	3.93798	3.6939	3.94925	4.0008	3.90654	3.89932	4.11087
8122660	uronyl-2-sulfotransferase	UST	1.17229	1.10856	1.20897	1.17229	1.25671	1.01007	1.17229	0.944549	1.17229
7968333	ubiquitin specific peptidase like 1	USPL1	0.82248	0.809379	0.765361	0.884247	0.903897	0.804532	0.725659	0.900291	0.779427
8176578	ubiquitin specific peptidase 9, Y-linked (fat facets-like, Drosophila) /// hypothetical protein LOC100130216	USP9Y /// LOC100130216	0.756253	0.918214	0.890003	0.790942	0.818764	0.719823	0.84272	0.763105	0.703545
8166826	ubiquitin specific peptidase 9, X-linked	USP9X	1.04868	0.93288	0.861854	0.93288	0.915644	0.93288	0.82079	0.93288	0.93288
7983663	ubiquitin specific peptidase 8	USP8	0.822315	0.717255	0.615503	0.875326	0.763105	0.920076	0.869529	0.811974	0.742521
7999326	ubiquitin specific peptidase 7 (herpes virus-associated)	USP7	0.951551	0.993246	0.951551	0.799879	0.91861	0.885636	0.748817	0.827496	1.00873
7932023	USP6 N-terminal like	USP6NL	0.845936	0.869027	1.03431	0.890715	0.980079	0.890715	0.890715	0.867522	0.823207
8004086	ubiquitin specific peptidase 6 (Tre-2 oncogene)	USP6	0.892259	0.73605	0.939057	0.766603	1.1154	0.879378	0.931785	0.929678	0.932224
7934411	ubiquitin specific peptidase 54	USP54	0.941076	0.760887	0.795854	0.856719	0.940087	0.847749	0.886916	0.856719	1.00673
8097098	ubiquitin specific peptidase 53	USP53	0.875382	0.905631	0.858499	0.844099	0.833827	0.818432	0.628565	0.883813	0.805435
8173174	ubiquitin specific peptidase 51	USP51	1.20566	1.35697	1.45504	1.26881	1.93589	1.48326	1.33964	1.35697	1.47311
7988705	ubiquitin specific peptidase 50	USP50	0.851564	1.00009	0.851564	0.850454	0.837815	0.672771	0.843061	0.877436	0.851564
7953483	ubiquitin specific peptidase 5 (isopeptidase T)	USP5	1.24768	1.69143	1.25694	1.69243	1.44131	1.38988	1.38569	1.44337	1.50536
8126347	ubiquitin specific peptidase 49	USP49	0.915116	0.915116	0.996566	0.855896	0.881223	1.16934	0.858146	0.87019	0.915116
7913415	ubiquitin specific peptidase 48	USP48	0.853642	0.823307	0.854437	0.823307	0.953726	0.768196	0.896324	0.823307	0.86253
7938448	ubiquitin specific peptidase 47	USP47	0.840907	0.845498	0.917531	0.772722	0.847466	0.675632	0.831593	0.750267	0.777332
8100328	ubiquitin specific peptidase 46	USP46	0.880786	0.96016	0.93085	0.899686	0.608876	0.729021	0.915116	0.880786	0.814831
8128409	ubiquitin specific peptidase 45	USP45	0.934199	0.789518	0.744109	0.937802	0.715474	0.724725	0.754253	0.700047	0.820404
7965565	ubiquitin specific peptidase 44	USP44	0.922168	0.782948	0.798401	0.698109	0.924646	0.646277	1.07387	0.821519	0.831583
8004905	ubiquitin specific peptidase 43	USP43	1.25894	1.02568	0.972335	1.11549	1.16612	1.02897	1.51122	1.08741	1.18157
8131387	ubiquitin specific peptidase 42	USP42	1.02364	1.35134	1.14173	1.16652	1.2078	1.13478	2.16075	1.06277	1.4252
8059801	ubiquitin specific peptidase 40	USP40	1.09228	0.891666	0.853116	1.09051	1.0343	1.138	1.11227	1.01886	1.0332
8087380	ubiquitin specific peptidase 4 (proto-oncogene)	USP4	0.989364	0.972554	1.01666	0.995682	1.17678	0.987436	1.19497	0.910128	1.23499
8043218	ubiquitin specific peptidase 39	USP39	1.04567	1.04733	1.0088	1.06778	1.05669	1.12902	1.03225	1.16071	1.15314
8097570	ubiquitin specific peptidase 38	USP38	0.826754	0.895347	0.895347	0.885489	0.832848	0.858492	0.693539	1.14618	1.03541
8058940	ubiquitin specific peptidase 37	USP37	0.73663	0.726331	0.761665	0.961741	0.774336	0.774336	0.659243	0.771791	0.701016
8018937	ubiquitin specific peptidase 36	USP36	1.13929	1.0299	1.16206	1.27344	1.35847	1.07397	1.16267	1.1879	1.18774
7942798	ubiquitin specific peptidase 35	USP35	0.922727	0.956413	1.15851	0.958958	0.901983	0.886704	0.958958	1.21237	0.899177
8052443	ubiquitin specific peptidase 34	USP34	0.801682	0.814905	0.831454	0.831454	0.942933	0.800164	0.831454	0.866777	0.831454
7917120	ubiquitin specific peptidase 33	USP33	0.662501	1.09264	0.964958	0.920726	0.851564	0.851564	0.9356	0.835748	0.851564
8017212	ubiquitin specific peptidase 32	USP32	0.924508	1.2012	0.922803	1.24334	0.894868	0.98806	0.98806	1.01048	0.98806
8000244	ubiquitin specific peptidase 31	USP31	1.47958	1.51565	1.25743	1.03647	1.39539	1.24568	1.2003	1.26852	1.36506
7958439	ubiquitin specific peptidase 30	USP30	1.28794	1.06732	1.04742	1.09012	1.11255	1.14665	1.12356	1.0455	1.12356
7984132	ubiquitin specific peptidase 3	USP3	1.10471	1.18744	1.10696	1.36498	1.10471	1.11551	1.1489	0.926924	1.09555
8031686	ubiquitin specific peptidase 29	USP29	0.699269	1.04265	0.761718	0.912256	0.722104	0.938783	0.937868	0.897979	0.87003
7951752	ubiquitin specific peptidase 28	USP28	0.92721	0.829967	0.80537	0.866587	0.830057	0.801983	1.32184	0.894678	0.932365
8167601	ubiquitin specific peptidase 27, X-linked	USP27X	1.27881	0.637713	1.26082	0.887279	0.802184	1.12054	0.99105	0.806829	0.950315
8175206	ubiquitin specific peptidase 26	USP26	0.759577	0.844127	0.914331	0.733634	0.693572	0.716576	0.824566	0.7816	1.04778
8067903	ubiquitin specific peptidase 25	USP25	0.834586	0.786077	0.952611	0.811852	0.884527	1.07068	0.972061	0.913377	1.0643
7916443	ubiquitin specific peptidase 24	USP24	0.841906	0.841906	0.841906	0.841906	0.841906	0.770787	0.866306	0.873862	0.841906
8013486	ubiquitin specific peptidase 22	USP22	2.10166	2.34228	2.15862	1.78323	2.44792	2.7619	3.06508	3.25035	3.86382
7906671	ubiquitin specific peptidase 21	USP21	2.9053	2.76676	1.81491	2.59007	2.9053	2.37175	3.04178	3.21697	3.49936
8158568	ubiquitin specific peptidase 20	USP20	0.860096	1.21666	1.14548	1.15616	1.13331	1.13473	1.12681	1.11609	1.02688
7952249	ubiquitin specific peptidase 2	USP2	0.932725	0.897024	0.896348	0.942899	0.805739	0.982754	1.03648	0.890934	0.898945
8087308	ubiquitin specific peptidase 19	USP19	1.22559	1.28566	1.15132	1.03757	1.21099	1.22559	1.65776	1.22814	1.34747
8074606	ubiquitin specific peptidase 18 /// ubiquitin specific peptidase 41	USP18 /// USP41	1.09237	1.27294	1.31904	1.72777	1.39566	1.30317	1.29577	1.30317	1.44006
8071155	ubiquitin specific peptidase 18	USP18	0.946161	1.78335	1.40339	1.24797	1.29698	2.34767	1.22831	1.03299	1.40763
8068062	ubiquitin specific peptidase 16	USP16	0.761968	0.68351	0.814123	0.823076	0.775583	0.916975	0.717271	0.618777	0.620286
7956670	ubiquitin specific peptidase 15	USP15	0.637853	0.866587	0.693932	0.682387	0.820315	0.782161	0.850634	0.854675	0.78014
8019807	ubiquitin specific peptidase 14 (tRNA-guanine transglycosylase)	USP14	0.990804	1.13152	0.920107	0.803735	1.00612	0.979292	0.905256	0.836799	1.11608
8084100	ubiquitin specific peptidase 13 (isopeptidase T-3)	USP13	0.988182	1.17939	1.25268	1.13943	0.892064	1.04365	1.11475	1.17486	0.838695
7970696	ubiquitin specific peptidase 12	USP12	0.75947	1.17475	0.59345	0.790942	1.39716	0.915116	1.19058	0.915116	0.880789
8167125	ubiquitin specific peptidase 11	USP11	1.88965	1.70112	1.82292	1.31257	1.80283	1.47806	1.53252	1.37745	1.9426
7997633	ubiquitin specific peptidase 10	USP10	1.17516	1.14161	0.469676	0.930976	1.1346	1.99858	1.01582	1.05936	1.61543
7901867	ubiquitin specific peptidase 1	USP1	0.982031	0.904082	0.990194	0.990194	1.00104	1.07603	0.990194	0.990194	0.834573
8095773	USO1 homolog, vesicle docking protein (yeast)	USO1	0.95771	0.723477	0.769727	0.893608	0.779834	1.05277	0.671243	0.758218	1.01783
8168416	upregulated during skeletal muscle growth 5 homolog (mouse)	USMG5	0.504632	0.870523	0.661949	0.738782	1.13588	0.953313	0.801476	0.775698	1.04341
7936091	upregulated during skeletal muscle growth 5 homolog (mouse)	USMG5	0.812247	1.23358	0.851564	0.92894	1.28932	0.850438	0.8744	0.710719	0.791062
8035254	Usher syndrome 1C binding protein 1	USHBP1	1.12062	1.05122	1.0497	1.2943	1.16415	1.1294	0.956743	1.12062	1.12062
7924233	Usher syndrome 2A (autosomal recessive, mild)	USH2A	0.92848	0.841906	0.735015	0.841906	0.841906	0.80604	0.823976	0.836751	0.807579
8018258	Usher syndrome 1G (autosomal recessive)	USH1G	2.75107	2.75107	2.65635	2.58676	2.96818	2.86019	2.75107	2.75107	2.75107
7946903	Usher syndrome 1C (autosomal recessive, severe)	USH1C	1.10662	0.936989	1.12335	1.19865	1.30817	0.97087	1.29715	1.15413	1.02442
8027805	upstream transcription factor 2, c-fos interacting	USF2	5.33994	5.3249	5.22775	5.11061	5.4328	5.34433	5.36037	5.11927	5.78932
7921738	upstream transcription factor 1	USF1	1.60631	2.329	1.59952	1.59012	1.79465	1.32937	2.03179	1.91034	1.8932
8026679	unconventional SNARE in the ER 1 homolog (S. cerevisiae)	USE1	2.15001	3.52881	1.66472	1.53344	2.12332	1.87438	1.94115	1.81343	2.12356
7936937	uroporphyrinogen III synthase (congenital erythropoietic porphyria)	UROS	3.00794	2.78847	2.29261	3.08987	2.73083	3.0448	2.77114	2.83469	3.57328
7901073	uroporphyrinogen decarboxylase	UROD	1.26465	1.34604	1.63522	1.33244	1.4	1.31918	1.56356	1.31161	1.42326
8090366	urocanase domain containing 1	UROC1	0.841193	0.985059	0.988382	1.0028	1.07692	1.00593	0.8393	0.999105	0.976792
8158242	ubiquitin related modifier 1 homolog (S. cerevisiae)	URM1	1.23737	1.36642	1.25277	1.25753	1.30077	1.25753	1.12032	1.29978	1.40425
8139256	up-regulated gene 4	URG4	1.17427	0.879948	0.835414	0.893572	0.676638	1.14544	0.885411	0.991039	0.869068
8069943	URB1 ribosome biogenesis 1 homolog (S. cerevisiae)	URB1	1.02394	0.98676	0.834595	1.10755	1.03409	0.946888	0.988087	0.906766	1.04485
8107998	ubiquinol-cytochrome c reductase, complex III subunit VII, 9.5kDa	UQCRQ	1.88601	1.43338	1.31315	1.62668	2.20597	2.04699	1.62668	1.53495	1.62668
7912670	ubiquinol-cytochrome c reductase hinge protein	UQCRH	1.85715	2.23564	1.00548	0.848603	0.824215	1.09613	1.15448	1.12512	1.08819
7901212	ubiquinol-cytochrome c reductase hinge protein	UQCRH	1.1981	1.53241	0.831454	1.13236	0.933078	0.987991	0.880906	0.920862	0.886367
8035880	ubiquinol-cytochrome c reductase, Rieske iron-sulfur polypeptide 1	UQCRFS1	3.42319	3.39963	3.42319	4.09974	3.0496	3.3038	3.37305	3.42319	3.51171
8073192	ubiquinol-cytochrome c reductase, Rieske iron-sulfur polypeptide 1	UQCRFS1	2.0032	2.13161	1.74064	1.42084	1.65311	1.79713	1.78953	1.82554	1.99436
7993872	ubiquinol-cytochrome c reductase core protein II	UQCRC2	1.24297	1.15451	1.22052	1.24835	1.22052	1.22052	1.22052	1.12732	1.22052
8087100	ubiquinol-cytochrome c reductase core protein I	UQCRC1	1.74521	1.96785	1.4345	1.08195	1.05772	1.24296	1.51073	1.58654	1.82119
8151909	ubiquinol-cytochrome c reductase binding protein	UQCRB	0.767325	0.905438	0.705229	0.835377	0.767325	0.594163	0.766215	0.640427	0.687713
8032284	ubiquinol-cytochrome c reductase, 6.4kDa subunit	UQCR	1.36779	1.55173	1.45775	0.914321	1.2704	1.85138	1.10146	1.26264	0.830344
8065889	ubiquinol-cytochrome c reductase complex chaperone, CBP3 homolog (yeast)	UQCC	1.04444	1.07912	1.11635	1.15101	1.14417	1.0428	1.15426	1.21019	1.30593
8168438	uracil phosphoribosyltransferase (FUR1) homolog (S. cerevisiae)	UPRT	0.806638	0.858416	1.03721	0.827286	0.985926	0.858416	0.858416	0.866103	0.824089
8045848	uridine phosphorylase 2	UPP2	1.19756	1.31633	1.47595	1.07049	1.18705	1.23937	1.05916	1.17635	1.14957
8132725	uridine phosphorylase 1	UPP1	1.43619	1.50882	1.61292	1.49365	1.44391	1.32388	1.38149	1.56672	1.54164
8133741	uroplakin 3B	UPK3B	1.51278	1.65851	1.73573	1.99317	1.71035	1.61958	1.73573	1.6554	1.73573
8073743	uroplakin 3A	UPK3A	1.44364	1.34356	1.40515	1.4034	1.80824	1.44549	1.59031	1.73259	1.44935
7944341	uroplakin 2	UPK2	1.47273	0.933277	1.5502	1.36789	1.5352	1.21624	1.13903	1.26979	1.12289
8081826	uroplakin 1B	UPK1B	0.943095	0.898208	0.987802	0.915856	0.907328	0.829158	0.838899	0.807329	1.07321
8027938	uroplakin 1A	UPK1A	1.21047	1.12109	1.34845	1.26947	1.14101	1.17655	1.08785	1.13236	0.924167
8174717	UPF3 regulator of nonsense transcripts homolog B (yeast)	UPF3B	0.805272	0.807698	0.997489	0.833295	0.868211	0.772596	0.807698	0.770712	0.787948
7970370	UPF3 regulator of nonsense transcripts homolog A (yeast)	UPF3A	2.93738	2.89871	3.0445	3.2807	2.83855	3.05278	2.95158	2.59738	2.61893
7932041	UPF2 regulator of nonsense transcripts homolog (yeast)	UPF2	0.966498	0.763439	0.89293	0.862582	0.851564	0.742291	1.01531	0.970433	0.851564
8027074	UPF1 regulator of nonsense transcripts homolog (yeast)	UPF1	1.56573	1.6503	1.93494	1.59593	1.6503	1.32103	1.75135	1.90419	1.84241
8071907	ureidopropionase, beta	UPB1	1.09545	0.998997	0.95101	1.05837	0.807334	0.711516	1.10851	0.939346	0.824954
7974647	TIMM9	UNQ9438	0.895784	0.88422	1.07772	0.580388	0.675639	1.05687	0.885368	0.782715	0.753778
8043993	AHPA9419	UNQ9419	0.989025	0.819887	1.06423	0.749978	0.851564	0.819887	0.739546	0.671582	0.819887
8144571	tryptophan/serine protease	UNQ9391	0.719777	0.884919	1.05808	1.40125	0.805545	0.894661	0.884919	0.763338	0.884919
8115732	VCEW9374	UNQ9374	0.851564	0.861433	0.851564	0.851564	0.997907	0.827164	0.851564	0.851564	0.916419
7986291	IFMQ9370	UNQ9370	0.934039	0.75042	0.860591	0.890925	0.823161	1.05519	0.847809	1.10058	0.866564
8103975	RTFV9368	UNQ9368	1.03705	1.14738	1.08807	1.16067	1.2732	1.3088	1.01066	1.13236	1.13236
8116992	FLFF9364	UNQ9364	0.925922	0.939786	0.857533	0.880091	0.885624	0.890715	0.805502	0.873359	0.946056
8006834	micronovel	UNQ9353	0.969339	1.12548	1.15735	0.936115	0.97241	1.09689	0.959835	1.28908	1.09689
8018184	CMRF35A4	UNQ9218	1.02399	0.902204	0.988217	1.2862	0.813469	0.904969	0.874354	0.921172	0.91421
8032751	AALS9165	UNQ9165	1.08138	0.997835	1.72079	0.930281	1.35936	1.37229	1.28187	1.27524	0.987967
8049239	ASCL830	UNQ830	2.18041	2.37884	2.63475	2.98252	2.57548	2.70995	2.57548	2.57812	2.58572
8051956	NGNL6975	UNQ6975	0.83874	0.734206	0.540756	0.640363	0.779614	0.733361	0.800711	0.673465	0.758248
8162249	QCWQ6494	UNQ6494	0.775169	0.899686	0.691694	0.904901	0.810858	1.15132	0.899686	1.12865	0.780557
8024444	EPWW6493	UNQ6493	1.16882	1.08119	1.19261	1.44031	1.18523	1.4193	1.04368	1.10696	0.989402
8086024	similar to YPLR6490	UNQ6490	1.43325	1.4817	1.29698	1.47795	1.52778	1.24627	1.28018	1.40646	1.24627
8085429	LMNE6487	UNQ6487	1.24052	1.37652	1.29698	1.63756	1.25787	1.29698	1.37921	1.53495	1.29176
7997166	ISPF6484	UNQ6484	0.931343	0.994654	0.931045	0.899686	0.839614	0.790199	0.839614	0.740996	0.613157
7951140	hypothetical LOC100131541	UNQ6228	0.849423	0.841113	0.899362	0.933958	1.00202	1.09845	0.910174	1.1102	0.604399
7897286	GSQS6193	UNQ6193	1.34779	1.53241	1.88255	1.32001	1.63945	1.4417	1.56146	1.44473	1.37865
7986248	AGVR6190	UNQ6190	3.6315	3.46219	3.46408	3.4075	3.60872	3.52028	3.47228	3.44338	3.60155
8036862	NINP6167	UNQ6167	0.999453	0.9364	1.08101	1.03359	0.951662	0.815438	1.01396	1.33104	1.05048
8076815	LPEQ6126	UNQ6126	1.32626	1.37417	1.37582	1.26005	1.35902	1.31489	1.12715	1.19535	1.2409
8082583	hypothetical LOC442092	UNQ6125	0.604006	0.476038	0.821759	0.759531	0.920515	1.01922	0.808031	0.845568	0.861746
8153457	LPPA601	UNQ601	0.669146	1.02957	1.04175	0.928354	1.05304	0.847933	0.878979	1.52449	0.976576
8089472	VGSA5840	UNQ5840	0.938193	1.07683	1.05593	0.992716	1.0335	1.01048	1.02385	1.19242	1.03866
8162664	HSAL5836	UNQ5836	2.03026	1.91592	2.16487	2.36079	2.25341	2.01102	1.61651	1.94458	2.03451
8050227	AILT5830	UNQ5830	1.09522	1.07067	0.968485	1.37368	1.08472	1.06157	1.29772	1.06805	1.05908
8116722	QIQN5815	UNQ5815	0.821033	0.817178	0.851498	0.73384	0.817178	0.884687	0.898588	0.687864	0.817178
8043630	RFVG5814 /// AT rich interactive domain 5A (MRF1-like)	UNQ5814 /// ARID5A	1.10589	1.15452	1.17088	1.2911	1.59258	1.31421	1.06897	1.35706	1.31421
8010237	GLPG464	UNQ464	1.32159	1.05821	1.45923	1.17753	1.36054	1.27218	1.32159	1.12286	1.28727
7989657	GKGM353	UNQ353	0.911912	0.988921	1.20025	1.02975	0.798717	0.825318	1.19354	1.1425	1.11077
8155167	hypothetical protein LOC646962	UNQ338	1.15132	0.780994	1.15132	1.10772	1.37236	1.38309	1.09304	1.13648	1.12151
7992996	GRTR3118	UNQ3118	0.929822	0.84296	0.908583	1.01403	0.714592	1.00506	0.797916	0.877453	0.808291
7960362	ACAH3104	UNQ3104	0.787601	0.770166	0.851564	1.00478	0.949191	0.775173	0.829042	0.851564	0.77322
8051319	VLCS3029	UNQ3029	0.878632	0.920845	0.750288	0.91605	0.973036	1.27049	0.974087	0.916605	0.854296
8095868	TSSP3028	UNQ3028	0.796374	0.768196	0.927895	0.768196	0.768196	0.88434	0.920208	0.768196	0.681261
7953622	hypothetical protein LOC283314	UNQ2963	1.16538	1.17877	1.52638	1.17877	1.05116	1.29491	1.35887	1.17877	1.09567
8090364	SERH2790	UNQ2790	1.03067	0.763105	0.757874	0.823907	0.814937	0.814937	0.979248	0.862115	0.951521
7943917	SFVP2550	UNQ2550	0.783686	0.783686	0.859519	0.783686	0.600829	0.961142	0.783686	0.760493	0.666536
8072353	VLGN1945	UNQ1945	1.03502	0.873953	1.01164	0.99081	0.946879	0.943293	1.01048	1.30745	0.943293
8005659	RVLA1944	UNQ1944	0.602671	0.73794	0.609628	0.91717	0.887537	0.888342	0.698556	0.957242	0.7525
8143127	HWKM1940	UNQ1940	0.993024	1.01121	1.06578	1.06465	1.30599	0.812223	0.744635	1.17898	1.09022
7967091	signal peptide peptidase 3	UNQ1887	1.58907	1.64571	1.44085	1.3455	1.15132	1.51425	1.62242	1.4731	1.76982
8104568	GALI1870	UNQ1870	0.793167	1.01942	0.856719	0.756427	0.763527	1.10409	1.03003	0.851627	0.856719
7969794	FRSS1829	UNQ1829	0.616074	0.614707	0.79162	0.768196	0.896579	0.768196	0.695755	0.7329	0.826514
7998457	unkempt homolog (Drosophila)-like	UNKL	1.62999	1.65411	1.46677	1.53504	1.715	1.67765	1.54595	1.93786	1.74961
7998466	unkempt homolog (Drosophila)-like	UNKL	1.65939	1.4388	1.58798	1.75265	1.59469	1.6435	1.56722	1.59469	1.59469
8009995	unkempt homolog (Drosophila)	UNK	2.32737	2.36373	1.8859	1.37246	1.83134	1.71833	1.88413	2.23269	2.07884
7958455	uracil-DNA glycosylase	UNG	0.981521	1.16526	1.09114	1.21189	0.827835	1.09002	1.01048	1.21189	1.14506
8131087	UNC homeobox	UNCX	3.88916	3.49686	3.4046	3.62961	3.43305	3.47653	3.2986	3.54705	3.44412
8094144	unc-93 homolog B3 pseudogene (C. elegans) /// unc-93 homolog B2 pseudogene (C. elegans) /// unc-93 homolog B6 (C. elegans) /// unc-93 homolog B4 pseudogene (C. elegans) /// hypothetical protein LOC100134161 /// similar to unc-93 homolog B1 (C. elegans) /// similar to unc-93 homolog B1	UNC93B3 /// UNC93B2 /// UNC93B6 /// UNC93B4 /// LOC100134161 /// LOC729196 /// LOC731528	2.41179	2.45351	2.17462	2.26844	2.16851	2.11018	1.77884	2.26475	2.26475
8138147	unc-93 homolog B3 pseudogene (C. elegans) /// unc-93 homolog B2 pseudogene (C. elegans) /// unc-93 homolog B6 (C. elegans) /// unc-93 homolog B4 pseudogene (C. elegans) /// hypothetical protein LOC100134161 /// similar to unc-93 homolog B1 (C. elegans) /// similar to unc-93 homolog B1	UNC93B3 /// UNC93B2 /// UNC93B6 /// UNC93B4 /// LOC100134161 /// LOC729196 /// LOC731528	2.1142	2.02282	1.88012	2.06447	1.87235	1.87072	1.67842	2.09089	1.93551
8088905	unc-93 homolog B3 pseudogene (C. elegans)	UNC93B3	3.0894	3.0894	3.19372	3.53213	3.49801	3.23348	2.78199	2.92671	3.02366
7949904	unc-93 homolog B1 (C. elegans)	UNC93B1	2.57812	2.144	2.21197	2.31792	2.39446	2.17988	2.01288	2.05792	2.49627
8123388	unc-93 homolog A (C. elegans)	UNC93A	0.938263	0.83382	0.916242	0.915116	0.925391	1.01095	0.906136	1.01048	0.822798
8076137	unc-84 homolog B (C. elegans)	UNC84B	1.47233	1.55351	1.94677	1.79227	2.10674	1.62309	1.80489	1.58394	1.89997
8131013	unc-84 homolog A (C. elegans)	UNC84A	1.27557	1.07725	1.16135	1.13236	1.13236	0.905886	1.13236	1.18944	1.26762
8145799	unc-5 homolog D (C. elegans)	UNC5D	1.04285	1.0497	1.0497	1.0497	1.0497	0.97009	1.03275	1.0497	1.0497
8126248	unc-5 homolog C (C. elegans)-like	UNC5CL	0.922236	1.00168	1.09847	1.17467	0.99246	1.13072	0.860455	0.987631	0.837222
8101788	unc-5 homolog C (C. elegans)	UNC5C	1.16341	1.282	1.16979	1.23107	1.15425	1.32813	1.21917	1.30761	1.12692
7928189	unc-5 homolog B (C. elegans)	UNC5B	1.43849	1.32352	1.4514	1.40562	1.36747	1.50111	1.60662	1.53429	1.80724
8110237	unc-5 homolog A (C. elegans)	UNC5A	1.39821	1.33435	1.76448	1.4732	1.39362	1.19295	1.43862	1.68016	1.4732
8043820	unc-50 homolog (C. elegans)	UNC50	0.81871	1.01852	0.869213	0.830009	0.822451	0.852879	0.851906	0.802879	0.88165
8006509	unc-45 homolog B (C. elegans)	UNC45B	0.955126	1.10643	0.867729	1.10328	1.07326	1.22171	1.40526	1.11946	1.00756
7986160	unc-45 homolog A (C. elegans)	UNC45A	1.26456	1.24784	1.2327	1.38112	1.44066	1.32038	1.31636	1.32038	1.00594
8018449	unc-13 homolog D (C. elegans)	UNC13D	1.24553	1.36422	1.47925	1.40095	1.31381	1.26286	0.991405	1.28538	1.24553
7983779	unc-13 homolog C (C. elegans)	UNC13C	0.679527	0.791034	0.729073	0.790093	0.727006	0.665505	0.799644	0.729073	0.729073
8154981	unc-13 homolog B (C. elegans)	UNC13B	1.39736	1.00048	1.18971	0.945485	1.05552	1.07174	1.14975	1.00611	1.11057
8035318	unc-13 homolog A (C. elegans)	UNC13A	1.17915	0.9074	1.29734	1.12569	0.940087	0.779005	0.809586	0.925849	1.0459
7959212	unc-119 homolog B (C. elegans)	UNC119B	1.18341	1.47615	1.30657	1.26048	1.13175	1.15132	1.38465	1.33262	1.14909
8013633	unc-119 homolog (C. elegans)	UNC119	2.88053	2.62761	2.20222	2.16248	2.25375	1.85111	2.52046	2.05708	2.32185
8082229	uridine monophosphate synthetase	UMPS	1.0085	0.6583	1.00245	0.791052	0.82276	0.786416	0.824569	1.02206	0.89516
8068740	uromodulin-like 1	UMODL1	0.956869	0.701215	1.01385	0.926766	0.941907	0.880852	0.915134	0.952406	1.08598
7999936	uromodulin (uromucoid, Tamm-Horsfall glycoprotein)	UMOD	1.20621	1.12749	1.32918	1.11577	1.20621	1.10466	1.27548	1.31227	1.19785
8086372	unc-51-like kinase 4 (C. elegans)	ULK4	1.04521	0.668058	0.727248	0.759424	0.811116	0.898482	0.688127	0.729541	0.658004
8086352	unc-51-like kinase 4 (C. elegans)	ULK4	0.98271	0.927593	0.994654	0.997671	1.12197	0.994654	0.994654	1.12992	0.994654
7990400	unc-51-like kinase 3 (C. elegans)	ULK3	2.29565	2.37506	2.62954	1.95191	2.28814	1.57541	2.36229	2.30095	2.80079
8013399	unc-51-like kinase 2 (C. elegans)	ULK2	0.943293	1.14701	0.865918	0.923218	0.962261	0.943293	0.943293	0.961907	0.943293
7959957	unc-51-like kinase 1 (C. elegans)	ULK1	3.45423	3.26278	2.99854	2.99299	3.21869	3.04789	3.47969	3.33525	3.85076
8130176	UL16 binding protein 3	ULBP3	1.14192	0.969476	1.12533	1.11868	0.8908	0.90758	1.10874	1.13126	1.09925
8122720	UL16 binding protein 2	ULBP2	1.01454	0.765276	1.42574	0.781411	0.978219	1.15566	0.93497	1.22054	0.940615
8122724	UL16 binding protein 1	ULBP1	0.865671	0.81218	0.877438	0.794437	0.860016	0.900871	0.837201	0.88517	0.994422
7911343	ubiquitin interaction motif containing 1	UIMC1	6.47027	6.14106	4.43115	2.18147	3.32606	4.99302	3.77815	4.21195	6.26568
8165703	ubiquitin interaction motif containing 1	UIMC1	6.47027	6.14106	4.43115	2.18147	3.32606	4.99302	3.77815	4.21195	6.26568
8115978	ubiquitin interaction motif containing 1	UIMC1	1.24199	1.20701	1.48526	1.45828	1.42556	1.31451	1.30206	1.30317	1.12991
8154316	ubiquitin-like, containing PHD and RING finger domains, 2	UHRF2	0.705625	0.830776	0.866587	0.736926	0.881665	0.890715	0.959779	1.01461	0.982731
7965723	UHRF1 (ICBP90) binding protein 1-like	UHRF1BP1L	0.824564	0.859181	0.953886	0.837391	0.859181	0.864273	0.937895	0.636719	0.758889
8118833	UHRF1 (ICBP90) binding protein 1	UHRF1BP1	1.0599	0.988836	1.02161	1.0497	0.94249	0.910344	1.26924	1.0497	1.12469
8024900	ubiquitin-like, containing PHD and RING finger domains, 1	UHRF1	1.02552	1.49363	1.13691	1.26633	1.81882	1.45402	1.04279	1.31428	1.60688
7906852	U2AF homology motif (UHM) kinase 1	UHMK1	1.34025	1.50125	1.24161	1.45876	1.31241	1.32038	1.64316	1.24005	1.24992
8097017	UDP glycosyltransferase 8 (UDP-galactose ceramide galactosyltransferase)	UGT8	0.859878	0.759486	0.790225	0.845873	0.827864	1.05854	0.749163	1.04968	0.845873
8111524	UDP glycosyltransferase 3 family, polypeptide A2	UGT3A2	0.77464	0.853827	0.684329	0.884602	0.838224	0.832593	1.03607	0.813548	0.753663
8111512	UDP glycosyltransferase 3 family, polypeptide A1	UGT3A1	0.813539	0.915022	0.919145	0.869628	0.813539	0.763109	0.802656	0.856435	0.780344
8095395	UDP glucuronosyltransferase 2 family, polypeptide B7	UGT2B7	0.775355	0.779102	0.683744	0.63206	1.0497	0.807744	0.71787	0.983112	0.627329
8100784	UDP glucuronosyltransferase 2 family, polypeptide B4	UGT2B4	0.673894	0.698789	0.61796	0.87697	0.81709	0.741082	0.658212	0.705555	0.736914
8100768	UDP glucuronosyltransferase 2 family, polypeptide B28 /// UDP glucuronosyltransferase 2 family, polypeptide B11 /// UDP glucuronosyltransferase 2 family, polypeptide B10	UGT2B28 /// UGT2B11 /// UGT2B10	0.710826	0.814737	0.726931	0.801841	0.802396	0.806215	0.802396	0.802396	0.615521
8095404	UDP glucuronosyltransferase 2 family, polypeptide B28	UGT2B28	0.841906	1.05161	0.938345	1.18972	1.07899	0.841906	0.79249	0.937269	0.634723
8100734	UDP glucuronosyltransferase 2 family, polypeptide B17	UGT2B17	0.585311	1.06584	1.01476	0.648548	0.733298	0.825529	0.830009	0.444586	0.580869
8100737	UDP glucuronosyltransferase 2 family, polypeptide B15 /// UDP glucuronosyltransferase 2 family, polypeptide B17 /// hypothetical LOC728160	UGT2B15 /// UGT2B17 /// LOC728160	0.779537	0.726674	0.758351	0.758351	0.758351	0.890715	0.758351	0.758351	0.757225
8100746	UDP glucuronosyltransferase 2 family, polypeptide B15 /// UDP glucuronosyltransferase 2 family, polypeptide B17 /// hypothetical LOC728160	UGT2B15 /// UGT2B17 /// LOC728160	0.779537	0.726674	0.758351	0.758351	0.758351	0.890715	0.758351	0.758351	0.757225
8095390	UDP glucuronosyltransferase 2 family, polypeptide B10	UGT2B10	0.436298	0.643073	0.718061	0.865725	0.583875	1.01048	0.638449	1.22425	0.716935
8100760	UDP glucuronosyltransferase 2 family, polypeptide A3	UGT2A3	0.834166	0.612458	1.14043	0.735001	0.786021	0.612851	0.773172	0.619443	0.775643
8100791	UDP glucuronosyltransferase 2 family, polypeptide A1 /// UDP glucuronosyltransferase 2 family, polypeptide A2	UGT2A1 /// UGT2A2	0.92244	0.974638	0.831454	0.839072	0.961462	0.755704	0.926748	0.839072	0.74324
8049349	UDP glucuronosyltransferase 1 family, polypeptide A1 /// UDP glucuronosyltransferase 1 family, polypeptide A3 /// UDP glucuronosyltransferase 1 family, polypeptide A4 /// UDP glucuronosyltransferase 1 family, polypeptide A5 /// UDP glucuronosyltransferase 1 family, polypeptide A7 /// UDP glucuronosyltransferase 1 family, polypeptide A8 /// UDP glucuronosyltransferase 1 family, polypeptide A6 /// …	UGT1A1 /// UGT1A3 /// UGT1A4 /// UGT1A5 /// UGT1A7 /// UGT1A8 /// UGT1A6 /// UGT1A9 /// UGT1A10	0.886829	0.943293	1.05605	1.06179	0.939987	1.02474	0.881779	0.94768	0.892756
8042270	UDP-glucose pyrophosphorylase 2	UGP2	1.03529	0.779325	0.718814	0.810621	0.763105	0.684603	0.718061	0.781719	0.763105
8099897	UDP-glucose dehydrogenase	UGDH	0.956471	0.875357	0.76389	1.05284	1.02503	0.942221	1.00001	1.01601	1.32914
7972369	UDP-glucose ceramide glucosyltransferase-like 2	UGCGL2	0.763105	0.763105	0.763105	0.763105	0.895427	0.739958	0.763105	0.783215	0.755117
8045090	UDP-glucose ceramide glucosyltransferase-like 1	UGCGL1	0.937932	1.05807	1.00684	0.94088	1.10847	0.95821	1.07986	0.849473	1.00684
8157216	UDP-glucose ceramide glucosyltransferase	UGCG	0.994654	1.00151	0.922221	0.994654	1.00151	1.0066	0.994654	1.06589	1.21665
8103998	UFM1-specific peptidase 2	UFSP2	1.01827	0.873435	0.809995	0.966214	0.68373	0.747714	0.821569	0.772158	0.824808
8141643	UFM1-specific peptidase 1 (non-functional)	UFSP1	1.9258	2.25836	2.38013	2.23072	2.11528	2.52156	2.24659	2.3147	1.89117
7968670	ubiquitin-fold modifier 1	UFM1	0.750156	0.893561	0.711134	0.843681	0.717058	0.768197	0.805014	0.732511	0.679369
7971124	ubiquitin-fold modifier 1	UFM1	0.703033	0.741084	0.818153	0.999869	0.763105	0.60088	0.763105	0.900808	0.540935
8074464	ubiquitin fusion degradation 1 like (yeast)	UFD1L	0.773611	1.22272	1.29698	0.892631	1.15132	0.939296	1.15132	1.46845	1.02655
7906662	ubiquitin-fold modifier conjugating enzyme 1	UFC1	2.88112	2.39092	2.15796	1.09389	0.96369	1.22208	1.01048	0.881862	1.05027
7947027	UEV and lactate/malate dehyrogenase domains	UEVLD	0.951768	0.943242	1.12859	0.818585	0.963242	0.921138	0.916806	0.79865	1.14035
8072274	ubiquinol-cytochrome c reductase complex (7.2 kD)	UCRC	1.8966	1.61777	1.82284	1.54848	1.37492	1.31939	1.39226	1.61777	1.83686
7950321	uncoupling protein 3 (mitochondrial, proton carrier)	UCP3	1.27259	1.26873	1.47733	1.56304	1.26743	1.10584	1.18376	1.30454	1.27259
7950307	uncoupling protein 2 (mitochondrial, proton carrier)	UCP2	0.883644	1.99011	1.07119	0.835361	1.15156	1.14509	1.06601	1.30963	1.18431
8102904	uncoupling protein 1 (mitochondrial, proton carrier)	UCP1	0.916115	1.36522	1.02706	1.17536	1.28994	0.998881	1.02706	1.02706	0.943293
7925950	urocortin 3 (stresscopin)	UCN3	1.30432	0.994654	1.16722	1.17484	1.17484	1.17484	1.15954	0.864944	1.17484
8086981	urocortin 2	UCN2	1.54815	1.8939	1.99056	1.75064	1.76724	1.87469	1.80962	2.49111	1.71274
8051061	urocortin	UCN	1.84413	2.09978	1.99969	2.41119	2.4142	2.111	2.40448	2.30143	2.26185
8067756	uridine-cytidine kinase 1-like 1	UCKL1	1.35909	1.29887	1.31507	1.54363	1.50291	1.39824	1.62567	1.45117	1.49551
7906995	uridine-cytidine kinase 2	UCK2	2.35306	2.65674	2.23672	2.35125	2.48927	2.09309	2.51863	2.39608	3.05901
8164653	uridine-cytidine kinase 1	UCK1	2.60371	2.49494	2.29872	1.71487	2.37678	2.62011	2.0996	2.32756	3.36921
8175782	UCHL5 interacting protein /// three prime repair exonuclease 2	UCHL5IP /// TREX2	1.22019	1.57841	1.48484	1.61225	1.67376	1.56789	1.56789	1.64444	1.56789
7923007	ubiquitin carboxyl-terminal hydrolase L5	UCHL5	0.751924	0.743417	0.761322	0.761322	1.02751	0.756609	0.879376	0.75491	0.729559
7969428	ubiquitin carboxyl-terminal esterase L3 (ubiquitin thiolesterase)	UCHL3	1.32038	0.797757	0.827987	0.821248	0.885386	1.14176	0.918683	0.953735	1.09708
8094778	ubiquitin carboxyl-terminal esterase L1 (ubiquitin thiolesterase)	UCHL1	5.40993	5.38915	5.05097	3.62766	4.74422	4.82915	5.18979	4.83166	5.89499
8026490	urothelial cancer associated 1	UCA1	0.974232	0.877649	0.961526	1.72293	1.06736	1.27068	0.796837	0.941578	0.974232
8110169	UBX domain containing 8	UBXD8	0.870443	1.05062	1.08974	0.958622	1.09354	0.821014	1.09315	0.932322	1.48928
8093112	UBX domain containing 7	UBXD7	0.789536	0.900761	0.912067	0.977685	0.89351	1.05977	1.06002	0.914679	0.910081
8145691	UBX domain containing 6	UBXD6	0.555815	0.719916	0.798401	0.798401	0.857622	0.862713	0.92472	0.721336	0.580949
7913918	UBX domain containing 5	UBXD5	0.800901	1.05463	0.891809	0.962188	1.12247	1.08861	0.866363	0.789271	1.09989
8040503	UBX domain containing 4	UBXD4	1.25794	0.942386	1.00404	0.816279	0.958344	0.825375	1.14484	0.947413	0.941831
7898623	UBX domain containing 3	UBXD3	1.06859	0.786678	1.03061	0.843976	0.921384	0.873387	0.930761	1.04553	0.83607
8045455	UBX domain containing 2	UBXD2	0.911444	0.922844	0.835482	0.994859	0.978308	1.15312	1.23589	1.18722	0.933426
8032815	UBX domain containing 1	UBXD1	2.89873	3.34098	2.57696	2.58921	2.4863	2.93134	2.7365	2.64864	3.47755
8015969	upstream binding transcription factor, RNA polymerase I	UBTF	1.65894	1.90008	1.82039	1.66612	1.67539	1.54113	1.90175	1.78754	1.98241
8115806	ubiquitin domain containing 2	UBTD2	1.18291	1.0812	1.33499	1.23469	1.2008	1.15132	1.64858	1.53495	1.8343
7929649	ubiquitin domain containing 1	UBTD1	3.5228	3.97268	3.24935	3.04123	3.25378	2.57502	3.48812	3.39457	3.48632
8152148	ubiquitin protein ligase E3 component n-recognin 5	UBR5	0.907719	1.12457	0.88066	0.876907	0.820921	0.88143	0.796156	0.87114	0.890715
7913001	ubiquitin protein ligase E3 component n-recognin 4	UBR4	1.37942	1.4457	1.37942	1.2413	1.40719	1.36797	1.37942	1.37942	1.4765
8046213	ubiquitin protein ligase E3 component n-recognin 3	UBR3	0.872935	0.957464	0.717135	0.578334	0.739074	0.91975	0.69794	0.823516	0.849786
8119529	ubiquitin protein ligase E3 component n-recognin 2	UBR2	0.835054	0.858126	0.865023	0.846878	0.727528	0.958049	0.886832	0.869996	0.779489
7987981	ubiquitin protein ligase E3 component n-recognin 1	UBR1	0.92196	0.856719	0.856719	0.839389	0.851564	0.952082	0.808031	0.945178	0.856719
7946082	ubiquilin-like	UBQLNL	1.10465	0.947197	1.20358	1.13578	0.989141	1.01847	1.12741	1.32954	1.10465
7920912	ubiquilin 4	UBQLN4	2.4373	2.46534	2.33248	2.33884	2.23999	2.27753	2.20372	2.33884	2.39608
8091352	ubiquilin 4	UBQLN4	2.71487	1.75328	3.34197	2.43068	1.9628	1.85409	1.79432	2.12073	2.99809
7946078	ubiquilin 3	UBQLN3	0.833654	0.832211	0.950338	0.913032	0.74607	0.911358	1.05218	0.902916	0.817438
8167924	ubiquilin 2	UBQLN2	1.58842	1.5322	1.63216	1.53122	1.71851	1.42704	1.2603	1.79363	1.73138
8161988	ubiquilin 1	UBQLN1	0.969723	1.04981	1.06697	0.971308	0.890895	1.04981	1.37942	0.955287	1.22159
8086057	upstream binding protein 1 (LBP-1a)	UBP1	1.2025	0.83945	1.17252	1.21706	1.23069	1.14522	1.20243	1.29053	1.2025
7993035	ubinuclein 1	UBN1	1.15724	1.14877	1.2126	1.31242	1.43001	1.236	1.13374	1.2126	1.19363
8109597	ubiquitin-like domain containing CTD phosphatase 1	UBLCP1	0.874988	0.763105	0.831454	0.831454	0.851564	1.026	0.831454	0.764326	0.880142
7990361	ubiquitin-like 7 (bone marrow stromal cell-derived)	UBL7	1.37658	1.37658	1.32923	1.08272	1.19971	1.17465	1.31501	1.61921	1.37602
8025500	ubiquitin-like 5	UBL5	1.50508	2.5196	1.50157	1.82769	2.14393	1.67257	1.65284	1.69418	1.618
7903851	ubiquitin-like 4B	UBL4B	0.993101	0.893723	1.67089	1.0529	0.925401	0.948852	1.06707	1.0497	1.0497
8176098	ubiquitin-like 4A	UBL4A	1.53926	1.43331	1.59859	1.67355	1.57934	1.3648	1.69403	1.55061	1.9698
7970831	ubiquitin-like 3	UBL3	0.853475	1.08502	0.825385	0.799529	0.853475	1.08828	0.874267	0.853475	0.646591
7897685	UbiA prenyltransferase domain containing 1	UBIAD1	1.59001	1.84551	1.72758	1.56131	1.80897	1.66016	1.63564	1.18233	1.60675
7994095	ubiquitin family domain containing 1	UBFD1	1.44985	1.39285	1.23633	1.07564	0.997368	0.870695	1.28787	1.2269	1.18844
7897527	ubiquitination factor E4B (UFD2 homolog, yeast)	UBE4B	1.13187	1.0506	0.979059	1.05496	1.0611	0.945007	1.03387	1.0566	1.11843
7944195	ubiquitination factor E4A (UFD2 homolog, yeast)	UBE4A	0.999253	1.19356	1.15132	1.13236	0.924027	1.25013	1.13236	1.20155	1.13236
8137596	ubiquitin protein ligase E3C	UBE3C	1.12047	1.1057	1.07284	0.978016	1.15132	1.29522	1.15132	1.13604	1.56182
7958532	ubiquitin protein ligase E3B	UBE3B	1.17116	1.55696	1.2559	1.13066	1.28033	1.50058	1.44402	1.15612	1.34123
7986769	ubiquitin protein ligase E3A (human papilloma virus E6-associated protein, Angelman syndrome)	UBE3A	0.815227	0.866587	0.866587	0.771619	0.929089	0.866587	1.02446	0.910121	0.744069
8008139	ubiquitin-conjugating enzyme E2Z	UBE2Z	2.48927	3.18185	1.57005	1.82634	2.36999	2.48927	2.77082	2.78408	3.48063
8151401	ubiquitin-conjugating enzyme E2W (putative)	UBE2W	0.730109	0.886325	0.847644	1.13488	0.898205	0.892683	0.874533	0.799486	0.930067
8146379	ubiquitin-conjugating enzyme E2 variant 2	UBE2V2	1.0256	1.05755	1.1259	0.948412	1.13279	1.16873	1.20957	1.07679	1.06346
7901982	ubiquitin-conjugating enzyme E2U (putative)	UBE2U	0.767302	0.765492	1.00039	0.748222	0.825472	0.807916	0.863856	0.748536	0.710638
7923426	ubiquitin-conjugating enzyme E2T (putative)	UBE2T	0.80383	0.866101	0.922803	0.806881	0.911027	0.911027	0.993255	1.11791	1.39319
8039491	ubiquitin-conjugating enzyme E2S	UBE2S	2.73583	3.11339	2.9443	2.71254	3.4123	3.3758	3.96502	3.60649	4.38796
8012958	ubiquitin-conjugating enzyme E2S	UBE2S	2.37332	2.84483	2.69571	2.42048	3.14894	3.27349	3.83309	3.35511	4.41143
8154856	ubiquitin-conjugating enzyme E2R 2	UBE2R2	1.34718	1.08043	1.08408	1.03514	1.05921	1.35847	1.46773	0.89574	1.10647
7985044	ubiquitin-conjugating enzyme E2Q family member 2	UBE2Q2	1.12506	1.17793	1.31451	1.31451	1.17793	1.1502	1.04955	1.38457	1.09835
7920515	ubiquitin-conjugating enzyme E2Q family member 1	UBE2Q1	2.92878	2.76381	2.26441	2.026	2.31175	2.28251	2.49888	2.49888	2.83339
8018708	ubiquitin-conjugating enzyme E2O	UBE2O	1.62489	1.19591	1.34401	0.983626	1.34401	1.20107	1.92812	1.9885	1.98109
8170298	ubiquitin-conjugating enzyme E2N-like	UBE2NL	1.08554	1.13857	1.17953	0.966041	1.21855	1.18729	1.31163	1.25389	1.25071
7965471	ubiquitin-conjugating enzyme E2N (UBC13 homolog, yeast)	UBE2N	1.56269	1.19559	0.845721	2.09689	1.24318	1.15291	1.09784	0.995443	1.02896
8001111	ubiquitin-conjugating enzyme E2M pseudogene 1	UBE2MP1	1.54002	2.07805	1.29208	2.29489	1.35361	2.12158	1.79636	1.69629	1.78407
8039805	ubiquitin-conjugating enzyme E2M (UBC12 homolog, yeast)	UBE2M	3.95352	3.36251	2.34434	1.98148	3.20419	3.09865	2.26111	2.25814	3.02912
7948274	ubiquitin-conjugating enzyme E2L 6	UBE2L6	3.52825	3.42239	3.35689	3.34556	2.90091	3.322	3.36585	3.52247	3.69508
7968331	ubiquitin-conjugating enzyme E2L 3	UBE2L3	1.79154	1.85821	1.67052	1.54143	1.23788	1.62784	1.61616	1.34325	1.62784
8071547	ubiquitin-conjugating enzyme E2L 3	UBE2L3	0.89367	0.987482	1.20625	0.95646	0.974565	1.09096	1.0366	1.10428	1.41898
8094704	ubiquitin-conjugating enzyme E2K (UBC1 homolog, yeast)	UBE2K	1.12896	1.12571	1.11243	1.12975	1.02121	1.22427	1.14393	1.34867	1.64638
7911444	ubiquitin-conjugating enzyme E2, J2 (UBC6 homolog, yeast)	UBE2J2	1.40864	1.48667	1.40248	1.40248	1.13486	1.01729	1.38455	1.40248	1.40763
8128111	ubiquitin-conjugating enzyme E2, J1 (UBC6 homolog, yeast)	UBE2J1	0.995426	0.73001	0.909938	0.661835	0.909938	0.939245	0.877973	0.962712	0.909938
7992205	ubiquitin-conjugating enzyme E2I (UBC9 homolog, yeast)	UBE2I	1.17496	1.16579	1.00172	1.20522	1.12773	0.948259	1.0324	0.972156	1.22414
8142886	ubiquitin-conjugating enzyme E2H (UBC8 homolog, yeast)	UBE2H	1.50484	1.49478	1.55923	1.67257	1.57797	1.42468	1.30762	1.33551	1.51593
8070799	ubiquitin-conjugating enzyme E2G 2 (UBC7 homolog, yeast)	UBE2G2	1.6088	1.56502	1.35299	1.26882	1.45939	1.11349	1.30145	1.28495	1.58025
8011626	ubiquitin-conjugating enzyme E2G 1 (UBC7 homolog, yeast)	UBE2G1	1.15403	1.11927	1.09616	1.04032	1.10463	1.1389	1.07922	0.996049	1.10542
8049574	ubiquitin-conjugating enzyme E2F (putative)	UBE2F	1.21266	1.34634	1.16016	1.38616	1.7134	1.12043	1.33196	1.13465	1.88172
8046685	ubiquitin-conjugating enzyme E2E 4 pseudogene /// ubiquitin-conjugating enzyme E2E 3 (UBC4/5 homolog, yeast)	UBE2E4P /// UBE2E3	1.74538	1.70578	1.72541	1.45781	1.57961	1.64744	1.57431	1.77	1.9629
8166124	ubiquitin-conjugating enzyme E2E 3 (UBC4/5 homolog, yeast) /// ubiquitin-conjugating enzyme E2E 4 pseudogene	UBE2E3 /// UBE2E4P	2.06023	2.11227	2.22486	2.20854	2.70441	2.06023	2.36484	2.14625	2.06023
8078252	ubiquitin-conjugating enzyme E2E 2 (UBC4/5 homolog, yeast)	UBE2E2	1.03263	1.15132	1.17545	0.996704	1.13437	0.979573	1.23138	1.15132	1.47517
8078262	ubiquitin-conjugating enzyme E2E 1 (UBC4/5 homolog, yeast)	UBE2E1	1.04639	0.829674	1.0674	1.12585	1.0741	1.04639	1.17695	1.04639	1.04639
8168578	ubiquitin-conjugating enzyme E2D N-terminal like	UBE2DNL	1.66972	1.19351	1.66399	1.70966	1.50103	1.49965	1.66112	2.07293	1.40996
8132523	ubiquitin-conjugating enzyme E2D 4 (putative)	UBE2D4	1.57783	1.51696	1.39234	1.32493	1.74515	1.61101	1.64138	1.52121	1.61101
8064857	similar to Putative ubiquitin-conjugating enzyme E2 D3-like protein	UBE2D3P	0.816701	0.87601	0.568369	0.801445	0.710894	0.964926	1.02043	0.691583	1.11361
8102024	ubiquitin-conjugating enzyme E2D 3 (UBC4/5 homolog, yeast)	UBE2D3	1.05986	0.968874	0.929768	0.978439	1.37616	1.16189	1.22579	1.20867	1.01047
8108435	ubiquitin-conjugating enzyme E2D 2 (UBC4/5 homolog, yeast)	UBE2D2	1.39947	1.55583	1.39566	1.10987	1.39538	1.09599	1.58719	1.39947	1.69273
7927658	ubiquitin-conjugating enzyme E2D 1 (UBC4/5 homolog, yeast)	UBE2D1	0.851564	0.851564	0.788177	0.895914	0.851564	0.863508	0.851564	0.851564	0.851564
8127824	ubiquitin-conjugating enzyme E2C binding protein	UBE2CBP	1.00438	0.943293	1.20252	0.943293	0.709999	0.943293	0.960666	0.943293	0.960224
8063043	ubiquitin-conjugating enzyme E2C	UBE2C	1.7546	1.48769	1.93616	1.87075	1.77676	2.04731	2.07413	2.07413	2.07413
8108066	ubiquitin-conjugating enzyme E2B (RAD6 homolog)	UBE2B	1.24259	1.24938	1.29039	1.03417	1.20094	1.1555	1.22665	1.01198	1.22634
8169645	ubiquitin-conjugating enzyme E2A (RAD6 homolog)	UBE2A	1.04348	0.954804	1.12715	1.10389	1.01947	1.1632	1.08203	1.01849	1.08882
8124650	ubiquitin D /// gamma-aminobutyric acid (GABA) B receptor, 1	UBD /// GABBR1	1.13174	1.00941	1.07119	0.956758	0.901005	1.38578	0.920017	1.0174	1.00201
8178295	ubiquitin D /// gamma-aminobutyric acid (GABA) B receptor, 1	UBD /// GABBR1	1.10387	1.01541	1.01541	0.914188	0.955963	1.43172	0.915116	1.00013	1.00554
7967563	ubiquitin C /// ribosomal protein S27a /// ubiquitin B	UBC /// RPS27A /// UBB	6.67515	6.56805	5.9469	4.84889	6.52094	5.77187	6.41824	6.34126	7.21531
8005166	ubiquitin B /// ribosomal protein S27a /// ubiquitin C	UBB /// RPS27A /// UBC	4.34789	4.70828	4.13628	4.00909	4.29282	4.06686	4.21314	3.99307	4.78047
7944722	ubiquitin associated and SH3 domain containing, B	UBASH3B	1.14598	1.11314	1.16393	1.14184	1.0469	0.955135	1.15132	1.3099	1.18183
8068788	ubiquitin associated and SH3 domain containing, A	UBASH3A	0.773768	0.921032	1.04904	0.881136	0.90925	0.776492	0.791308	0.774695	0.698926
7905700	ubiquitin associated protein 2-like	UBAP2L	1.93546	1.9258	1.72747	1.85664	1.93546	2.17737	2.09437	1.9258	2.07069
8160722	ubiquitin associated protein 2	UBAP2	1.92588	1.82059	1.82188	1.64719	1.84412	1.92588	1.95665	1.95034	2.09046
8154872	ubiquitin associated protein 1	UBAP1	1.6996	1.55604	1.23652	1.22283	1.50017	1.10978	1.41335	1.20927	1.64715
7969776	UBA domain containing 2	UBAC2	1.31308	1.04413	0.965329	1.013	0.885953	1.04413	1.29339	0.940646	1.04413
8165064	UBA domain containing 1	UBAC1	1.65678	1.65214	1.34346	1.11734	1.62745	1.48022	1.4705	1.77488	1.3832
8087485	ubiquitin-like modifier activating enzyme 7	UBA7	1.25149	1.07666	1.31499	1.33102	1.58737	1.53548	0.935477	1.25738	1.2126
8100615	ubiquitin-like modifier activating enzyme 6	UBA6	0.772566	0.879763	0.768334	0.90649	0.986132	0.671769	0.751381	0.718771	0.734008
8027024	ubiquitin A-52 residue ribosomal protein fusion product 1	UBA52	3.1637	3.26542	3.28747	2.92202	3.34057	2.96398	3.30085	3.6088	3.61527
8082750	ubiquitin-like modifier activating enzyme 5	UBA5	0.819587	0.798401	1.04554	0.757457	0.764508	1.15558	0.778226	0.735367	0.798401
8088718	ubiquitin-like modifier activating enzyme 3	UBA3	0.960831	1.00318	0.846637	0.77236	0.789531	0.871575	0.873031	0.924316	0.848356
8027650	ubiquitin-like modifier activating enzyme 2	UBA2	1.1934	0.932284	1.0599	0.921647	1.0599	1.0599	1.0599	1.30154	1.4385
8167069	ubiquitin-like modifier activating enzyme 1	UBA1	2.00397	1.67065	1.5997	1.67286	1.92527	1.7676	1.50312	1.43023	1.67593
8159554	UDP-N-acteylglucosamine pyrophosphorylase 1-like 1	UAP1L1	2.97038	3.77174	3.40668	3.38924	3.13098	3.08385	2.94813	2.59456	3.04359
7906863	UDP-N-acteylglucosamine pyrophosphorylase 1	UAP1	1.07184	0.850785	1.30367	0.998888	0.998888	0.948842	0.936209	0.988147	0.799704
7990054	uveal autoantigen with coiled-coil domains and ankyrin repeats	UACA	0.774993	0.774993	0.703968	0.859746	0.774993	0.663941	0.774993	0.820037	0.891137
8031536	U2 small nuclear RNA auxiliary factor 2	U2AF2	1.75119	1.86525	1.45444	1.55141	1.77004	1.51081	2.03214	2.05908	2.61063
8036143	U2 small nuclear RNA auxiliary factor 1-like 4	U2AF1L4	1.60076	1.82964	1.77656	1.6998	1.92675	1.62039	2.13931	2.14084	1.91586
8070655	U2 small nuclear RNA auxiliary factor 1	U2AF1	1.12057	1.51372	1.29698	0.997313	1.18502	1.537	1.32325	1.36794	2.10142
7959586	U11/U12 snRNP 35K	U1SNRNPBP	0.850113	1.04203	0.886816	0.899458	1.10726	0.948905	1.05731	0.765919	0.803117
7902345	tRNA-yW synthesizing protein 3 homolog (S. cerevisiae)	TYW3	0.920624	0.843818	0.865299	0.678916	1.29431	1.03018	0.935955	0.950234	0.91363
8139935	tRNA-yW synthesizing protein 1 homolog B (S. cerevisiae)	TYW1B	0.890715	0.730002	0.914139	1.17252	1.01311	0.529672	0.793385	1.19162	0.890715
8133202	tRNA-yW synthesizing protein 1 homolog (S. cerevisiae)	TYW1	1.15631	1.5561	1.40651	1.40771	1.44974	1.25168	1.36119	1.00706	1.29832
7934114	trypsin domain containing 1	TYSND1	1.4749	1.63094	1.74901	1.55063	1.65577	1.64621	1.52214	1.77313	1.72958
8154367	tyrosinase-related protein 1	TYRP1	0.846735	0.787111	0.978083	0.758007	0.854651	0.867537	0.849822	0.750932	0.936231
8036224	TYRO protein tyrosine kinase binding protein	TYROBP	1.67604	1.91444	2.36947	1.93741	1.78025	1.91444	2.29405	2.0342	1.91444
7982938	TYRO3 protein tyrosine kinase	TYRO3	1.83276	2.31386	1.50645	1.41162	1.7245	2.02167	1.79515	1.80959	2.4783
7948085	tyrosinase (oculocutaneous albinism IA) /// tyrosinase-like (pseudogene)	TYR /// TYRL	0.862303	0.847184	0.875292	1.04477	0.860589	0.877057	0.91994	0.945419	0.793765
7942991	tyrosinase (oculocutaneous albinism IA)	TYR	0.895032	0.839875	0.987625	0.924628	0.903709	0.890715	0.839875	0.687864	0.830007
8019842	thymidylate synthetase	TYMS	1.08296	0.919177	0.922803	1.19957	1.54504	1.75604	1.55505	1.60216	2.15818
8077103	thymidine phosphorylase /// similar to MGC52679 protein	TYMP /// LOC440836	1.58436	1.71137	1.7139	1.61905	2.1361	1.85057	1.76129	1.6216	1.72696
8033996	tyrosine kinase 2	TYK2	2.24109	2.24109	2.33358	2.24109	2.15639	2.00477	2.64646	2.21823	2.5049
8074498	thioredoxin reductase 2	TXNRD2	1.78217	1.81686	1.65	1.92561	2.02262	1.76503	1.81574	2.06986	1.95134
7958174	thioredoxin reductase 1	TXNRD1	1.72002	1.3791	1.21383	1.06867	1.21595	1.42468	1.36749	1.42468	2.23902
8002660	thioredoxin-like 4B	TXNL4B	1.01413	1.12411	1.09276	0.898423	0.860901	0.795267	0.616264	0.90438	0.858632
8023920	thioredoxin-like 4A	TXNL4A	1.44295	1.51168	1.45073	1.36563	1.15582	1.76433	1.35787	1.16469	1.45271
8023450	thioredoxin-like 1	TXNL1	1.00951	0.887396	0.770314	0.75394	0.849706	0.77613	1.05649	0.87705	0.827402
7904726	thioredoxin interacting protein	TXNIP	3.31403	2.28692	1.49004	2.77724	4.82474	5.54298	2.00992	1.5574	2.96462
8054217	thioredoxin domain containing 9	TXNDC9	0.834825	0.758044	0.900041	0.778421	0.807241	0.874669	0.808031	0.731888	0.808031
8100519	thioredoxin domain containing 9	TXNDC9	0.655908	0.687864	0.775216	0.687864	0.609063	0.844535	0.512619	0.687864	0.738
8163193	thioredoxin domain containing 8 (spermatozoa)	TXNDC8	0.776922	0.699547	0.785773	0.781578	0.68373	0.988898	0.708906	0.734061	0.821318
8090972	thioredoxin domain containing 6	TXNDC6	1.01048	0.945238	1.0497	1.10073	1.01048	0.881375	1.06952	1.36799	0.888681
8123802	thioredoxin domain containing 5 /// muted homolog (mouse)	TXNDC5 /// MUTED	0.769872	1.23601	0.983715	0.823677	0.957577	1.01048	1.00414	0.882055	1.08898
8162833	thioredoxin domain containing 4 (endoplasmic reticulum)	TXNDC4	0.982515	1.25809	0.902872	0.985628	1.00341	0.842318	0.926122	1.02251	1.11759
8132349	thioredoxin domain containing 3 (spermatozoa)	TXNDC3	0.845578	0.676869	0.916562	0.710973	0.724302	0.705454	0.724302	0.760935	0.662069
8020123	thioredoxin domain-containing 2 (spermatozoa)	TXNDC2	0.912806	0.928635	1.07502	0.961128	0.904185	0.813665	1.11902	1.0706	0.787242
8004175	thioredoxin domain containing 17	TXNDC17	1.0497	0.763105	1.0497	1.0497	1.0497	1.1605	1.13615	1.03753	1.0497
7979158	thioredoxin domain containing 16	TXNDC16	0.746409	0.797164	0.824803	0.913909	0.794126	1.00342	0.946642	0.692505	0.793526
8108166	thioredoxin domain containing 15	TXNDC15	1.62583	1.74552	1.97202	1.76876	1.614	1.69678	1.9082	1.84065	1.75772
7940066	thioredoxin domain containing 14	TXNDC14	1.21076	1.48168	1.17843	0.934371	0.794409	1.14911	0.964589	1.17359	1.1036
8064939	thioredoxin domain containing 13	TXNDC13	1.15132	0.880581	0.759913	1.02712	1.00824	1.15132	1.24063	1.13494	1.64785
7916120	thioredoxin domain containing 12 (endoplasmic reticulum)	TXNDC12	1.0615	0.973836	0.834637	1.10962	1.0497	0.871649	1.05258	0.958019	2.12607
7999478	thioredoxin domain containing 11	TXNDC11	1.30922	1.41352	1.37539	1.35484	1.17811	1.29863	1.22384	1.33097	1.37576
8023735	thioredoxin domain containing 10	TXNDC10	0.741151	0.798599	0.978273	0.916284	0.987587	0.850432	0.815124	0.809617	0.901375
7974303	thioredoxin domain containing 1	TXNDC1	0.872456	0.879241	0.753689	0.856038	0.874133	0.798584	1.43039	1.04182	1.29241
8075778	thioredoxin 2	TXN2	1.47184	1.17281	1.5708	1.31916	1.15132	1.30263	1.31916	1.34228	1.36785
8163185	thioredoxin	TXN	1.33665	2.01354	1.55122	0.40438	1.06597	0.784467	2.87683	2.29777	2.99395
8129924	taxilin beta	TXLNB	0.866587	0.849766	0.932587	0.886742	0.832694	0.890715	0.791089	0.817016	0.845402
7899703	taxilin alpha	TXLNA	1.39707	1.25906	1.29698	1.28929	1.28929	1.2572	1.22418	1.28929	1.30252
8100210	TXK tyrosine kinase	TXK	0.920375	0.976461	0.877796	0.998047	0.964735	1.02981	1.1151	1.0627	0.812797
8020090	twisted gastrulation homolog 1 (Drosophila)	TWSG1	0.947657	0.759977	1.39647	0.800697	0.77002	0.976979	1.01608	0.799208	1.0489
8138454	TWIST neighbor	TWISTNB	0.938599	1.01061	0.95056	0.943815	0.851564	0.782621	0.914532	1.03824	1.13401
8138442	twist homolog 1 (acrocephalosyndactyly 3; Saethre-Chotzen syndrome) (Drosophila)	TWIST1	3.73635	3.77252	3.83179	3.39531	3.29792	3.61805	3.12155	3.09398	3.45876
8087860	twinfilin, actin-binding protein, homolog 2 (Drosophila) /// toll-like receptor 9	TWF2 /// TLR9	2.47892	2.66997	2.96716	2.75103	2.87573	2.87573	2.87573	2.87573	2.87971
7962441	twinfilin, actin-binding protein, homolog 1 (Drosophila)	TWF1	0.933261	1.19258	0.899566	0.883256	0.788673	0.890715	0.890715	0.867522	0.890715
8013906	twinfilin, actin-binding protein, homolog 1 (Drosophila)	TWF1	0.971712	1.07963	0.850629	0.857019	0.661197	0.882216	0.916533	0.848687	0.85979
7948685	terminal uridylyl transferase 1, U6 snRNA-specific	TUT1	1.25554	1.24955	1.4337	1.29748	1.28828	1.17253	1.12995	1.2003	1.34831
8003635	tumor suppressor candidate 5	TUSC5	1.49073	1.40783	1.26312	1.53705	1.36681	1.77169	1.50847	1.56948	1.65491
8087669	tumor suppressor candidate 4	TUSC4	1.07486	1.20099	1.36667	1.25718	1.18852	1.21641	1.09147	1.25524	1.17519
8144726	tumor suppressor candidate 3	TUSC3	1.36079	1.36712	1.21041	1.36891	1.34948	1.29943	1.34942	1.4347	1.6526
8087634	tumor suppressor candidate 2	TUSC2	2.23364	1.65799	1.76442	1.37404	1.65637	1.65637	1.65637	1.63418	1.78464
8160472	tumor suppressor candidate 1	TUSC1	1.32038	1.66279	1.23358	1.23358	0.974469	1.28905	1.23358	1.20097	1.10516
8123044	tubby like protein 4	TULP4	0.881064	0.970935	1.33162	1.02125	1.03186	0.988348	0.829416	1.036	1.12359
7953135	tubby like protein 3	TULP3	1.03341	1.03684	1.0177	0.94246	0.914357	0.84726	1.03341	1.03994	1.21384
8038246	tubby like protein 2	TULP2	1.28267	0.978802	1.01161	0.999869	1.0497	1.34497	1.01048	0.816995	0.961472
8125903	tubby like protein 1	TULP1	1.22272	1.33794	1.33794	1.33794	1.54929	1.33718	1.32818	1.32838	1.20296
8072407	taurine upregulated gene 1	TUG1	1.22818	1.51846	1.04005	1.30643	1.26728	1.30643	1.30643	1.52207	2.44547
7905428	tuftelin 1	TUFT1	0.937774	0.965417	0.955298	0.949056	0.937774	0.914975	0.912264	1.06353	0.79521
8000603	Tu translation elongation factor, mitochondrial	TUFM	4.25892	4.43508	2.67554	2.41945	2.36823	2.42084	2.34441	2.47665	2.51282
8076909	tubulin, gamma complex associated protein 6	TUBGCP6	1.35446	1.5382	1.47981	1.5382	1.5382	1.60019	1.61121	1.68936	1.40026
7981798	tubulin, gamma complex associated protein 5	TUBGCP5	0.714162	0.961816	0.908082	1.01379	0.948597	1.31374	0.87109	0.837073	0.822648
7983206	tubulin, gamma complex associated protein 4	TUBGCP4	0.872802	0.87961	1.18506	0.979946	0.98016	0.941734	0.95675	0.969525	0.93027
7972840	tubulin, gamma complex associated protein 3	TUBGCP3	0.959104	0.670744	0.890715	0.726404	0.81665	0.759593	0.948777	1.05727	0.889605
7937175	tubulin, gamma complex associated protein 2	TUBGCP2	1.32038	1.22768	1.11494	0.894473	0.828346	0.870042	0.964531	1.0599	1.28078
8007312	tubulin, gamma 2	TUBG2	1.64821	1.82189	1.51112	1.73964	1.57632	1.75025	1.73964	1.56346	1.72067
8007302	tubulin, gamma 1	TUBG1	3.00794	2.55462	2.83989	2.02815	2.47908	2.9005	3.05206	2.57352	3.7788
8128977	tubulin, epsilon 1	TUBE1	1.34986	0.886768	0.824456	1.07591	0.933769	0.921045	0.844003	0.974451	0.932513
8017150	tubulin, delta 1	TUBD1	1.09424	0.819885	0.939472	1.0077	0.755997	0.795148	0.794344	0.843032	0.629713
8020220	tubulin, beta 6	TUBB6	3.05811	2.6727	2.74777	2.79654	2.81197	3.09671	2.97967	2.43838	2.81197
8021919	tubulin, beta polypeptide 4, member Q /// tubulin, beta 8	TUBB4Q /// RP11-631M21.2	1.53495	1.4692	1.53495	1.56165	1.49427	1.53495	1.54585	1.53495	1.53495
7931674	tubulin, beta polypeptide 4, member Q /// tubulin, beta 8	TUBB4Q /// RP11-631M21.2	0.832659	0.662658	1.08918	0.953421	0.982688	0.999874	0.829222	0.734485	0.941183
8159786	tubulin, beta polypeptide 4, member Q /// similar to tubulin, beta 8	TUBB4Q /// LOC643224	1.29805	1.30392	1.792	1.5329	1.5552	1.47452	1.53239	1.56858	1.40863
8104119	tubulin, beta polypeptide 4, member Q	TUBB4Q	0.611128	1.12109	1.43036	0.431376	0.831854	1.04058	1.08009	2.3746	1.7739
8033233	tubulin, beta 4	TUBB4	1.49446	1.3213	1.5162	1.46875	1.95825	1.19927	1.39817	1.43439	1.39698
8159642	tubulin, beta 2C	TUBB2C	2.47569	2.29204	2.40653	2.3567	2.66617	2.63628	2.81545	2.84205	3.08444
8123651	tubulin, beta 2B	TUBB2B	1.70187	1.44483	1.22415	1.09796	1.68494	1.24882	1.25574	1.20935	1.16285
8123644	tubulin, beta 2A	TUBB2A	1.67052	1.68785	1.67052	1.67052	1.60107	1.57083	1.61027	1.98041	1.64933
8063716	tubulin, beta 1	TUBB1	1.01001	0.911876	1.02008	0.915549	1.01967	0.987991	1.27493	0.987991	1.27459
8117995	tubulin, beta	TUBB	5.59229	5.49706	4.50661	4.00602	5.2719	4.97898	6.12632	5.72731	6.19575
8177858	tubulin, beta	TUBB	5.59229	5.49706	4.50661	4.00602	5.2719	4.97898	6.12632	5.72731	6.19575
8179174	tubulin, beta	TUBB	5.59229	5.49706	4.50661	4.00602	5.2719	4.97898	6.12632	5.72731	6.19575
7931852	tubulin, alpha-like 3	TUBAL3	0.946577	0.959144	0.946836	0.834824	1.15377	1.11089	0.9137	1.14599	1.02171
8071147	tubulin, alpha 8	TUBA8	0.886923	1.11928	1.04308	0.992746	1.07816	1.04308	1.04308	1.22052	0.762683
8048518	tubulin, alpha 4b (pseudogene)	TUBA4B	1.29862	1.14402	1.29862	1.47959	2.04204	1.11983	1.31836	1.50269	1.43526
8059177	tubulin, alpha 4a	TUBA4A	1.0639	1.02923	1.05837	1.05752	0.990252	0.867121	1.18275	1.02894	0.975505
8055194	tubulin, alpha 3e	TUBA3E	1.47673	1.36635	1.79022	1.11617	1.02092	1.31661	1.35544	1.23734	1.58229
8045291	tubulin, alpha 3c /// tubulin, alpha 3d /// tubulin, alpha 3e	TUBA3C /// TUBA3D /// TUBA3E	1.14167	1.17704	1.42378	1.37695	1.23155	1.57948	1.11349	1.37119	1.25796
7970395	tubulin, alpha 3c /// tubulin, alpha 3d	TUBA3C /// TUBA3D	1.51428	1.64325	1.91073	1.66384	1.59569	1.61715	1.67548	1.82022	1.68314
7955179	tubulin, alpha 1c	TUBA1C	2.48145	2.96205	1.82514	1.34671	1.98873	1.91734	1.82514	1.73938	1.94574
7963046	tubulin, alpha 1b	TUBA1B	5.96134	5.97626	5.69229	5.52706	5.72668	5.96448	6.06948	5.72604	5.94163
7963054	tubulin, alpha 1a	TUBA1A	2.77612	2.11445	1.5359	1.07173	1.13584	1.30317	1.53126	1.24646	1.30317
7938269	tubby homolog (mouse)	TUB	1.27411	1.24591	1.27565	1.46257	1.29314	1.24832	1.41035	1.44234	1.45382
8131179	tweety homolog 3 (Drosophila)	TTYH3	6.36138	6.33938	5.56457	6.03594	6.02028	6.49082	6.38308	6.31719	6.72278
8009568	tweety homolog 2 (Drosophila)	TTYH2	1.20311	1.02259	1.39131	1.10415	1.17173	1.09455	1.1369	1.16208	1.2079
8031157	tweety homolog 1 (Drosophila)	TTYH1	1.22325	1.38309	1.25927	1.39637	1.31852	1.45237	1.31852	1.32146	1.30198
8176692	testis-specific transcript, Y-linked 9A /// testis-specific transcript, Y-linked 9B	TTTY9A /// TTTY9B	0.709186	0.88446	0.781377	1.03273	0.88446	0.888279	0.88446	0.813944	0.88446
8177195	testis-specific transcript, Y-linked 9A /// testis-specific transcript, Y-linked 9B	TTTY9A /// TTTY9B	0.709186	0.88446	0.781377	1.03273	0.88446	0.888279	0.88446	0.813944	0.88446
8176553	testis-specific transcript, Y-linked 8 /// testis-specific transcript, Y-linked 8-like	TTTY8 /// LOC100101118	0.77314	0.800313	0.872668	0.648899	0.718061	0.718061	0.718061	0.712969	0.718061
8177048	testis-specific transcript, Y-linked 8 /// testis-specific transcript, Y-linked 8-like	TTTY8 /// LOC100101118	0.77314	0.800313	0.872668	0.648899	0.718061	0.718061	0.718061	0.712969	0.718061
8176782	testis-specific transcript, Y-linked 6 /// testis-specific transcript, Y-linked 6B	TTTY6 /// TTTY6B	1.13602	1.15437	1.43186	1.65848	1.35501	1.07797	1.64366	0.888639	1.37314
8177347	testis-specific transcript, Y-linked 6 /// testis-specific transcript, Y-linked 6B	TTTY6 /// TTTY6B	1.13602	1.15437	1.43186	1.65848	1.35501	1.07797	1.64366	0.888639	1.37314
8177344	testis-specific transcript, Y-linked 5	TTTY5	1.01092	0.98864	1.08326	1.35432	1.28692	1.11609	1.215	1.17501	0.953358
8176558	testis-specific transcript, Y-linked 2 /// testis-specific transcript, Y-linked 2-like	TTTY2 /// LOC100101117	0.863673	1.06961	1.10344	1.04626	0.869631	1.00965	0.808245	0.930195	1.0066
8177053	testis-specific transcript, Y-linked 2 /// testis-specific transcript, Y-linked 2-like	TTTY2 /// LOC100101117	0.863673	1.06961	1.10344	1.04626	0.869631	1.00965	0.808245	0.930195	1.0066
8177217	testis-specific transcript, Y-linked 14	TTTY14	2.60573	2.59968	3.04065	2.88335	2.57812	2.44768	2.87456	3.0846	2.70665
8177282	testis-specific transcript, Y-linked 13	TTTY13	0.685312	1.24489	0.905811	1.37743	0.872384	0.878598	0.669417	0.991189	0.961388
8176471	testis-specific transcript, Y-linked 12	TTTY12	1.03175	0.851564	0.860415	0.921012	0.888416	0.844136	0.891399	0.851564	0.928149
8177085	testis-specific transcript, Y-linked 11	TTTY11	1.30062	0.91089	0.747939	0.976928	0.863734	1.10681	0.741751	0.696098	0.867853
8177261	testis-specific transcript, Y-linked 10	TTTY10	1.0794	0.703283	0.781405	0.85275	1.08404	0.951198	0.752403	0.602352	0.987171
8176429	testis-specific transcript, Y-linked 1 /// testis-specific transcript, Y-linked 1-like	TTTY1 /// LOC100101116	1.17666	1.2084	1.29364	1.2967	1.15216	1.49722	1.4311	1.43788	1.2967
8177108	testis-specific transcript, Y-linked 1 /// testis-specific transcript, Y-linked 1-like	TTTY1 /// LOC100101116	1.17666	1.2084	1.29364	1.2967	1.15216	1.49722	1.4311	1.43788	1.2967
8124262	TRAF and TNF receptor associated protein	TTRAP	0.63995	0.943293	0.887105	0.943293	1.02907	0.894658	0.943293	0.855618	1.22721
8020795	transthyretin (prealbumin, amyloidosis type I)	TTR	1.02478	0.919063	1.01664	1.1819	1.14836	0.999772	1.10257	1.3479	1.00841
8151042	tocopherol (alpha) transfer protein	TTPA	1.21183	0.763105	0.903951	1.08646	0.909016	0.885473	0.911753	0.683404	0.763775
8057056	titin	TTN	0.864505	0.886924	0.886924	0.886924	0.886924	0.886924	0.886924	0.935145	0.851294
8061620	tubulin tyrosine ligase-like family, member 9	TTLL9	1.24257	0.92008	1.03205	0.950424	1.41001	0.647355	0.915116	0.886816	0.852149
8076882	tubulin tyrosine ligase-like family, member 8	TTLL8	1.00715	0.870433	1.03212	1.38123	1.08635	1.24605	0.89589	1.28005	1.11363
7917199	tubulin tyrosine ligase-like family, member 7	TTLL7	0.737502	0.766896	0.764747	0.745391	0.800603	1.0018	0.793844	0.931555	0.770368
8016494	tubulin tyrosine ligase-like family, member 6	TTLL6	0.850464	0.827608	0.800235	1.09531	0.800005	0.757961	0.75503	1.00211	0.755939
7975815	tubulin tyrosine ligase-like family, member 5	TTLL5	1.11772	0.92014	0.93796	0.917917	0.963821	0.917917	0.937214	1.12171	0.8231
8048411	tubulin tyrosine ligase-like family, member 4	TTLL4	1.90876	2.72738	2.06086	0.882543	1.08944	1.2462	1.2462	1.01758	1.57495
8077612	tubulin tyrosine ligase-like family, member 3	TTLL3	0.820249	1.35225	1.00511	1.67147	1.23796	0.908281	1.18374	1.0615	1.07521
8123398	tubulin tyrosine ligase-like family, member 2	TTLL2	0.858668	0.837171	1.02446	0.939308	0.758236	0.786524	0.978928	0.821281	0.703312
7985963	tubulin tyrosine ligase-like family, member 13 /// neugrin, neurite outgrowth associated	TTLL13 /// NGRN	0.87272	0.851535	1.1218	0.971789	0.962587	0.783897	0.718061	0.691546	0.67545
8076569	tubulin tyrosine ligase-like family, member 12	TTLL12	3.02634	3.01694	3.01694	2.63578	2.51054	2.86318	2.9834	3.08435	3.21517
8163916	tubulin tyrosine ligase-like family, member 11	TTLL11	1.16693	1.45428	1.31972	1.37402	1.309	1.62836	1.19078	1.30163	1.45044
7896865	tubulin tyrosine ligase-like family, member 10	TTLL10	1.92386	1.83904	1.90619	1.75143	1.69295	2.22918	1.72478	1.46161	1.62354
8076547	tubulin tyrosine ligase-like family, member 1	TTLL1	1.22865	1.19555	1.14804	1.22865	1.0768	1.23572	1.2312	1.22865	1.22865
8044462	tubulin tyrosine ligase	TTL	0.986421	1.29846	1.15359	1.15359	1.03863	1.0221	1.05383	1.06363	1.37776
8120838	TTK protein kinase	TTK	0.858408	0.766243	0.808638	0.812224	0.82839	0.787637	0.836875	0.794883	0.813864
7904314	transcription termination factor, RNA polymerase II	TTF2	0.860399	0.808031	0.831454	0.779125	0.958047	0.959487	0.653955	1.02695	0.956455
8164729	transcription termination factor, RNA polymerase I	TTF1	0.630121	0.862166	0.789149	0.999869	1.10384	1.18147	0.76645	0.780253	0.847382
7940679	tetratricopeptide repeat domain 9C	TTC9C	0.978634	1.1337	0.994654	0.796836	0.883396	0.934252	1.19295	0.994654	1.14106
8036830	tetratricopeptide repeat domain 9B	TTC9B	2.16483	2.15882	2.40925	2.25273	2.30753	2.59926	2.21584	2.40068	2.25509
7975412	tetratricopeptide repeat domain 9	TTC9	1.54723	1.78994	1.59936	1.63109	1.92699	1.4262	1.73138	1.7861	1.9482
7976128	tetratricopeptide repeat domain 8	TTC8	0.745139	0.920686	0.920686	0.906509	1.05527	0.920686	0.920686	0.920686	0.920686
7980720	tetratricopeptide repeat domain 7B	TTC7B	1.62674	1.57356	1.52738	1.19084	1.52738	1.68037	1.48013	1.45273	1.48516
8041826	tetratricopeptide repeat domain 7A	TTC7A	1.25528	1.21385	1.22314	1.23355	1.27856	1.08641	1.06872	1.3267	1.12153
7974029	tetratricopeptide repeat domain 6	TTC6	0.667894	0.575713	0.731601	1.0756	0.731601	0.731601	0.642774	0.745561	0.692637
7977482	tetratricopeptide repeat domain 5	TTC5	0.879342	0.908397	0.831454	0.941495	0.941495	0.965763	0.829927	0.959067	1.0761
7901662	tetratricopeptide repeat domain 4 /// hypothetical protein LOC100129188	TTC4 /// LOC100129188	1.16145	0.998677	1.3571	1.59387	0.899694	1.44831	1.6911	1.24984	1.07988
7944271	tetratricopeptide repeat domain 36	TTC36	1.13107	0.933314	1.16849	1.12565	1.31022	1.336	1.35345	1.13611	1.053
8147864	tetratricopeptide repeat domain 35	TTC35	0.80815	0.656455	0.790942	0.790942	0.676953	0.855254	0.790942	0.627242	1.13676
8111788	tetratricopeptide repeat domain 33	TTC33	0.953752	0.993776	0.922077	0.978985	1.21152	0.998622	0.979731	0.909631	0.925041
8050503	tetratricopeptide repeat domain 32	TTC32	0.803588	0.800018	1.35348	0.839794	0.851564	0.851564	0.770632	0.871674	0.856719
8042874	tetratricopeptide repeat domain 31	TTC31	1.03497	1.14282	0.908311	1.24011	1.02492	0.885059	0.964984	1.02497	1.06474
8056995	tetratricopeptide repeat domain 30B	TTC30B	1.65345	1.04894	1.04871	1.36717	0.736843	1.04871	0.851653	1.29655	0.83428
8056999	tetratricopeptide repeat domain 30A	TTC30A	0.943293	1.10517	0.919001	0.914035	0.903957	0.70105	0.684872	0.688558	1.00774
8068522	tetratricopeptide repeat domain 3	TTC3	0.884549	0.841317	0.825241	0.816615	0.875836	1.19974	0.861542	0.735252	0.750531
8103064	tetratricopeptide repeat domain 29	TTC29	0.984995	0.836814	0.985496	0.89726	0.841906	0.927715	0.788764	0.857731	0.774777
8075142	tetratricopeptide repeat domain 28	TTC28	1.00617	0.917712	0.922803	0.899656	0.997335	0.922803	0.915116	0.892607	0.922803
8041360	tetratricopeptide repeat domain 27	TTC27	0.874203	0.99646	0.630385	0.981825	0.770003	0.786086	0.714549	0.689671	0.700688
8136495	tetratricopeptide repeat domain 26	TTC26	0.851564	1.01039	0.760123	0.80489	0.851564	0.938364	0.958908	0.851564	0.851564
8007176	tetratricopeptide repeat domain 25	TTC25	0.812242	1.16349	0.805535	0.681358	0.922571	0.85076	0.759939	0.549788	0.936747
7906177	tetratricopeptide repeat domain 24	TTC24	2.25461	2.10083	2.25063	2.28322	2.42673	2.26216	2.15175	2.35313	2.30886
7991485	tetratricopeptide repeat domain 23	TTC23	0.975789	1.11231	0.893335	0.978619	0.9897	1.01365	1.10114	1.15574	0.975763
7916425	tetratricopeptide repeat domain 22	TTC22	1.07857	1.27349	1.01218	1.02598	1.25421	0.860633	1.02589	0.998807	1.01218
8056426	tetratricopeptide repeat domain 21B	TTC21B	0.930289	0.740943	0.885369	0.781134	0.817384	0.778526	0.86977	0.767214	0.768458
8078857	tetratricopeptide repeat domain 21A	TTC21A	0.85592	0.754199	1.0108	0.959965	0.79523	0.877762	0.868978	1.09008	0.819278
8005141	tetratricopeptide repeat domain 19	TTC19	1.05304	1.0925	1.0599	1.03195	1.16758	1.0599	0.907845	1.09198	1.40763
7934334	tetratricopeptide repeat domain 18	TTC18	0.655908	0.920945	0.849094	0.768196	0.744798	0.768196	0.623418	0.919073	0.768196
7939434	tetratricopeptide repeat domain 17	TTC17	1.18775	0.955113	1.105	1.03681	1.09673	0.881342	0.940346	1.13601	1.11568
8158094	tetratricopeptide repeat domain 16	TTC16	1.16839	1.1886	1.17959	1.24644	1.14671	1.31616	1.03115	1.16376	1.23509
8040018	tetratricopeptide repeat domain 15	TTC15	1.19353	1.09731	1.4538	1.17229	1.17229	1.08933	1.21213	1.16072	1.08648
8084128	tetratricopeptide repeat domain 14	TTC14	0.856719	0.856719	0.865569	0.856719	0.805496	0.856719	0.856719	0.90986	0.849102
7925003	tetratricopeptide repeat domain 13	TTC13	0.554665	0.770672	0.986252	0.801443	0.843782	0.588446	0.940214	0.726098	0.734227
7943919	tetratricopeptide repeat domain 12	TTC12	0.849517	1.12109	1.18563	1.08898	1.01048	1.25785	1.27062	1.23783	0.920225
7987960	tau tubulin kinase 2	TTBK2	1.16459	0.897739	1.07399	1.2034	0.955087	1.07286	1.13641	1.13609	0.993252
8119765	tau tubulin kinase 1	TTBK1	1.4035	1.70282	1.94426	1.72139	1.62761	1.53255	1.76905	1.71253	1.61455
8153474	tissue specific transplantation antigen P35B	TSTA3	1.83903	1.99043	1.55449	1.36724	1.6474	1.68265	1.9749	1.62739	2.38867
8075857	thiosulfate sulfurtransferase (rhodanese)	TST	2.02616	1.84932	1.87231	1.58686	1.96778	1.71974	1.89109	1.75831	1.7702
8035684	testis-specific serine kinase 6	TSSK6	1.38022	1.27602	1.34392	1.29429	1.1655	1.6116	1.13187	1.46851	1.26714
7973652	testis-specific serine kinase 4	TSSK4	1.13984	1.10812	1.0827	1.15258	0.98066	1.17675	1.08454	1.54279	0.856584
7899790	testis-specific serine kinase 3	TSSK3	0.922803	1.10943	0.922803	0.798629	0.858571	1.0785	0.922803	0.922803	0.849233
8071196	testis-specific serine kinase 2	TSSK2	1.10498	0.964629	1.05431	0.987742	1.03305	1.31231	0.771288	1.02232	0.874007
8113573	testis-specific serine kinase 1B /// testis-specific serine kinase 1A pseudogene	TSSK1B /// TSSK1A	1.00002	1.16865	1.09421	1.15132	1.00498	1.15132	1.2462	1.1385	1.15132
7937813	tumor suppressing subtransferable candidate 4	TSSC4	1.35802	1.19009	1.35802	1.17057	1.22646	1.4621	1.20324	1.3688	1.31241
8050060	tumor suppressing subtransferable candidate 1	TSSC1	0.958259	1.22276	1.08335	1.08703	1.07316	1.02852	1.13497	1.30191	1.33398
8167790	TSR2, 20S rRNA accumulation, homolog (S. cerevisiae)	TSR2	0.856509	0.887719	0.739982	1.62881	1.11444	0.890715	0.699462	1.32077	1.00589
8011245	TSR1, 20S rRNA accumulation, homolog (S. cerevisiae)	TSR1	0.987991	0.942904	1.13158	1.02347	1.06328	0.987991	0.859643	0.987991	0.925574
8052200	TSPY-like 6	TSPYL6	1.46147	1.36228	1.7279	1.44601	1.55177	1.32796	1.38224	1.9779	1.12757
8151931	TSPY-like 5	TSPYL5	0.974888	0.971389	0.949888	1.01815	1.01502	1.05867	1.26733	1.21988	0.913405
8129089	TSPY-like 4	TSPYL4	1.51496	1.54401	1.51496	1.51496	1.80806	1.7263	1.75465	1.51496	1.39979
8065603	TSPY-like 3 (pseudogene)	TSPYL3	1.64821	1.35166	1.53495	1.34812	1.42175	1.50571	1.41421	1.53495	1.48836
8167763	TSPY-like 2	TSPYL2	1.23515	1.29259	1.14801	1.14184	1.22914	1.14184	1.07264	0.992588	1.14184
8129099	TSPY-like 1	TSPYL1	1.3924	1.3924	1.3924	1.3924	1.53325	1.3924	1.27071	1.3924	1.40106
8129097	TSPY-like 1	TSPYL1	0.864758	0.81239	0.735015	0.81239	0.861398	0.768196	0.81239	0.940772	0.827624
8073612	translocator protein (18kDa)	TSPO	2.07395	2.18135	2.06447	1.86515	1.98699	2.08922	1.96071	2.40476	2.25061
7953166	tetraspanin 9	TSPAN9	1.32888	1.27384	1.31737	1.35163	1.63015	1.34077	1.2462	1.32888	1.77565
7964927	tetraspanin 8	TSPAN8	0.773306	0.557347	0.9521	0.866498	0.977433	0.750561	0.807199	0.773306	0.773306
8166784	tetraspanin 7	TSPAN7	1.04711	1.2212	1.15373	0.899424	0.966939	0.994743	1.07808	0.879688	1.11298
8173941	tetraspanin 6	TSPAN6	0.936546	0.918138	0.871376	0.920934	0.841526	0.920934	1.00348	0.920934	0.920934
8101828	tetraspanin 5	TSPAN5	1.00478	1.15086	1.00496	0.812695	0.829223	0.81459	0.794019	0.98874	1.10326
7937518	tetraspanin 4	TSPAN4	3.54653	3.79199	3.49276	3.43312	3.41969	3.66818	4.11372	3.78462	4.5678
8136067	tetraspanin 33	TSPAN33	1.03003	0.953507	1.2455	0.935221	1.16461	0.985153	1.03003	1.0636	0.856719
7937782	tetraspanin 32	TSPAN32	1.55686	1.50675	1.72422	1.50641	1.55686	1.54371	1.49674	1.44611	1.7688
7956613	tetraspanin 31	TSPAN31	3.11924	3.29293	2.89892	2.20129	2.61867	2.55848	2.97165	2.97165	3.42394
7990620	tetraspanin 3	TSPAN3	4.84232	4.64969	3.87789	3.48806	4.08311	3.65647	4.55234	4.1778	5.26929
7918857	tetraspanin 2	TSPAN2	0.85989	0.750578	0.836388	0.782717	0.794232	0.882856	0.956129	0.928295	0.767359
7939559	tetraspanin 18	TSPAN18	1.58435	1.3154	1.50319	1.3154	1.90753	1.35892	1.3154	1.39101	1.2707
8110224	tetraspanin 17	TSPAN17	3.33657	3.13584	2.96377	2.61159	2.71383	2.97138	2.67095	2.89737	3.48423
8025858	tetraspanin 16	TSPAN16	0.824565	0.876319	0.876834	0.871929	0.831417	0.801418	0.694059	0.886823	0.6022
7928046	tetraspanin 15	TSPAN15	1.32038	1.15759	1.37579	1.4766	1.39156	1.29598	1.469	1.37538	1.32038
7928705	tetraspanin 14	TSPAN14	2.15382	1.77136	1.39885	1.70908	1.75587	1.60079	1.75331	1.94149	1.74967
8131600	tetraspanin 13	TSPAN13	1.38518	1.36166	1.46332	1.25651	1.20364	1.42609	1.50053	1.56905	1.57102
8142524	tetraspanin 12	TSPAN12	0.892431	0.798406	1.12552	1.14945	0.872094	0.881811	0.925099	0.865412	0.7771
7954645	tetraspanin 11	TSPAN11	0.924087	1.43408	1.36512	1.18264	1.047	1.0004	0.959684	0.992977	1.42503
8010624	tetraspanin 10	TSPAN10	1.65307	1.65307	1.53495	1.95225	1.63053	1.79391	1.3901	2.03015	1.52469
7901175	tetraspanin 1	TSPAN1	0.858282	1.01596	1.02177	0.993288	1.05067	1.13176	0.927233	0.97572	0.874761
8086660	testes-specific protease 50	TSP50	2.31859	2.20391	2.03391	2.43606	2.4139	2.21439	2.10255	2.55132	2.19706
7996654	translin-associated factor X interacting protein 1	TSNAXIP1	0.980428	1.10591	1.0626	1.00817	0.947275	0.800759	0.969144	0.957634	0.857308
7910550	translin-associated factor X	TSNAX	0.71746	0.763668	0.849701	0.762542	0.74035	0.845736	1.03834	0.767815	0.680074
8153304	t-SNARE domain containing 1	TSNARE1	0.9013	1.19673	1.12861	1.23729	1.32883	1.02556	1.00558	1.19354	1.04293
8044965	translin	TSN	0.948642	0.994654	0.793814	0.98174	0.869268	0.969495	0.873348	0.954804	1.04206
8107270	thymic stromal lymphopoietin	TSLP	1.03145	0.727395	0.787732	1.03556	0.862944	0.720089	0.718218	0.779165	0.852032
7942674	tsukushin	TSKU	6.74667	6.20592	5.42277	4.30987	3.72331	4.47086	4.7301	4.37146	5.0731
8038427	testis-specific kinase substrate	TSKS	1.24958	1.50628	1.4333	1.5072	1.42024	1.39555	1.43847	1.25762	1.30892
8035896	teashirt zinc finger homeobox 3	TSHZ3	0.940345	0.96859	1.11676	0.950337	1.05486	1.08033	0.992366	1.04234	0.893061
8063437	teashirt zinc finger homeobox 2	TSHZ2	0.915116	0.866587	0.915116	0.966948	0.937794	1.11797	0.915116	0.915116	0.845963
8063444	teashirt zinc finger homeobox 2	TSHZ2	0.677082	0.749873	0.796374	0.732436	0.813706	0.971056	0.798401	0.837752	0.645463
8021768	teashirt zinc finger homeobox 1	TSHZ1	1.15569	1.0809	1.13812	0.762405	1.0809	0.858583	1.04074	1.06975	1.20613
7976037	thyroid stimulating hormone receptor	TSHR	0.748778	0.899936	0.938223	0.91557	0.872629	1.11816	1.00965	1.03169	0.938223
7904203	thyroid stimulating hormone, beta	TSHB	0.802421	0.681405	0.751302	0.757484	0.697244	0.710144	0.765874	0.820766	0.569414
8142930	testis specific, 14	TSGA14	1.11061	0.831749	1.1239	0.930421	0.930421	1.04094	1.08243	0.930421	0.881795
8142945	testis specific, 13 /// coatomer protein complex, subunit gamma 2	TSGA13 /// COPG2	0.866587	0.866587	0.921635	0.866587	0.930875	1.01534	0.793713	0.866587	0.792885
7941469	testis specific, 10 interacting protein	TSGA10IP	1.27003	1.70326	1.10322	1.49671	1.6223	1.35037	1.30167	1.27003	1.12391
8054166	testis specific, 10	TSGA10	0.851564	0.808031	1.01583	0.956336	0.808031	0.70964	0.98134	0.73279	0.808031
7947015	tumor susceptibility gene 101	TSG101	1.21935	1.0498	1.25496	0.867361	1.53447	1.34959	1.17725	1.3136	1.30093
7956639	Ts translation elongation factor, mitochondrial	TSFM	1.06278	0.847459	0.995811	1.18275	0.930421	0.817531	0.930421	0.904004	1.03242
8009832	tRNA splicing endonuclease 54 homolog (S. cerevisiae)	TSEN54	2.00493	2.00493	2.00493	2.00967	2.35507	2.00493	2.12509	1.97343	2.20864
8031145	tRNA splicing endonuclease 34 homolog (S. cerevisiae)	TSEN34	1.76025	1.58295	1.90083	2.31987	2.55159	2.74946	1.92012	1.83422	1.78256
8077914	tRNA splicing endonuclease 2 homolog (S. cerevisiae)	TSEN2	1.07508	1.23022	1.09176	1.07508	1.07508	1.10896	1.0877	1.23725	1.00934
8141526	TSC22 domain family, member 4	TSC22D4	3.5837	2.89392	3.08437	2.05169	1.95932	1.90729	2.42271	2.02069	2.53428
8174361	TSC22 domain family, member 3	TSC22D3	1.31514	1.1825	1.4693	1.61452	1.07144	1.54312	1.35119	1.17686	1.36968
8083324	TSC22 domain family, member 2	TSC22D2	1.94912	2.06006	1.76548	1.80489	1.68705	1.7593	1.93066	1.83857	2.02912
7971350	TSC22 domain family, member 1	TSC22D1	1.15132	1.11823	1.15132	1.15132	1.15132	1.37799	1.15132	1.12113	1.15132
7992474	tuberous sclerosis 2	TSC2	1.55888	1.57022	1.38768	1.57022	1.57022	1.4801	1.53563	1.71985	1.64504
8164781	tuberous sclerosis 1	TSC1	1.14115	1.30941	1.05491	1.1166	1.09118	1.17471	1.26415	1.10353	1.15104
8143486	trypsin X3	TRYX3	0.766593	0.866271	0.645807	0.880376	0.851564	0.795623	0.795623	0.767212	0.78543
8164428	TruB pseudouridine (psi) synthase homolog 2 (E. coli)	TRUB2	1.34815	1.23115	1.64847	1.36789	1.30342	1.38376	1.27525	1.29833	1.23624
7930703	TruB pseudouridine (psi) synthase homolog 1 (E. coli)	TRUB1	0.942871	0.748723	0.776526	0.661567	0.905328	1.02081	0.858064	0.907472	0.903401
7899486	tRNA selenocysteine associated protein 1	TRSPAP1	0.975154	1.39123	1.07407	0.922371	0.838723	0.954806	1.20051	1.29148	1.04847
8134470	transformation/transcription domain-associated protein	TRRAP	1.25626	1.47689	1.14972	1.13305	1.07297	1.11453	1.07892	1.12801	1.36113
8143499	transient receptor potential cation channel, subfamily V, member 6 /// solute carrier family 7 (cationic amino acid transporter, y+ system), member 6	TRPV6 /// SLC7A6	0.937486	0.832199	0.811688	0.898704	0.870066	0.967565	0.876502	0.873956	0.788315
8143518	transient receptor potential cation channel, subfamily V, member 5	TRPV5	1.33495	1.02183	0.887581	1.23034	0.820798	1.03019	1.02684	1.05117	0.706427
7966234	transient receptor potential cation channel, subfamily V, member 4	TRPV4	1.42625	1.34247	1.47967	1.51468	1.49326	1.46191	1.61145	1.44643	1.42397
8011354	transient receptor potential cation channel, subfamily V, member 3	TRPV3	0.818031	0.830558	1.00629	0.890715	0.992339	0.890715	0.98559	0.890715	0.890715
8005171	transient receptor potential cation channel, subfamily V, member 2	TRPV2	1.34921	1.26643	1.09735	1.09735	1.11165	1.32038	1.00852	1.00415	1.12253
8011375	transient receptor potential cation channel, subfamily V, member 1	TRPV1	1.58035	1.06043	1.80995	1.52916	1.79026	1.35503	1.3254	1.27369	1.26223
7949046	tRNA phosphotransferase 1	TRPT1	2.94297	3.14832	2.89924	2.59261	2.6258	2.55063	2.40495	2.797	2.797
8152453	trichorhinophalangeal syndrome I	TRPS1	0.948185	1.10619	0.978789	0.747388	1.03563	1.03101	0.978908	0.913935	0.943094
8049394	transient receptor potential cation channel, subfamily M, member 8	TRPM8	0.80008	0.811098	0.79538	0.914547	0.821869	0.951735	0.823467	0.94202	0.864352
7988713	transient receptor potential cation channel, subfamily M, member 7	TRPM7	0.799314	0.800781	0.755596	0.765651	0.801574	0.698051	0.765096	0.747766	0.765651
8161774	transient receptor potential cation channel, subfamily M, member 6	TRPM6	0.855653	0.9591	0.93476	0.849339	0.915116	0.911261	0.915116	1.00215	0.915116
7945742	transient receptor potential cation channel, subfamily M, member 5	TRPM5	1.5106	1.13281	0.818778	1.20302	1.22682	1.2034	1.11894	1.22337	1.13021
8030251	transient receptor potential cation channel, subfamily M, member 4	TRPM4	1.57599	1.3924	1.64861	1.45129	1.56832	1.5068	1.51836	1.57599	1.57599
8161654	transient receptor potential cation channel, subfamily M, member 3	TRPM3	0.950125	0.851564	0.881795	0.850438	0.851564	0.850438	0.891399	0.903596	0.850263
8069085	transient receptor potential cation channel, subfamily M, member 2	TRPM2	1.37622	1.59932	1.37622	1.29463	1.21386	1.37622	1.22856	1.47158	1.29285
7987068	transient receptor potential cation channel, subfamily M, member 1	TRPM1	0.942505	1.02206	1.0497	1.05492	1.12763	1.0497	1.07058	1.06553	1.0497
8114273	transient receptor potential cation channel, subfamily C, member 7	TRPC7	0.953265	0.774814	0.844029	0.769797	0.761545	0.689672	0.845021	0.893034	0.864179
7951178	transient receptor potential cation channel, subfamily C, member 6	TRPC6	0.935016	0.803617	0.811344	0.848216	0.914822	0.931228	0.762786	0.826363	0.856719
8174556	transient receptor potential cation channel, subfamily C, member 5	TRPC5	0.915168	0.770775	1.05595	1.25634	0.899826	1.06357	0.773465	0.782271	0.910549
8065832	transient receptor potential cation channel, subfamily C, member 4 associated protein	TRPC4AP	1.57239	1.5028	1.57239	1.30674	1.57239	1.58863	1.7859	1.37891	1.53241
7971104	transient receptor potential cation channel, subfamily C, member 4	TRPC4	0.706872	0.841906	0.841906	0.931552	0.890913	0.819913	0.772744	0.857731	0.81916
8102678	transient receptor potential cation channel, subfamily C, member 3	TRPC3	0.765469	0.899807	1.05148	0.775391	0.812281	0.882861	0.879537	0.879537	0.963096
7937878	transient receptor potential cation channel, subfamily C, member 2 (pseudogene)	TRPC2	1.0599	0.971435	1.09102	1.22457	0.823404	1.06623	1.06494	1.20468	0.817289
8083166	transient receptor potential cation channel, subfamily C, member 1	TRPC1	0.799121	0.794445	0.839161	0.929909	0.808031	0.989104	0.720679	0.718379	0.738869
8151341	transient receptor potential cation channel, subfamily A, member 1	TRPA1	0.756253	0.771276	0.756253	0.790942	0.756253	0.840719	0.756253	0.719788	0.849867
7908421	TROVE domain family, member 2	TROVE2	1.02612	0.897909	0.909726	1.10572	0.828783	0.733992	0.929814	0.931067	0.989174
7955195	trophinin associated protein (tastin)	TROAP	2.12032	1.87108	1.99589	2.31452	2.35679	2.34515	2.80576	2.32027	2.0622
8167835	trophinin	TRO	1.29649	1.37325	1.78998	1.3958	1.31693	1.82344	1.36597	1.35217	1.33365
8077353	tRNA nucleotidyl transferase, CCA-adding, 1	TRNT1	0.791405	0.754254	0.735015	0.715076	0.576146	0.675073	0.882258	0.710885	0.644251
8073875	tRNA 5-methylaminomethyl-2-thiouridylate methyltransferase	TRMU	1.04721	1.25218	1.13272	1.1032	0.770994	1.04574	1.12568	1.14089	1.06104
8064879	tRNA methyltransferase 6 homolog (S. cerevisiae)	TRMT6	1.09927	0.891522	0.91267	1.0191	0.886076	0.794786	1.01988	0.859765	0.91267
7979516	TRM5 tRNA methyltransferase 5 homolog (S. cerevisiae)	TRMT5	0.737157	0.910936	0.648524	0.726525	0.737157	0.958791	0.750096	0.595707	0.737157
8148263	tRNA methyltransferase 12 homolog (S. cerevisiae)	TRMT12	0.945754	1.30587	0.631502	0.93541	0.919028	1.04831	0.854454	0.976467	0.746478
8121895	tRNA methyltransferase 11 homolog (S. cerevisiae)	TRMT11	0.955089	0.898521	0.634801	0.738409	0.821721	0.696917	0.759652	0.850183	0.827507
8034615	TRM1 tRNA methyltransferase 1 homolog (S. cerevisiae)	TRMT1	1.5952	1.44079	1.44079	1.43968	1.37723	1.44079	1.44079	1.42182	1.44079
7915261	tRNA isopentenyltransferase 1	TRIT1	0.812013	1.25771	0.879085	1.35007	1.24041	1.01032	1.3297	0.982821	1.16667
8134981	thyroid hormone receptor interactor 6	TRIP6	2.14644	2.24964	2.27033	2.08123	2.28601	2.13248	1.99269	2.13248	2.19064
7984190	thyroid hormone receptor interactor 4	TRIP4	0.720238	0.849567	0.849567	0.928549	0.889833	0.966993	0.972963	0.849567	0.849567
8104234	thyroid hormone receptor interactor 13	TRIP13	0.991329	1.0221	0.809969	1.16255	1.26808	0.993792	1.19016	1.16917	1.27479
8059596	thyroid hormone receptor interactor 12	TRIP12	1.15092	0.701364	0.772416	0.919719	0.919719	0.919719	0.986817	0.919719	0.88809
7980923	thyroid hormone receptor interactor 11	TRIP11	0.741633	0.944535	0.617505	0.798139	0.614349	0.648407	0.880571	0.648351	0.723095
8025058	thyroid hormone receptor interactor 10	TRIP10	2.1036	2.3594	1.97067	1.90006	1.94094	2.28567	2.57032	2.26117	3.09674
8072894	TRIO and F-actin binding protein	TRIOBP	2.15736	1.75284	1.75898	1.77971	1.70011	1.58604	1.81428	1.79345	2.01743
8104506	triple functional domain (PTPRF interacting) /// hypothetical protein LOC100131749	TRIO /// LOC100131749	1.50378	1.47479	1.76727	1.32198	1.3817	1.24801	1.38746	1.22352	1.36844
8104107	tripartite motif family-like 2	TRIML2	0.810917	1.01198	0.875122	1.17853	1.03022	0.954819	1.04141	0.747594	0.994654
8098697	tripartite motif family-like 1	TRIML1	0.970893	0.715974	0.863348	0.867164	0.904233	0.867164	0.902916	0.858831	0.799151
7979108	tripartite motif-containing 9	TRIM9	0.788657	1.01048	1.04117	1.0586	1.01048	1.01048	1.01048	1.03596	1.01048
7930139	tripartite motif-containing 8	TRIM8	1.43449	1.66436	1.59251	1.63323	1.50176	1.32987	1.66436	1.38959	1.74285
8098175	tripartite motif-containing 75	TRIM75	0.672587	0.675566	0.831454	0.970343	0.78871	0.832237	0.814124	0.831454	0.843398
8133625	tripartite motif-containing 73 /// tripartite motif-containing 74	TRIM73 /// TRIM74	1.22414	1.37688	1.22414	1.27597	1.22414	1.31645	1.22414	1.22414	1.1315
8139966	tripartite motif-containing 73 /// tripartite motif-containing 74	TRIM73 /// TRIM74	1.23965	1.3924	1.23965	1.21515	1.23965	1.33197	1.23965	1.35071	1.14701
7995088	tripartite motif-containing 72	TRIM72	1.55769	1.59788	1.98314	1.76563	1.70328	1.37254	1.42354	1.67193	1.34387
8078435	tripartite motif-containing 71	TRIM71	2.63877	2.55031	2.64916	2.57988	2.55031	2.63859	2.79769	2.40665	2.55541
8116504	tripartite motif-containing 7	TRIM7	1.18082	1.04882	1.31504	1.43959	1.19245	1.0355	1.05934	1.23668	1.39631
7938012	TRIM6-TRIM34 /// tripartite motif-containing 6 /// tripartite motif-containing 34	TRIM6-TRIM34 /// TRIM6 /// TRIM34	0.863349	0.981984	0.654767	0.897434	0.763105	0.823427	0.744967	0.798108	0.798108
7983365	tripartite motif-containing 69	TRIM69	1.15047	1.02765	1.02765	1.08497	0.896663	1.02765	1.21237	1.01578	0.971513
7945979	tripartite motif-containing 68	TRIM68	0.96952	0.994654	1.00944	1.2851	0.851564	0.819557	0.936097	0.994654	0.994654
7910503	tripartite motif-containing 67	TRIM67	1.06786	1.32067	1.32067	1.32067	1.38407	1.40621	1.29724	1.21719	1.17301
7946380	tripartite motif-containing 66	TRIM66	1.02538	1.30753	1.24203	1.38018	1.31685	1.15006	1.22107	1.19919	1.22107
8018502	tripartite motif-containing 65	TRIM65	2.31448	2.17562	2.23902	2.17497	2.23902	2.23902	2.12563	2.37052	2.32277
7943031	tripartite motif-containing 64	TRIM64	1.00061	0.737258	0.592185	1.23402	0.7531	0.708675	0.735668	0.698869	0.601498
7950965	tripartite motif-containing 64	TRIM64	1.00061	0.737258	0.592185	1.23402	0.7531	0.708675	0.735668	0.698869	0.601498
7913907	tripartite motif-containing 63	TRIM63	0.946238	0.972968	0.946238	0.946238	0.930421	0.881215	0.946238	1.16197	1.0786
7914630	tripartite motif-containing 62	TRIM62	1.64137	1.53924	1.55405	1.52768	1.58053	1.8175	1.51579	1.58058	1.52145
8103520	tripartite motif-containing 61	TRIM61	0.939299	0.866587	2.24441	1.06382	0.994654	0.74941	0.942494	0.994654	0.994654
8098170	tripartite motif-containing 60	TRIM60	1.32812	1.07325	1.25609	1.11936	1.58441	1.13402	1.12081	1.43149	1.17405
8091757	tripartite motif-containing 59	TRIM59	0.756253	0.843189	0.621442	0.892834	0.621019	1.0034	0.594413	0.740973	0.756253
7911218	tripartite motif-containing 58 /// olfactory receptor, family 2, subfamily W, member 3	TRIM58 /// OR2W3	0.927811	1.01354	1.13469	1.05937	1.1294	1.0005	1.02727	0.988696	1.02727
8135064	tripartite motif-containing 56	TRIM56	1.39257	1.70829	2.06778	1.78223	1.72064	1.40914	2.09536	1.53786	1.57936
8146669	tripartite motif-containing 55	TRIM55	0.842297	1.09796	1.3919	1.23855	0.914068	1.21185	1.20375	1.1369	1.04874
8040898	tripartite motif-containing 54	TRIM54	1.01177	1.14352	1.0599	1.0599	1.0599	1.05093	1.0599	0.923314	1.0599
8116534	tripartite motif-containing 52	TRIM52	1.12351	1.21594	1.22498	1.62915	1.39439	1.31545	1.23816	1.23816	1.23816
8140028	tripartite motif-containing 50	TRIM50	1.04911	1.07391	1.51127	1.0555	1.58961	1.15207	1.30652	1.17062	1.14468
7946089	tripartite motif-containing 5	TRIM5	1.28557	1.23924	0.942661	1.34271	1.07696	0.926052	1.3446	1.00546	1.03224
7950955	tripartite motif-containing 49	TRIM49	0.977124	0.797337	0.977124	1.03179	1.03346	0.896192	1.17585	0.977124	1.12665
7943036	tripartite motif-containing 49	TRIM49	0.997232	0.698666	1.12761	0.968654	1.06578	0.849183	1.16821	0.929868	1.08689
7939884	tripartite motif-containing 49	TRIM49	0.767058	0.743701	0.904351	1.00029	1.01795	0.906807	1.02592	0.902695	0.950305
7943025	tripartite motif-containing 48 /// similar to Tripartite motif protein 49 (RING finger protein 18) (Testis-specific ring-finger protein)	TRIM48 /// LOC729384	1.0007	0.933104	1.19827	1.08048	0.837491	1.14395	1.01048	0.935238	1.01048
7950971	tripartite motif-containing 48 /// similar to Tripartite motif protein 49 (RING finger protein 18) (Testis-specific ring-finger protein)	TRIM48 /// LOC729384	1.0007	0.933104	1.19827	1.08048	0.837491	1.14395	1.01048	0.935238	1.01048
7939912	tripartite motif-containing 48	TRIM48	1.20741	0.763105	0.882982	0.943293	0.600829	0.871505	1.2462	1.16221	0.943293
8018494	tripartite motif-containing 47	TRIM47	2.27375	2.21718	2.6681	1.96004	2.01108	2.12517	2.30057	2.27375	2.42602
7905951	tripartite motif-containing 46	TRIM46	1.12901	1.32814	1.44359	1.4311	1.26743	1.13161	1.29713	1.20702	1.29713
7918925	tripartite motif-containing 45	TRIM45	1.11764	0.983775	0.870232	1.09892	0.999813	0.95942	0.935282	1.0056	0.900503
7939368	tripartite motif-containing 44	TRIM44	1.4309	1.58791	1.24208	1.57709	1.39566	1.38515	1.88277	1.90453	1.97985
8043574	tripartite motif-containing 43	TRIM43	0.943293	0.890715	0.890715	0.890715	1.02883	0.923325	0.890715	0.890715	0.847749
8053787	tripartite motif-containing 43	TRIM43	0.944206	0.906906	0.896851	0.930967	1.04879	0.917405	0.906906	0.906296	0.822317
8054041	tripartite motif-containing 43	TRIM43	0.739625	0.842642	0.666841	0.758953	0.806858	0.737064	1.06904	0.796916	0.812399
8083053	tripartite motif-containing 42	TRIM42	1.21149	0.75573	0.994654	0.994654	0.838765	0.911692	0.930049	1.11243	0.994654
8110649	tripartite motif-containing 41	TRIM41	1.07578	0.957682	0.976365	1.14061	1.03916	1.13236	1.13236	1.24341	1.13236
8177750	tripartite motif-containing 40	TRIM40	0.998177	0.874817	1.08055	0.886716	0.965557	0.97955	0.733777	1.29421	0.876956
8179060	tripartite motif-containing 40	TRIM40	0.998177	0.874817	1.08055	0.886716	0.965557	0.97955	0.733777	1.29421	0.876956
8117840	tripartite motif-containing 40	TRIM40	1.06285	0.907915	1.11323	0.945048	0.864683	0.992293	0.691573	1.24896	0.859673
8141363	tripartite motif-containing 4	TRIM4	0.851564	0.819887	0.934526	0.834234	0.737634	0.812136	0.851564	0.880185	0.930066
8117869	tripartite motif-containing 39 /// TRIM39-like protein	TRIM39 /// TRIM39R	0.959962	1.0071	0.915843	0.86909	1.08602	0.768197	1.15378	0.906066	0.853733
8177770	tripartite motif-containing 39 /// TRIM39-like protein	TRIM39 /// TRIM39R	0.959962	1.0071	0.915843	0.86909	1.08602	0.768197	1.15378	0.906066	0.853733
8179088	tripartite motif-containing 39 /// TRIM39-like protein	TRIM39 /// TRIM39R	0.959962	1.0071	0.915843	0.86909	1.08602	0.768197	1.15378	0.906066	0.853733
8117321	tripartite motif-containing 38	TRIM38	0.990349	0.907558	0.81757	1.20718	0.847277	0.833647	0.803343	0.797079	1.23636
8017106	tripartite motif-containing 37	TRIM37	0.818582	0.982351	0.83915	0.934906	0.942724	0.913479	1.0187	0.853924	0.842615
8113577	tripartite motif-containing 36	TRIM36	0.916728	0.83407	0.870583	0.905247	0.94891	0.867555	0.82307	0.899845	0.994968
8149907	tripartite motif-containing 35	TRIM35	1.42254	1.26905	1.82514	1.57599	1.31949	1.42254	1.39437	1.25521	1.53303
7918725	tripartite motif-containing 33	TRIM33	0.870869	0.93625	0.911477	0.871462	0.845227	0.866775	0.750686	0.870869	0.887535
8157516	tripartite motif-containing 32	TRIM32	0.928708	1.1137	0.789734	0.763794	0.964561	1.1171	0.901786	0.889089	0.954906
8178330	tripartite motif-containing 31	TRIM31	1.11839	0.649076	0.836402	0.790459	1.00036	0.943293	0.853323	1.21425	0.943293
8124707	tripartite motif-containing 31	TRIM31	1.40788	0.65271	0.888775	0.857645	1.0729	1.01048	1.01048	1.28144	1.01048
8179617	tripartite motif-containing 31	TRIM31	1.47338	0.652053	0.859185	0.856884	1.07224	0.942693	1.00982	1.34378	1.00982
7946180	tripartite motif-containing 3	TRIM3	1.1786	1.1786	1.20802	1.1786	1.27014	1.1786	1.01043	1.1786	1.1786
7952290	tripartite motif-containing 29	TRIM29	1.3173	1.25718	1.39165	1.31191	1.28648	1.64129	1.29652	1.53684	1.0407
8031913	tripartite motif-containing 28	TRIM28	3.52165	3.66493	3.52855	3.51376	3.54917	3.70222	4.43114	3.97598	4.40162
8124610	tripartite motif-containing 27	TRIM27	1.35505	1.22146	1.39237	1.21197	1.39403	1.57355	1.38452	1.33849	1.57499
8179575	tripartite motif-containing 27	TRIM27	1.35505	1.22146	1.39237	1.21197	1.39403	1.57355	1.38452	1.33849	1.57499
8179638	tripartite motif-containing 26	TRIM26	0.867663	1.11417	0.8708	1.06842	1.27689	1.00257	1.00257	0.987322	1.06184
8124726	tripartite motif-containing 26	TRIM26	0.966163	1.25711	0.969426	1.10121	1.28998	1.05112	1.03444	1.02011	1.15028
8016847	tripartite motif-containing 25	TRIM25	1.92012	2.04836	1.92012	2.04336	1.79073	1.92012	1.92012	2.02487	1.92012
8136473	tripartite motif-containing 24	TRIM24	0.963587	0.962185	0.902965	0.899686	0.808164	1.13149	0.901838	0.887148	1.15927
8112388	tripartite motif-containing 23	TRIM23	0.849486	0.813887	0.88246	0.888806	0.971634	0.873087	0.808031	0.941746	0.813887
7938035	tripartite motif-containing 22	TRIM22	0.905782	0.862088	0.772309	0.857947	0.797859	0.925439	0.928275	0.928884	0.895619
7945962	tripartite motif-containing 21	TRIM21	0.784771	1.13319	0.984533	0.937879	0.891733	0.791201	1.13046	0.915384	0.961962
8097841	tripartite motif-containing 2	TRIM2	0.837795	0.874299	0.874299	0.878088	0.852927	0.683723	0.874299	0.871722	0.932459
7924874	tripartite motif-containing 17	TRIM17	0.832203	1.17116	1.0783	1.00811	0.99453	0.863827	0.997152	0.888622	1.01096
8005475	tripartite motif-containing 16 /// tripartite motif-containing 16-like	TRIM16 /// TRIM16L	3.10993	2.99196	1.88992	1.71358	2.61057	2.20184	4.08594	3.70003	4.94277
8012953	tripartite motif-containing 16 /// CMT1A duplicated region transcript 1	TRIM16 /// CDRT1	3.18289	3.83581	3.43098	2.85925	2.92731	2.28463	3.0437	2.87208	3.03687
8117849	tripartite motif-containing 15	TRIM15	1.48222	1.1677	1.34269	1.31462	1.41524	1.22452	1.17177	1.20795	1.43221
8177760	tripartite motif-containing 15	TRIM15	1.48222	1.1677	1.34269	1.31462	1.41524	1.22452	1.17177	1.20795	1.43221
8179070	tripartite motif-containing 15	TRIM15	1.48222	1.1677	1.34269	1.31462	1.41524	1.22452	1.17177	1.20795	1.43221
8162729	tripartite motif-containing 14	TRIM14	2.94719	2.59314	2.96324	2.76695	2.77282	2.64238	2.90005	2.9167	3.67114
7924868	tripartite motif-containing 11	TRIM11	1.92853	1.96473	1.9069	2.33716	1.99397	1.55638	2.03775	2.07882	1.96796
8124716	tripartite motif-containing 10	TRIM10	1.22844	0.978747	1.10684	1.07571	1.06242	1.10254	1.03855	0.903507	1.06242
8179628	tripartite motif-containing 10	TRIM10	1.22844	0.978747	1.10684	1.07571	1.06242	1.10254	1.03855	0.903507	1.06242
8178338	tripartite motif-containing 10	TRIM10	1.4766	1.09846	1.41477	1.34382	1.36254	1.48996	1.34814	1.16124	1.18808
8060344	tribbles homolog 3 (Drosophila)	TRIB3	3.32314	2.77319	2.52092	1.74143	2.03073	1.91813	2.2902	2.27868	3.28761
8040365	tribbles homolog 2 (Drosophila)	TRIB2	1.58994	1.45484	1.19596	1.39179	1.85909	1.85473	1.54249	1.64049	2.66606
8148304	tribbles homolog 1 (Drosophila)	TRIB1	1.58377	2.31807	1.81188	1.30703	1.76971	1.66525	1.7183	2.05935	2.62257
7967056	TP53 regulated inhibitor of apoptosis 1	TRIAP1	1.07383	1.06836	1.1716	0.977102	1.08991	1.01965	0.913049	1.01103	1.13593
8147877	thyrotropin-releasing hormone receptor	TRHR	0.845803	0.770236	0.795801	0.772226	0.772226	0.86242	0.831122	0.772226	0.53813
7957221	thyrotropin-releasing hormone degrading enzyme	TRHDE	0.741644	0.890377	0.763105	0.927776	0.60419	0.918806	0.80073	0.763105	0.688656
8082574	thyrotropin-releasing hormone	TRH	1.74823	1.8044	1.67591	1.45709	1.88942	1.70041	1.71762	1.63278	1.65687
8139107	T cell receptor gamma variable 9	TRGV9	0.998503	1.04218	1.35346	1.43405	1.08946	0.818917	0.792311	0.887898	1.16665
8139113	T cell receptor gamma variable 7	TRGV7	1.10919	0.88671	1.17724	1.03027	0.942512	0.933544	0.975421	0.776425	0.868046
8139100	T cell receptor gamma constant 2 /// TCR gamma alternate reading frame protein /// T cell receptor gamma locus	TRGC2 /// TARP /// TRG@	0.729805	0.726365	0.800254	0.741412	0.68373	0.522721	0.597522	0.704298	0.572127
8175802	three prime repair exonuclease 2	TREX2	1.35057	1.59001	1.51106	1.53626	1.94768	1.50569	1.54409	1.54117	1.40025
8175808	three prime repair exonuclease 2	TREX2	1.36077	1.77651	1.43673	1.67083	2.70477	1.57893	1.76465	1.54151	1.50398
8079637	three prime repair exonuclease 1 /// ATR interacting protein	TREX1 /// ATRIP	1.1363	1.23358	1.2462	1.19637	1.82512	1.17596	1.2462	1.2462	1.2462
8126428	transcriptional regulating factor 1	TRERF1	0.900124	0.862287	0.930636	0.99999	0.862287	1.12024	0.751337	0.874063	0.864248
8126402	transcriptional regulating factor 1	TRERF1	1.10938	1.08623	1.15132	1.16473	0.961931	1.25528	1.08623	1.09801	1.08623
8119427	triggering receptor expressed on myeloid cells-like 4	TREML4	1.09683	1.25944	1.20339	1.50361	0.80749	0.891478	1.05453	1.18422	1.33764
8126296	triggering receptor expressed on myeloid cells-like 3	TREML3	1.23468	1.12161	1.48357	1.44625	1.33584	1.48891	1.356	1.39304	1.356
[truncated: 20,099 more rows]

## Sheet: Data from lysates
Probe Set ID	Gene Symbol	Gene Title	Ly-pre124-1_021009.rma-gene-default-Signal	Ly-pre124-2_021009.rma-gene-default-Signal	Ly-pre124-3_021009.rma-gene-default-Signal	Ly_pre128-1_022609.rma-gene-default-Signal	Ly_pre128-2_022609.rma-gene-default-Signal	Ly_pre128-3_022609.rma-gene-default-Signal	Ly-preneg-1_021009.rma-gene-default-Signal	Ly-preneg-2_021009.rma-gene-default-Signal	Ly-preneg-3_021009.rma-gene-default-Signal
7917103	ZZZ3	zinc finger, ZZ-type containing 3	6.44112	6.54263	6.12215	6.04168	5.9716	6.44112	6.35087	7.05796	6.60821
8011542	ZZEF1	zinc finger, ZZ-type with EF-hand domain 1	7.06498	6.83257	6.8338	6.728	6.68925	6.61892	6.82376	6.95257	6.94991
8136918	ZYX	zyxin	9.30803	9.22909	9.24991	9.05542	9.01308	9.02575	9.15995	9.13744	9.22913
7901479	ZYG11B	zyg-11 homolog B (C. elegans)	8.7613	8.83172	8.60001	8.36116	8.43969	8.54493	8.24137	8.5131	8.45014
7901497	ZYG11A	zyg-11 homolog A (C. elegans)	6.32873	6.23257	6.08899	6.31871	6.40282	6.35519	6.5869	6.74625	6.39762
8090351	ZXDC	ZXD family zinc finger C	7.67129	7.65517	7.71464	7.6727	7.65763	7.45617	7.57038	7.5528	7.62544
8167942	ZXDB	zinc finger, X-linked, duplicated B	7.62472	7.45508	7.51242	7.08251	7.61184	7.56281	7.66227	7.55271	7.65276
8173201	ZXDA	zinc finger, X-linked, duplicated A	8.26848	8.37093	8.6182	8.44629	8.54168	8.41587	8.27224	8.04728	8.41482
7933707	ZWINT	ZW10 interactor	5.6945	6.12699	5.91821	8.39775	8.53004	8.22338	8.69592	8.68837	8.36337
7984330	ZWILCH	Zwilch, kinetochore associated, homolog (Drosophila)	6.26556	6.10879	5.89051	6.65445	6.92614	6.92413	7.28934	7.78026	7.31083
7951734	ZW10	ZW10, kinetochore associated, homolog (Drosophila)	6.21734	6.33556	6.06031	6.44112	6.56895	6.53197	6.7914	7.32321	6.75856
8129108	ZUFSP	zinc finger with UFM1-specific peptidase domain	4.11734	4.30055	4.25294	4.05397	3.99968	4.155	4.24488	4.57067	4.2327
8105506	ZSWIM6	zinc finger, SWIM-type containing 6	9.08202	9.04973	8.93311	8.55093	8.59704	8.67674	8.61755	8.77468	8.7252
7915682	ZSWIM5	zinc finger, SWIM-type containing 5	7.15438	6.85001	7.18255	6.29905	6.33472	6.3372	6.60954	6.70017	6.76238
8026198	ZSWIM4	zinc finger, SWIM-type containing 4	7.73328	7.41967	7.65991	7.17816	7.21817	7.0078	7.06268	6.97982	7.03089
8063071	ZSWIM3	zinc finger, SWIM-type containing 3	5.73963	5.41063	5.68252	5.45466	5.66444	5.44343	5.40923	5.33299	5.44017
8057563	ZSWIM2	zinc finger, SWIM-type containing 2	2.69791	2.61316	2.6723	2.66099	2.61541	2.60767	2.58651	2.51214	2.61541
8063074	ZSWIM1	zinc finger, SWIM-type containing 1	7.52941	7.35267	7.29836	7.62295	7.73047	7.50862	7.6203	7.53344	7.56474
8039577	ZSCAN5	zinc finger and SCAN domain containing 5	6.67101	6.8783	6.79302	7.5335	7.45432	7.2763	6.68457	6.95376	6.7931
8031799	ZSCAN4	zinc finger and SCAN domain containing 4	2.9291	2.83015	2.89942	2.98938	2.72422	2.88967	2.74445	2.99204	2.80194
7988082	ZSCAN29	zinc finger and SCAN domain containing 29	7.54243	7.6065	7.4298	7.54516	7.65237	7.73226	7.6065	7.75255	7.68491
8124583	ZSCAN23	zinc finger and SCAN domain containing 23	4.44014	4.50409	4.39006	4.02974	4.12298	4.22244	4.19169	4.22301	4.45788
8031908	ZSCAN22	zinc finger and SCAN domain containing 22	5.43069	5.70385	5.66749	6.52953	6.41367	6.29422	6.08728	6.13126	6.24396
8134689	ZSCAN21	zinc finger and SCAN domain containing 21	7.16085	7.06048	7.25273	7.04298	6.97771	7.04298	7.04298	7.04298	7.09476
7899884	ZSCAN20	zinc finger and SCAN domain containing 20	6.28067	6.37886	6.24452	6.63176	6.77622	6.57555	6.46752	6.28113	6.37504
7985577	ZSCAN2	zinc finger and SCAN domain containing 2	6.39593	6.32385	6.27948	6.28131	6.26575	6.14256	6.29557	6.25559	6.47389
8039730	ZSCAN18	zinc finger and SCAN domain containing 18	6.59009	6.66256	6.99846	6.50318	6.49427	6.42541	6.51733	6.40442	6.37846
8117640	ZSCAN16	zinc finger and SCAN domain containing 16	5.3808	5.40433	5.12745	4.62364	4.97148	5.0072	5.25003	5.41391	5.17118
8124574	ZSCAN12	zinc finger and SCAN domain containing 12	4.70674	4.8644	4.7364	4.93408	5.03261	5.06878	4.96717	5.62344	5.38291
7998921	ZSCAN10	zinc finger and SCAN domain containing 10	5.30915	5.42816	5.51605	5.2808	5.30915	5.30915	5.29861	5.12511	5.29535
8031847	ZSCAN1	zinc finger and SCAN domain containing 1	6.4722	6.42445	6.54876	6.35298	6.38058	6.38741	6.38264	6.25488	6.27034
8166195	ZRSR2	zinc finger (CCCH type), RNA-binding motif and serine/arginine rich 2	6.41665	6.56257	6.67129	6.75923	6.55391	6.61022	6.38309	6.38008	6.51599
8107353	ZRSR1	zinc finger (CCCH type), RNA-binding motif and serine/arginine rich 1	6.26043	6.03547	5.73356	6.45407	6.43156	6.69028	6.59643	6.72954	6.74127
8141898	ZRF1	zuotin related factor 1	5.16421	5.23421	5.07603	5.08059	5.19777	5.18111	5.33098	5.65804	5.19777
8086008	ZRANB3 /// DYNC1LI1	zinc finger, RAN-binding domain containing 3 /// dynein, cytoplasmic 1, light intermediate chain 1	7.33608	7.33886	7.16629	7.16649	7.34692	7.33886	7.24527	7.52968	7.40561
8055377	ZRANB3	zinc finger, RAN-binding domain containing 3	3.55879	3.73561	3.73561	3.86813	4.04188	3.76924	3.86593	4.04387	3.74232
7916969	ZRANB2	zinc finger, RAN-binding domain containing 2	7.99144	8.30002	7.90322	7.64207	7.72416	8.06086	8.04679	8.65173	8.20476
7931226	ZRANB1	zinc finger, RAN-binding domain containing 1	9.42079	9.51336	9.28574	9.04589	8.97426	9.13683	8.53325	8.8938	9.02968
8081407	ZPLD1	zona pellucida-like domain containing 1	4.42152	4.16895	4.37894	4.19372	4.14133	4.18402	4.12387	4.20413	4.08657
8006958	ZPBP2	zona pellucida binding protein 2	3.17801	3.13486	2.99709	3.07706	3.03077	2.79525	2.92559	2.7887	2.92125
8139622	ZPBP	zona pellucida binding protein	3.05713	2.97632	2.78804	3.16154	2.8729	3.00082	2.94205	3.02455	2.87034
7925419	ZP4	zona pellucida glycoprotein 4	4.00762	4.04595	4.36395	4.11409	4.01039	3.89506	3.79157	3.8531	4.11121
8133728	ZP3	zona pellucida glycoprotein 3 (sperm receptor)	3.62245	4.74868	4.2524	4.63974	5.12845	4.84613	4.85771	4.73471	4.81872
8000097	ZP2	zona pellucida glycoprotein 2 (sperm receptor)	3.82039	3.54545	3.8591	3.71108	3.83119	3.82039	3.7516	3.51878	3.79489
7940358	ZP1	zona pellucida glycoprotein 1 (sperm receptor)	4.91566	4.69308	4.98232	4.84889	5.03062	4.84785	4.96979	4.86292	4.93815
8024934	ZNRF4	zinc and ring finger 4	4.89795	4.92665	5.3711	4.92506	5.06094	4.99085	4.85897	4.55845	4.79231
8072160	ZNRF3	zinc and ring finger 3	6.87375	6.8177	7.09368	6.89535	7.01544	6.8762	6.69889	6.62007	6.84351
8132062	ZNRF2	zinc and ring finger 2	9.17489	9.25602	9.22413	9.41826	9.21444	9.43116	9.03414	9.05863	9.11163
7997247	ZNRF1	zinc and ring finger 1	6.90682	6.65076	6.72193	6.85704	6.88459	6.81852	6.90596	6.88486	7.11336
8179055	ZNRD1	zinc ribbon domain containing 1	6.76567	6.53153	6.55387	7.28027	7.37351	7.1252	7.73872	7.78631	7.75287
8117822	ZNRD1	zinc ribbon domain containing 1	4.94412	4.66027	4.7197	5.26905	5.40446	5.21567	5.43143	5.65205	5.80413
8042859	ZNHIT4 /// WBP1	zinc finger, HIT type 4 /// WW domain binding protein 1	7.34833	7.18039	7.34183	7.07136	7.36557	7.25361	7.40475	7.23541	7.38159
8006627	ZNHIT3	zinc finger, HIT type 3	8.29319	8.18459	8.1649	7.95092	8.06226	7.98853	8.32443	8.23131	8.24265
7949373	ZNHIT2	zinc finger, HIT type 2	6.48794	6.61012	6.99142	6.69724	6.64896	6.62947	6.61012	6.40329	6.3065
8135089	ZNHIT1	zinc finger, HIT type 1	6.47503	6.41881	6.57688	6.31181	6.19689	6.12868	6.47503	6.48766	6.40048
8066905	ZNFX1	zinc finger, NFX1-type containing 1	8.63824	8.35445	8.26267	9.3553	9.27333	9.1715	8.63824	8.63609	8.78143
8035836	ZNF99	zinc finger protein 99	2.72034	2.5098	2.60265	2.55869	2.54991	2.64976	2.60738	2.71103	2.83456
8027247	ZNF93	zinc finger protein 93	3.11726	3.03115	3.10499	3.26825	3.09948	3.54518	3.52115	3.56863	3.28595
8133089	ZNF92	zinc finger protein 92	3.75756	3.87824	3.67424	3.69119	3.75756	3.79076	4.10862	3.80727	3.8061
8035842	ZNF91	zinc finger protein 91	4.68333	4.92304	4.43943	4.18126	4.52638	4.40918	4.41203	4.957	4.28107
8027254	ZNF90	zinc finger protein 90	4.60707	4.76057	4.35046	4.77954	4.74311	4.86628	5.79683	5.52244	5.41496
8027272	ZNF85	zinc finger protein 85	5.25714	5.32429	5.2193	5.56752	5.41479	5.69461	6.02081	6.01751	5.75758
7960143	ZNF84	zinc finger protein 84	5.20621	5.29142	5.20621	5.34846	5.34882	5.35007	5.03944	5.39007	5.23068
8063723	ZNF831	zinc finger protein 831	4.91547	4.46173	4.94991	5.09903	4.97796	4.95117	4.96577	4.55371	4.73544
8006477	ZNF830	zinc finger protein 830	6.69333	6.7251	6.3216	6.63059	6.81204	6.75083	6.8712	7.22027	6.86153
8038967	ZNF83	zinc finger protein 83	6.21905	6.86536	6.13089	6.64856	6.3618	6.94601	6.53528	6.88047	6.99893
8036365	ZNF829	zinc finger protein 829	3.34294	3.77721	3.60771	3.64756	3.83907	3.84999	3.68344	3.62682	3.44818
7970376	ZNF828	zinc finger protein 828	6.27168	6.35834	6.26575	6.37603	6.56546	6.37006	6.415	6.67486	6.407
8103025	ZNF827	zinc finger protein 827	7.68235	7.6863	7.54535	7.58371	7.66931	7.553	7.41275	7.44808	7.47432
8035789	ZNF826 /// ZNF737	zinc finger protein 826 /// zinc finger protein 737	3.75973	3.94808	3.18257	3.4717	3.55031	3.42459	3.96647	3.85111	3.44448
8034315	ZNF823	zinc finger protein 823	4.29421	4.34539	4.44685	4.33604	4.54377	4.53096	4.66151	4.67677	4.41251
8002618	ZNF821	zinc finger protein 821	5.43947	5.55723	5.31318	5.6448	5.62706	5.65836	5.53313	5.41648	5.42694
8030969	ZNF818	zinc finger protein 818	3.18404	3.05764	3.1238	3.11779	3.10945	2.91929	3.09868	3.05764	3.07922
8039017	ZNF816A /// ZNF321	zinc finger protein 816A /// zinc finger protein 321	4.9268	5.53654	5.30323	5.1032	4.60022	5.30335	5.24908	5.84504	5.3656
8030980	ZNF813 /// ZNF525	zinc finger protein 813 /// zinc finger protein 525	8.87567	9.56522	9.23925	8.7387	8.56671	9.01654	9.26884	9.61315	9.35434
8030997	ZNF813	zinc finger protein 813	4.18757	4.57501	4.40843	4.40945	4.40843	4.52459	4.63735	4.81414	4.46203
8167201	ZNF81	zinc finger protein 81	5.14314	5.0766	5.26335	5.61186	5.06349	5.36303	5.22808	5.2368	5.03878
8030946	ZNF808	zinc finger protein 808	7.91218	8.44278	7.92132	6.86262	7.12832	7.15002	7.1926	7.71748	7.33584
8031712	ZNF805	zinc finger protein 805	7.30725	7.07528	6.99711	6.50498	6.60435	6.42089	6.74698	7.32755	7.07733
8134018	ZNF804B	zinc finger protein 804B	3.36767	3.48303	3.68583	3.4448	3.46335	3.38751	3.28588	3.35909	3.52481
8046815	ZNF804A	zinc finger protein 804A	5.59707	5.4915	5.48548	5.39128	5.33976	5.27287	4.98023	5.19269	5.32548
8142730	ZNF800	zinc finger protein 800	7.21565	7.38289	7.44127	7.21667	7.37266	7.35413	7.18468	7.34402	7.26931
8089694	ZNF80	zinc finger protein 80	3.49676	3.50501	3.58293	3.67409	3.58293	3.58293	3.48353	3.58293	3.58293
8031893	ZNF8	zinc finger protein 8	8.00558	7.93316	7.90596	7.39202	7.48493	7.37401	7.73776	7.89023	7.98437
8034390	ZNF799	zinc finger protein 799	4.91653	4.5529	4.88617	4.52221	4.82767	4.64308	5.22196	5.58328	4.46966
8028254	ZNF793	zinc finger protein 793	5.6723	5.08652	5.35929	5.02824	5.11219	5.17512	5.1945	5.51473	5.08244
8036045	ZNF792	zinc finger protein 792	6.7391	6.55689	6.14987	6.13482	6.22508	5.82745	6.45755	6.44817	6.26024
8026007	ZNF791	zinc finger protein 791	6.61298	6.6055	6.26475	6.52293	6.48877	6.51334	6.32461	6.679	6.5534
8036357	ZNF790	zinc finger protein 790	3.53372	3.29661	3.30284	3.05758	3.04084	3.21473	3.49951	3.09505	3.12971
8158022	ZNF79	zinc finger protein 79	6.54777	6.45977	6.50715	6.535	6.64173	6.45977	6.58708	6.67232	6.48958
8134613	ZNF789	zinc finger protein 789	5.80757	5.51744	5.56959	5.43352	5.51744	5.41559	5.62226	5.51744	5.53527
8025992	ZNF788	zinc finger family member 788	4.93766	5.03634	4.78729	5.06979	5.13649	5.45744	5.07125	5.45459	5.067
8039569	ZNF787	zinc finger protein 787	8.31627	8.29147	8.39658	8.26577	8.26689	8.30191	8.26689	8.10366	8.22091
8143697	ZNF786	zinc finger protein 786	6.30864	6.19165	6.15231	6.23325	6.21553	6.09604	6.2243	6.16289	6.2765
8000917	ZNF785 /// ZNF688	zinc finger protein 785 /// zinc finger protein 688	6.27472	6.41991	6.70441	6.62996	6.68535	6.55905	6.46504	6.48245	6.57598
8039530	ZNF784	zinc finger protein 784	7.3513	7.43515	7.60906	7.55442	7.45141	7.51396	7.42648	7.21909	7.43657
8162639	ZNF782	zinc finger protein 782	3.93788	3.31058	3.60631	3.30911	3.19101	3.59774	3.42145	3.70165	3.41131
8036430	ZNF781	zinc finger protein 781	2.67454	2.65799	2.65317	2.67454	2.67454	2.65593	2.53932	2.56826	2.68237
8036813	ZNF780B	zinc finger protein 780B	5.67022	5.26608	5.25583	4.5702	4.33091	4.80112	5.21059	5.85766	5.32053
8036820	ZNF780A	zinc finger protein 780A	4.60623	4.71573	4.85193	4.80899	4.49498	4.64591	4.45019	4.61086	4.58208
7997896	ZNF778	zinc finger protein 778	6.5833	6.34484	6.0341	6.04961	6.30373	6.39711	6.61074	6.47549	6.37039
8143714	ZNF777	zinc finger protein 777	7.37402	7.46887	7.45337	7.34625	7.19982	7.23434	7.43767	7.56478	7.44092
8137228	ZNF775	zinc finger protein 775	7.85155	7.84577	8.14796	7.696	7.73815	7.7677	7.73564	7.4791	7.50955
7986004	ZNF774	zinc finger protein 774	5.71455	5.53315	5.44327	5.53705	5.45882	5.50657	5.82669	5.42723	5.89235
8031759	ZNF773	zinc finger protein 773	7.30743	7.36862	7.07266	7.07371	7.39046	7.47858	7.38217	7.62842	7.61093
8039645	ZNF772	zinc finger protein 772	7.1004	6.78165	6.5628	6.25249	6.1165	6.35415	6.7725	6.87099	6.97305
7994817	ZNF771	zinc finger protein 771	6.72369	6.81252	6.87316	6.74533	6.8049	6.62343	6.39535	6.3125	6.24146
7982527	ZNF770	zinc finger protein 770	3.20424	3.09243	3.36646	3.04121	3.3	3.11637	2.80146	3.12323	3.04855
7987361	ZNF770	zinc finger protein 770	6.01663	6.39258	5.77853	6.06086	5.70611	6.14288	5.67181	6.35043	5.97945
8032544	ZNF77	zinc finger protein 77	5.90672	5.54645	5.49578	5.38114	5.62638	5.71592	5.63401	5.34722	5.57455
8000899	ZNF768	zinc finger protein 768	8.54205	8.52002	8.4405	8.63268	8.65415	8.51344	8.29073	8.17433	8.31629
8143733	ZNF767	zinc finger family member 767	6.44297	6.08242	6.25726	6.02264	5.87063	5.64286	6.30333	6.39755	6.39952
8030899	ZNF766	zinc finger protein 766	5.94974	6.24391	5.52783	5.94409	5.77363	6.38511	5.86453	6.38539	6.28955
8030982	ZNF765 /// ZNF813	zinc finger protein 765 /// zinc finger protein 813	7.31161	7.41361	7.31782	7.21328	7.24651	7.45408	7.42189	7.55938	7.4693
8000906	ZNF764	zinc finger protein 764	7.37232	7.31205	7.37091	7.51793	7.2761	7.25249	7.14985	6.91219	7.30581
8025978	ZNF763	zinc finger protein 763	3.04325	3.12837	2.9039	3.03864	3.03864	3.0355	2.9747	3.19745	3.49453
8030993	ZNF761	zinc finger protein 761	5.73179	5.90055	5.39895	5.48141	5.50093	5.74814	6.17978	6.65567	6.13146
8118915	ZNF76	zinc finger protein 76 (expressed in testis)	7.58836	7.59738	7.55687	7.65878	7.53872	7.47659	7.31663	7.25573	7.37413
7992877	ZNF75A /// LOC100128510	zinc finger protein 75a /// hypothetical protein LOC100128510	5.87825	5.77142	5.55165	5.87671	5.91944	5.77876	5.75907	6.40059	6.02788
7992887	ZNF75A /// LOC100128510	zinc finger protein 75a /// hypothetical protein LOC100128510	5.51962	5.56798	5.14001	4.98375	4.87412	5.25673	5.46832	5.74719	5.33036
8019541	ZNF750	zinc finger protein 750	3.65539	3.61073	3.97254	3.76974	3.69457	3.74207	3.75756	3.66913	3.75756
8175319	ZNF75	zinc finger protein 75 (D8C6)	5.83594	5.98714	5.6623	5.97996	5.73322	5.75857	5.6623	5.72712	5.53966
8031748	ZNF749 /// LOC100133484 /// LOC100133583 /// LOC100133661 /// LOC100133811 /// HLA-DQB1 /// HLA-DQB2 /// HLA-DRB1 /// HLA-DRB2 /// HLA-DRB3 /// HLA-DRB4 /// HLA-DRB5 /// RNASE2 /// LOC730415 /// hCG_1998957	zinc finger protein 749 /// similar to Major histocompatibility complex, class II, DR beta 4 /// similar to major histocompatibility complex, class II, DQ beta 1 /// similar to HLA class II histocompatibility antigen, DR-W53 beta chain /// similar to hCG1992647 /// major histocompatibility complex, class II, DQ beta 1 /// major histocompatibility complex, class II, DQ beta 2 /// major histocompat…	5.13403	5.25271	4.32924	5.4657	5.49406	5.81447	5.20812	5.77049	5.49658
8000903	ZNF747	zinc finger protein 747	7.87346	7.87668	8.02332	7.97236	8.03809	7.92823	7.88984	7.60796	7.79148
8143725	ZNF746	zinc finger protein 746	9.24144	9.18385	9.18875	9.24081	9.2116	9.24188	9.36633	9.27077	9.31521
7955721	ZNF740	zinc finger protein 740	8.32683	8.2492	8.18505	8.36003	8.33516	8.31104	8.26553	8.35812	8.39514
8071382	ZNF74	zinc finger protein 74	7.44552	7.40949	7.58326	7.41028	7.39903	7.36667	7.47547	7.31749	7.4092
8027297	ZNF738	zinc finger protein 738	6.15817	6.43777	6.1907	5.9112	5.98839	5.94249	6.79789	7.21313	6.71145
7995252	ZNF720	zinc finger protein 720	7.71277	7.53103	7.43383	6.59818	7.18741	6.98742	7.29115	7.72741	7.36058
8093320	ZNF718 /// ZNF595	zinc finger protein 718 /// zinc finger protein 595	3.5123	3.69026	3.67687	3.5511	3.61427	3.48589	3.87639	3.87753	3.74144
8088911	ZNF717	zinc finger protein 717	7.16792	6.81876	6.90559	6.996	6.92953	6.78427	6.96939	7.12859	7.35324
8133018	ZNF716	zinc finger protein 716	4.48527	4.22222	3.99281	4.46058	4.36141	4.48354	4.10363	4.14842	4.2324
8027285	ZNF714	zinc finger protein 714	4.00776	4.02837	3.86765	4.02837	4.06674	3.99673	4.2655	4.10025	4.13855
8132917	ZNF713	zinc finger protein 713	3.86833	4.27346	4.34002	4.52462	4.61239	4.61237	3.97083	4.31639	4.19898
8168589	ZNF711	zinc finger protein 711	4.98829	5.17305	5.17566	5.3377	4.8328	5.46542	5.3823	5.53098	5.68649
7985924	ZNF710	zinc finger protein 710	7.0684	7.08355	7.03597	7.06207	7.35946	7.25534	7.14315	7.04412	7.06111
8031675	ZNF71	zinc finger protein 71	7.23682	7.13544	7.31283	7.3124	7.36434	7.17896	7.51652	7.34776	7.43654
8034395	ZNF709 /// ZNF564	zinc finger protein 709 /// zinc finger protein 564	3.31238	3.30142	2.91143	3.37896	3.44656	3.41076	2.9392	3.29872	3.20239
8035803	ZNF708	zinc finger protein 708	3.6151	3.76109	3.60806	3.63073	3.63073	3.75298	3.86531	4.0396	3.86111
8148662	ZNF707	zinc finger protein 707	6.12319	6.07151	6.12319	6.27247	6.12319	6.11593	6.12319	6.07171	6.12319
8152111	ZNF706	zinc finger protein 706	6.91922	7.01236	6.3295	6.29093	6.28008	6.17137	6.34948	6.44393	6.4093
7953733	ZNF705A	zinc finger protein 705A	2.89256	2.30429	2.58996	2.58862	2.8149	2.51098	2.64781	2.43279	2.56907
8151496	ZNF704	zinc finger protein 704	6.0784	5.95395	6.08991	5.67676	5.94986	6.08284	5.67676	5.67348	5.79647
8145829	ZNF703	zinc finger protein 703	7.62023	7.62913	7.73833	7.26941	7.26483	7.2853	7.2346	7.10498	7.10409
8039025	ZNF702	zinc finger protein 702	4.85568	4.82493	4.24126	4.10865	4.32216	4.49883	4.25223	4.76659	4.34233
8030950	ZNF701	zinc finger protein 701	5.50967	5.08949	5.04533	4.79435	5.06502	5.14616	5.10181	5.73663	5.27751
8025973	ZNF700	zinc finger protein 700	5.46605	6.0696	5.44875	5.45053	5.74127	5.48514	5.94919	6.54747	5.88082
8074931	ZNF70	zinc finger protein 70	6.85316	6.68497	6.65791	6.87213	6.84995	6.87556	7.00996	6.94759	7.02249
8148941	ZNF7	zinc finger protein 7	6.88094	6.94457	6.99837	6.81999	6.95752	6.95507	7.01013	7.15359	7.16086
8033746	ZNF699	zinc finger protein 699	4.709	4.33265	3.97038	4.1287	4.05247	4.43877	4.22636	4.83359	4.31561
7919051	ZNF697	zinc finger protein 697	6.35178	6.62492	6.78415	6.46884	6.55115	6.50885	6.9206	6.51162	6.71229
8148615	ZNF696	zinc finger protein 696	5.94732	6.17333	6.54643	6.10948	6.10948	6.08591	6.1764	5.63613	6.05614
7925662	ZNF695	zinc finger protein 695	4.0551	3.96707	3.93269	4.262	4.24213	4.23368	4.97972	4.7974	4.78069
7925773	ZNF692	zinc finger protein 692	7.11699	7.11021	6.86644	7.04427	7.17272	7.02011	7.16364	7.05144	7.23337
7900624	ZNF691	zinc finger protein 691	6.95885	7.11527	6.75172	6.90774	7.11003	6.94849	6.93539	7.17511	7.07346
8025968	ZNF69	zinc finger protein 69	5.72678	5.90787	6.18685	5.97834	5.88904	6.1084	5.69103	5.78329	6.17375
8000924	ZNF689	zinc finger protein 689	7.43384	7.45695	7.54009	7.89593	7.86488	7.56311	7.68961	7.49332	7.66373
8000910	ZNF688	zinc finger protein 688	6.36302	6.2002	6.33245	6.57907	6.7992	6.74018	6.27672	6.24099	6.51081
7905382	ZNF687	zinc finger protein 687	7.99883	7.83256	7.82526	8.13302	8.19156	8.12884	7.87262	7.77388	7.87929
7900461	ZNF684	zinc finger protein 684	3.3434	3.3434	3.41978	3.08676	3.46743	3.33512	3.37486	3.86845	3.3434
7913965	ZNF683	zinc finger protein 683	5.77138	5.48235	5.66437	5.66897	5.53387	5.70427	5.67145	5.35385	5.67145
8035782	ZNF682	zinc finger protein 682	3.41877	3.93411	4.10739	4.21453	3.93035	3.87978	3.94578	4.30332	4.41829
8035855	ZNF681	zinc finger protein 681	3.37185	3.33709	3.02248	3.38015	3.47076	3.41535	3.54146	4.00264	4.28343
8139820	ZNF680	zinc finger protein 680	5.27808	5.38114	4.67262	5.25129	5.23478	5.38215	5.65513	6.02316	5.51627
8133042	ZNF679	zinc finger protein 679	3.88217	3.96902	4.18906	3.87098	3.79981	3.84093	3.96179	3.86077	3.66379
7910190	ZNF678	zinc finger protein 678	3.68234	3.92507	4.13707	3.93171	3.88885	4.23824	3.99915	4.37728	4.12523
8039070	ZNF677	zinc finger protein 677	3.06564	2.86839	3.07987	3.01852	2.90937	2.76994	2.83961	3.03024	3.02371
8035825	ZNF676	zinc finger protein 676	2.84577	3.42463	2.90313	2.7434	2.86207	2.64747	3.20796	2.89596	3.02983
8035847	ZNF675	zinc finger protein 675	4.2303	4.74649	3.93241	3.99995	3.88155	4.20692	4.79924	4.70605	4.26161
8172274	ZNF674	zinc finger protein 674	3.99027	3.6731	3.84236	3.58964	3.74607	4.19298	4.1709	4.26931	4.23942
8166989	ZNF673	zinc finger protein 673	6.47551	6.60768	6.31378	6.23002	6.00103	6.22109	6.49229	6.92781	6.74849
7911289	ZNF672	zinc finger protein 672	7.8879	7.87866	7.95166	7.6793	7.74083	7.4505	7.7469	7.50683	7.76966
8039680	ZNF671	zinc finger protein 671	5.29988	5.32953	5.61784	5.40856	5.1612	5.45664	5.32953	4.90198	5.32953
7925672	ZNF670	zinc finger protein 670	5.35391	5.49372	5.32005	6.11329	6.31337	6.1891	6.1014	6.83494	6.0809
7925677	ZNF669	zinc finger protein 669	6.63887	6.6321	6.4303	6.22144	6.37114	6.4482	6.55171	6.77879	6.61164
7995030	ZNF668	zinc finger protein 668	5.73574	5.87767	5.73455	5.91035	5.52251	5.66571	5.77033	5.49313	5.78906
8000974	ZNF668	zinc finger protein 668	7.13485	7.08112	7.07146	7.02821	6.83052	6.94248	6.59625	6.89666	6.58878
8039593	ZNF667	zinc finger protein 667	5.77432	5.79244	5.72966	5.61677	5.84817	5.79001	5.38056	5.58331	5.48245
8039062	ZNF665	zinc finger protein 665	3.38894	2.95411	2.81459	2.85158	2.93504	2.95411	2.96676	3.20407	2.88388
7959751	ZNF664	zinc finger protein 664	8.24196	8.32072	8.07551	7.91979	7.82717	8.07177	7.97773	8.00497	8.03979
8066739	ZNF663	zinc finger protein 663	3.52778	3.51242	3.63694	3.51911	3.53492	3.28706	3.31276	3.21687	3.55942
8079124	ZNF662	zinc finger protein 662	4.58361	4.36574	4.59424	4.34621	4.2292	4.36574	4.29079	4.10452	4.3578
8079198	ZNF660	zinc finger protein 660	2.6421	2.70596	2.70876	2.57387	2.54583	2.60776	2.6421	2.44385	2.48278
8027268	ZNF66	zinc finger protein 66	5.20435	5.05143	5.62538	5.79112	5.6648	5.12278	5.83823	6.04784	5.83578
8161346	ZNF658 /// ZNF658B /// LOC653501	zinc finger protein 658 /// zinc finger protein 658B /// zinc finger protein 658 pseudogene	4.14895	4.39758	4.26326	4.09041	4.076	4.1254	4.03614	4.15543	4.11028
8161319	ZNF658 /// ZNF658B /// LOC653501	zinc finger protein 658 /// zinc finger protein 658B /// zinc finger protein 658 pseudogene	4.18461	4.44071	4.28552	4.12539	4.12391	4.16189	4.07951	4.24364	4.13566
8161326	ZNF658 /// ZNF658B /// LOC653501	zinc finger protein 658 /// zinc finger protein 658B /// zinc finger protein 658 pseudogene	4.25123	4.48506	4.31054	4.18021	4.1837	4.18387	4.10598	4.22574	4.19964
8134631	ZNF655	zinc finger protein 655	7.35601	7.45184	7.31454	6.8628	6.78862	6.86547	7.38037	7.54926	7.35874
8081069	ZNF654	zinc finger protein 654	4.21312	5.09092	4.42034	4.91162	4.85857	4.60221	4.6732	5.59017	5.01126
8034276	ZNF653	zinc finger protein 653	7.40149	7.21015	7.31839	7.38625	7.22182	7.16954	6.82326	6.87301	7.15852
8016546	ZNF652	zinc finger protein 652	8.06476	8.2592	7.62939	6.73644	6.61074	6.93771	7.77114	8.1026	7.96192
8038913	ZNF649	zinc finger protein 649	5.7366	5.90181	5.16404	5.83778	6.15116	5.83778	6.27242	6.41648	6.0172
7922686	ZNF648	zinc finger protein 648	4.90077	4.50421	4.6502	4.49915	4.50421	4.5058	4.50421	4.2542	4.54747
7995033	ZNF646	zinc finger protein 646	6.73891	6.70888	6.47785	6.84264	6.82185	6.69381	6.74643	6.57388	6.97773
8166433	ZNF645	zinc finger protein 645	3.52927	3.65474	3.8512	3.48303	3.80324	3.65474	3.8526	3.48159	3.83915
7917604	ZNF644	zinc finger protein 644	5.32368	5.69805	5.22357	5.19835	4.88813	5.13279	4.59192	4.92402	4.92953
7900438	ZNF643	zinc finger protein 643	4.76864	4.96346	4.32856	4.89739	4.93674	4.84282	4.85595	5.20572	5.17829
7900446	ZNF642	zinc finger protein 642	5.22365	5.22365	5.22365	5.2596	5.05355	5.12971	5.34778	5.52168	5.24988
7962794	ZNF641	zinc finger protein 641	6.58886	6.62795	6.47683	6.41739	6.36293	6.2318	6.26261	6.13476	6.15853
8084035	ZNF639	zinc finger protein 639	6.83507	7.3921	6.94012	6.69674	6.71485	7.0671	7.1342	7.29813	7.10961
8042601	ZNF638	zinc finger protein 638	5.75763	6.28062	5.76333	5.77457	5.68326	5.63976	5.80772	6.17448	5.74002
8172379	ZNF630 /// ZNF182	zinc finger protein 630 /// zinc finger protein 182	5.99078	5.88752	5.64949	6.36985	6.48041	6.17459	6.19345	6.49115	6.46894
8000941	ZNF629	zinc finger protein 629	6.64563	6.70052	6.89894	6.64563	6.47801	6.5625	6.60097	6.50983	6.70052
8031489	ZNF628	zinc finger protein 628	6.87228	6.93257	7.04181	6.87228	6.80137	6.9474	6.98348	6.73071	6.87228
8025927	ZNF627	zinc finger protein 627	7.00301	6.83105	6.7061	6.68236	6.56161	6.72614	6.59981	6.89586	6.58751
8035795	ZNF626	zinc finger protein 626	6.24867	6.31682	5.70387	5.15713	5.65441	5.55768	6.01805	6.04601	6.04078
8013035	ZNF624	zinc finger protein 624	4.28837	4.19584	4.36765	4.15779	4.18064	4.23692	4.03413	4.10308	4.28118
8148658	ZNF623	zinc finger protein 623	7.79413	7.61031	7.5519	7.71684	7.82061	7.80219	7.68808	7.85507	7.83963
8111129	ZNF622	zinc finger protein 622	7.95614	7.7782	7.80775	7.91978	7.95469	7.83526	7.86507	7.88156	7.66761
8079005	ZNF621	zinc finger protein 621	5.84981	5.91242	5.96222	5.94458	6.08452	6.18207	5.96398	6.29963	6.08447
8078999	ZNF620	zinc finger protein 620	5.38992	5.31523	5.47638	5.21297	4.9721	5.4479	5.42296	5.20126	4.95845
8078991	ZNF619	zinc finger protein 619	5.32936	5.07488	5.16409	5.20376	5.42325	5.28682	5.3106	5.59806	5.52853
8157381	ZNF618	zinc finger protein 618	6.82949	6.78932	6.51627	6.1517	6.11758	5.96033	6.32943	6.45921	6.49045
8157362	ZNF618	zinc finger protein 618	7.41108	7.43284	7.39525	6.92717	6.98324	6.81067	7.12194	6.98536	7.37983
8038954	ZNF616	zinc finger protein 616	6.06567	6.61589	6.2453	6.5035	6.21052	6.69428	6.39653	6.78068	6.54157
8038952	ZNF616	zinc finger protein 616	3.58816	3.35812	3.35812	3.53284	3.63689	3.5252	2.95447	3.26307	3.35812
8038925	ZNF615	zinc finger protein 615	4.49323	4.83438	3.75771	4.23722	4.21511	4.3124	4.80926	4.87208	4.62205
8038933	ZNF614 /// ZNF432	zinc finger protein 614 /// zinc finger protein 432	5.28502	5.68338	5.02283	5.62227	5.58232	5.86963	5.87465	6.31918	6.01639
8030871	ZNF613	zinc finger protein 613	5.31417	5.17157	5.22039	5.11864	5.04224	5.1484	5.27469	5.27194	5.38857
8038981	ZNF611	zinc finger protein 611	5.92977	6.12461	5.87426	6.21149	5.96258	6.15565	5.73079	6.23303	6.24631
8030914	ZNF610	zinc finger protein 610	4.86747	4.96686	4.86065	4.61897	4.77358	4.68607	4.79901	5.18818	4.71757
7984203	ZNF609	zinc finger protein 609	8.59433	8.37613	8.0978	8.36641	8.3228	8.23855	8.35906	8.29301	8.48667
8113761	ZNF608	zinc finger protein 608	8.02305	8.10142	7.80657	8.10749	8.21735	8.53224	7.50751	7.82221	7.76898
8036436	ZNF607	zinc finger protein 607	4.72884	5.16662	4.61266	4.71978	4.72801	4.72801	4.86767	5.24648	4.80171
8039719	ZNF606	zinc finger protein 606	5.44544	5.49994	5.50382	5.47398	5.50382	5.65062	5.50382	5.73829	5.89673
7967863	ZNF605	zinc finger protein 605	3.96629	4.07519	3.48146	3.8088	3.69198	3.87093	3.57233	3.55823	3.66439
8038989	ZNF600	zinc finger protein 600	4.49613	4.48461	4.60165	4.53836	4.53623	4.60165	4.66765	5.33061	4.80009
8036038	ZNF599	zinc finger protein 599	4.3793	4.17037	4.22813	4.38256	4.42873	4.36001	4.35646	4.54807	4.56706
7998679	ZNF598	zinc finger protein 598	6.79753	6.77219	6.96812	6.83191	6.81961	6.81961	6.90862	6.48368	6.83382
7998978	ZNF597	zinc finger protein 597	4.76253	5.11526	5.00359	4.57041	4.99393	4.92729	5.17339	5.22842	5.38842
8144230	ZNF596	zinc finger protein 596	3.69543	3.72806	3.66439	3.71943	3.74472	3.66901	3.65722	3.57404	3.64522
8011823	ZNF594	zinc finger protein 594	3.47659	4.20845	3.66187	4.19691	4.14245	4.05806	4.93422	4.3161	3.58598
7899096	ZNF593	zinc finger protein 593	7.28064	7.21309	7.41406	7.16496	7.12566	7.08077	7.28669	7.05852	7.23049
7985605	ZNF592	zinc finger protein 592	7.81313	7.72001	7.57096	7.69289	7.80003	7.64458	7.56215	7.62777	7.65221
8079598	ZNF589	zinc finger protein 589	4.99168	4.85888	5.08322	4.9126	4.82194	4.96847	5.00042	5.13922	5.08359
8031815	ZNF587 /// ZNF551 /// ZNF776	zinc finger protein 587 /// zinc finger protein 551 /// zinc finger protein 776	6.92704	7.22889	6.95346	6.73888	6.81098	7.03906	6.87857	7.16807	6.95657
8031825	ZNF587	zinc finger protein 587	7.93474	8.05823	7.53029	7.80659	8.14645	7.48649	8.8478	8.99885	8.98609
8031827	ZNF587	zinc finger protein 587	7.888	7.85477	7.45747	8.17276	8.01254	8.19739	8.07652	8.44781	8.29578
8031837	ZNF587	zinc finger protein 587	6.37416	6.1773	5.74112	6.72875	6.4458	6.91488	6.33794	7.01051	6.56388
8031821	ZNF586	zinc finger protein 586	6.04786	5.75662	5.78728	5.87374	5.90706	5.89117	6.09654	6.392	6.16461
8036389	ZNF585B	zinc finger protein 585B	5.97066	6.28587	5.53429	5.36022	5.09036	5.59319	5.26531	5.7561	5.54032
8036373	ZNF585A	zinc finger protein 585A	3.95478	3.64915	3.76241	3.67473	3.64915	3.60888	3.46653	3.81897	3.74957
8031939	ZNF584 /// ZNF324B	zinc finger protein 584 /// zinc finger protein 324B	7.38071	7.35038	7.34826	7.57968	7.62676	7.4208	7.34344	7.36888	7.35175
8031640	ZNF583	zinc finger protein 583	5.35192	5.70308	4.86718	5.39419	5.59401	5.76712	5.59847	6.36619	5.48913
8039586	ZNF582	zinc finger protein 582	6.74455	6.55403	6.57292	6.58941	6.62469	6.58191	6.71505	6.76475	6.74917
8031522	ZNF581	zinc finger protein 581	7.97631	7.75441	8.02676	8.1149	8.04479	8.02508	8.02676	7.79764	7.77861
8031516	ZNF580 /// ZNF581	zinc finger protein 580 /// zinc finger protein 581	8.17943	8.08467	8.3282	8.13412	8.0384	8.15665	7.92574	7.86451	8.04997
8039524	ZNF579	zinc finger protein 579	7.74073	7.65745	7.89335	7.91259	7.76065	7.75684	7.72402	7.41057	7.66104
8030944	ZNF578 /// ZNF528	zinc finger protein 578 /// zinc finger protein 528	2.35517	2.70596	2.43332	2.4998	2.35517	2.35517	2.26751	2.25313	2.61437
8038904	ZNF577	zinc finger protein 577	6.27735	6.33799	6.23281	5.70155	5.88095	6.02122	5.90645	5.9548	5.99704
8029311	ZNF576	zinc finger protein 576	7.11577	6.88552	7.0926	6.94087	7.10781	6.97199	6.95057	7.01209	6.89813
8029301	ZNF575	zinc finger protein 575	6.19487	6.26769	6.6457	6.22687	6.51132	6.30004	6.14686	6.25993	6.09273
8029182	ZNF574	zinc finger protein 574	7.19447	7.06986	7.17577	7.29803	7.38961	7.35698	7.27247	7.27885	7.45916
8036444	ZNF573	zinc finger protein 573	5.18895	5.20944	4.91061	4.84591	4.96302	4.9926	5.10726	5.71716	5.38182
8148276	ZNF572	zinc finger protein 572	3.55711	3.44287	3.57412	3.57412	3.57921	3.68119	3.59926	3.58232	3.67167
8036406	ZNF571	zinc finger protein 571	4.85526	4.73581	4.6112	4.73581	4.73581	4.7526	4.94494	4.84973	5.0049
8028248	ZNF570	zinc finger protein 570	5.19595	4.83742	4.86256	4.59466	4.77339	4.97282	4.93507	5.22687	4.83461
8024532	ZNF57	zinc finger protein 57	5.40222	5.51812	5.59409	5.41108	5.24456	5.62715	5.40222	5.62262	5.43957
8036395	ZNF569	zinc finger protein 569	4.39314	4.64754	4.54555	4.58634	4.62914	4.5574	4.87431	4.65494	4.78395
8028213	ZNF568	zinc finger protein 568	3.79319	4.11775	3.61875	3.64731	3.53163	3.58107	3.9119	3.60599	3.75268
8028200	ZNF567	zinc finger protein 567	3.12019	3.45805	3.31519	3.24794	3.24759	3.40338	3.40976	3.86553	3.26006
8036318	ZNF566	zinc finger protein 566	4.74024	4.67553	4.21303	4.06955	4.35108	4.77277	4.4359	5.2199	4.99567
8036291	ZNF565	zinc finger protein 565	3.52205	3.53916	3.52453	3.56495	3.56495	3.64442	3.54481	4.07483	3.66573
8034401	ZNF564	zinc finger protein 564	5.21974	5.58576	5.42458	5.46652	5.31539	5.63131	5.37072	5.97056	5.35674
8034370	ZNF563	zinc finger protein 563	3.25041	3.10601	3.2685	3.26118	3.45193	3.23548	3.48742	3.5189	3.46233
8033801	ZNF562	zinc finger protein 562	5.88174	5.94789	5.59136	6.1707	6.54339	6.10478	6.45709	6.8605	6.2308
8033795	ZNF561	zinc finger protein 561	6.14786	6.01242	5.78061	6.52767	6.62845	6.79744	6.38861	6.63741	6.4073
8033767	ZNF560	zinc finger protein 560	3.25784	2.91975	2.87423	2.85651	2.95825	2.94457	3.13003	2.88902	3.16534
8027239	ZNF56	zinc finger protein 56	2.32186	2.64641	2.66658	2.6665	2.88683	2.77363	2.71851	2.66797	2.98207
8025478	ZNF559	zinc finger protein 559	6.10864	6.29179	6.1179	5.8857	6.1888	6.00108	6.1985	6.75189	6.49693
8033667	ZNF558	zinc finger protein 558	6.78144	7.04672	6.87961	6.67141	6.66849	6.77464	6.77464	7.0491	6.67717
8025132	ZNF557	zinc finger protein 557	6.81399	6.75188	6.41547	6.73437	6.79669	6.59401	6.59815	6.83105	6.30224
8024527	ZNF556	zinc finger protein 556	3.87237	4.00977	3.92247	4.0752	3.95863	3.95863	3.82752	3.76072	4.0208
8024518	ZNF555	zinc finger protein 555	5.42602	5.58354	5.60131	5.20469	5.50924	5.72954	5.40406	5.6261	4.99576
8024511	ZNF554	zinc finger protein 554	5.1937	5.09625	5.14027	5.22723	4.86161	5.07512	4.79052	4.97656	5.07177
7994813	ZNF553	zinc finger protein 553	5.97459	5.86802	5.7105	5.65091	5.61586	5.40158	5.56567	5.30788	5.46691
8039687	ZNF552	zinc finger protein 552	5.30019	5.81818	5.56562	5.23714	5.36139	4.86705	5.43404	5.56931	5.28396
8031807	ZNF551	zinc finger protein 551	5.54755	5.18855	5.45805	5.50977	5.96826	5.56877	5.9873	6.13962	6.10934
8039655	ZNF550	zinc finger protein 550	6.13048	6.06149	5.89636	6.18635	6.19048	6.39128	6.21394	6.23405	6.30776
8031762	ZNF549	zinc finger protein 549	5.74038	5.99048	5.30999	5.53809	5.67584	5.60194	5.60194	5.897	5.69686
8028770	ZNF546	zinc finger protein 546	3.28352	3.10258	3.19754	3.185	3.06618	3.19013	3.185	3.02907	3.30269
8036309	ZNF545	zinc finger protein 545	5.27932	5.46645	5.12758	5.31057	5.16878	5.30657	5.35848	5.50894	5.12758
8031884	ZNF544	zinc finger protein 544	4.15786	3.71108	4.16743	4.12767	3.96569	3.97308	3.97308	3.96591	3.72663
8031720	ZNF543	zinc finger protein 543	7.11628	7.06679	7.01701	7.00835	7.39718	7.03936	7.02448	7.19267	7.22248
8031632	ZNF542	zinc finger protein 542	7.56115	7.67291	7.43581	7.58634	7.48814	7.64924	7.72005	7.78252	7.8566
8037931	ZNF541	zinc finger protein 541	4.77477	4.91009	4.93523	4.99734	4.85474	4.9255	4.93283	4.61632	5.11587
8028266	ZNF540	zinc finger protein 540	2.67675	2.80973	2.8504	3.00397	2.80582	2.70276	2.77748	2.77989	2.8162
8027431	ZNF536	zinc finger protein 536	3.94597	3.72673	3.64696	3.58336	3.61348	3.49002	3.53051	3.33252	3.44406
8030939	ZNF534 /// ZNF528	zinc finger protein 534 /// zinc finger protein 528	3.59502	3.56752	3.90118	3.73815	3.56288	3.58223	3.62974	3.08679	3.60222
8021442	ZNF532	zinc finger protein 532	9.29266	9.43015	9.18667	8.9834	8.99123	9.19239	9.26233	9.47786	9.51039
8031778	ZNF530	zinc finger protein 530	5.24634	5.13217	5.17445	5.20042	5.3607	5.39123	5.5438	5.94204	5.73529
8036333	ZNF529	zinc finger protein 529	5.56215	5.28317	5.01574	4.77507	4.90283	5.20219	5.27844	5.8252	5.20921
8030931	ZNF528	zinc finger protein 528	5.2836	5.4254	5.11864	4.85894	5.18952	5.21206	5.31589	5.41479	5.30515
8028241	ZNF527	zinc finger protein 527	5.28772	5.29187	5.60685	5.15836	4.99659	5.15296	5.24911	5.40177	5.15296
8029188	ZNF526	zinc finger protein 526	6.99842	6.74593	6.91914	7.17562	7.17051	7.34123	7.11107	6.94651	7.16257
8031511	ZNF524	zinc finger protein 524	6.87605	6.92861	7.13347	7.12525	7.21743	7.14998	6.99921	6.87979	6.88084
8022612	ZNF521	zinc finger protein 521	7.80839	8.07659	7.65074	7.29809	7.42494	7.73871	6.1858	6.77336	6.93991
8022420	ZNF519	zinc finger protein 519	3.4988	3.24595	3.02443	3.24595	3.35921	3.24595	3.27537	3.26501	3.32754
8099364	ZNF518B	zinc finger protein 518B	6.78765	6.83403	6.59494	6.47752	6.58455	6.97848	6.76676	7.04643	6.9628
7929562	ZNF518A	zinc finger protein 518A	4.1131	4.54822	4.16154	4.11512	3.85071	4.26783	4.2675	4.6871	4.34507
8148932	ZNF517	zinc finger protein 517	6.29849	6.3864	6.5448	6.33601	6.23251	6.36569	6.24316	5.91427	6.08454
8023882	ZNF516	zinc finger protein 516	7.60328	7.53604	7.55371	7.81062	7.99998	7.70483	7.21267	7.14437	7.39674
8053775	ZNF514	zinc finger protein 514	5.84456	5.75415	5.7273	5.88649	5.87344	6.02947	5.70409	6.01523	5.86627
8051113	ZNF513	zinc finger protein 513	7.92231	7.81866	7.90921	7.75655	7.7307	7.905	7.54418	7.33814	7.53103
8067773	ZNF512B	zinc finger protein 512B	6.60173	6.47827	6.76745	6.65575	6.47827	6.47827	6.58577	6.21106	6.42948
8040985	ZNF512	zinc finger protein 512	8.38779	8.16159	7.84973	7.42912	7.57511	7.61407	8.36643	8.65728	8.74796
7931561	ZNF511	zinc finger protein 511	7.24	7.04123	7.16517	7.24568	7.39234	7.13777	7.19987	7.16567	7.19987
8162631	ZNF510	zinc finger protein 510	5.41449	5.39585	4.9395	5.20294	4.9596	4.98887	5.23841	5.4082	5.56839
8093829	ZNF509	zinc finger protein 509	6.1493	6.08628	5.84637	5.93975	6.08628	6.08628	6.18471	6.18181	6.36199
8027439	ZNF507	zinc finger protein 507	7.02772	7.46575	7.01281	6.94137	6.96499	7.21488	6.83074	7.25882	6.94561
8035773	ZNF506	zinc finger protein 506	6.15716	6.31451	5.98307	5.60689	5.65349	5.69099	6.45476	6.7315	6.26671
7934553	ZNF503	zinc finger protein 503	7.61688	7.46927	7.60453	7.55516	7.74867	7.60079	7.36126	7.3382	7.43224
8079224	ZNF502	zinc finger protein 502	3.78229	3.84055	3.6188	3.80189	3.66439	3.66439	3.49847	4.04218	3.66439
8079229	ZNF501	zinc finger protein 501	4.22703	4.01848	3.57461	4.05742	4.0727	4.57572	4.21214	4.42765	4.58781
7999196	ZNF500	zinc finger protein 500	5.97898	5.97359	6.19611	6.29926	5.97729	6.14672	6.06817	5.99598	6.15168
8134644	ZNF498	zinc finger protein 498	7.4638	7.40853	7.16241	7.54035	7.50153	7.40354	7.59925	7.26313	7.62187
7925705	ZNF496	zinc finger protein 496	6.76594	6.82641	6.83639	6.82641	6.80092	6.78473	6.82641	6.79816	7.07948
8027304	ZNF493	zinc finger protein 493	3.72628	3.76838	3.53405	3.41923	3.63828	3.92243	3.64994	3.92744	3.92572
8035831	ZNF492 /// ZNF98	zinc finger protein 492 /// zinc finger protein 98 (F7175)	3.19522	3.70148	3.33953	3.45618	3.43647	3.47425	3.73094	4.08531	3.80365
8027345	ZNF492	zinc finger protein 492	4.33832	3.58532	3.84695	4.26556	4.33354	3.72133	5.1953	5.25517	4.58045
8025951	ZNF491	zinc finger protein 491	3.46707	3.54688	3.82545	3.5795	3.5755	3.58337	3.63593	3.32828	3.48629
8034408	ZNF490	zinc finger protein 490	6.71747	6.55044	6.37249	6.31294	6.4632	6.15549	5.9321	6.29222	6.28368
7927383	ZNF488	zinc finger protein 488	5.08924	5.13751	5.50201	4.9714	4.91582	5.37237	5.48731	5.06685	5.20969
7927169	ZNF487	zinc finger protein 487	4.42452	3.78409	4.50028	4.13164	5.0241	4.41155	4.15585	4.20938	4.96969
8027260	ZNF486	zinc finger protein 486	5.21732	5.73307	5.48324	5.87002	6.14402	5.98832	6.3139	6.25752	6.37955
7927173	ZNF485	zinc finger protein 485	5.35576	5.13365	4.75285	4.8739	4.67995	4.92981	4.86557	5.55017	4.95768
8162449	ZNF484	zinc finger protein 484	5.65819	5.66256	5.49881	5.53635	5.25032	5.54508	5.50532	6.02279	5.72026
8157193	ZNF483	zinc finger protein 483	3.16878	3.16878	3.25138	3.48231	3.26596	3.16878	3.02737	3.05677	3.16878
8030908	ZNF480	zinc finger protein 480	6.07008	6.29743	5.95487	5.75995	6.03763	6.06406	6.26496	6.56793	6.15042
8139800	ZNF479 /// LOC643955	zinc finger protein 479 /// zinc finger protein 479 pseudogene	3.13879	3.2793	3.23987	3.33191	3.22534	3.22534	3.20428	3.48453	3.22534
8133023	ZNF479 /// LOC643955	zinc finger protein 479 /// zinc finger protein 479 pseudogene	3.35349	3.51418	3.43614	3.49143	3.42369	3.42369	3.42369	3.61372	3.42369
8139772	ZNF479	zinc finger protein 479	3.28986	3.106	3.79796	3.70608	3.58675	3.35924	2.99146	3.60178	3.37744
8107591	ZNF474	zinc finger protein 474	3.54621	3.51804	3.80363	3.651	3.54447	3.71236	3.29569	3.19667	3.35324
8030569	ZNF473	zinc finger protein 473	5.67146	5.70632	5.71881	6.59172	6.87519	6.75025	6.70407	7.01931	6.9176
8031650	ZNF471	zinc finger protein 471	3.86318	4.34675	3.84809	4.33439	3.71047	3.92315	3.68699	3.84317	4.06238
8031669	ZNF470	zinc finger protein 470	5.1343	5.13237	4.53514	4.96949	4.78835	4.99536	4.75474	4.84395	5.04912
7997765	ZNF469	zinc finger protein 469	6.27628	6.31347	6.52537	6.39661	6.2748	6.29552	6.26287	5.97151	6.28645
8038998	ZNF468	zinc finger protein 468	5.61577	5.66916	5.34666	4.98341	5.10042	5.30657	5.40231	5.94901	5.53789
8143749	ZNF467	zinc finger protein 467	8.29505	8.20893	8.22517	7.49515	7.45101	7.62354	7.49285	7.28523	7.60056
8157105	ZNF462	zinc finger protein 462	8.2825	8.57048	8.13652	7.14938	7.34563	7.28631	7.5363	7.77754	7.81658
8036341	ZNF461	zinc finger protein 461	5.49502	5.70053	5.4856	5.60579	5.51831	6.08224	5.42356	6.02794	5.58459
8031714	ZNF460	zinc finger protein 460	8.68757	8.72375	8.41175	9.16912	9.22963	9.31939	9.17255	9.43514	9.43569
8110478	ZNF454	zinc finger protein 454	4.05179	4.19543	4.27872	4.32728	4.26723	4.46274	4.28257	4.14547	4.28545
8124594	ZNF452	zinc finger protein 452	4.5	4.5022	4.50962	4.5022	4.50814	4.7736	4.24163	4.65879	4.5022
8120382	ZNF451 /// KIAA1702	zinc finger protein 451 /// KIAA1702 protein	6.3118	6.74446	6.32189	6.19193	6.47134	6.52681	6.43499	6.95045	6.81339
8037433	ZNF45	zinc finger protein 45	5.42845	5.67568	5.03944	5.52501	5.55391	5.78217	5.47511	6.0614	5.8045
8170015	ZNF449	zinc finger protein 449	3.51386	3.89195	3.92632	4.13244	4.22617	4.07866	4.25143	4.79321	4.31538
8031962	ZNF446	zinc finger protein 446	6.78225	6.84184	6.98415	7.19226	6.95244	7.06053	6.86297	6.61818	6.86648
8086482	ZNF445	zinc finger protein 445	6.23532	6.21622	6.15345	6.01358	6.043	6.32206	6.45375	6.90412	6.36567
8031617	ZNF444	zinc finger protein 444	7.44611	7.42541	7.46992	7.32719	7.2616	7.20486	7.19433	7.23227	7.25966
8034393	ZNF443	zinc finger protein 443	3.4117	3.14254	2.932	2.90193	3.26224	2.73854	3.42256	3.23776	2.83444
8034379	ZNF442	zinc finger protein 442	4.00573	4.25683	4.44977	4.32638	4.37689	4.13969	4.221	4.39552	4.60519
8025945	ZNF441	zinc finger protein 441	2.9958	2.82371	3.24555	2.99838	2.86207	2.89	2.89319	3.30762	2.82504
8025958	ZNF440	zinc finger protein 440	4.78956	5.0647	4.77254	5.10533	4.72282	4.93898	4.74808	4.81576	5.09296
8034349	ZNF44	zinc finger protein 44	4.56558	4.28671	4.28982	4.50298	4.16526	4.2495	4.37397	4.62536	4.55177
8025964	ZNF439	zinc finger protein 439	4.10845	4.5392	4.06337	4.17883	4.09769	4.12226	4.04845	4.13326	3.91406
7932867	ZNF438	zinc finger protein 438	3.92656	3.41063	3.82859	3.98447	3.92656	4.15063	3.8646	3.88639	3.79797
7913582	ZNF436	zinc finger protein 436	8.17827	8.17348	7.84158	7.5706	7.8231	7.83756	7.36733	7.56952	7.49643
7998967	ZNF434	zinc finger protein 434	6.5791	6.61798	6.75417	6.78665	6.77169	6.67051	6.7066	6.84348	6.75464
8034320	ZNF433	zinc finger protein 433	3.96427	4.01678	3.77697	3.70945	3.71688	4.05935	3.97229	4.60095	4.02888
8038942	ZNF432	zinc finger protein 432	5.30459	5.53048	5.19423	4.78999	5.07068	5.03095	5.13605	5.09879	5.13262
8027292	ZNF431	zinc finger protein 431	3.56614	3.51734	3.22312	3.44852	3.2302	3.52448	3.72023	4.04167	4.04965
8027279	ZNF430	zinc finger protein 430	3.84366	3.82924	3.63089	3.84495	3.83297	3.83116	4.36014	4.21318	4.01687
8035813	ZNF43	zinc finger protein 43	2.967	3.11468	3.0519	3.23151	2.94984	3.10125	3.51221	3.60419	3.24069
8027312	ZNF429	zinc finger protein 429	3.94032	4.26335	3.94032	4.17585	3.94032	3.90891	4.29694	4.17603	3.82857
8037355	ZNF428	zinc finger protein 428	6.36326	6.30855	6.44942	6.29127	6.21425	6.34634	6.09394	5.91004	6.06174
8033780	ZNF426	zinc finger protein 426	6.13474	6.3728	6.22751	6.24667	5.83946	6.27025	6.54551	6.96014	6.63861
8143702	ZNF425	zinc finger protein 425	6.58797	6.33263	6.43661	6.57337	6.5946	6.52463	6.10238	5.99697	6.09505
8001337	ZNF423	zinc finger protein 423	4.51511	4.40308	4.53321	4.51511	4.53956	4.68973	4.42603	4.43186	4.62928
8028219	ZNF420	zinc finger protein 420	4.02596	3.89811	3.83019	3.89811	3.89811	4.04632	3.99971	4.37334	3.91383
8031750	ZNF419	zinc finger protein 419	6.65376	6.46199	6.43981	6.60929	6.60014	6.40587	6.6256	6.65825	6.64827
8039698	ZNF418	zinc finger protein 418	4.64417	4.65092	4.61119	4.50638	4.56321	4.45174	4.58739	4.73047	4.67495
8039695	ZNF417	zinc finger protein 417	7.33429	7.29066	7.28476	7.30873	7.44117	7.60624	7.14639	7.20177	7.4836
8039664	ZNF416	zinc finger protein 416	7.17862	6.98003	6.68876	7.1403	7.12917	7.13364	7.3316	7.45185	7.54529
8039044	ZNF415	zinc finger protein 415	2.81487	2.70596	2.88248	2.70114	2.7977	2.7336	2.7977	2.7977	2.83799
8033598	ZNF414	zinc finger protein 414	8.08701	7.9605	8.19826	8.39516	8.36528	8.22469	8.0972	7.90841	7.98919
7975645	ZNF410	zinc finger protein 410	7.85587	7.71757	7.63098	8.41429	8.34283	8.29764	8.45872	8.59755	8.39547
8172307	ZNF41	zinc finger protein 41	5.76853	5.74087	5.77782	5.76967	5.7736	5.58624	5.76853	6.16341	5.65
7978059	ZNF409	zinc finger protein 409	6.46772	6.17023	6.13507	5.89297	5.809	5.77931	5.65982	5.39725	5.64544
7939699	ZNF408	zinc finger protein 408	6.13189	5.99678	6.03379	6.34454	6.18009	6.0728	6.20823	6.23457	6.25639
8021756	ZNF407	zinc finger protein 407	5.84483	5.7973	5.97316	6.12005	5.97764	5.78082	5.64055	5.7616	5.5203
8037430	ZNF404	zinc finger protein 404	4.03957	3.88451	3.63627	3.65317	3.82606	3.98515	3.84922	4.17947	4.05038
8137091	ZNF398	zinc finger protein 398	6.24139	6.35667	5.94763	6.35036	6.5178	6.42508	6.58982	6.44945	6.49688
8022872	ZNF397OS /// ZNF397	zinc finger protein 397 opposite strand /// zinc finger protein 397	5.06718	5.05227	5.01099	5.16486	5.19356	5.28788	4.69407	4.95112	4.97942
8020889	ZNF397	zinc finger protein 397	5.41415	5.69911	5.07672	5.35824	5.24599	5.64875	5.56516	5.94435	5.59026
8022892	ZNF396	zinc finger protein 396	3.68713	3.45237	3.76392	3.60354	3.75333	3.66711	3.61883	3.56917	3.48059
8149986	ZNF395 /// FBXO16	zinc finger protein 395 /// F-box protein 16	7.69693	7.55543	7.53782	8.37738	8.30155	8.34178	8.41203	8.30794	8.50249
8141305	ZNF394	zinc finger protein 394	7.46178	7.4074	7.12539	7.5782	7.38769	7.43378	7.41635	7.46298	7.34356
8117572	ZNF391	zinc finger protein 391	4.4193	4.62829	4.63137	4.72139	4.62829	4.63774	4.71694	4.61561	4.82329
8085774	ZNF385D	zinc finger protein 385D	3.3819	3.26362	3.36796	3.63981	3.55709	3.19089	3.56607	3.1748	3.36535
8015503	ZNF385C	zinc finger protein 385C	5.01642	4.96318	5.03072	4.89169	4.89344	4.89169	4.776	4.67555	4.93814
8057418	ZNF385B	zinc finger protein 385B	5.72782	5.41578	5.57717	5.46955	5.74027	5.54623	5.407	5.19763	5.4464
7963774	ZNF385A	zinc finger protein 385A	7.67053	7.48638	7.52794	6.74237	6.60473	6.9158	6.86724	6.73788	6.89916
7960666	ZNF384	zinc finger protein 384	8.56869	8.46676	8.49009	8.65494	8.72752	8.67375	8.65782	8.52543	8.61562
8028227	ZNF383	zinc finger protein 383	5.52635	5.82839	5.23618	5.43061	5.52635	5.52635	5.63703	6.1375	5.92445
8028194	ZNF382	zinc finger protein 382	2.87782	2.71275	2.90772	2.90252	3.02786	2.93701	2.65678	2.90532	2.84116
7933129	ZNF37B /// LOC100129482	zinc finger protein 37B /// similar to zinc finger protein 37a (KOX 21)	5.02927	4.7436	5.14201	5.05883	5.14387	5.28587	4.95324	4.99811	4.96933
7927071	ZNF37A	zinc finger protein 37A	3.46465	3.43031	3.7472	3.78277	3.86866	3.78503	3.83573	3.26579	3.59696
8162601	ZNF367	zinc finger protein 367	5.14745	4.99369	5.04008	5.88306	5.76622	5.80927	5.4217	5.36821	5.62424
8112584	ZNF366	zinc finger protein 366	3.75026	3.92161	4.07349	3.99728	4.01189	4.22112	4.10915	3.78949	3.99728
7927747	ZNF365	zinc finger protein 365	4.51968	4.35883	4.35883	4.50133	4.41451	4.46598	4.35883	4.35883	4.21544
7904830	ZNF364	zinc finger protein 364	8.3939	8.31361	8.09994	7.97256	8.04209	7.8908	7.98944	7.97579	7.89547
7899870	ZNF362	zinc finger protein 362	8.02848	8.12306	7.94185	8.17818	8.05817	8.05212	7.8498	7.78389	7.9519
8025179	ZNF358	zinc finger protein 358	9.46767	9.58276	9.64315	8.96932	8.97424	8.9507	9.20087	8.98026	9.20087
8110491	ZNF354C	zinc finger protein 354C	3.46581	3.61386	3.78372	3.60867	3.75367	3.44172	3.60878	3.42796	3.71784
8110463	ZNF354B	zinc finger protein 354B	4.43614	4.46092	4.465	4.13696	4.28897	4.51703	4.81794	4.76753	4.63111
8116247	ZNF354A	zinc finger protein 354A	5.64499	5.89723	5.70603	5.45322	5.5663	5.72218	5.54812	6.03314	5.78638
8038919	ZNF350	zinc finger protein 350	5.88771	6.0332	5.73819	6.04023	5.91298	5.97654	5.90724	6.1793	6.03701
8079217	ZNF35	zinc finger protein 35	6.24558	6.3807	6.23813	6.44437	6.4315	6.53358	6.40274	6.7085	6.84517
8039054	ZNF347	zinc finger protein 347	4.62799	4.61089	4.57274	4.1739	4.24211	4.9775	5.02409	5.57916	4.87695
8110253	ZNF346	zinc finger protein 346	8.35526	8.38225	8.22157	8.09179	8.23408	8.20641	8.54792	8.33048	8.49375
8028206	ZNF345	zinc finger protein 345	2.90385	2.54783	2.55556	2.54783	2.22492	2.537	2.50108	2.36591	2.64764
8064514	ZNF343	zinc finger protein 343	6.28281	5.91153	6.34714	6.31825	6.36575	6.26961	6.69301	6.80044	6.62718
8037495	ZNF342	zinc finger protein 342	6.83018	6.50495	6.80347	6.69181	6.64514	6.74253	6.6123	6.31075	6.50726
8061946	ZNF341	zinc finger protein 341	6.29435	6.2774	6.24346	6.14982	6.26045	6.28811	6.1786	6.08575	6.08585
8153896	ZNF34	zinc finger protein 34	5.62067	5.60502	5.71572	5.63268	5.45646	5.83933	5.76352	5.41152	5.86697
7933139	ZNF33B	zinc finger protein 33B	4.32514	4.401	4.35201	4.06629	4.264	4.3564	4.33729	4.72946	4.88462
7927062	ZNF33A	zinc finger protein 33A	4.27122	4.38845	4.28005	4.75007	4.48949	4.54843	4.94813	4.60736	4.48949
8065517	ZNF337	zinc finger protein 337	6.00525	5.92531	5.70521	6.11622	6.17304	6.22552	6.1249	6.49463	6.27569
8066641	ZNF335	zinc finger protein 335	7.29374	7.45095	7.17954	7.68878	7.63053	7.30948	7.47722	7.31613	7.41857
8066745	ZNF334	zinc finger protein 334	3.18491	3.26007	3.23294	3.35427	3.26007	3.27855	3.26007	3.16585	3.26007
8026365	ZNF333	zinc finger protein 333	5.55259	5.47081	5.72992	5.37802	5.29992	5.38697	5.48051	5.42464	5.53447
8030999	ZNF331	zinc finger protein 331	5.13449	5.15255	5.77514	5.60062	5.51383	5.6008	5.98056	6.25778	5.88649
8097543	ZNF330	zinc finger protein 330	8.00857	8.03175	7.85616	7.4497	7.64867	7.58599	8.00788	8.23833	8.17337
8039740	ZNF329	zinc finger protein 329	6.7554	6.92657	6.6618	6.22124	6.51978	6.38662	6.51978	6.84622	6.74536
7902891	ZNF326	zinc finger protein 326	5.07112	5.32201	5.0375	5.2357	5.35339	5.16488	5.07112	5.75619	5.11963
8031949	ZNF324B /// ZNF584	zinc finger protein 324B /// zinc finger protein 584	6.67287	6.76402	6.87146	6.91801	6.9693	7.08251	6.98862	6.62496	6.73092
8031956	ZNF324	zinc finger protein 324	6.60189	6.70349	6.38984	7.0058	6.91614	6.90036	6.62471	6.33858	6.32509
8124562	ZNF323	zinc finger protein 323	7.97053	8.01439	7.65731	8.12879	8.18697	8.305	8.55865	8.97657	8.67167
8162669	ZNF322A /// ZNF322B	zinc finger protein 322A /// zinc finger protein 322B	6.02624	6.30795	5.70758	6.07151	6.26133	6.55732	6.07151	6.71931	6.11951
8124459	ZNF322A /// ZNF322B	zinc finger protein 322A /// zinc finger protein 322B	6.00544	6.31639	5.73747	6.20711	6.29969	6.54626	6.12121	6.69687	6.25524
8039013	ZNF321	zinc finger protein 321	4.96178	4.87555	4.81362	4.48675	4.79249	4.95986	5.60339	5.29055	5.45575
8039006	ZNF320	zinc finger protein 320	5.06203	5.4538	4.66206	3.97833	4.24579	4.56524	4.63303	4.96129	4.57682
7933186	ZNF32	zinc finger protein 32	7.76264	7.55868	7.12735	7.52903	7.70622	7.58629	7.79467	7.97348	7.92152
8001651	ZNF319	zinc finger protein 319	6.02306	5.80742	6.06402	6.24724	6.25435	6.08152	5.95974	5.80805	6.01307
8126542	ZNF318	zinc finger protein 318	6.62482	6.58877	6.60098	6.5636	6.76979	6.59048	6.66397	6.67257	6.3728
8025458	ZNF317	zinc finger protein 317	7.94074	7.88395	7.71634	7.72284	7.72713	7.59844	7.76789	8.01098	7.92276
8063369	ZNF313	zinc finger protein 313	9.2905	9.17533	9.14529	9.98278	10.0052	9.89573	9.94249	9.89215	9.93014
8124622	ZNF311	zinc finger protein 311	3.9495	5.02307	4.67265	4.73624	4.7129	4.75173	4.57819	5.29807	5.07599
8178275	ZNF311	zinc finger protein 311	3.9495	5.02307	4.67265	4.73624	4.7129	4.75173	4.57819	5.29807	5.07599
8031726	ZNF304	zinc finger protein 304	6.64639	6.44801	6.08408	6.5927	6.71968	6.67517	6.57626	7.14143	6.58736
8027674	ZNF302	zinc finger protein 302	7.06144	7.5263	7.12758	6.76352	6.90558	7.11128	7.17847	7.79793	7.56069
8115196	ZNF300	zinc finger protein 300	4.94024	5.10384	4.91812	5.01002	4.95605	5.04001	5.4853	5.78024	5.54904
8027692	ZNF30	zinc finger protein 30	3.64587	3.90941	3.81397	3.86571	3.62636	3.63375	3.93617	3.9164	4.21988
8141380	ZNF3	zinc finger protein 3	7.7436	7.5894	7.57065	7.66767	7.87448	7.73097	7.79956	7.83103	7.88823
8070557	ZNF295	zinc finger protein 295	7.00011	7.28174	6.84756	7.25274	7.31873	7.40297	7.27768	7.65366	7.45986
8069711	ZNF294	zinc finger protein 294	5.83408	6.15989	5.8019	6.15989	6.15989	6.53119	6.07101	6.65866	6.21867
8120992	ZNF292	zinc finger protein 292	6.05053	5.95286	5.69867	5.95286	5.91332	5.97441	5.95286	6.35971	6.13004
8005106	ZNF29	zinc finger protein 29 pseudogene	2.82799	2.76804	3.14552	2.91671	2.94021	2.94919	2.99676	2.89754	3.08627
8013026	ZNF287	zinc finger protein 287	4.6262	4.67193	4.51686	4.30779	4.6262	4.5763	4.79301	4.76364	4.6262
8005117	ZNF286A /// TBC1D26 /// TBC1D28	zinc finger protein 286A /// TBC1 domain family, member 26 /// TBC1 domain family, member 28	4.6437	5.61678	5.73687	6.00201	5.33246	5.61678	5.61678	5.18507	5.19051
8005110	ZNF286A /// TBC1D26	zinc finger protein 286A /// TBC1 domain family, member 26	6.83068	7.05394	6.65838	6.37193	6.63804	6.71935	6.68358	6.96875	6.77374
8013305	ZNF286A	zinc finger protein 286A	5.25892	5.64144	5.10629	4.99129	5.15591	5.36159	5.08244	5.61566	5.1837
8029435	ZNF285B	zinc finger protein 285B	2.85274	2.2544	2.76298	2.70555	2.74098	3.07248	2.31835	2.71247	2.69368
8037459	ZNF285A	zinc finger protein 285A	4.39118	4.16696	4.05276	3.85363	4.19019	4.18658	4.44635	4.22763	4.21905
8029368	ZNF284	zinc finger protein 284	6.30595	6.59598	5.92631	6.16708	6.39963	6.10269	6.25347	6.37885	6.49826
8029321	ZNF283	zinc finger protein 283	6.21497	6.30446	5.94654	5.57819	5.66129	5.70905	5.74871	6.16806	6.12507
8137101	ZNF282	zinc finger protein 282	7.2839	7.18269	7.2839	7.37239	7.36242	7.38561	7.2839	7.18917	7.30403
7923183	ZNF281	zinc finger protein 281	6.92778	7.04346	6.90569	6.89745	6.78442	6.87975	6.62172	7.08125	6.89667
7989159	ZNF280D	zinc finger protein 280D	5.7554	5.98282	5.50455	5.86774	5.74423	5.82363	5.79087	5.91618	5.74423
8175076	ZNF280C	zinc finger protein 280C	6.48472	6.62037	6.29103	5.95491	6.45026	6.39539	6.21422	6.79477	6.54024
8074845	ZNF280B	zinc finger protein 280B	5.93547	5.96982	5.96072	5.96072	5.71603	5.97878	6.09833	6.3224	6.29913
8074853	ZNF280A	zinc finger protein 280A	4.26439	3.93907	4.08941	3.94893	4.07394	3.99296	4.03763	3.93907	4.20862
8038993	ZNF28	zinc finger protein 28	5.95963	6.32865	5.84541	5.33436	5.1146	5.12291	5.92273	6.57315	5.91236
8135497	ZNF277	zinc finger protein 277	6.38873	6.64615	6.27349	6.08401	6.1749	6.32306	6.28477	6.47922	6.43653
8135512	ZNF277	zinc finger protein 277	3.5248	3.32903	3.45832	3.45832	3.39227	3.55728	3.20053	3.45832	3.39517
7998002	ZNF276	zinc finger protein 276	6.47804	6.52601	6.62369	6.49166	6.40271	6.53377	6.53641	6.40801	6.42248
8170635	ZNF275	zinc finger protein 275	7.9701	7.89164	7.68849	8.24757	8.34122	8.22351	8.12075	8.26987	8.23807
8031871	ZNF274	zinc finger protein 274	7.44191	7.4232	7.41898	7.24543	7.25439	7.32056	7.6632	7.54475	7.40561
8133062	ZNF273	zinc finger protein 273	4.95936	5.15756	4.62906	5.26921	5.42251	5.29777	5.85399	5.93766	5.63544
8020898	ZNF271	zinc finger protein 271	6.36653	6.54899	5.92305	5.14422	5.40448	5.38745	6.10948	6.64466	6.18742
7960165	ZNF268 /// ZDHHC11	zinc finger protein 268 /// zinc finger, DHHC-type containing 11	5.73267	5.54532	5.30374	5.44396	5.48423	5.50574	5.95671	5.63135	5.79128
7995258	ZNF267	zinc finger protein 267	4.51638	4.41101	4.50718	4.41101	3.9203	4.62637	4.41101	4.50312	4.5121
8033754	ZNF266	zinc finger protein 266	6.45938	6.37019	6.20904	6.86155	7.04349	7.00967	6.98659	7.41163	7.02079
8031690	ZNF264	zinc finger protein 264	8.35406	8.26298	8.22874	8.50123	8.5034	8.51009	8.2936	8.23239	8.31521
7992870	ZNF263	zinc finger protein 263	7.38808	6.93494	6.64106	7.73888	7.72965	7.51061	7.39815	7.51061	7.7416
8036324	ZNF260	zinc finger protein 260	6.45473	6.95897	6.37894	6.38819	6.34549	6.65448	6.34761	7.06151	6.71942
7960134	ZNF26	zinc finger protein 26	4.8343	5.08254	5.0241	5.1122	5.20581	4.85192	4.8842	5.70972	5.31644
7951838	ZNF259	zinc finger protein 259	8.92482	8.79386	8.79334	8.66303	8.74962	8.44606	9.39779	9.19856	9.15839
8027323	ZNF257	zinc finger protein 257	3.25835	3.12056	3.93375	3.84592	3.32477	3.90091	3.83944	4.1019	3.9337
8039706	ZNF256	zinc finger protein 256	6.12009	6.1382	5.98156	6.23133	6.21887	6.27146	6.27097	6.72383	6.4001
8027368	ZNF254	zinc finger protein 254	4.25135	4.84087	4.44808	4.41615	4.77989	4.7469	4.94671	4.95731	4.80095
8027241	ZNF253	zinc finger protein 253	4.54184	4.65529	4.08179	4.30332	4.13152	4.30332	4.64855	5.07157	4.52367
8153935	ZNF252	zinc finger protein 252	4.79427	5.26255	4.88742	4.67219	4.78765	4.84894	4.64136	5.21406	4.68482
8153890	ZNF251	zinc finger protein 251	6.4197	6.55391	6.39709	6.38078	6.37199	6.51603	6.26441	6.53535	6.36241
8153920	ZNF250	zinc finger protein 250	6.35869	6.3225	6.24269	6.28359	6.48712	6.36967	6.49166	6.45544	6.55
7933105	ZNF25	zinc finger protein 25	4.00609	4.32444	4.39449	4.72954	4.35285	4.66671	4.23626	4.51169	4.32444
7933092	ZNF248	zinc finger protein 248	4.41137	4.43059	4.48409	3.98945	3.85842	4.11694	4.1367	4.21632	4.11694
8022882	ZNF24	zinc finger protein 24	7.21675	7.52525	7.08504	6.46393	6.69023	6.67732	7.09702	7.62983	7.22615
7933180	ZNF239	zinc finger protein 239	4.50529	4.59038	4.51686	4.74199	4.73256	4.81268	5.05743	4.65808	5.23366
7911038	ZNF238	zinc finger protein 238	7.1411	7.35374	7.09087	6.23271	6.2966	6.27456	6.55418	6.63232	6.43319
8021783	ZNF236	zinc finger protein 236	6.91761	6.9365	6.73012	6.64795	6.88457	6.70721	6.81103	6.80285	6.72799
8037444	ZNF235	zinc finger protein 235	3.7792	3.93459	4.11251	3.7255	3.57117	3.77717	3.7792	3.81632	3.79326
8029392	ZNF234	zinc finger protein 234	5.4244	5.43633	4.64663	5.45917	5.34403	5.60599	5.30342	6.0779	5.56778
8029423	ZNF233	zinc finger protein 233	3.89642	4.04254	4.2366	4.08566	4.09588	4.00922	4.07819	4.23979	4.29615
8011817	ZNF232	zinc finger protein 232	5.3797	5.06242	4.87809	5.2393	5.03591	5.09873	5.33503	5.42929	5.17185
8029347	ZNF230	zinc finger protein 230	3.31452	3.34196	3.14328	3.41999	3.59569	3.40153	3.38458	3.21257	3.33521
8002533	ZNF23	zinc finger protein 23 (KOX 16)	5.00146	5.28845	4.9782	4.91577	4.71856	4.98764	4.85121	4.79917	5.0015
8037467	ZNF229	zinc finger protein 229	6.29209	6.15352	6.1362	6.21666	6.20016	6.30641	6.2243	6.68045	6.3682
8037453	ZNF228	zinc finger protein 228	3.7473	3.80351	3.59851	3.82171	3.73728	3.59231	3.83453	4.21061	3.74215
8029413	ZNF227	zinc finger protein 227	5.53741	5.63718	5.40906	5.514	5.58643	5.53741	5.49151	5.96618	5.8675
8029399	ZNF226	zinc finger protein 226	4.78184	4.83617	4.59466	4.56958	4.42221	4.4896	4.59466	4.73716	4.40257
8029385	ZNF225	zinc finger protein 225	4.77987	4.89556	4.65606	4.61005	4.56497	4.59981	4.42843	4.7656	4.42746
8029377	ZNF224	zinc finger protein 224	4.7241	5.51192	5.11077	5.3166	4.78784	5.32161	4.73333	5.78766	4.98159
8029360	ZNF223	zinc finger protein 223	4.66984	4.30894	4.20751	4.13774	4.38597	4.26695	4.68899	4.31516	4.36941
8029353	ZNF222	zinc finger protein 222	4.94687	4.91019	4.65676	4.99996	4.47807	4.6693	4.3901	4.98214	4.83502
8029331	ZNF221	zinc finger protein 221	3.36877	3.44411	3.29735	3.38082	3.55113	3.42744	3.33814	3.72022	3.57559
7927202	ZNF22	zinc finger protein 22 (KOX 15)	5.51078	5.38761	5.2222	5.22817	5.32383	5.47879	5.54317	5.90391	5.57591
7977646	ZNF219	zinc finger protein 219	6.62033	6.28812	6.43267	6.87112	6.916	6.7233	6.57109	6.29197	6.385
8067113	ZNF217	zinc finger protein 217	8.61037	8.65241	8.23652	8.06194	8.20895	8.23942	8.00202	8.27964	8.04929
7938183	ZNF215	zinc finger protein 215	5.96072	5.98917	5.70838	6.24352	6.178	6.34714	6.60372	7.17013	6.85134
7946288	ZNF214	zinc finger protein 214	4.34618	4.28377	4.04566	4.65953	4.45859	4.40899	4.20137	4.95217	4.40242
7992854	ZNF213	zinc finger protein 213	6.68668	6.63821	6.65567	6.8791	6.85519	6.68346	6.61904	6.22186	6.59444
8137112	ZNF212	zinc finger protein 212	7.46507	7.30463	7.37468	7.62865	7.6455	7.48822	7.61821	7.6059	7.69643
8031784	ZNF211 /// ZNF134	zinc finger protein 211 /// zinc finger protein 134	7.90509	7.87106	7.62615	8.00753	7.89993	8.09853	7.86942	8.15919	8.12386
8031792	ZNF211	zinc finger protein 211	6.34133	6.66187	6.16077	6.39388	6.31825	6.24471	6.2193	6.24471	6.112
8035819	ZNF208	zinc finger protein 208	2.17991	2.7474	2.52389	2.21464	2.38162	2.64415	2.46875	2.41905	2.02218
8006377	ZNF207	zinc finger protein 207	9.56245	9.70588	9.4772	9.55686	9.76319	9.69403	9.96424	10.0434	9.83486
7992845	ZNF205	zinc finger protein 205	7.13139	7.1072	7.53038	7.23126	7.3315	7.15469	7.13051	7.00243	6.98037
8124498	ZNF204	zinc finger protein 204 (pseudogene)	2.46728	2.59196	2.60718	2.5466	2.71742	2.60799	2.69057	2.60758	2.83371
7952361	ZNF202	zinc finger protein 202	5.87264	5.87767	5.46162	5.81077	5.91218	5.86445	5.96046	5.91218	6.08275
7998931	ZNF200	zinc finger protein 200	6.28332	6.14663	6.21887	6.27417	6.46105	6.3281	6.48354	6.20474	6.25485
8034342	ZNF20 /// ZNF625	zinc finger protein 20 /// zinc finger protein 625	7.98919	7.92053	7.62125	7.78344	7.7794	7.93053	7.81419	8.38493	8.48798
8034344	ZNF20 /// ZNF625	zinc finger protein 20 /// zinc finger protein 625	5.55077	5.60323	5.3666	5.34279	5.27926	5.36974	5.59342	5.73038	5.4892
8034334	ZNF20	zinc finger protein 20	4.5216	4.64725	4.27183	4.46315	4.1096	4.21394	4.54392	4.44871	4.37501
8043512	ZNF2	zinc finger protein 2	5.7836	5.47789	5.46025	6.04117	6.01193	5.76928	5.80571	5.7836	5.7836
8079204	ZNF197	zinc finger protein 197	4.26599	4.48332	4.52774	4.28986	4.24022	4.3738	4.45743	4.50559	4.46985
7945864	ZNF195	zinc finger protein 195	7.0866	7.00527	6.56549	6.55899	6.47423	6.17092	6.83731	7.01456	6.93054
8117655	ZNF193	zinc finger protein 193	6.52339	6.52703	6.27813	6.01793	6.0517	5.69306	6.60322	6.74758	6.28954
8117646	ZNF192	zinc finger protein 192	7.40505	7.50037	7.19993	7.29022	7.30104	7.40359	7.32071	7.93155	7.55516
8002547	ZNF19	zinc finger protein 19	5.38343	5.14804	5.38343	5.51498	5.51034	5.38095	5.42473	5.52605	5.47654
8156935	ZNF189	zinc finger protein 189	5.30999	5.52451	5.47722	5.31887	5.38033	5.69795	5.44194	6.11545	5.76297
8117667	ZNF187	zinc finger protein 187	5.20091	5.40306	5.23193	5.24782	5.21813	5.2516	5.57566	5.65346	5.63896
8170602	ZNF185	zinc finger protein 185 (LIM domain)	4.34673	4.50643	4.33591	4.70003	4.52366	4.68096	4.52947	4.64667	4.52947
8124502	ZNF184	zinc finger protein 184	4.79918	4.98235	4.72402	4.91637	4.84413	5.29531	4.93595	5.42741	5.17681
8172369	ZNF182 /// ZNF630	zinc finger protein 182 /// zinc finger protein 630	5.64327	5.29223	4.97533	5.02382	5.08837	4.92547	5.20124	5.49254	5.32266
8027685	ZNF181	zinc finger protein 181	5.59051	5.91892	5.47714	5.70611	5.21066	5.47172	5.7332	6.00069	6.28623
8037474	ZNF180	zinc finger protein 180	5.53585	5.56926	5.58825	5.67407	5.56143	5.79938	5.47274	5.50202	5.57426
8012843	ZNF18	zinc finger protein 18	5.62851	5.77839	5.78243	5.68881	5.83113	5.81284	5.78301	5.9115	6.16892
8005586	ZNF179	zinc finger protein 179	4.57203	4.79759	4.75045	4.70975	4.70975	4.82855	4.74723	4.41665	4.85099
8025488	ZNF177	zinc finger protein 177	4.53221	4.80632	4.6875	4.45926	4.47532	4.71206	4.6087	4.49627	4.59466
8030831	ZNF175	zinc finger protein 175	6.69672	6.7442	6.48058	6.92707	6.99875	7.21132	6.60641	7.20222	6.62676
7992897	ZNF174	zinc finger protein 174	7.09199	6.97008	6.91906	6.46197	6.60044	6.43084	6.68851	6.72596	6.72959
8031744	ZNF17	zinc finger protein 17	5.77904	5.87842	5.54238	5.88547	6.00902	5.97209	5.98922	6.17255	6.07579
8156529	ZNF169	zinc finger protein 169	4.53774	4.6376	4.2085	4.66056	4.69562	4.97765	4.66056	4.79172	4.79158
8079189	ZNF167	zinc finger protein 167	4.39816	4.39816	4.82698	4.13452	4.20305	4.35171	4.38691	4.37334	4.66293
8117630	ZNF165	zinc finger protein 165	4.06781	4.0229	4.19442	4.01024	3.96364	4.07076	3.88782	4.05034	3.77704
8039034	ZNF160	zinc finger protein 160	6.84172	7.04361	6.82022	6.74752	6.68079	7.05971	6.50772	7.25842	6.95501
8153930	ZNF16	zinc finger protein 16	5.98573	6.06801	5.95833	6.09911	6.13161	6.06309	5.89814	5.99966	5.96577
8167152	ZNF157	zinc finger protein 157	4.57045	4.61191	4.71382	4.27449	4.61191	4.62574	4.61191	4.58864	4.49756
8029340	ZNF155	zinc finger protein 155	5.44501	5.55075	5.47321	5.28015	5.44501	5.1069	5.50953	5.67571	5.47196
8039674	ZNF154	zinc finger protein 154	4.22199	3.99342	4.49097	4.14931	4.25925	4.25833	4.38973	3.91354	4.08226
8090237	ZNF148	zinc finger protein 148	6.55084	6.82055	6.459	6.44322	6.55456	6.76203	6.50599	6.72287	6.61385
8028186	ZNF146	zinc finger protein 146	6.74893	7.20632	6.6185	6.85256	6.77864	7.03603	6.74949	7.01939	6.95986
7938331	ZNF143	zinc finger protein 143	5.878	5.96343	5.74519	6.07855	6.03834	6.38453	6.03085	6.33745	6.12523
8058973	ZNF142	zinc finger protein 142	6.48918	6.53525	6.64886	7.17983	7.28881	6.97011	7.26413	7.09616	7.19844
8093336	ZNF141	zinc finger protein 141	3.98075	4.20244	4.20672	3.97201	4.01095	4.03503	4.24408	4.03503	3.81935
7960150	ZNF140	zinc finger protein 140	5.80752	5.75807	5.74123	5.56328	5.83555	5.89242	6.0384	6.26531	5.8675
8035765	ZNF14	zinc finger protein 14	3.59555	3.78885	3.55375	3.63756	3.33605	3.67863	3.34349	3.81078	3.64043
8133057	ZNF138	zinc finger protein 138	4.38424	4.29317	4.30402	4.27365	3.98691	3.96339	4.3358	5.11068	4.63074
8030954	ZNF137	zinc finger protein 137	3.50036	3.72758	3.20992	3.57511	3.42985	3.28967	3.86327	3.6765	3.53148
8025998	ZNF136	zinc finger protein 136	5.64795	5.8171	5.10501	5.41721	5.51583	5.70898	5.33925	6.1788	6.06927
8031857	ZNF135	zinc finger protein 135	4.92952	5.12586	5.13914	5.02651	5.16809	5.37753	5.13914	4.93385	5.2246
8061154	ZNF133	zinc finger protein 133	5.98096	5.82944	5.69363	5.9554	5.7544	5.76805	5.99172	5.82944	5.88649
8039771	ZNF132	zinc finger protein 132	5.92215	5.68987	5.79275	5.95258	5.77295	5.79818	5.94726	6.24542	6.02792
8105136	ZNF131	zinc finger protein 131	7.19102	7.23229	6.59773	7.17072	7.31629	7.29875	7.2418	7.84291	7.60775
7925691	ZNF124	zinc finger protein 124	7.29993	7.48812	7.18016	6.99177	7.00926	6.98482	7.3362	7.25785	7.07518
8033789	ZNF121	zinc finger protein 121	6.03057	6.21594	5.665	6.0977	6.17828	6.37141	6.21594	6.86978	6.5025
8138116	ZNF12	zinc finger protein 12	6.96093	7.40219	7.02074	6.58465	6.74735	6.80578	6.80796	7.09229	6.92146
8139832	ZNF117	zinc finger protein 117	3.6767	4.02291	3.74009	3.80201	3.87896	4.25009	4.05213	4.18546	3.87756
8030002	ZNF114	zinc finger protein 114	3.70634	3.70634	3.70634	3.70634	3.43181	3.61956	3.62909	3.77499	3.70634
8133049	ZNF107	zinc finger protein 107	5.09887	5.26705	5.09796	5.1033	5.14362	5.14584	5.28096	5.60981	5.38128
8027233	ZNF101	zinc finger protein 101	6.8934	6.97916	6.84843	6.82995	7.13636	7.05697	7.11168	7.10885	7.06464
8035808	ZNF100	zinc finger protein 100	4.55299	4.73217	4.15143	4.55299	4.62097	4.69203	5.08	5.32226	4.85786
7960158	ZNF10	zinc finger protein 10	3.46199	3.48892	3.51846	3.41264	3.56177	3.5619	3.73875	3.86675	3.46212
8066786	ZMYND8	zinc finger, MYND-type containing 8	7.45103	7.37489	7.17228	6.67153	6.95824	6.92028	7.1174	7.24201	7.21258
8165622	ZMYND19	zinc finger, MYND-type containing 19	7.88167	7.87515	7.9177	7.98449	7.95932	7.96705	7.9543	8.09375	8.09004
7934384	ZMYND17	zinc finger, MYND-type containing 17	4.5837	4.03876	4.41134	4.35753	4.58038	4.40751	4.40751	4.75264	4.5229
8003926	ZMYND15	zinc finger, MYND-type containing 15	5.05882	4.98731	5.20321	5.24882	5.11663	5.08411	5.07709	4.92782	4.80264
7915425	ZMYND12	zinc finger, MYND-type containing 12	3.96975	3.89238	4.03761	3.88414	3.78872	3.87698	3.81202	3.89449	3.75908
7925792	ZMYND11	zinc finger, MYND domain containing 11	7.93972	8.20095	7.9308	7.74594	7.79461	7.89216	7.73541	8.2099	7.91404
8087653	ZMYND10	zinc finger, MYND-type containing 10	4.95787	5.4279	5.54275	5.55791	5.32327	5.25668	5.27205	5.04345	5.03692
7914764	ZMYM6 /// LOC653160 /// LOC100130633	zinc finger, MYM-type 6 /// Hypothetical protein LOC653160 /// similar to ZMYM6 protein	6.21637	6.61298	6.27548	6.35496	6.41697	6.26491	6.27548	6.47043	6.38194
7970428	ZMYM5	zinc finger, MYM-type 5	4.55717	4.40672	4.15568	4.16285	4.46358	4.37442	4.66847	4.64684	4.65675
7899957	ZMYM4	zinc finger, MYM-type 4	7.74619	7.94543	7.72892	7.38848	7.48346	7.58429	7.65713	7.85699	7.86278
8173457	ZMYM3	zinc finger, MYM-type 3	8.37846	8.15303	8.14888	7.73933	7.8283	7.82436	7.87583	7.883	8.0288
7967900	ZMYM2	zinc finger, MYM-type 2	7.38217	7.52243	7.25611	7.01513	7.10122	7.30556	6.93992	7.24925	7.15612
7899943	ZMYM1	zinc finger, MYM-type 1	5.48569	5.44352	5.07872	5.76287	5.63976	5.72222	5.91201	6.22503	6.09808
7900413	ZMPSTE24	zinc metallopeptidase (STE24 homolog, S. cerevisiae)	8.41142	8.53466	8.22726	9.54766	9.47399	9.88992	9.40429	9.75775	9.53138
8132617	ZMIZ2	zinc finger, MIZ-type containing 2	8.72322	8.49021	8.6647	8.25503	8.16443	8.04063	7.79734	7.8017	7.91474
7928558	ZMIZ1	zinc finger, MIZ-type containing 1	8.00891	7.94441	7.95038	8.02124	7.91579	7.93246	7.87427	7.90842	8.03116
8075276	ZMAT5	zinc finger, matrin type 5	6.7973	6.92247	6.6194	6.85138	6.7973	6.73079	6.89107	6.56448	6.71922
8150419	ZMAT4	zinc finger, matrin type 4	4.24034	4.46157	4.40104	3.67877	4.09737	3.88103	4.02625	3.89993	3.85082
8092230	ZMAT3	zinc finger, matrin type 3	8.87179	9.08919	9.02153	8.84514	8.92477	8.78289	8.58351	8.6713	8.27225
8108620	ZMAT2	zinc finger, matrin type 2	8.35496	8.45574	8.11263	8.32527	8.25216	8.27314	8.83871	8.84461	8.49693
8174119	ZMAT1	zinc finger, matrin type 1	4.05631	4.06616	3.77864	3.98357	3.84875	3.95863	3.69	3.80223	4.04448
8134621	ZKSCAN5	zinc finger with KRAB and SCAN domains 5	7.19275	7.3273	7.31178	7.32315	7.28991	7.55966	7.2488	7.38118	7.2488
8124553	ZKSCAN4	zinc finger with KRAB and SCAN domains 4	5.45729	5.41038	5.6768	5.802	5.67189	5.66947	5.8144	5.73206	5.75626
8117685	ZKSCAN3	zinc finger with KRAB and SCAN domains 3	6.18039	6.147	6.12374	6.09244	6.11858	5.73809	5.83508	5.76154	5.84172
8000399	ZKSCAN2	zinc finger with KRAB and SCAN domains 2	6.78624	6.64725	6.53677	6.29247	6.30933	6.16128	6.40031	6.61501	6.48266
8134680	ZKSCAN1	zinc finger with KRAB and SCAN domains 1	8.38294	8.57825	8.257	7.85887	8.04417	8.22351	7.63538	8.27964	8.14394
8039625	ZIM3	zinc finger, imprinted 3	3.17564	3.15728	3.44423	3.31938	3.27052	3.18088	3.00774	2.97868	3.17564
8039607	ZIM2 /// PEG3	zinc finger, imprinted 2 /// paternally expressed 3	5.29029	5.01814	5.37873	5.17887	5.27485	5.09248	4.80257	4.91678	5.00724
8031768	ZIK1	zinc finger protein interacting with K protein 1 homolog (mouse)	5.26962	5.3631	5.53324	6.16176	6.32751	6.36537	6.74303	6.9071	6.72398
7972567	ZIC5	Zic family member 5 (odd-paired homolog, Drosophila)	6.47133	6.36344	6.62672	6.24834	6.41857	6.24257	6.42288	6.19917	6.35691
8091342	ZIC4	Zic family member 4	4.41832	4.28488	4.5968	4.31855	4.58463	4.50281	4.42062	4.26135	4.42916
8170200	ZIC3	Zic family member 3 heterotaxy 1 (odd-paired homolog, Drosophila)	4.85647	4.64221	4.98442	4.28897	4.42387	4.51672	4.31031	4.52007	4.4217
7969830	ZIC2	Zic family member 2 (odd-paired homolog, Drosophila)	7.91565	7.77749	8.04538	7.60148	7.77297	7.82989	7.73361	7.46636	7.79035
8083233	ZIC1	Zic family member 1 (odd-paired homolog, Drosophila)	6.84908	6.9955	6.88823	6.487	6.58644	6.60327	6.36937	6.23538	6.15408
8066279	ZHX3	zinc fingers and homeoboxes 3	6.27233	6.26924	6.1319	6.07653	6.2829	6.20681	6.21431	6.25148	6.23827
8148149	ZHX2	zinc fingers and homeoboxes 2	7.02995	6.84769	6.7276	6.94562	7.15387	6.95873	6.50163	6.47818	6.99787
8064156	ZGPAT	zinc finger, CCCH-type with G patch domain	7.76933	7.67278	7.93376	7.70948	7.62712	7.67531	7.65585	7.42616	7.52818
8003578	ZG16	zymogen granule protein 16	4.27663	4.17607	4.56986	4.49305	4.35949	4.25772	4.67675	4.07531	4.48726
7994615	ZG16	zymogen granule protein 16	4.3303	4.3303	4.46441	4.40678	4.3303	4.24213	4.54862	4.03689	4.39436
7901426	ZFYVE9	zinc finger, FYVE domain containing 9	6.42554	6.55887	6.21512	6.12106	5.95151	6.32812	6.14775	6.66663	6.36671
8099008	ZFYVE28	zinc finger, FYVE domain containing 28	5.6359	5.71268	5.78758	5.58409	5.62081	5.57921	5.42661	5.25626	5.31791
7929692	ZFYVE27	zinc finger, FYVE domain containing 27	7.38426	7.13484	7.25256	7.04542	7.04542	6.85619	7.02744	6.85661	7.01337
7979757	ZFYVE26	zinc finger, FYVE domain containing 26	6.99308	6.80811	6.71272	7.4502	7.4566	7.13611	7.34908	7.36866	7.32414
7977149	ZFYVE21	zinc finger, FYVE domain containing 21	8.39674	8.46986	8.27801	8.29048	8.27198	8.11177	7.97128	7.76033	7.55869
8085537	ZFYVE20	zinc finger, FYVE domain containing 20	7.68079	7.59332	7.46561	7.49738	7.5573	7.58375	6.47068	6.71032	6.51964
7982812	ZFYVE19	zinc finger, FYVE domain containing 19	7.12183	6.99857	7.08505	7.1088	7.05557	6.95005	7.03075	6.98334	7.05474
8106602	ZFYVE16	zinc finger, FYVE domain containing 16	4.67699	4.82392	4.33693	4.42982	4.29631	4.28573	4.71946	5.20114	4.54657
7979984	ZFYVE1	zinc finger, FYVE domain containing 1	8.78095	8.54636	8.61602	8.31065	8.37922	8.22145	7.87248	7.80561	8.09702
8176384	ZFY /// LOC100130829	zinc finger protein, Y-linked /// hypothetical protein LOC100130829	6.06216	6.15147	5.935	6.33267	6.40242	6.484	6.17214	6.19402	5.94944
8166500	ZFX	zinc finger protein, X-linked	7.59312	7.73748	7.32914	7.68855	7.48713	7.87082	7.44516	7.80754	7.43813
8032699	ZFR2	zinc finger RNA binding protein 2	5.67106	5.89545	5.94739	5.95312	5.82963	5.85433	5.68061	5.55657	5.77333
8111360	ZFR	zinc finger RNA binding protein	9.03253	9.21816	8.93014	8.77244	8.92627	9.03424	8.94323	9.39576	9.02566
8147837	ZFPM2	zinc finger protein, multitype 2	5.39757	4.96907	5.16431	5.73451	5.70427	5.94948	5.66447	5.54844	5.80952
7997767	ZFPM1	zinc finger protein, multitype 1	6.39764	6.55391	6.73253	6.59727	6.74275	6.55391	6.46771	6.35228	6.24794
7941127	ZFPL1	zinc finger protein-like 1	8.60293	8.50581	8.50216	8.66085	8.74143	8.55622	8.26685	8.24024	8.37178
8170644	ZFP92	zinc finger protein 92 homolog (mouse)	4.88942	4.81741	5.06552	4.55756	4.78284	4.90958	4.84586	4.92865	4.86495
7940118	ZFP91 /// ZFP91-CNTF /// CNTF	zinc finger protein 91 homolog (mouse) /// ZFP91-CNTF /// ciliary neurotrophic factor	7.60533	7.69222	7.45486	7.84833	7.64165	7.93094	7.49223	7.65191	7.60949
7996807	ZFP90	zinc finger protein 90 homolog (mouse)	6.06647	6.13021	5.73428	6.09987	6.06147	6.29281	6.20337	6.50163	6.37609
8067094	ZFP64	zinc finger protein 64 homolog (mouse)	7.93519	7.85727	7.8799	7.86426	8.03403	7.74526	7.85324	7.85429	7.8897
8116494	ZFP62	zinc finger protein 62 homolog (mouse)	5.73306	5.88906	5.40628	6.16921	5.54807	6.35017	6.2095	6.82119	6.20863
8124684	ZFP57	zinc finger protein 57 homolog (mouse)	4.60131	4.16784	4.53259	4.55213	4.13617	4.53777	4.48294	4.38202	4.3221
8098690	ZFP42	zinc finger protein 42 homolog (mouse)	3.03435	3.30814	3.45174	3.30814	3.08158	3.40468	3.30814	3.26016	3.44972
8148597	ZFP41	zinc finger protein 41 homolog (mouse)	6.1078	6.11511	6.16275	6.25423	6.37419	6.16275	6.18599	6.03757	6.22532
8163444	ZFP37	zinc finger protein 37 homolog (mouse)	3.27905	3.66363	3.66439	3.31551	3.72458	3.67503	3.53571	3.63132	3.5755
8051814	ZFP36L2	zinc finger protein 36, C3H type-like 2	7.74043	7.88539	7.9921	7.56687	7.57409	7.71817	7.61728	7.6496	7.65271
7979813	ZFP36L1	zinc finger protein 36, C3H type-like 1	9.5579	9.51185	9.29344	9.24983	9.3057	9.37387	9.65871	9.59297	9.6985
8028652	ZFP36	zinc finger protein 36, C3H type, homolog (mouse)	6.32558	6.6409	6.66409	6.59438	6.77641	6.57868	6.89065	6.71501	6.84033
8036420	ZFP30	zinc finger protein 30 homolog (mouse)	5.29834	5.95495	5.56022	5.54238	5.4741	5.69199	5.57018	6.08187	5.82889
8004081	ZFP3	zinc finger protein 3 homolog (mouse)	3.58392	3.58084	3.49838	3.54384	3.378	3.49763	3.40531	3.52617	3.68168
8031659	ZFP28	zinc finger protein 28 homolog (mouse)	5.73576	5.52289	5.44522	5.34836	5.54584	5.77248	5.15056	5.52133	5.3566
8110472	ZFP2	zinc finger protein 2 homolog (mouse)	3.8	3.72462	3.61418	3.47546	3.23136	3.47546	3.4513	3.43172	3.41049
8022110	ZFP161	zinc finger protein 161 homolog (mouse)	6.46323	6.29184	6.2587	6.60711	6.71225	6.75746	6.90462	7.23489	7.1889
8036304	ZFP14	zinc finger protein 14 homolog (mouse)	3.71714	3.6731	3.15714	3.25376	2.99558	3.45693	3.4777	3.36951	3.09855
7987892	ZFP106	zinc finger protein 106 homolog (mouse)	7.4141	7.62614	7.06726	7.14482	7.36067	7.45373	7.21675	7.56309	7.46841
7997257	ZFP1	zinc finger protein 1 homolog (mouse)	6.20656	6.12249	6.14408	5.93998	6.08433	6.41368	6.04838	6.62811	6.23329
8147000	ZFHX4	zinc finger homeobox 4	7.40941	7.6143	7.38408	7.01003	6.97117	7.1827	7.13501	7.45434	7.40083
8002692	ZFHX3	zinc finger homeobox 3	6.38996	6.49303	6.51173	6.4694	6.53125	6.4053	6.38125	6.28798	6.37335
7978056	ZFHX2	zinc finger homeobox 2	5.6878	5.70995	5.89984	5.21527	5.14929	5.18125	5.05077	4.92173	4.92042
8153043	ZFAT	zinc finger and AT hook domain containing	6.08651	5.91478	5.51165	5.93478	5.72064	5.77451	5.86386	5.7577	5.68326
7985259	ZFAND6	zinc finger, AN1-type domain 6	9.27765	9.45372	9.25269	8.80984	8.88878	8.9858	8.78334	8.87969	8.85818
8161747	ZFAND5	zinc finger, AN1-type domain 5	10.5711	10.5354	10.4291	10.4587	10.3636	10.6005	10.2296	10.3654	10.3429
8119227	ZFAND3	zinc finger, AN1-type domain 3	8.75125	8.6173	8.67829	8.83836	8.8341	8.80972	8.94956	8.89261	9.15654
8048478	ZFAND2B	zinc finger, AN1-type domain 2B	7.61493	7.6167	7.66449	7.36041	7.24254	7.42607	7.64001	7.64946	7.59837
8137709	ZFAND2A	zinc finger, AN1-type domain 2A	8.92086	8.84257	8.86082	9.30875	9.38424	9.09444	9.06391	9.13184	9.19426
8151561	ZFAND1	zinc finger, AN1-type domain 1	7.63928	7.88493	7.40988	8.26038	8.18292	8.41081	7.98039	8.36139	8.07852
8164464	ZER1	zer-1 homolog (C. elegans)	8.43664	8.21651	8.26728	8.03999	8.07006	8.0823	8.00085	7.8288	8.14705
8055624	ZEB2	zinc finger E-box binding homeobox 2	6.5267	6.73836	6.51079	6.50612	6.59062	6.65691	6.21782	6.53912	6.53912
7926916	ZEB1	zinc finger E-box binding homeobox 1	5.86372	5.91759	5.82997	5.72681	5.77234	5.74812	5.73308	5.89723	5.96433
8175023	ZDHHC9	zinc finger, DHHC-type containing 9	9.52019	9.3933	9.43776	9.05077	9.06889	8.94538	9.45706	9.32007	9.71559
8074892	ZDHHC8P	zinc finger, DHHC-type containing 8 pseudogene	6.24192	6.21198	6.76896	6.1366	6.21822	6.1867	6.41932	6.11487	6.12339
8071339	ZDHHC8	zinc finger, DHHC-type containing 8	6.19855	6.07236	6.34849	6.24827	6.23903	6.29366	6.31874	6.26484	6.29665
8003180	ZDHHC7	zinc finger, DHHC-type containing 7	9.16094	9.11231	9.04879	9.09276	9.0944	9.00957	9.47411	9.45659	9.45121
7936346	ZDHHC6	zinc finger, DHHC-type containing 6	8.12901	8.24906	7.77348	8.4437	8.44136	8.50511	8.55273	8.83782	8.6621
7940051	ZDHHC5	zinc finger, DHHC-type containing 5	9.6541	9.63644	9.56857	9.70307	9.64113	9.58667	9.58291	9.60752	9.65052
8131414	ZDHHC4	zinc finger, DHHC-type containing 4	10.229	10.1231	10.1549	9.9677	9.92924	9.97804	10.0472	9.94495	9.97697
8086505	ZDHHC3	zinc finger, DHHC-type containing 3	8.70207	8.60519	8.57444	8.72094	8.58698	8.48737	8.73132	8.61251	8.72108
7949645	ZDHHC24	zinc finger, DHHC-type containing 24	7.68021	7.71331	8.05092	7.81408	7.63528	7.73351	7.61093	7.2637	7.62358
8081779	ZDHHC23	zinc finger, DHHC-type containing 23	7.18858	6.98983	6.98558	6.36557	6.40413	6.47441	6.25487	6.23476	6.04223
7980344	ZDHHC22	zinc finger, DHHC-type containing 22	4.41213	4.46226	4.94297	4.80039	4.49289	4.27314	4.5325	4.21278	4.25749
8160151	ZDHHC21	zinc finger, DHHC-type containing 21	7.47223	7.6937	7.19484	5.83778	5.83061	5.92626	6.08825	6.44514	6.22447
7970524	ZDHHC20	zinc finger, DHHC-type containing 20	7.72673	7.49536	7.38031	7.83193	7.72706	7.8917	7.30692	7.55486	7.16547
8144758	ZDHHC2	zinc finger, DHHC-type containing 2	9.65818	9.84024	9.5732	7.51957	7.53954	7.74051	7.62251	7.91864	7.76512
8093074	ZDHHC19	zinc finger, DHHC-type containing 19	4.66015	4.76909	5.17366	4.83551	4.80612	4.84477	4.91618	4.61179	4.65039
7899253	ZDHHC18	zinc finger, DHHC-type containing 18	7.99928	7.89209	8.09882	8.20303	8.10518	8.13129	8.08574	7.84578	7.90772
7957277	ZDHHC17	zinc finger, DHHC-type containing 17	7.36185	7.71858	7.44979	6.30528	6.22771	6.55739	7.03388	7.46108	7.16471
7929634	ZDHHC16	zinc finger, DHHC-type containing 16	10.1204	10.0147	10.083	9.933	10.0012	9.83632	9.85779	9.83347	9.83394
8173647	ZDHHC15	zinc finger, DHHC-type containing 15	3.09489	3.09675	3.36406	3.23718	3.48561	3.24505	3.20166	3.46177	3.262
8122982	ZDHHC14	zinc finger, DHHC-type containing 14	6.69437	6.85851	6.88347	7.10764	7.04193	6.75892	7.01873	6.68571	6.60247
7938816	ZDHHC13	zinc finger, DHHC-type containing 13	9.63873	9.70234	9.47973	9.50041	9.6438	9.47861	9.03048	9.21644	9.04791
8164452	ZDHHC12	zinc finger, DHHC-type containing 12	7.34543	7.41319	7.70074	8.29755	8.26041	8.09655	7.85551	7.81753	7.77142
8110721	ZDHHC11	zinc finger, DHHC-type containing 11	4.77938	4.98513	5.38653	5.71959	5.10302	5.18522	5.07934	4.73222	5.05924
8002029	ZDHHC1	zinc finger, DHHC-type containing 1	6.53208	6.37261	6.23263	6.56916	6.49395	6.44409	6.03491	5.75739	6.02913
8047784	ZDBF2	zinc finger, DBF-type containing 2	6.44042	6.40385	6.16801	5.96516	6.3865	5.94954	5.73642	6.37819	6.08773
8078319	ZCWPW2	zinc finger, CW type with PWWP domain 2	3.16633	2.82905	3.04591	3.02367	2.86852	2.88843	2.70907	3.18297	2.78859
8141498	ZCWPW1	zinc finger, CW type with PWWP domain 1	4.27397	4.05408	4.13493	4.25146	4.54745	4.45154	3.38554	3.60475	4.01594
7962367	ZCRB1	zinc finger CCHC-type and RNA binding motif 1	8.41767	8.86263	8.44754	8.58239	8.58347	8.68682	8.63561	9.20959	8.79627
8106702	ZCCHC9	zinc finger, CCHC domain containing 9	5.76893	5.97076	5.5041	5.58318	6.17599	6.17599	6.21422	6.4292	6.21175
7967287	ZCCHC8	zinc finger, CCHC domain containing 8	6.15871	6.22567	5.7965	6.61963	6.53057	6.6039	6.47737	6.63911	6.53909
8155234	ZCCHC7	zinc finger, CCHC domain containing 7	5.69067	5.67411	5.50067	5.75972	5.85814	6.08688	6.04746	6.18876	6.09466
8162147	ZCCHC6	zinc finger, CCHC domain containing 6	5.59156	5.62558	5.34951	5.62558	5.75955	5.82097	5.62558	5.87611	5.68986
8173752	ZCCHC5	zinc finger, CCHC domain containing 5	3.16526	2.94113	3.09054	3.22723	3.06831	3.03762	2.98614	3.00838	2.96204
8094393	ZCCHC4	zinc finger, CCHC domain containing 4	6.21677	6.14421	5.96653	5.62868	5.73954	5.65995	6.45852	6.60214	6.32527
8060330	ZCCHC3	zinc finger, CCHC domain containing 3	7.34597	7.18367	7.4618	7.5555	7.76195	7.4619	7.08921	7.14434	7.16375
8021546	ZCCHC2 /// C18orf49	zinc finger, CCHC domain containing 2 /// chromosome 18 open reading frame 49	5.67626	5.63247	5.35543	5.77973	5.71767	5.79689	5.58364	5.61249	5.32998
8021542	ZCCHC2	zinc finger, CCHC domain containing 2	6.89441	7.09246	7.12042	6.80647	6.9095	6.96419	6.85279	6.48834	6.69335
7899604	ZCCHC17	zinc finger, CCHC domain containing 17	8.30965	8.22935	8.12249	8.35256	8.31433	8.10654	8.66838	8.68347	8.51901
8169432	ZCCHC16	zinc finger, CCHC domain containing 16	4.0962	3.95863	3.98643	3.94371	3.87414	3.54297	3.87414	3.87774	3.87414
8003263	ZCCHC14	zinc finger, CCHC domain containing 14	7.54768	7.509	7.23328	7.83169	7.58167	7.66202	7.18033	7.22132	7.12671
8168420	ZCCHC13	zinc finger, CCHC domain containing 13	3.96427	4.20312	4.20312	4.17885	3.88142	4.56853	4.36735	4.31366	3.99369
8169598	ZCCHC12	zinc finger, CCHC domain containing 12	4.12372	3.75479	3.96736	3.74818	3.78675	3.85792	3.72594	3.65385	3.62178
7916185	ZCCHC11	zinc finger, CCHC domain containing 11	6.82812	7.09229	6.62176	6.69892	6.65913	6.85407	6.71053	7.24113	7.01344
8114113	ZCCHC10	zinc finger, CCHC domain containing 10	4.86092	4.82038	4.77312	5.00267	5.00267	5.06166	4.98534	5.29255	5.00267
8142899	ZC3HC1	zinc finger, C3HC-type containing 1	8.21764	8.0121	8.07146	8.13965	8.07146	7.8452	8.10249	8.12413	8.04123
8143270	ZC3HAV1L	zinc finger CCCH-type, antiviral 1-like	4.96817	4.93674	5.03353	4.92347	5.01931	5.09194	5.12099	5.25619	5.23149
8143279	ZC3HAV1	zinc finger CCCH-type, antiviral 1	8.76503	8.77642	8.67447	8.73301	8.81336	8.76368	8.57058	8.706	8.59878
8054664	ZC3H8	zinc finger CCCH-type containing 8	5.13359	5.25334	4.94046	4.86366	4.96511	5.01211	4.90465	5.12593	4.89891
8073397	ZC3H7B	zinc finger CCCH-type containing 7B	9.34205	9.23618	9.23563	9.3084	9.33975	9.18929	8.98095	8.92972	9.1241
7999496	ZC3H7A	zinc finger CCCH-type containing 7A	8.01746	8.01185	7.78087	7.99234	8.11265	8.09401	8.22296	8.46457	8.30574
8044450	ZC3H6	zinc finger CCCH-type containing 6	6.42848	7.02797	6.66066	6.44303	6.47072	6.81498	5.87527	6.26358	6.05907
8037856	ZC3H4	zinc finger CCCH-type containing 4	7.37514	7.25072	7.16378	7.16318	7.2295	7.07994	7.34753	7.19738	7.24474
8153411	ZC3H3	zinc finger CCCH-type containing 3	7.32896	7.10691	7.20662	7.20662	7.21047	7.14581	7.27198	7.16692	7.30889
7997779	ZC3H18	zinc finger CCCH-type containing 18	8.77649	8.73149	8.63421	8.77927	8.84457	8.68841	8.88339	8.79228	8.93369
8046848	ZC3H15	zinc finger CCCH-type containing 15	7.25152	7.64895	7.17474	7.26335	7.07441	7.32312	7.46865	8.03873	7.62339
7976101	ZC3H14	zinc finger CCCH-type containing 14	6.37831	6.37449	6.28419	6.32119	6.34067	6.44652	6.23393	6.37523	6.32119
7971422	ZC3H13	zinc finger CCCH-type containing 13	5.68679	5.98067	5.83991	5.63715	5.51819	5.62865	5.50459	5.83053	5.62132
8130073	ZC3H12D	zinc finger CCCH-type containing 12D	6.72454	6.74594	6.95755	6.72645	6.63444	6.78276	6.69166	6.42718	6.56309
7943715	ZC3H12C	zinc finger CCCH-type containing 12C	6.81635	7.28664	6.70208	6.13371	6.36372	6.23853	6.27186	6.53706	6.26155
8167957	ZC3H12B	zinc finger CCCH-type containing 12B	4.63138	4.99764	4.32009	4.34574	5.0016	4.89734	4.10305	4.3535	4.58516
7900146	ZC3H12A	zinc finger CCCH-type containing 12A	8.27357	8.28423	8.33757	8.76295	8.77268	8.58082	8.72554	8.52973	8.58521
7908978	ZC3H11A	zinc finger CCCH-type containing 11A	8.76256	9.01075	8.61829	8.44883	8.45322	8.96589	8.46582	9.18958	8.83948
7956162	ZC3H10	zinc finger CCCH-type containing 10	6.14014	5.76206	5.92133	6.2358	6.43721	6.12524	5.81782	5.73837	5.90052
8118721	ZBTB9 /// SYNGAP1	zinc finger and BTB domain containing 9 /// synaptic Ras GTPase activating protein 1 homolog (rat)	6.59393	6.64703	6.56533	6.58284	6.73838	6.4271	6.28686	6.45544	6.52233
7914550	ZBTB8OS	zinc finger and BTB domain containing 8 opposite strand	6.06988	6.11194	5.62143	5.71405	5.43985	5.87702	5.91622	6.36478	5.53644
7899797	ZBTB8 /// RP1-27O5.1	zinc finger and BTB domain containing 8 /// zinc finger and BTB domain containing 8-like	5.78894	5.82607	5.90644	6.20033	6.07359	5.98879	6.1445	6.19494	5.95043
8023212	ZBTB7C	zinc finger and BTB domain containing 7C	5.74858	5.73126	5.75103	5.75309	5.75332	5.60467	5.73126	5.55871	5.57436
7905854	ZBTB7B	zinc finger and BTB domain containing 7B	6.84822	6.90347	7.18167	7.26159	7.29783	7.30673	6.95167	6.95388	7.16656
8032755	ZBTB7A	zinc finger and BTB domain containing 7A	8.03237	7.82869	8.16426	8.06189	7.93189	7.83724	7.79492	7.82869	7.74399
8163999	ZBTB6	zinc finger and BTB domain containing 6	6.74377	6.71365	6.72985	6.72271	6.64477	6.81686	6.6357	6.88026	6.86812
8161224	ZBTB5	zinc finger and BTB domain containing 5	7.73015	7.59061	7.54218	7.56403	7.57526	7.56403	7.68173	7.75797	7.63815
7897305	ZBTB48	zinc finger and BTB domain containing 48	5.83827	5.74941	5.88381	5.83753	5.93	5.78245	5.83753	5.54618	5.88541
8079099	ZBTB47	zinc finger and BTB domain containing 47	7.06661	6.80223	7.17638	7.08596	7.07428	7.10091	6.92844	6.87719	6.81323
8067743	ZBTB46	zinc finger and BTB domain containing 46	6.20566	6.29212	6.54601	6.38351	6.36144	6.46005	6.30579	6.13808	6.18448
8039791	ZBTB45	zinc finger and BTB domain containing 45	7.00295	7.12024	7.10506	7.44926	7.44095	7.139	7.25087	7.13254	7.19424
7952739	ZBTB44	zinc finger and BTB domain containing 44	7.90935	7.81025	7.62045	7.82714	7.95913	7.93515	7.44763	7.57437	7.64641
8157933	ZBTB43	zinc finger and BTB domain containing 43	7.06119	6.80093	6.86557	6.82078	6.91287	7.01937	6.61912	6.79528	6.76349
7923119	ZBTB41	zinc finger and BTB domain containing 41	6.0001	6.36186	5.80363	6.30041	6.18079	6.50765	6.61512	6.90837	6.50254
7898750	ZBTB40	zinc finger and BTB domain containing 40	7.58218	7.39549	7.40037	7.40548	7.49117	7.31955	7.3638	7.34303	7.44226
8012212	ZBTB4	zinc finger and BTB domain containing 4	7.53399	7.41254	7.27853	6.7116	6.82447	6.81772	6.56958	6.61048	6.81012
7964300	ZBTB39	zinc finger and BTB domain containing 39	7.35892	7.36235	7.34183	7.43209	7.35296	7.34044	7.29646	7.35984	7.36826
8083092	ZBTB38	zinc finger and BTB domain containing 38	7.46492	7.87523	7.20906	7.07312	6.91085	7.03712	7.03829	7.55237	7.40901
8083090	ZBTB38	zinc finger and BTB domain containing 38	8.76278	8.93172	8.56703	8.3088	8.4485	8.47102	8.27051	8.84065	8.54677
7907486	ZBTB37	zinc finger and BTB domain containing 37	6.47651	6.4477	6.74655	6.00462	5.78875	5.90844	5.97713	6.23961	5.95453
8157945	ZBTB34	zinc finger and BTB domain containing 34	8.02925	7.91293	7.77179	7.44496	7.67607	7.70555	7.37229	7.74288	7.61846
8157947	ZBTB34	zinc finger and BTB domain containing 34	7.11369	6.96839	6.89808	6.00469	6.35198	6.56875	6.34998	6.74704	6.50757
8157941	ZBTB34	zinc finger and BTB domain containing 34	7.40044	7.3052	7.20072	6.68412	6.90956	6.96686	6.75939	7.13117	6.92596
8169683	ZBTB33	zinc finger and BTB domain containing 33	7.30321	7.58517	7.18382	7.0563	7.13877	7.42799	6.84257	7.39382	7.19071
8027947	ZBTB32	zinc finger and BTB domain containing 32	5.42304	5.04936	5.40945	5.44974	5.47319	5.46411	5.39191	5.15308	5.34573
7948829	ZBTB3	zinc finger and BTB domain containing 3	6.85115	6.75882	6.65371	6.96911	6.98741	6.65371	6.50966	6.65371	6.76822
8164002	ZBTB26	zinc finger and BTB domain containing 26	6.5885	6.90792	6.46999	6.20048	6.28388	6.41091	6.4651	6.50536	6.38208
7979611	ZBTB25	zinc finger and BTB domain containing 25	6.877	7.00295	6.40986	6.7214	6.70449	6.45165	6.76563	7.11096	6.96141
8128767	ZBTB24	zinc finger and BTB domain containing 24	5.63577	5.61624	5.2696	5.48328	5.64225	5.74546	5.67591	5.87639	5.82335
8125731	ZBTB22	zinc finger and BTB domain containing 22	7.99483	7.95103	8.06154	7.81309	7.6749	7.7977	7.75681	7.71034	7.99606
8178988	ZBTB22	zinc finger and BTB domain containing 22	7.90174	7.83779	7.97413	7.70097	7.5496	7.56657	7.59641	7.60911	7.84991
8089701	ZBTB20	zinc finger and BTB domain containing 20	6.46852	6.40628	6.12465	6.12465	6.12807	6.21427	5.91324	6.02088	6.05857
8130185	ZBTB2	zinc finger and BTB domain containing 2	6.79133	6.59129	6.54189	6.45141	6.86416	6.6996	6.69068	7.08919	6.70769
7912675	ZBTB17	zinc finger and BTB domain containing 17	7.28614	7.21674	7.43631	7.35104	7.34924	7.31123	7.46445	7.33615	7.40719
7943984	ZBTB16	zinc finger and BTB domain containing 16	5.12321	5.07314	5.35398	5.38003	5.18452	5.18452	5.08933	4.86698	5.19647
8125201	ZBTB12	zinc finger and BTB domain containing 12	6.92535	6.85839	7.02716	6.85839	6.95135	7.00296	6.85839	6.76041	6.70814
8178683	ZBTB12	zinc finger and BTB domain containing 12	6.92535	6.85839	7.02716	6.85839	6.95135	7.00296	6.85839	6.76041	6.70814
8089234	ZBTB11	zinc finger and BTB domain containing 11	5.83862	5.96096	5.70868	5.96438	6.05258	6.21721	5.85604	6.53011	6.20259
8147040	ZBTB10	zinc finger and BTB domain containing 10	6.91322	6.7806	6.65703	6.7296	6.74663	6.87158	6.34732	6.43736	6.54552
7975068	ZBTB1	zinc finger and BTB domain containing 1	7.05551	7.24375	6.95833	7.12011	7.18924	7.38125	6.99604	7.28078	7.23681
8067221	ZBP1	Z-DNA binding protein 1	4.43568	4.50843	4.73691	4.71134	4.68264	4.66122	4.74329	4.5613	4.69912
7946635	ZBED5	zinc finger, BED-type containing 5	7.31018	7.18663	7.11059	6.8827	6.91597	7.08697	6.8361	7.28724	7.00864
8073943	ZBED4	zinc finger, BED-type containing 4	7.92072	7.91288	7.70733	7.87969	8.01948	7.90267	7.7366	7.93607	7.94399
8112740	ZBED3	zinc finger, BED-type containing 3	7.37175	7.54597	7.71758	7.76578	7.8325	7.71705	7.702	7.82542	7.89653
8089467	ZBED2	zinc finger, BED-type containing 2	5.32375	5.69779	5.94942	6.05022	5.71303	5.64883	5.74677	5.55716	5.58931
8171139	ZBED1 /// DHRSX	zinc finger, BED-type containing 1 /// dehydrogenase/reductase (SDR family) X-linked	8.48713	8.62432	8.60964	8.50305	8.51015	8.47762	8.55317	8.49678	8.50305
8177029	ZBED1 /// DHRSX	zinc finger, BED-type containing 1 /// dehydrogenase/reductase (SDR family) X-linked	8.48713	8.62432	8.60964	8.50305	8.51015	8.47762	8.55317	8.49678	8.50305
8091887	ZBBX	zinc finger, B-box domain containing	2.9055	2.84791	2.94522	2.86207	2.90162	2.94919	2.77238	2.84468	3.05573
8094968	ZAR1	zygote arrest 1	5.96153	6.40386	6.63411	6.22025	6.28907	6.36086	6.24198	6.05093	6.09901
8043725	ZAP70	zeta-chain (TCR) associated protein kinase 70kDa	5.08272	5.37521	5.42246	5.44454	5.37521	5.39237	5.37521	5.01833	5.13305
8134915	ZAN	zonadhesin	4.97508	4.9952	5.21516	4.98486	4.97508	4.97508	4.93694	4.71382	4.93605
8046461	ZAK	sterile alpha motif and leucine zipper containing kinase AZK	6.21698	6.59228	6.21377	6.58538	6.5936	6.68316	6.73021	7.35256	6.7971
8023871	ZADH2	zinc binding alcohol dehydrogenase, domain containing 2	7.77852	7.72546	7.7221	7.7464	7.65301	7.94117	7.89585	8.26779	8.02187
7975632	ZADH1	zinc binding alcohol dehydrogenase, domain containing 1	5.93714	5.98817	5.84603	5.93749	5.94364	6.08458	5.93582	6.24721	6.09846
8010036	ZACN	zinc activated ligand-gated ion channel	5.13693	5.30432	5.45842	5.37533	5.25584	5.37829	5.34915	4.83786	5.13093
8166398	YY2	YY2 transcription factor	6.09131	6.12934	6.11712	6.03841	6.03841	6.03841	5.87887	6.13519	5.84114
7920799	YY1AP1	YY1 associated protein 1	8.09032	8.21674	8.07279	7.90382	7.84311	7.77885	8.36304	8.26896	8.12838
7976744	YY1	YY1 transcription factor	9.223	9.22906	9.09957	9.51619	9.52572	9.52499	9.37944	9.44589	9.3149
8152096	YWHAZ	tyrosine 3-monooxygenase/tryptophan 5-monooxygenase activation protein, zeta polypeptide	10.8749	10.9648	10.7833	10.6498	10.7939	10.7996	10.9623	11.0288	10.8184
8050215	YWHAQ /// LOC392510	tyrosine 3-monooxygenase/tryptophan 5-monooxygenase activation protein, theta polypeptide /// tyrosine 3/tryptophan 5 -monooxygenase activation protein, theta polypeptide pseudogene	11.285	11.2583	11.1986	11.3259	11.3635	11.3674	11.3399	11.3539	11.3419
8072577	YWHAH	tyrosine 3-monooxygenase/tryptophan 5-monooxygenase activation protein, eta polypeptide	7.85442	7.74957	7.7112	8.55504	8.58494	8.57893	7.78489	7.56759	7.73623
8140398	YWHAG	tyrosine 3-monooxygenase/tryptophan 5-monooxygenase activation protein, gamma polypeptide	9.56384	9.60634	9.57908	9.67654	9.73356	9.64563	8.69807	8.68201	8.85971
8011011	YWHAE /// PAFAH1B1	tyrosine 3-monooxygenase/tryptophan 5-monooxygenase activation protein, epsilon polypeptide /// platelet-activating factor acetylhydrolase, isoform Ib, alpha subunit 45kDa	11.6188	11.6695	11.5421	11.7346	11.7328	11.8571	11.5046	11.5565	11.5062
8055476	YWHAE	tyrosine 3-monooxygenase/tryptophan 5-monooxygenase activation protein, epsilon polypeptide	12.4592	12.6055	12.3767	12.5064	12.5491	12.5823	12.4639	12.4457	12.4835
8062880	YWHAB	tyrosine 3-monooxygenase/tryptophan 5-monooxygenase activation protein, beta polypeptide	10.1615	10.2454	10.0711	8.70058	8.64515	8.66484	9.99584	10.2334	9.90966
8146637	YTHDF3	YTH domain family, member 3	8.85389	9.1338	8.67754	8.84124	8.81325	9.25393	8.63611	9.00902	8.76104
7899519	YTHDF2	YTH domain family, member 2	7.68006	7.84887	7.96528	7.80563	7.82497	7.83475	7.98996	8.08793	7.72905
8067593	YTHDF1	YTH domain family, member 1	8.99739	9.01721	8.92077	9.19579	9.12665	9.24551	9.08782	9.04196	9.04219
8107375	YTHDC2	YTH domain containing 2	5.70978	6.09902	5.65207	5.70363	5.72763	5.9717	5.56028	6.20875	5.57297
8100714	YTHDC1	YTH domain containing 1	6.96921	7.15838	6.72442	7.15991	7.04841	7.31988	6.99265	7.52941	7.18272
8055361	YSK4	yeast Sps1/Ste20-related kinase 4 (S. cerevisiae)	2.57122	2.6194	2.66906	2.76364	2.55935	2.72166	2.66906	2.66906	2.66906
7915084	YRDC	yrdC domain containing (E. coli)	8.58194	8.21329	8.38013	8.90714	8.98261	8.74728	8.94558	8.62725	8.8414
8041197	YPEL5	yippee-like 5 (Drosophila)	7.77783	7.98412	7.74576	7.79196	7.86044	7.83625	7.21139	7.40319	7.6787
7948282	YPEL4	yippee-like 4 (Drosophila)	5.34416	5.11889	5.40026	5.35979	5.05041	5.55209	4.97316	4.80401	5.21485
8000791	YPEL3	yippee-like 3 (Drosophila)	6.76864	6.69253	6.92936	6.43951	6.41765	6.36591	6.17254	5.81008	6.21747
8008819	YPEL2	yippee-like 2 (Drosophila)	7.9724	8.00648	7.71902	6.93569	7.06448	6.97539	5.61393	5.76068	5.91397
8074780	YPEL1	yippee-like 1 (Drosophila)	5.34085	5.46217	5.20713	5.0967	4.77631	4.71097	4.66288	4.64724	4.94494
7923967	YOD1	YOD1 OTU deubiquinating enzyme 1 homolog (S. cerevisiae)	7.03674	7.03766	6.95744	7.25856	7.24515	7.28513	6.42767	6.4975	6.48034
7932678	YME1L1	YME1-like 1 (S. cerevisiae)	8.9776	9.25095	8.76442	8.99882	9.02476	9.47419	9.28326	9.75096	9.38294
7975725	YLPM1	YLP motif containing 1	7.52563	7.46304	7.25246	7.24645	7.25538	7.26096	7.31044	7.43239	7.24645
8132580	YKT6	YKT6 v-SNARE homolog (S. cerevisiae)	11.6731	11.5992	11.6383	11.7079	11.7709	11.707	11.451	11.3745	11.426
8100076	YIPF7	Yip1 domain family, member 7	2.98849	3.01852	2.94455	2.90598	2.97374	3.11876	3.09396	2.93191	2.93543
8168018	YIPF6	Yip1 domain family, member 6	9.27635	9.42419	9.08017	9.28388	9.28724	9.43606	8.76259	9.00833	8.86968
8114829	YIPF5	Yip1 domain family, member 5	9.00958	9.0681	8.92718	8.90178	9.11734	9.17667	8.87566	9.20524	8.93268
8041273	YIPF4	Yip1 domain family, member 4	7.4026	7.46287	7.30738	7.3612	7.48009	7.47517	7.14794	7.258	7.18133
8126574	YIPF3	Yip1 domain family, member 3	10.4998	10.4758	10.5492	10.8605	10.8851	10.7905	10.4152	10.3823	10.5539
8034108	YIPF2	Yip1 domain family, member 2	7.6055	7.66695	7.80942	8.20383	8.17807	8.12114	7.77045	7.79507	7.92547
7916343	YIPF1	Yip1 domain family, member 1	8.45982	8.42275	8.4102	7.86742	7.97949	7.95096	7.82773	7.8047	7.96912
8036483	YIF1B	Yip1 interacting factor homolog B (S. cerevisiae)	9.35042	9.29959	9.34655	9.27953	9.10318	9.10318	8.74201	8.813	8.88686
7949577	YIF1A	Yip1 interacting factor homolog A (S. cerevisiae)	8.84988	8.53746	8.89861	9.49233	9.44535	9.41677	9.06022	9.05314	9.25152
8021984	YES1	v-yes-1 Yamaguchi sarcoma viral oncogene homolog 1	7.98035	8.49906	8.02607	7.88195	7.67542	8.07218	7.38261	7.76624	7.8133
7957032	YEATS4	YEATS domain containing 4	7.45847	7.6385	7.1184	7.4463	7.55599	7.51749	7.58378	7.63298	7.40561
8084232	YEATS2	YEATS domain containing 2	8.06441	7.93668	7.83413	8.2718	8.39247	8.35248	8.56708	8.73373	8.70174
8074773	YDJC	YdjC homolog (bacterial)	7.7039	7.54004	7.83167	7.77299	7.78179	7.7264	7.81598	7.70731	7.78179
8012140	YBX2	Y box binding protein 2	7.05678	7.1507	7.31804	7.0176	7.15602	7.19981	7.17791	7.02612	6.85794
8142084	YBX1P2	Y box binding protein 1 pseudogene 2	10.4343	10.783	10.4829	9.8405	9.99108	9.88042	10.7038	10.6047	10.1925
7900585	YBX1	Y box binding protein 1	12.4815	12.5565	12.5087	12.2556	12.3022	12.2694	12.5377	12.5717	12.3766
7962203	YARS2	tyrosyl-tRNA synthetase 2, mitochondrial	7.21023	7.14536	7.04172	6.56614	6.84592	6.74631	7.18005	7.18612	6.94425
7914563	YARS	tyrosyl-tRNA synthetase	9.60551	9.52211	9.44637	9.52748	9.5458	9.37933	10.2418	10.2361	10.4515
7943398	YAP1	Yes-associated protein 1, 65kDa	8.89063	8.87887	8.94167	8.86668	9.01287	9.09765	8.91868	9.07378	8.68669
7962358	YAF2	YY1 associated factor 2	6.36001	6.18505	6.0149	6.25827	5.97719	6.09915	6.00193	6.0885	6.18857
8008297	XYLT2	xylosyltransferase II	8.4237	8.28081	8.28387	8.94542	8.84974	8.64158	8.0235	7.97004	8.14464
7999754	XYLT1	xylosyltransferase I	7.67349	7.49872	7.5888	8.58002	8.62441	8.64923	7.38492	7.15294	7.61253
8078784	XYLB	xylulokinase homolog (H. influenzae)	5.62229	5.66154	5.55524	5.6008	5.66154	5.7625	6.07685	6.0198	5.8617
8175353	XX-FW88277B6.1 /// RP13-36C9.1 /// RP13-36C9.3 /// CT45-4 /// RP13-36C9.6 /// CT45-6	cancer/testis antigen CT45-1 /// cancer/testis antigen CT45 /// cancer/testis antigen CT45-3 /// cancer/testis antigen CT45-4 /// cancer/testis antigen CT45-5 /// cancer/testis antigen CT45-6	3.32408	3.37302	3.46036	3.3423	3.37302	3.36516	3.48187	3.61346	3.37302
8175336	XX-FW88277B6.1 /// RP13-36C9.1 /// RP13-36C9.3 /// CT45-4 /// RP13-36C9.6 /// CT45-6	cancer/testis antigen CT45-1 /// cancer/testis antigen CT45 /// cancer/testis antigen CT45-3 /// cancer/testis antigen CT45-4 /// cancer/testis antigen CT45-5 /// cancer/testis antigen CT45-6	3.56702	3.62534	3.72873	3.58814	3.66981	3.63501	3.71676	3.82662	3.63501
8170052	XX-FW88277B6.1 /// RP13-36C9.1 /// RP13-36C9.3 /// CT45-4 /// RP13-36C9.6 /// CT45-6	cancer/testis antigen CT45-1 /// cancer/testis antigen CT45 /// cancer/testis antigen CT45-3 /// cancer/testis antigen CT45-4 /// cancer/testis antigen CT45-5 /// cancer/testis antigen CT45-6	3.60097	3.5799	3.67682	3.67329	3.64593	3.62543	3.72445	3.78241	3.61311
8170060	XX-FW88277B6.1 /// RP13-36C9.1 /// RP13-36C9.3 /// CT45-4 /// RP13-36C9.6 /// CT45-6	cancer/testis antigen CT45-1 /// cancer/testis antigen CT45 /// cancer/testis antigen CT45-3 /// cancer/testis antigen CT45-4 /// cancer/testis antigen CT45-5 /// cancer/testis antigen CT45-6	3.70862	3.70716	3.85546	3.66182	3.80552	3.75756	3.82683	3.8531	3.75756
8170068	XX-FW88277B6.1 /// RP13-36C9.1 /// RP13-36C9.3 /// CT45-4 /// RP13-36C9.6 /// CT45-6	cancer/testis antigen CT45-1 /// cancer/testis antigen CT45 /// cancer/testis antigen CT45-3 /// cancer/testis antigen CT45-4 /// cancer/testis antigen CT45-5 /// cancer/testis antigen CT45-6	3.95863	3.95863	4.04597	3.95863	3.98872	4.00725	4.0279	3.97948	3.89162
8175344	XX-FW88277B6.1 /// RP13-36C9.1 /// RP13-36C9.3 /// CT45-4 /// RP13-36C9.6 /// CT45-6	cancer/testis antigen CT45-1 /// cancer/testis antigen CT45 /// cancer/testis antigen CT45-3 /// cancer/testis antigen CT45-4 /// cancer/testis antigen CT45-5 /// cancer/testis antigen CT45-6	3.64158	3.63894	3.71711	3.56129	3.78488	3.70454	3.69013	3.69097	3.60112
8000884	XTP3TPA	XTP3-transactivated protein A	9.40004	9.34964	9.45724	9.64226	9.70024	9.51039	9.90914	9.71596	9.80576
7950447	XRRA1	X-ray radiation resistance associated 1	6.4407	6.20976	6.24745	6.19139	6.19187	6.19187	6.18302	6.42273	6.37331
8061324	XRN2	5'-3' exoribonuclease 2	8.8987	8.90835	8.6051	8.83156	8.92895	8.98814	8.77748	9.00251	8.79962
8091141	XRN1	5'-3' exoribonuclease 1	6.46993	6.63232	6.26535	6.66426	6.67214	7.05251	6.18455	6.71487	6.60199
7956648	XRCC6BP1	XRCC6 binding protein 1	5.9521	6.07776	5.97942	5.80782	5.72829	6.01747	6.41033	6.24452	6.4301
8073457	XRCC6	X-ray repair complementing defective repair in Chinese hamster cells 6 (Ku autoantigen, 70kDa)	11.3738	11.3959	11.372	11.6953	11.716	11.5622	11.6715	11.7425	11.6467
8048146	XRCC5	X-ray repair complementing defective repair in Chinese hamster cells 5 (double-strand-break rejoining; Ku autoantigen, 80kDa)	9.87695	9.93108	9.68438	9.85567	9.84878	9.95463	10.1403	10.4395	10.0181
8106730	XRCC4	X-ray repair complementing defective repair in Chinese hamster cells 4	4.34408	4.80555	4.64457	4.92876	5.11538	5.26243	5.02923	4.89565	4.79873
7981447	XRCC3	X-ray repair complementing defective repair in Chinese hamster cells 3	6.33795	6.35234	6.72931	7.14033	7.18118	7.12036	7.52596	7.21584	7.39483
8144036	XRCC2	X-ray repair complementing defective repair in Chinese hamster cells 2	4.27998	3.86573	4.21277	5.6982	6.09681	6.14453	6.85366	6.92766	6.74665
8037331	XRCC1	X-ray repair complementing defective repair in Chinese hamster cells 1	7.96411	7.83649	7.81796	8.28315	8.34995	8.0408	8.10742	8.1394	8.09286
7907861	XPR1	xenotropic and polytropic retrovirus receptor	9.52945	9.5104	9.42367	8.35815	8.50384	8.50589	8.18923	8.39578	8.27623
7956785	XPOT	exportin, tRNA (nuclear export receptor for tRNAs)	8.47042	8.91802	8.57936	9.30512	9.26104	9.44682	9.61396	9.85411	9.79439
8144953	XPO7	exportin 7	9.27064	9.26042	9.08372	9.12603	9.31374	9.08381	9.25697	9.39919	9.30763
8000482	XPO6	exportin 6	9.57469	9.38704	9.32254	9.63538	9.76672	9.59489	10.0866	10.0269	10.0544
8126588	XPO5	exportin 5	8.55253	8.4584	8.3369	8.37622	8.42094	8.2721	8.82221	8.8219	8.78308
7970473	XPO4	exportin 4	5.96061	6.16385	5.97782	5.63725	6.21318	5.93744	6.14978	6.46476	5.92639
8052526	XPO1	exportin 1 (CRM1 homolog, yeast)	8.5225	8.86618	8.31688	8.57499	8.53824	8.84529	8.74587	9.20106	8.59068
8073311	XPNPEP3	X-prolyl aminopeptidase (aminopeptidase P) 3, putative	7.8462	7.65754	7.67116	7.93766	7.98599	7.90751	7.6248	7.86594	7.71454
8169836	XPNPEP2	X-prolyl aminopeptidase (aminopeptidase P) 2, membrane-bound	4.31276	4.13071	4.46788	4.30282	3.94179	4.34162	4.51982	4.20005	4.34143
7936284	XPNPEP1	X-prolyl aminopeptidase (aminopeptidase P) 1, soluble	10.5977	10.5046	10.3806	10.1044	10.1272	9.98404	10.0247	10.0322	10.1502
8085486	XPC	xeroderma pigmentosum, complementation group C	7.12509	7.12333	6.87343	7.46889	7.6913	7.45538	7.11798	7.23227	7.24848
8162696	XPA	xeroderma pigmentosum, complementation group A	6.46353	6.44577	6.34345	6.3962	6.34442	6.47991	6.45009	6.75963	6.48862
8176675	XKRY /// XKRY2	XK, Kell blood group complex subunit-related, Y-linked /// XK, Kell blood group complex subunit-related, Y-linked 2	2.36041	2.25168	2.37139	2.37139	2.38444	2.44209	2.37139	2.51795	2.37139
8177180	XKRY /// XKRY2	XK, Kell blood group complex subunit-related, Y-linked /// XK, Kell blood group complex subunit-related, Y-linked 2	2.36041	2.25168	2.37139	2.37139	2.38444	2.44209	2.37139	2.51795	2.37139
8173999	XKRX	XK, Kell blood group complex subunit-related, X-linked	3.56014	3.81692	3.6682	3.58417	3.72259	3.38992	3.58548	3.49571	3.77793
8146900	XKR9	XK, Kell blood group complex subunit-related family, member 9	3.89183	3.50171	3.40465	3.78082	3.87366	3.48096	3.52792	3.87206	3.67445
7899417	XKR8	XK, Kell blood group complex subunit-related family, member 8	4.79927	5.17304	5.33139	5.08264	5.08264	4.93117	5.11963	4.98434	5.10334
8061647	XKR7	XK, Kell blood group complex subunit-related family, member 7	5.94014	6.05866	6.19555	6.05866	5.89924	6.05866	6.07926	6.0161	6.09723
8149307	XKR6	XK, Kell blood group complex subunit-related family, member 6	5.61276	5.6592	5.73307	5.19192	5.35535	5.45952	5.52195	5.41485	5.44218
8149086	XKR5	XK, Kell blood group complex subunit-related family, member 5	4.52578	4.43298	4.7204	4.38317	4.3633	4.55791	4.38534	4.04573	4.52595
8146475	XKR4	XK, Kell blood group complex subunit-related family, member 4	5.08402	5.47051	5.51889	5.33766	5.19115	5.33766	5.33766	5.09469	5.2983
8074204	XKR3	XK, Kell blood group complex subunit-related family, member 3	3.36973	3.03346	3.29808	3.35915	3.12621	3.01144	2.72248	3.15439	2.98781
8166723	XK	X-linked Kx blood group (McLeod syndrome)	5.065	5.4382	5.70077	5.42238	5.42812	5.39471	5.62279	5.49495	5.49008
8046062	XIRP2	xin actin-binding repeat containing 2	2.87868	3.13412	2.86207	2.86207	2.86207	2.70276	2.79424	2.74321	2.73496
8086341	XIRP1 /// FLJ43080	xin actin-binding repeat containing 1 /// hypothetical protein LOC642987	4.7322	4.80369	4.72286	4.89596	4.93417	5.03757	4.8215	4.8442	4.89596
8169742	XIAP	X-linked inhibitor of apoptosis	7.01891	7.22454	6.82641	7.01123	7.01891	7.35876	7.23762	7.31852	6.9661
8165808	XG	Xg blood group	4.26643	4.1627	4.35686	4.16697	4.23375	4.29928	4.16697	4.09222	4.17292
8051322	XDH	xanthine dehydrogenase	4.10621	4.12214	4.28096	4.31401	4.08047	4.26742	4.26742	3.95863	4.26742
8086595	XCR1	chemokine (C motif) receptor 1	4.76159	4.81062	5.14282	5.18903	5.27983	5.18212	5.30096	5.04809	5.01759
7922127	XCL2	chemokine (C motif) ligand 2	3.45677	3.28984	3.45488	3.09682	3.25809	3.07997	2.93757	3.5519	3.09071
7907156	XCL1	chemokine (C motif) ligand 1	3.57679	4.3349	3.66985	3.46674	4.28518	3.85363	3.51171	3.41973	3.32227
8075182	XBP1	X-box binding protein 1	9.22383	9.12231	9.02628	10.0483	10.0661	9.96192	9.92164	9.82882	10.1054
8167742	XAGE5	X antigen family, member 5	2.92144	3.15616	3.25567	3.41235	3.04005	3.25021	3.10349	3.03953	3.24369
8172806	XAGE3	X antigen family, member 3	5.75271	5.54438	5.85709	5.53374	5.41604	5.95976	5.65565	5.33763	5.62497
8167693	XAGE2 /// CTD-2267G17.3	X antigen family, member 2 /// X antigen family, member 2-like	4.02427	3.81135	4.04921	3.95863	3.93534	4.10356	3.85212	3.65169	3.99787
8172749	XAGE2 /// CTD-2267G17.3	X antigen family, member 2 /// X antigen family, member 2-like	4.02427	3.81135	4.04921	3.95863	3.93534	4.10356	3.85212	3.65169	3.99787
8167701	XAGE1D /// XAGE1C /// XAGE1E /// XAGE1 /// XAGE1B	X antigen family, member 1D /// X antigen family, member 1C /// X antigen family, member 1E /// X antigen family, member 1 /// X antigen family, member 1B	5.01721	5.01721	5.21773	5.15906	4.94686	5.01721	5.08354	4.72266	5.01721
8167710	XAGE1D /// XAGE1C /// XAGE1E /// XAGE1 /// XAGE1B	X antigen family, member 1D /// X antigen family, member 1C /// X antigen family, member 1E /// X antigen family, member 1 /// X antigen family, member 1B	5.01721	5.01721	5.21773	5.15906	4.94686	5.01721	5.08354	4.72266	5.01721
8172739	XAGE1D /// XAGE1C /// XAGE1E /// XAGE1 /// XAGE1B	X antigen family, member 1D /// X antigen family, member 1C /// X antigen family, member 1E /// X antigen family, member 1 /// X antigen family, member 1B	5.01721	5.01721	5.21773	5.15906	4.94686	5.01721	5.08354	4.72266	5.01721
8172757	XAGE1D /// XAGE1C /// XAGE1E /// XAGE1 /// XAGE1B	X antigen family, member 1D /// X antigen family, member 1C /// X antigen family, member 1E /// X antigen family, member 1 /// X antigen family, member 1B	5.01721	5.01721	5.21773	5.15906	4.94686	5.01721	5.08354	4.72266	5.01721
8172766	XAGE1D /// XAGE1C /// XAGE1E /// XAGE1 /// XAGE1B	X antigen family, member 1D /// X antigen family, member 1C /// X antigen family, member 1E /// X antigen family, member 1 /// X antigen family, member 1B	5.01721	5.01721	5.21773	5.15906	4.94686	5.01721	5.08354	4.72266	5.01721
8004184	XAF1	XIAP associated factor 1	7.43747	7.80736	7.31632	7.93756	7.83448	8.03619	7.59387	7.76871	7.93573
8033392	XAB2	XPA binding protein 2	8.62936	8.51211	8.52241	8.84388	8.88707	8.62919	8.63006	8.50948	8.47975
8091422	WWTR1	WW domain containing transcription regulator 1	10.006	10.0996	9.93174	9.64116	9.65801	9.68852	9.47489	9.36488	9.55565
7996976	WWP2	WW domain containing E3 ubiquitin protein ligase 2	8.18323	8.14375	8.11356	8.17459	8.16009	7.94332	7.97759	7.9338	8.02916
8147156	WWP1	WW domain containing E3 ubiquitin protein ligase 1	8.28603	8.60468	8.27521	8.12695	8.1257	8.38032	7.50338	7.64425	7.34016
7997352	WWOX	WW domain containing oxidoreductase	6.44667	6.38392	6.58975	6.50859	6.51962	6.61765	6.49038	6.24366	6.51493
8165947	WWC3	WWC family member 3	7.81398	7.87847	7.7895	8.16876	8.19295	8.05977	7.71991	7.70627	7.72752
8098470	WWC2	WW and C2 domain containing 2	7.45596	7.56269	7.27782	7.58894	7.46199	7.68763	7.86028	8.06059	7.70539
8109773	WWC1	WW and C2 domain containing 1	6.18514	5.85242	6.21213	6.23257	6.18058	6.22501	6.17644	6.23257	6.09022
8027665	WTIP	Wilms tumor 1 interacting protein	6.70194	6.60212	7.02045	7.14639	7.09236	7.15866	7.22775	7.18368	7.22132
8126952	WTAP	Wilms tumor 1 associated protein	9.74697	9.77708	9.60838	9.90552	9.90905	9.98549	10.6205	10.7266	10.5805
8123129	WTAP	Wilms tumor 1 associated protein	7.12233	7.12093	6.83966	7.35204	7.53677	7.28485	7.58651	7.9355	7.36186
7947363	WT1	Wilms tumor 1	5.20237	5.4041	5.60535	5.34265	5.41587	5.36172	5.31524	4.96681	5.14406
7958398	WSCD2	WSC domain containing 2	5.40521	5.56271	5.86302	5.83995	6.0422	5.75716	5.61635	5.29175	5.77362
8004152	WSCD1	WSC domain containing 1	5.02316	5.15554	5.38508	5.06711	4.88597	4.97479	5.06549	4.9182	4.88184
7966829	WSB2	WD repeat and SOCS box-containing 2	11.0191	10.9669	10.9678	10.7773	10.754	10.657	10.7926	10.7254	10.6003
8005765	WSB1	WD repeat and SOCS box-containing 1	8.10986	8.20518	7.83052	8.19485	8.18004	8.1485	8.31404	8.80445	8.76991
8116595	WRNIP1	Werner helicase interacting protein 1	8.42615	8.45258	8.40776	8.32999	8.55018	8.36599	8.38981	8.37567	8.38713
8145702	WRN	Werner syndrome	4.90653	5.12531	4.83556	5.00617	5.12531	5.31272	5.2691	5.73232	5.33293
8068612	WRB	tryptophan rich basic protein	9.03861	9.05048	8.95994	8.62023	8.75145	8.78056	9.14795	9.33734	9.17664
8007895	WNT9B	wingless-type MMTV integration site family, member 9B	6.67588	6.95407	7.15428	6.94881	6.78791	6.98965	6.73935	6.50317	6.69073
7924832	WNT9A	wingless-type MMTV integration site family, member 9A	6.52051	6.52274	6.88393	6.5071	6.52398	6.43288	6.5071	6.29083	6.34976
7929822	WNT8B	wingless-type MMTV integration site family, member 8B	4.7556	4.76398	4.92001	4.75406	4.72936	4.76851	4.37073	4.56684	4.71414
8108287	WNT8A	wingless-type MMTV integration site family, member 8A	5.2632	5.44473	5.44111	5.37964	5.24216	5.25869	5.17611	5.05046	5.52795
8076734	WNT7B	wingless-type MMTV integration site family, member 7B	5.5073	5.78645	6.12173	5.89771	5.69089	5.82445	5.78946	5.26104	5.49384
8085475	WNT7A	wingless-type MMTV integration site family, member 7A	5.56394	5.73737	6.22687	5.69263	5.6555	5.59738	5.72912	5.25517	5.29542
8048445	WNT6	wingless-type MMTV integration site family, member 6	6.84357	6.97508	7.17607	6.89393	6.84716	6.93458	6.7792	6.68536	6.74308
7953012	WNT5B	wingless-type MMTV integration site family, member 5B	6.19373	6.16905	6.30611	6.21445	6.23163	6.36353	6.22909	6.06272	6.26073
8088180	WNT5A	wingless-type MMTV integration site family, member 5A	9.15085	9.15986	8.94367	8.04958	8.0458	8.18542	8.49303	8.7315	8.47858
7913547	WNT4	wingless-type MMTV integration site family, member 4	5.99953	5.86492	6.12394	5.75727	5.74058	6.17169	5.91054	5.84306	5.74733
7910217	WNT3A	wingless-type MMTV integration site family, member 3A	5.45434	5.42885	5.77673	5.37031	5.4427	5.47457	5.33997	5.32465	5.44399
8016311	WNT3	wingless-type MMTV integration site family, member 3	5.88282	5.84369	6.05789	6.08991	5.8132	6.25894	6.08019	5.8201	6.03568
7904025	WNT2B	wingless-type MMTV integration site family, member 2B	5.29827	5.20812	5.17319	5.06014	5.10431	5.20812	5.20812	4.89761	5.08244
8142471	WNT2	wingless-type MMTV integration site family member 2	3.48297	3.59875	3.78622	3.52724	3.49615	3.56922	3.56723	3.42166	3.57321
8135763	WNT16	wingless-type MMTV integration site family, member 16	4.71616	4.6441	4.82674	4.53566	4.75073	4.58875	4.45924	4.75585	4.64151
7950534	WNT11	wingless-type MMTV integration site family, member 11	5.36274	5.13579	5.49226	5.23543	5.20454	5.20454	4.98522	5.16805	5.12055
7962918	WNT10B	wingless-type MMTV integration site family, member 10B	6.18415	6.56208	7.0198	6.79037	6.66003	6.71593	6.58864	6.20745	6.52306
8048452	WNT10A	wingless-type MMTV integration site family, member 10A	6.30288	6.39938	6.69883	6.45637	6.45637	6.45637	6.56793	6.13012	6.1482
7955170	WNT1	wingless-type MMTV integration site family, member 1	6.63769	6.69169	6.92672	6.7499	6.5264	6.69207	6.67843	6.48257	6.63582
8007363	WNK4	WNK lysine deficient protein kinase 4	5.44547	5.31535	5.4527	5.36723	5.42414	5.3958	5.19281	4.89815	5.22292
8173059	WNK3	WNK lysine deficient protein kinase 3	4.26588	3.71083	3.85667	3.74839	3.76444	3.86546	3.74839	3.7094	3.87095
8156415	WNK2	WNK lysine deficient protein kinase 2	5.17506	5.32226	5.54035	5.35112	5.31452	5.31364	5.31364	5.0676	5.23201
7952953	WNK1	WNK lysine deficient protein kinase 1	8.98524	8.97588	8.72243	8.26753	8.30932	8.46909	8.98654	9.14522	9.05519
8035040	WIZ	widely interspaced zinc finger motifs	7.24965	7.17402	7.22982	7.00023	6.96788	6.73377	6.98449	6.91636	6.88889
7939131	WIT1	Wilms tumor upstream neighbor 1	4.06496	4.29554	4.50411	4.24593	4.29554	4.29554	4.29554	4.17403	4.29554
8121532	WISP3	WNT1 inducible signaling pathway protein 3	3.79235	3.61257	4.02255	3.85387	3.79235	3.95863	3.79235	3.77412	3.7723
8062864	WISP2	WNT1 inducible signaling pathway protein 2	6.49028	6.56185	6.7947	6.6484	6.60717	6.72484	6.62574	6.39685	6.70649
8148435	WISP1	WNT1 inducible signaling pathway protein 1	6.62919	6.46065	6.60265	6.58178	6.62919	6.62845	5.98149	5.82847	6.35552
8131303	WIPI2	WD repeat domain, phosphoinositide interacting 2	9.65292	9.54977	9.50107	9.31623	9.43249	9.29602	9.18432	9.09207	9.11009
8017850	WIPI1	WD repeat domain, phosphoinositide interacting 1	10.4967	10.4288	10.267	10.7057	10.7211	10.5949	8.88069	8.91832	9.05966
8132036	WIPF3	WAS/WASL interacting protein family, member 3	5.08151	5.30196	5.78559	5.43338	5.40149	5.36907	5.46368	5.30261	5.56217
8007058	WIPF2	WAS/WASL interacting protein family, member 2	6.62347	6.53908	6.48735	6.89072	7.05084	6.9099	6.68949	6.84772	6.84772
8056860	WIPF1	WAS/WASL interacting protein family, member 1	6.89564	6.63441	6.73287	8.06562	8.15871	8.27927	7.71236	7.93294	7.92777
7964722	WIF1	WNT inhibitory factor 1	3.6086	3.66439	3.69184	3.55528	3.81352	3.59827	3.75057	3.75818	3.75286
7963965	WIBG	within bgcn homolog (Drosophila)	7.10865	7.01444	7.15627	7.4043	7.23207	7.33395	7.17864	6.92971	7.09518
8098942	WHSC2	Wolf-Hirschhorn syndrome candidate 2	8.0185	7.9932	8.13997	8.17586	8.14945	8.04153	8.17548	7.89394	8.05013
8150287	WHSC1L1	Wolf-Hirschhorn syndrome candidate 1-like 1	6.92847	7.34326	6.86193	7.31909	7.18934	7.59764	6.99427	7.48672	7.44616
8093539	WHSC1	Wolf-Hirschhorn syndrome candidate 1	7.14	7.0951	6.84736	7.4609	7.55021	7.40995	7.8692	7.98863	7.80509
7986687	WHDC1L1 /// WHDC1L2 /// LOC652637	WAS protein homology region 2 domain containing 1-like 1 /// WAS protein homology region 2 domain containing 1-like 2 /// similar to junction-mediating and regulatory protein	5.35674	5.4163	5.4394	5.48197	5.36749	5.47812	5.56553	5.78228	5.50418
7985482	WHDC1	WAS protein homology region 2 domain containing 1	6.54956	6.47319	6.36273	6.59059	6.63644	6.6169	6.55667	6.63108	6.60187
8093906	WFS1	Wolfram syndrome 1 (wolframin)	7.41991	7.24946	7.24294	7.34798	7.42176	7.21607	7.46651	7.40798	7.40959
8008511	WFIKKN2	WAP, follistatin/kazal, immunoglobulin, kunitz and netrin domain containing 2	5.78288	5.88481	6.12861	6.19686	5.72386	5.9373	5.88333	5.53878	5.7656
7991927	WFIKKN1	WAP, follistatin/kazal, immunoglobulin, kunitz and netrin domain containing 1	6.11037	6.10904	6.26647	6.14922	6.11964	6.16962	6.06243	6.11964	5.97457
8066559	WFDC9	WAP four-disulfide core domain 9	2.97783	2.9874	3.24595	3.55969	3.3429	3.12615	3.24595	3.15786	3.25637
8066549	WFDC8	WAP four-disulfide core domain 8	3.32563	3.43967	3.02578	3.1518	3.02463	3.15955	3.21908	3.16583	3.10476
8066536	WFDC6 /// SPINLW1	WAP four-disulfide core domain 6 /// serine peptidase inhibitor-like, with Kunitz and WAP domains 1 (eppin)	4.23545	4.32206	4.41403	4.59382	4.2997	4.2285	4.36024	4.04678	4.05114
8066482	WFDC5	WAP four-disulfide core domain 5	4.74939	4.58253	4.64086	4.69615	4.63782	4.95181	4.69091	4.44337	4.55319
8066579	WFDC3	WAP four-disulfide core domain 3	5.50209	5.39094	5.22013	5.30525	4.66313	5.44646	5.39094	5.55681	5.47757
8063000	WFDC2	WAP four-disulfide core domain 2	5.45675	5.5074	5.80134	5.57841	5.35363	5.41558	5.3758	4.76438	5.41558
8063014	WFDC13	WAP four-disulfide core domain 13	5.36061	5.10951	5.31856	5.10951	5.04326	5.10951	5.03758	4.80297	4.9771
8066489	WFDC12	WAP four-disulfide core domain 12	4.38	4.73554	4.70281	4.88022	4.48254	4.70281	4.73283	4.47362	4.6526
8066569	WFDC11	WAP four-disulfide core domain 11	2.95878	2.66028	2.9416	3.00043	2.85572	2.87933	2.72543	2.66246	3.05772
8066574	WFDC10B	WAP four-disulfide core domain 10B	4.58864	4.16791	4.05399	4.24213	4.37457	4.24213	4.25272	3.91342	4.04833
8063011	WFDC10A	WAP four-disulfide core domain 10A	3.5994	3.50751	3.79591	3.74072	3.52474	3.84338	3.87621	3.66977	3.36455
7997582	WFDC1	WAP four-disulfide core domain 1	5.54118	5.73813	5.8893	5.61669	5.61669	5.95608	5.63178	5.5061	5.50412
7938366	WEE1	WEE1 homolog (S. pombe)	5.96247	5.93479	5.80515	5.73603	5.94756	5.93526	7.00625	7.25287	7.05435
7938348	WEE1	WEE1 homolog (S. pombe)	6.61383	6.80125	6.52411	7.13436	7.23917	7.13769	8.39943	8.27536	8.2461
7938364	WEE1	WEE1 homolog (S. pombe)	6.17534	5.93814	5.84251	6.2088	6.45872	6.23121	6.92956	7.42958	7.13255
7899289	WDTC1	WD and tetratricopeptide repeats 1	8.86717	8.71619	8.73438	8.0098	8.14784	7.95538	8.37919	8.28943	8.51831
8056047	WDSUB1	WD repeat, sterile alpha motif and U-box domain containing 1	5.51881	5.40183	5.3693	5.05071	5.16105	5.07917	4.65444	5.1779	5.01237
8147785	WDSOF1	WD repeats and SOF1 domain containing	7.05784	7.44813	7.16924	7.39055	7.12929	7.22635	7.37051	7.5839	7.22056
7985898	WDR93	WD repeat domain 93	3.57157	3.57066	3.7046	3.82468	3.69769	3.41937	3.66129	3.36741	3.57743
8052703	WDR92	WD repeat domain 92	6.82452	6.80855	6.54247	6.36592	6.38438	6.51149	6.41887	6.71457	6.50488
8052733	WDR92	WD repeat domain 92	2.28781	2.49093	2.64731	2.52837	2.44348	2.31752	2.32295	2.99091	2.12832
8052731	WDR92	WD repeat domain 92	4.13259	4.03657	4.34701	4.08263	4.13259	4.06792	4.13945	4.20653	4.04965
8052719	WDR92	WD repeat domain 92	5.12947	4.97752	5.18784	5.18784	5.18784	5.47178	5.15515	4.98445	5.18784
8143070	WDR91	WD repeat domain 91	7.01371	6.84523	7.01371	7.18557	7.02374	7.01371	6.86967	7.01371	7.24869
7991939	WDR90	WD repeat domain 90	5.74645	5.82693	6.04522	5.81864	5.91671	5.86188	5.84504	5.59718	5.81839
7979565	WDR89	WD repeat domain 89	5.69895	5.36488	5.36228	5.24047	5.55558	5.65832	5.30218	6.26867	5.59197
7942791	WDR88 /// LOC100008589	WD repeat domain 88 /// 28S ribosomal RNA	14.2701	14.3338	14.334	14.2499	14.2424	14.2893	14.3019	14.2807	14.1445
8027543	WDR88	WD repeat domain 88	3.97843	4.04994	4.16088	4.17644	3.84806	4.11517	4.11476	3.74566	3.8542
8036451	WDR87	WD repeat domain 87	4.42179	4.49866	4.61227	4.12526	4.0862	4.50515	4.39928	4.42145	4.43381
8143941	WDR86	WD repeat domain 86	6.19184	6.43422	6.66314	6.48089	6.26831	6.34791	6.27469	6.06758	6.05866
8165610	WDR85	WD repeat domain 85	6.04611	6.16512	6.39494	6.2945	6.33759	6.26414	6.54463	6.39589	6.21479
8087874	WDR82	WD repeat domain 82	10.1999	10.0888	9.98188	10.1469	10.1715	10.1622	9.60381	9.69627	9.69927
8003639	WDR81	WD repeat domain 81	7.21566	7.01527	6.88715	7.41151	7.53844	7.37369	6.95018	6.85011	6.93479
7911839	WDR8	WD repeat domain 8	6.59209	6.41582	6.40695	6.42887	6.52448	6.36968	6.44094	6.57958	6.38393
8004556	WDR79	WD repeat domain 79	6.37502	6.3286	6.32314	6.6663	6.57814	6.54606	6.67969	6.63329	6.55078
7916789	WDR78	WD repeat domain 78	3.51634	3.54397	3.61316	3.83885	3.75957	4.22349	3.21508	3.47442	3.65241
7918517	WDR77	WD repeat domain 77	9.5082	9.45741	9.41906	9.0674	9.13349	8.89952	9.46089	9.37791	9.19336
7983306	WDR76	WD repeat domain 76	5.54176	5.77625	5.37491	7.29371	7.65545	7.44036	7.81287	8.12527	7.67642
8046975	WDR75	WD repeat domain 75	6.89881	7.25624	6.88506	7.18652	7.24139	7.34903	7.49393	7.79833	7.51404
8019709	WDR74 /// RNU2 /// RNU2B	WD repeat domain 74 /// RNA, U2 small nuclear /// RNA, U2B small nuclear	10.6048	10.6488	10.7184	11.1816	11.0861	11.0135	10.8768	10.9123	10.4898
8019631	WDR74 /// RNU2 /// RNU2B	WD repeat domain 74 /// RNA, U2 small nuclear /// RNA, U2B small nuclear	10.6734	10.7215	10.8176	11.2711	11.2173	11.1455	10.9429	10.9493	10.5633
8019633	WDR74 /// RNU2 /// RNU2B	WD repeat domain 74 /// RNA, U2 small nuclear /// RNA, U2B small nuclear	10.6734	10.7215	10.8176	11.2711	11.2173	11.1455	10.9429	10.9493	10.5633
8019635	WDR74 /// RNU2 /// RNU2B	WD repeat domain 74 /// RNA, U2 small nuclear /// RNA, U2B small nuclear	10.6734	10.7215	10.8176	11.2711	11.2173	11.1455	10.9429	10.9493	10.5633
8019637	WDR74 /// RNU2 /// RNU2B	WD repeat domain 74 /// RNA, U2 small nuclear /// RNA, U2B small nuclear	10.6734	10.7215	10.8176	11.2711	11.2173	11.1455	10.9429	10.9493	10.5633
8019639	WDR74 /// RNU2 /// RNU2B	WD repeat domain 74 /// RNA, U2 small nuclear /// RNA, U2B small nuclear	10.6734	10.7215	10.8176	11.2711	11.2173	11.1455	10.9429	10.9493	10.5633
8019641	WDR74 /// RNU2 /// RNU2B	WD repeat domain 74 /// RNA, U2 small nuclear /// RNA, U2B small nuclear	10.6734	10.7215	10.8176	11.2711	11.2173	11.1455	10.9429	10.9493	10.5633
8019703	WDR74 /// RNU2 /// RNU2B	WD repeat domain 74 /// RNA, U2 small nuclear /// RNA, U2B small nuclear	10.6734	10.7215	10.8176	11.2711	11.2173	11.1455	10.9429	10.9493	10.5633
8019705	WDR74 /// RNU2 /// RNU2B	WD repeat domain 74 /// RNA, U2 small nuclear /// RNA, U2B small nuclear	10.6734	10.7215	10.8176	11.2711	11.2173	11.1455	10.9429	10.9493	10.5633
8019707	WDR74 /// RNU2 /// RNU2B	WD repeat domain 74 /// RNA, U2 small nuclear /// RNA, U2B small nuclear	10.6734	10.7215	10.8176	11.2711	11.2173	11.1455	10.9429	10.9493	10.5633
8019802	WDR74 /// RNU2 /// RNU2B	WD repeat domain 74 /// RNA, U2 small nuclear /// RNA, U2B small nuclear	10.5017	10.6199	10.7279	11.1558	11.0702	11.0415	10.883	10.78	10.368
7948894	WDR74	WD repeat domain 74	6.22156	6.37692	6.37519	6.92545	6.75774	6.79922	6.54414	6.58963	6.13271
7948881	WDR74	WD repeat domain 74	9.1302	8.91995	9.00506	9.47461	9.50773	9.22728	9.45214	9.29183	9.52642
7991126	WDR73	WD repeat domain 73	8.31835	8.23456	8.14129	8.28533	8.37656	8.27528	7.96901	8.21734	8.2393
7988990	WDR72	WD repeat domain 72	4.50276	4.58724	4.21861	4.26753	4.05734	4.25493	4.27429	4.46601	4.6484
8104998	WDR70	WD repeat domain 70	7.44039	7.41023	7.01765	7.44974	7.21428	7.46278	7.50544	7.65784	7.50863
8021312	WDR7	WD repeat domain 7	7.28404	7.26242	6.98322	6.25639	6.301	6.19314	6.58875	7.06198	6.68398
8048870	WDR69	WD repeat domain 69	3.2885	3.25353	3.36174	3.38787	3.26315	3.40896	3.05398	3.00563	3.00021
8009164	WDR68	WD repeat domain 68	10.3918	10.2546	10.2456	9.73452	9.81152	9.64918	10.1599	10.123	10.1092
8148158	WDR67	WD repeat domain 67	5.68839	5.70686	5.72822	5.68342	5.62484	5.78737	5.89421	6.04122	5.81711
7959330	WDR66	WD repeat domain 66	4.85164	4.70407	4.74239	4.70876	4.72163	4.66376	4.78721	4.68873	4.38164
7900639	WDR65	WD repeat domain 65	4.07607	4.62401	4.46155	4.50385	4.23617	4.57257	4.36085	4.06207	4.36085
7910971	WDR64	WD repeat domain 64	2.59655	2.77798	2.77798	2.77798	2.77798	2.77798	2.77481	2.78064	2.7869
7902660	WDR63	WD repeat domain 63	4.31154	4.31616	4.34933	4.03867	3.86422	4.07117	3.69042	4.01381	3.99024
8028119	WDR62	WD repeat domain 62	6.08309	6.05287	6.09187	7.36351	7.40638	7.26074	7.45423	7.3971	7.32045
7990700	WDR61	WD repeat domain 61	6.68738	6.7359	6.53581	6.53119	6.52795	6.54874	6.57508	6.58998	6.48228
8137639	WDR60	WD repeat domain 60	6.27729	6.67465	6.14849	6.19375	6.20257	6.12175	5.75916	6.19414	5.83277
8079693	WDR6	WD repeat domain 6	9.23443	9.08263	9.19615	8.90875	8.8721	8.78593	8.79761	8.65585	8.80908
8089993	WDR5B	WD repeat domain 5B	6.31759	6.31442	6.24128	6.67801	6.76838	6.89401	6.47847	6.70114	6.57551
8002802	WDR59	WD repeat domain 59	7.87315	7.72954	7.80626	7.86117	7.82209	7.7863	7.91003	7.90359	7.94701
7914334	WDR57	WD repeat domain 57 (U5 snRNP specific)	8.01162	7.8067	7.59549	7.98748	8.21681	7.91989	8.69345	8.6212	8.59663
8108593	WDR55	WD repeat domain 55	8.33971	8.23058	8.16882	7.70765	7.74521	7.59222	8.03276	8.04147	8.06908
8042843	WDR54	WD repeat domain 54	8.02691	7.87404	8.06621	8.20017	8.24544	7.88404	7.48859	7.51769	7.60775
8093141	WDR53	WD repeat domain 53	6.33845	6.45102	6.21842	6.78915	7.05315	6.75973	6.94132	7.31556	7.13464
8089596	WDR52	WD repeat domain 52	4.07573	4.09675	4.20682	4.20122	4.58549	3.88858	4.35866	4.5853	4.05224
8089606	WDR52	WD repeat domain 52	3.43186	3.41653	3.22258	3.48303	3.643	3.58962	3.34544	3.30186	3.19093
8087839	WDR51A	WD repeat domain 51A	5.31615	5.32805	5.40868	6.11252	6.24556	5.73416	6.46483	6.3447	6.42135
8159111	WDR5	WD repeat domain 5	8.19814	7.9519	8.08297	8.393	8.46813	8.30882	8.95378	8.72815	8.82462
8091922	WDR49	WD repeat domain 49	3.24215	3.63553	3.3157	3.3188	3.19421	3.56883	3.28337	3.39908	3.0867
8078834	WDR48	WD repeat domain 48	7.28086	7.50894	7.14107	7.55956	7.58297	7.60074	7.30688	7.5828	7.27702
7918275	WDR47	WD repeat domain 47	5.90427	5.84512	5.53318	5.54667	5.7174	5.54063	5.58507	5.77111	5.66425
8125671	WDR46	WD repeat domain 46	7.57806	7.62363	7.63603	8.35314	8.26145	8.22904	8.208	8.18608	8.12513
8178939	WDR46	WD repeat domain 46	7.57806	7.62363	7.63603	8.35314	8.26145	8.22904	8.208	8.18608	8.12513
8019523	WDR45L	WDR45-like	9.80708	9.84899	9.77426	9.75481	9.75784	9.67706	9.89783	9.98569	9.9738
8172538	WDR45	WD repeat domain 45	8.80603	8.66196	8.56795	8.73744	8.59788	8.52061	8.21716	8.1684	8.42808
8169519	WDR44	WD repeat domain 44	6.28299	6.49025	6.19211	6.168	6.35654	6.11035	6.11829	6.44666	6.30226
8041149	WDR43	WD repeat domain 43	7.45243	7.58117	7.23035	7.45886	7.49722	7.49532	7.75232	7.80572	7.68383
8171885	WDR42B	WD repeat domain 42B	4.0085	4.27374	4.36205	4.41019	4.13639	4.15507	4.19824	3.89735	4.01746
7921552	WDR42A	WD repeat domain 42A	8.37514	8.2871	8.12677	8.33063	8.2758	8.21308	7.98464	8.11666	8.11885
8112746	WDR41	WD repeat domain 41	9.47171	9.56054	9.20741	9.21693	9.35196	9.3679	9.49298	9.74757	9.49072
8174968	WDR40C	WD repeat domain 40C	4.95127	5.11078	5.2017	5.01594	5.00679	5.11552	4.74968	4.77302	4.7155
8174972	WDR40B	WD repeat domain 40B	4.80717	4.79239	5.04029	4.94287	5.06008	4.9933	5.02592	4.66072	4.74861
8160756	WDR40A	WD repeat domain 40A	10.2388	10.161	10.1594	9.88503	9.94091	9.87468	10.2264	10.2002	10.2914
8070615	WDR4	WD repeat domain 4	7.3706	7.24848	7.23416	7.3219	7.25495	7.1307	7.93412	7.96654	7.84006
8157818	WDR38	WD repeat domain 38	5.99733	5.87697	5.8599	6.17558	5.92858	6.19314	5.69295	5.57124	5.81773
7925851	WDR37	WD repeat domain 37	7.26091	6.98941	6.90012	6.86358	6.76876	6.73122	6.723	6.8328	6.70993
8107282	WDR36	WD repeat domain 36	8.09076	8.16892	7.79278	7.33506	7.42202	7.59037	7.91124	8.37481	8.06588
8050507	WDR35	WD repeat domain 35	4.8202	4.58225	4.59567	4.675	4.735	4.6185	4.43349	4.53636	4.49754
8164440	WDR34	WD repeat domain 34	7.40816	7.38028	7.62868	7.98716	7.7814	7.8811	8.18126	8.20053	8.00609
8055060	WDR33	WD repeat domain 33	7.57683	7.57472	7.4291	7.51764	7.62084	7.55967	7.58978	7.8719	7.57089
8155312	WDR32	WD repeat domain 32	7.76566	7.82135	7.71661	7.93048	8.01262	8.00414	7.76218	7.96536	7.85867
8163491	WDR31	WD repeat domain 31	6.0246	6.37488	6.2036	6.15217	6.37385	6.36453	5.74087	5.62891	5.91971
7904364	WDR3	WD repeat domain 3	6.51971	6.70643	6.30606	6.50245	6.45872	6.33948	6.87742	7.24983	6.854
8130891	WDR27	WD repeat domain 27	5.55053	5.48005	5.50416	5.13182	5.37371	5.2159	5.10083	5.1082	5.37371
7924582	WDR26	WD repeat domain 26	8.42801	8.35951	8.07006	7.98741	7.90236	7.95711	7.88269	7.92277	7.87737
7976766	WDR25	WD repeat domain 25	6.67692	6.63593	6.82139	6.31309	6.44509	6.29084	6.5099	6.2366	6.5107
7998280	WDR24	WD repeat domain 24	6.8174	6.81484	7.11602	7.10584	7.02386	7.02682	7.07383	7.11135	7.1076
7973545	WDR23	WD repeat domain 23	9.11149	8.98262	9.05751	8.90525	8.76125	8.79442	8.57621	8.52735	8.7097
7979849	WDR22	WD repeat domain 22	9.53251	9.56554	9.35631	9.54402	9.61835	9.64242	9.29981	9.32208	9.52808
8151679	WDR21C	WD repeat domain 21C	3.83647	4.19734	4.56661	4.21701	4.11868	4.09359	3.85526	3.9011	4.16023
8094843	WDR21B	WD repeat domain 21B	4.50562	4.10476	4.07905	3.8247	4.11172	4.05702	3.99838	4.10161	4.11425
7975506	WDR21A	WD repeat domain 21A	7.09593	6.85373	6.69752	6.85675	6.92921	6.82408	6.94333	6.8678	6.87141
7976957	WDR20	WD repeat domain 20	6.11516	5.93997	6.08306	6.03461	5.85324	5.7341	5.80346	6.02423	5.93583
8094638	WDR19	WD repeat domain 19	6.35054	6.42528	5.9383	6.05699	6.0689	5.98155	5.34354	5.74014	5.9035
8024089	WDR18	WD repeat domain 18	8.48147	8.32401	8.6434	8.50203	8.33868	8.36614	8.09917	8.22069	8.21118
8098379	WDR17	WD repeat domain 17	4.58864	4.63383	4.87008	4.42316	4.56137	4.58346	4.82971	4.84664	4.75524
8004889	WDR16	WD repeat domain 16	3.57338	3.62843	3.60881	3.71262	3.62843	3.62032	3.52307	3.62747	3.62843
8167322	WDR13	WD repeat domain 13	8.62609	8.42881	8.48761	8.53685	8.52922	8.45702	8.20896	8.18906	8.2349
8058373	WDR12	WD repeat domain 12	8.6008	8.47148	8.45859	8.18402	8.38949	8.23314	8.46611	8.60145	8.4244
8099340	WDR1	WD repeat domain 1	10.7653	10.6076	10.6398	10.7452	10.7018	10.5294	10.9203	10.8314	10.8586
7979281	WDHD1	WD repeat and HMG-box DNA binding protein 1	4.87755	4.6025	4.47319	5.54939	5.81938	5.89019	6.20269	6.92379	6.29656
7927425	WDFY4 /// C10orf64	WDFY family member 4 /// chromosome 10 open reading frame 64	5.22492	5.16592	5.38587	5.24698	5.19663	5.24892	5.22492	5.0948	5.22194
8101511	WDFY3	WD repeat and FYVE domain containing 3	7.84359	7.76263	7.54635	7.61347	7.6942	7.76848	7.48121	7.8465	7.60159
7969204	WDFY2	WD repeat and FYVE domain containing 2	6.45574	6.55126	6.38976	6.65147	6.57213	6.53915	7.32298	7.39993	7.32259
8059361	WDFY1	WD repeat and FYVE domain containing 1	7.97745	8.22786	7.99171	7.00009	7.16014	7.16697	7.88062	8.21794	8.11349
8133366	WBSCR28	Williams-Beuren syndrome chromosome region 28	4.96601	4.98625	5.21144	5.1298	5.0834	5.03909	4.82259	4.84896	4.91361
8140144	WBSCR27	Williams Beuren syndrome chromosome region 27	6.16468	6.55166	6.59804	6.65593	6.51287	6.62985	6.34169	6.04026	6.39502
8133500	WBSCR23	Williams-Beuren syndrome chromosome region 23	5.3534	5.49468	5.44652	5.38183	5.28919	5.15462	5.4752	5.57285	5.5257
8133345	WBSCR22	Williams Beuren syndrome chromosome region 22	10.3149	10.2079	10.2218	9.8962	9.87044	9.64814	10.3605	10.2057	10.2036
8133654	WBSCR19 /// tcag7.1017 /// MGC119295 /// LOC441251 /// LOC389517 /// LOC442590 /// LOC100132581 /// LOC100134667 /// LOC730294	Williams Beuren syndrome chromosome region 19 /// similar to Williams Beuren syndrome chromosome region 19 /// similar to Williams-Beuren syndrome critical region protein 19 /// Williams Beuren syndrome chromosome region 19 pseudogene /// Williams Beuren syndrome chromosome region 19 pseudogene /// similar to Williams Beuren syndrome chromosome region 19 /// similar to Williams Beuren syndrome ch…	5.94738	6.05178	6.23988	6.07662	5.99615	5.99615	6.04956	5.85012	5.99615
[truncated: 21,016 more rows]
